# Supplementary material for: A Comprehensive Survey of Statistical Approaches for Differential Expression Analysis in Single-Cell RNA Sequencing Studies
Source: MDPI journal article supplement (doi:10.3390/genes12121947), 2021-12-02
Supplement: s1 [file s1]

**Supplementary Materials**  
**of**  
**A Comprehensive Survey of Statistical Approaches for Differential Expression**  
**Analysis in Single-cell RNA Sequencing Studies**

Samarendra Das<sup>1-3</sup>, Anil Rai<sup>4</sup>, Michael L. Merchant<sup>5,6</sup>, Matthew C. Cave<sup>7</sup> and Shesh N. Rai<sup>2,3,6-9 \*</sup>

<sup>1</sup>Division of Statistical Genetics, ICAR-Indian Agricultural Statistics Research Institute, PUSA, New Delhi 110012, India

<sup>2</sup>Biostatistics and Bioinformatics Facility, JG Brown Cancer Center, University of Louisville, Louisville, KY 40202, USA

<sup>3</sup>School of Interdisciplinary and Graduate Studies, University of Louisville, Louisville, KY 40292, USA

<sup>4</sup>Centre for Agricultural Bioinformatics, ICAR-Indian Agricultural Statistics Research Institute, PUSA, New Delhi 110012, India

<sup>5</sup>Department of Medicine, School of Medicine, University of Louisville, Louisville, KY 40202, USA

<sup>6</sup>Hepatobiology and Toxicology Center, University of Louisville, Louisville, KY 40202, USA

<sup>7</sup>Biostatistics and Informatics Facility, Center for Integrative Environmental Health Sciences, University of Louisville, Louisville, KY 40202, USA

<sup>8</sup>Christina Lee Brown Envirome Institute, University of Louisville, Louisville, KY 40202, USA

<sup>9</sup>Department of Bioinformatics and Biostatistics, School of Public Health and Information Science, University of Louisville, Louisville, KY 40202, USA

**Authors' email addresses:**

SD: [samarendra.das@louisville.edu](mailto:samarendra.das@louisville.edu)

AR: [anil.raai@icar.gov.in](mailto:anil.raai@icar.gov.in)

MLM: [michael.merchant@louisville.edu](mailto:michael.merchant@louisville.edu)

MCC: [matt.cave@louisville.edu](mailto:matt.cave@louisville.edu)

SNR: [shesh.raai@louisville.edu](mailto:shesh.raai@louisville.edu)

**\*To whom the correspondence should be addressed-** email: [shesh.raai@louisville.edu](mailto:shesh.raai@louisville.edu).

## **Contents**

| <b>Sl. No.</b> | <b>Topics</b>                                                | <b>Page</b> |
|----------------|--------------------------------------------------------------|-------------|
| 1              | Descriptions of the single-cell datasets                     | 1 – 7       |
| 2              | Reference genes for single-cell studies                      | 17 – 10     |
| 3              | Count data models in scRNA-seq                               | 10 – 14     |
| 3.1            | Negative Binomial Model                                      |             |
| 3.2            | Zero Inflated Negative Binomial Model                        |             |
| 3.3            | Poisson Model                                                |             |
| 3.4            | Zero Inflated Poisson Model                                  |             |
| 3.5            | Hermite distribution model                                   |             |
| 4              | Normalization methods in scRNA-seq data analysis             | 14 – 15     |
| 4.1            | TMM                                                          |             |
| 4.2            | DESeq-norm                                                   |             |
| 5              | List of the methods used in this comparative study           | 15 – 18     |
| 6              | List of the criteria used in this study                      | 18 – 19     |
| 7              | MCDM-TOPSIS Analysis                                         | 19 – 21     |
| 8              | Testing for zero inflation in scRNA-seq data                 | 22 – 23     |
| 9              | Testing for overdispersion parameters in scRNA-seq data      | 23 – 24     |
| 10             | Application of count models                                  | 24 – 29     |
| 10.1           | Application to embryonic mouse cysts data                    |             |
| 10.2           | Application to real scRNA-seq data                           |             |
| 11             | Comparative analysis of NB and ZINB models                   | 30 – 31     |
| 12             | Performance evaluation of methods based on runtime criterion | 32 – 33     |
| 13             | Similarity analysis of methods                               | 34 – 36     |
| 13.1           | Similarity analysis based on detection of common DE genes    |             |
| 13.2           | Combined analysis of methods based on common DE genes        |             |
| 14             | Supplementary Figures                                        | 37 – 60     |
| 15             | Computed performance metrics (Tables)                        | 61 – 93     |
| 16             | Ranking of methods across all datasets                       | 94 – 97     |
| 17             | Conflicts among criteria in real datasets                    | 98 – 101    |
| 18             | Effects of data characteristics of methods' performance      | 102         |
| 19             | References                                                   | 103 – 105   |

## **Documentary S1: Descriptions of the Single-cell datasets used in this study**

**A. *Islam Data*** (<https://www.ncbi.nlm.nih.gov/geo/query/acc.cgi?acc=GSE29087>): This dataset is publicly available in NCBI Gene Expression Omnibus (GEO) database with accession GSE29087 [1] and widely used for benchmarking of scRNA-seq DE methods. Single-cell expression profiles were available for 96 cells (48 mouse Embryonic Stem (ES) cells, 44 Mouse Embryonic Fibroblasts (MEF) and 4 negative controls). Here, the negative control cells were removed from further analysis. For DE analysis, ES and MEF cell lines are considered as two cellular groups. Here, we have not removed any cells from analysis, and further removed the genes which have non-zero expressions in  $\leq 5$  cells. Through this process, we selected expression counts of 11436 genes over 92 cells. A brief description about this data is given in Table S1.

**B. *Tung Data*** ([www.ncbi.nlm.nih.gov/geo/query/acc.cgi?acc=GSE77288](http://www.ncbi.nlm.nih.gov/geo/query/acc.cgi?acc=GSE77288)): This dataset is publicly available in NCBI GEO database with accession id GSE77288 [2] and the UMI count data is also available at GitHub. We downloaded the filtered UMI count matrix along with the spike-ins and molecular concentration data from their GitHub repository (<https://github.com/jdblischak/singleCellSeq>). The full dataset contains three Yoruba (YRI) induced pluripotent stem cell (iPSC) lines. Here, we only used data of two individual cell lines NA19101 (288 cells) and NA19239 (288 cells) for further analyses. Here, we have not removed any cells from analysis, but removed the genes which have non-zero expressions in  $\leq 5$  cells to reduce the size of the data. Through this, we selected expression counts of 15,955 genes over 576 cells for further analysis. Further, for DE analysis, we took two cell lines (*i.e.*, NA19101 and NA19239) as two cellular groups. A brief description about this data is given in Table S1.

**C. *Soumillon Datasets*** ([www.ncbi.nlm.nih.gov/geo/query/acc.cgi?acc=GSE53638](http://www.ncbi.nlm.nih.gov/geo/query/acc.cgi?acc=GSE53638)): This dataset is publicly available from NCBI GEO database with Accession GSE53638 [3]. In this

study, cells were extracted during directed differentiation of human adipose-derived stem/stromal cells and further, 11, 116 cells are profiled by the authors of the original publication. Here, cells were collected at different stages and different time points (day 0, day 3 and day 7) of differentiation of human adipose-derived stem/stromal cells. FACS sorted cells were sequenced using the SCRB-seq protocol with UMI. To study the performance of scRNA-seq DE tools, we used two group comparison settings based on different time points, *i*) Data 1 (Day 0 (1245 cells, baseline) vs. Day 3 (590 cells), *ii*) Data 2 (Day 0 (1245 cells, baseline) vs. Day 7 (1023 cells), and *iii*) Data 3 (Day 7 (1023 cells, baseline) vs. Day 3 (590 cells). Here, we have not removed any cells from the analysis, and further removed the genes which have non-zero expressions in  $\leq 5$  cells. Through this process, we selected expression counts of 14863, 15637, and 15015 genes over 1835, 2268, 1613 cells for Soumillon Data 1, Data 2, and Data 3 respectively.

**D. Klein Data** ([www.ncbi.nlm.nih.gov/geo/query/acc.cgi?acc=GSE65525](http://www.ncbi.nlm.nih.gov/geo/query/acc.cgi?acc=GSE65525)): Klein data, mouse scRNA-seq count datasets, freely accessible from NCBI GEO database with accession id GSE65525 [4]. In this experiment, the mouse embryonic stem cells expressions were profiled through high throughput sequencing using a droplet-microfluidic approach. Here, the study includes 8 single cell datasets: 3 for mouse ES cells (1 biological replicate, 2 technical replicates); 3 samples following LIF withdrawal (days 2,4, 7); one pure RNA data set (from human lymphoblast K562 cells); and one sample of single K562 cells. We took the counts data, which are already undergone through several quality control steps by the authors of the original publication. Further, at the preliminary stage, we removed the cells whose library size is less than 1500 and also removed the genes which have non-zero expressions in  $\leq 5$  cells. Through this process, we selected expression counts of 23971 genes over 1481 cells for further analysis. Further, for DE



analysis, we took day 4 (cells 683) as group 1 and day 7 (798 cells) as group 2. A brief description about this data is given in Table S1.

**E. *Ziegenhain Data*** ([www.ncbi.nlm.nih.gov/geo/query/acc.cgi?acc=GSE75790](http://www.ncbi.nlm.nih.gov/geo/query/acc.cgi?acc=GSE75790)): This dataset is a publicly available scRNA-seq count data in NCBI GEO database with accession id GSE75790. In this experimental study, the single-cell datasets were generated for 583 mouse ES cells through six prominent scRNA-seq protocols, viz. CEL-seq2 (71), Drop-seq (76), MARS-seq (65), SCRB-seq (84), Smart-seq (130), and Smart-seq2 (157). Here, we considered the single-cell data generated for 287 cells through Smart-seq protocol as one cell group and the remaining cells (296) for which data is generated using other protocols is considered as another cellular group. This dataset contains expression counts of 39,016 transcripts over 583 cells. At the preliminary stage, we kept all those transcripts whose expression are non-zero counts in at least 30 cells. Through this process, we selected the single-cell expression count data of 15579 transcripts over 583 cells for further analysis. A brief description about this data is given in Table S1.

**F. *Grun data*** (<https://www.ncbi.nlm.nih.gov/geo/query/acc.cgi?acc=GSE54695>): This dataset is publicly available in NCBI GEO database with accession GSE54695. In this experimental study, the J1 mouse ES cells were cultured in 2i or in serum medium. Single cells were processed using the CEL-seq technique protocol. In this experiment, a 4bp random barcode as unique molecular identifier (UMI) was added to the primer in between the cell specific barcode and the poly T stretch. Libraries were sequenced on an Illumina HighSeq 2500 using 50bp paired end sequencing. For benchmarking scRNA-seq DE tools, we considered count dataset for J1 cells, as it has expressions of thousands of genes over hundreds of cells. Further, at the preliminary stage, we removed the cells whose library size is less than 1000 and also removed the genes which have non-zero expressions in  $\leq 20$  cells. Through this process, we selected expression counts of 11570

genes over 274 cells for further analysis. For performing DE analysis on this dataset, the cell group information is necessary, which is known here. Here, we considered those (152) cells, cultured in 2i medium, as one cellular group, and other (122) cells, cultured in serum medium, as another cellular group.

**G. Gierahn Data** (<https://www.ncbi.nlm.nih.gov/geo/query/acc.cgi?acc=GSE92495>): This dataset is publicly available in NCBI GEO database with accession id GSE92495 [5]. This experiment contains scRNA-seq dataset of Mouse and Human HEK/3T3 mixing, PBMCs, and TB-exposed cell Macrophages generated through Seq-Well, a portable, low-cost platform for single-cells. For benchmarking scRNA-seq DE tools, we considered count dataset for HEK cells, as it has expressions of thousands of genes over a large number of cells. Further, at the preliminary stage, we removed the cells whose library size is less than 1500 and also removed the genes which have non-zero expressions in  $\leq 5$  cells. Through this process, we selected expression counts of 15524 genes over 1453 cells for further analysis. For performing DE analysis on this dataset, the cell group information is necessary, which is unknown. Therefore, we used the clustering technique and methodology developed by Das et al. (2021) [6,7] to determine the optimum number of cell clusters for this data. For this purpose, we used the *OptimCluster* function implemented in SwarnSeq R package [6] to decide the number of optimum cell clusters. The results are shown in following Figure. Here, we set the seed value at 208 and, found that the 1453 cells are clustered into 8 optimum cell clusters. Further, for DE analysis, we took cell cluster 8 (cells 537) as group 1 and remaining cell clusters (916 cells) as group 2, as below shown Table. A brief description about this data is given in Table S1.

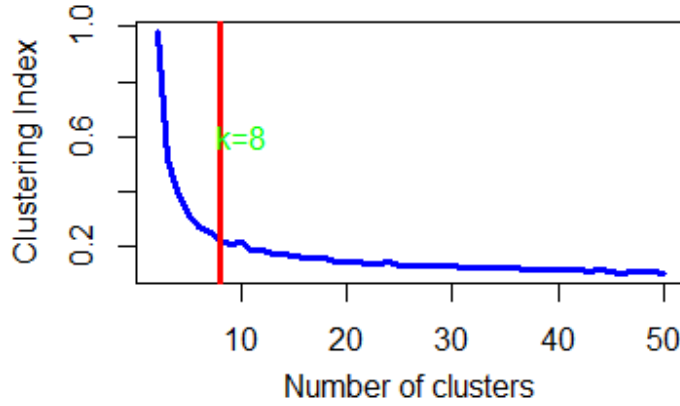

Choosing optimum number of cell clusters for Gierahn data.

The cell cluster and cellular group membership of the cells present in Gierahn dataset is shown in below mentioned Table.

**Table. Cell cluster and cell group information for Gierahn data.**

| Cell Clusters   | 1   | 2   | 3   | 4             | 5   | 6  | 7   | 8   |
|-----------------|-----|-----|-----|---------------|-----|----|-----|-----|
| Number of cells | 268 | 194 | 126 | 16            | 172 | 38 | 102 | 537 |
| Group 1 (916)   |     |     |     | Group 2 (537) |     |    |     |     |

**H. Chen data** (<https://www.ncbi.nlm.nih.gov/geo/query/acc.cgi?acc=GSE113660>): This data is available in GEO database with accession GSE113660. This scRNA-seq experiment was conducted over seven thousand two hundred cells from the Rh41 cell lines. For this study, we only collected the scRNA-seq UMI count datasets to analyze the tested methods. Here, we removed the cells whose library size  $< 15000$  and also removed the genes which have non-zero expressions in  $\leq 5$  cells. Through this process, we selected expression counts of 18406 genes over 6406 cells for further analysis. For DE analysis, the cell group information is necessary, which is unknown here. Therefore, we used the cluster analysis technique and methodology developed by Das et al. (2021) [6,7] to determine the optimum number of cell clusters for this data. We used the *OptimCluster* function implemented in SwarnSeq R package [6] to decide the number of optimum cell clusters.

The results are shown in following Figure. Here, we set the seed value at 208 and, found that the 6406 cells are clustered into 7 optimum cell clusters. Further, for DE analysis, we took cell clusters 6 and 7 (cells 2990) as group 2 and remaining cell clusters (3416 cells) as group 1, as shown in below Table. A brief description about this data is given in Table S1.

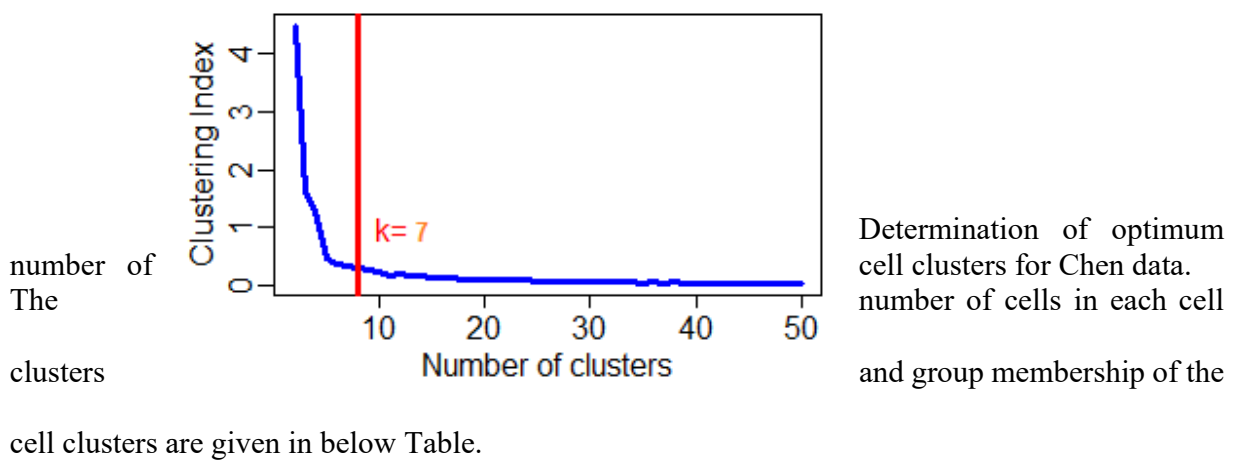

Cellular group and cellular clusters information for Chen data.

| Cell clusters   | 1   | 2   | 3   | 4    | 5  | 6              | 7   |
|-----------------|-----|-----|-----|------|----|----------------|-----|
| Number of cells | 169 | 393 | 990 | 1766 | 98 | 2201           | 789 |
| Group 1 (3416)  |     |     |     |      |    | Group 2 (2990) |     |

**I. Savas Data** ([https://www.ncbi.nlm.nih.gov/geo/query/acc.cgi?acc= GSE110686](https://www.ncbi.nlm.nih.gov/geo/query/acc.cgi?acc=GSE110686)): In this study, T cells were isolated from primary tumour tissues of two breast cancer patients. Single cells were captured from the sorted cells through the 10X Genomics Chromium System and libraries were sequenced using Illumina HiSeq 2500. Here, we collected the UMI and read count datasets from the single-cell and bulk RNA-seq to analyze the methods. At the preliminary stage, we removed the cells whose library size is less than 15000 and also removed the genes which have non-zero expressions in  $\leq 5$  cells. Through this, we selected expression counts of 12753 genes over

2903 cells for further analysis. As the cell group information is unknown, we used the cluster analysis technique (Supplementary Document S1) to determine the optimum number of cell clusters, which was implemented in *OptimCluster* function of SwarnSeq R package. Here, we found that the 2903 cells are clustered into 6 optimum cell clusters. Further, for DE analysis, we took cell cluster 6 (cells: 1290) as group 2 and remaining cell clusters (cells: 1613) as group 1. A brief description about this data is given in Table S1. The number of cells in each cell clusters are given in below mentioned Table.

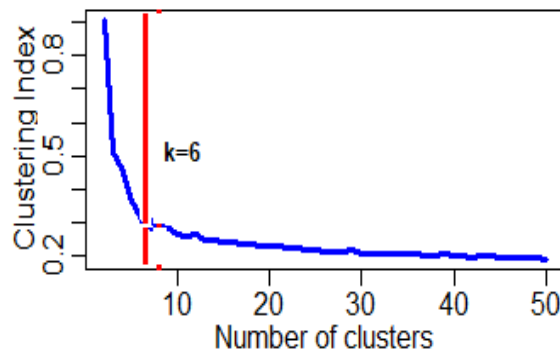

Determination of optimum number of cell clusters for Savas data.

Cell groups and cell clusters information for Savas data.

| Cell Clusters   | 1   | 2  | 3  | 4   | 5   | 7              | 6    |
|-----------------|-----|----|----|-----|-----|----------------|------|
| Number of cells | 266 | 58 | 40 | 192 | 844 | 213            | 1290 |
| Group 1 (1613)  |     |    |    |     |     | Group 2 (1290) |      |

## **Document S2: Selection of reference genes for single-cell studies**

To capture the real distributional of the single-cell data, we assessed the performance of the tested methods on 11 different publicly available real scRNA-seq UMI counts datasets having cells ranging from few hundreds to several thousands (Table S1). These datasets are briefly described in Document S1. Therefore, such an approach of performance evaluation was capable

of taking the biological ground truth of real DE genes for the benchmarking of performance the tested methods. However, it is more complicated to obtain the available list of real true DE genes for each of the considered dataset. To tackle this problem, we selected few known biological relevant datasets, such as Microarrays, bulk RNA-seq, to get the list of reference DE genes for which single-cell RNA-seq datasets are available for the same cell-lines. The detail procedure for obtaining the reference genes for each of the 11 considered real datasets to validate the performance of the tested methods is described as below.

***Islam Data (GSE29087):*** For this dataset, we obtained the reference DE genes (the same cell lines for which single-cell dataset was generated) from the Microarray dataset. Further, we collected the Microarray datasets available for the mouse Embryonic Stem (ES) cell types (class label: 1), and Embryonic Fibroblasts (EF) cell types (class label: -1). This dataset is publicly available at [http://carlosibanezlab.se/Data/Moliner\\_CELfiles.zip](http://carlosibanezlab.se/Data/Moliner_CELfiles.zip) [8]. We used the Support Vector Machine-Recursive Feature Elimination (SVM-RFE) [9] to select the genes, which are differentially expressed between the ES and EF cell lines from the Microarray expression data and assumed these selected differentially expressed genes as reference genes for benchmarking the tested methods. The SVM-RFE is a machine learning algorithm, widely used for informative gene selection in Microarray data analysis and has superior performance compared to other gene selection methods, as established in the previous study [10]. Through the SVM-RFE, the top-ranked 3000 genes were selected and considered as the reference genes for performance analysis of the scRNA-seq DE methods.

***Tung data (GSE77288):*** For this single-cell dataset, we obtained the reference DE genes (for the NA19101 and NA19239 cell lines) from the relevant bulk RNA-seq data. This bulk RNA-seq data, generated for the NA19101 and NA19239 cell lines, is publicly available at

<https://github.com/jdblischak/singleCellSeq>. Here, we used the SAMseq tool [11] to select the differentially expressed between the NA19101 and NA19239 cell lines from the bulk RNA-seq count data and assumed these selected differentially expressed genes as reference genes for benchmarking the tested methods. The rationale behind using SAMseq technique is that it is based on non-parametric statistical approach and does not depend on the distributional nature of the data [11]. Through this tool, we selected the top ranked 3000 genes as reference genes for benchmarking the performance of the 19 tested single-cell methods (Tables S2, S3).

***Savas data (GSE110686):*** For Savas single-cell data, we collected the bulk RNA-seq count datasets for the corresponding cell lines from GEO database of NCBI with accession id GSE110938. Here, we used the SAMseq tool [11] to select the differentially expressed between the CD8+CD103+ and CD8+CD103- FACS sorted populations. Through this tool, we selected the top ranked 3000 genes as reference genes for benchmarking the performance of the 19 tested single-cell methods (Tables S2, S3).

***Other scRNA-seq datasets:*** For the remaining eight single-cell datasets, we selected the reference genes from these data itself. Hence, to obtain the list of reference genes, we used Fold Change (FC) criterion (*i.e.*, ratios of mean expressions of genes over the two cellular groups, as given in Table S1). The detailed descriptions about the identification of cellular groups for each of the remaining eight datasets including Soumillon Datasets (Data 1, 2, and 3), Klein Data, Ziegenhain Data, Grun data, Gierahn Data, and Chen data is described in Supplementary Document S10. For each of the dataset, we selected the top 3000 genes based on the FC criterion as reference gene lists. It is important to note that the selection of reference genes from these datasets is completely independent of the detection of DE genes through the tested DE methods.

The selection of reference genes through FC criterion provides an equal platform for the comparative analysis of the 19 tested methods on each of the datasets.

**Table S1.** Filtered scRNA-seq datasets along with used in this study.

| Sl. No. | Data        | scRNA Accession | Ref. genes   | Filtering  | #Cells* | #Genes* | #Cells in G1 | #Cells in G2 |
|---------|-------------|-----------------|--------------|------------|---------|---------|--------------|--------------|
| 01      | Tung        | GSE77288        | Bulk RNA-seq | (5, 1000)  | 576     | 15955   | 288          | 288          |
| 02      | Islam       | GSE29087        | Microarrays  | (5, 1000)  | 92      | 11436   | 48           | 44           |
| 03      | Soumillon 1 | GSE53638        | scRNA-seq    | (5, 1000)  | 1835    | 12289   | 1245         | 590          |
| 04      | Soumillon 2 | GSE53638        | scRNA-seq    | (5, 1000)  | 2268    | 15637   | 1245         | 1023         |
| 05      | Soumillon 3 | GSE53638        | scRNA-seq    | (5, 1000)  | 1613    | 15015   | 590          | 1023         |
| 06      | Klein       | GSE65525        | scRNA-seq    | (5, 1500)  | 1481    | 23971   | 683          | 798          |
| 07      | Gierahn     | GSE92495        | scRNA-seq    | (4, 1000)  | 1453    | 15996   | 916          | 537          |
| 08      | Chen        | GSE113660       | Bulk RNA-seq | (5, 15000) | 6406    | 18406   | 3416         | 2990         |
| 09      | Savas       | GSE110686       | Bulk RNA-seq | (5, 15000) | 2903    | 12753   | 1613         | 1290         |
| 10      | Grun        | GSE54695        | scRNA-seq    | (20, 1000) | 274     | 11570   | 152          | 122          |
| 11      | Ziegenhain  | GSE75790        | scRNA-seq    | (30, 1000) | 583     | 15579   | 296          | 287          |

#Cells\*, #Genes\* are the number of cells and genes in the scRNA-seq data after data pre-processing; #Cells in G1: number of cells in group 1; #Cells in G2: number of cells in group 2; Filtering: (x, y) Filtering parameters, where x represents the number of non-zero counts for each gene removed, y represents the cell size threshold; Ref. genes: GEO datasets from which reference genes are derived.



## **Document S3: Count data models**

### ***a. Negative Binomial Distribution***

Most of the popular Differential Expression (DE) analysis tools, *e.g.* DESeq [12], DESeq2 [13], edgeR [14], *etc.*, for bulk RNA-sequencing (RNA-seq) study assume the RNA-seq read counts to follow a Negative Binomial (NB) distribution, and subsequently, DE analysis is performed under Generalized Linear Model (GLM) framework.

Let,  $Y_{ij}$ : random variable (*rv*) representing the RNA-seq read counts of  $i^{th}$  ( $i = 1, 2, \dots, N$ ) gene of  $j^{th}$  ( $j = 1, 2, \dots, M$ ) cell;  $\mu_{ij}$ : mean of  $i^{th}$  gene of  $j^{th}$  cell in  $i^{th}$  cell;  $\theta_{ij}$  ( $= \varphi_{ij}^{-1}$ ) and  $\varphi_{ij}$ : size and dispersion parameters respectively of  $i^{th}$  gene in  $j^{th}$  cell for NB distribution.

Further, the Probability Mass Function (PMF) of the NB distribution is expressed as:

$$f_{NB}(y) = P[Y_{ij} = y] = \frac{G(y + \theta_{ij})}{G(y + 1)G(\theta_{ij})} \left( \frac{\theta_{ij}}{\theta_{ij} + \mu_{ij}} \right)^{\theta_{ij}} \left( \frac{\mu_{ij}}{\theta_{ij} + \mu_{ij}} \right)^y \quad \forall y = 0, 1, 2, \dots \quad (1)$$

where,  $\mu_{ij} \geq 0$ ;  $\theta_{ij} > 0$  are the parameters of NB distribution,  $G(\cdot)$ : Gamma function. Then, the expected value and variance of  $Y_{ij}$  is shown as:

$$E(Y_{ij}) = \mu_{ij} \quad (2)$$

$$V(Y_{ij}) = \mu_{ij} + \frac{\mu_{ij}^2}{\theta_{ij}} = \mu_{ij} + \varphi_{ij} \quad (3)$$

If  $\varphi_{ij} \rightarrow 0$  (*No dispersion*)  $\Rightarrow NB(\mu_{ij}, \theta_{ij}) \rightarrow Poisson(\mu_{ij})$

### ***b. Zero Inflated Negative Binomial Model***

The proportions of zeros in single cell RNA-sequencing (scRNA-seq) data are higher as compared to bulk RNA-seq data due to low efficiency of mRNA capture efficiency, lower abundance of transcriptomics in single cell, amplification bias, *etc.* Therefore, the application of NB based bulk RNA-seq DE tools leads to several technical problems including lower statistical power to detect

DE genes in scRNA-seq studies [15,16]. So, specialized scRNA-seq DE tools, *e.g.* ZINB-Wave [17], DEsingle [18], DECENT [19], etc. are developed based on the assumption that the observed scRNA-seq read counts follow a Zero Inflated Negative Binomial (ZINB) Distribution.

Let,  $Y_{ij}$ : *rv* representing the read (UMI) counts in scRNA-seq data of  $i^{th}$  ( $i = 1, 2, \dots, N$ ) gene of  $j^{th}$  ( $j = 1, 2, \dots, M$ ) cell;  $\mu_{ij}$ : mean of  $i^{th}$  gene of  $j^{th}$  cell in  $i^{th}$  cell;  $\theta_{ij}$  ( $= \varphi_{ij}^{-1}$ ) and  $\varphi_{ij}$ : size and dispersion parameters respectively of  $i^{th}$  gene in  $j^{th}$  cell for NB distribution;  $\pi_{ij}$ : zero inflation (*i.e.* the probability for a count to be an excess zero in a cell) parameter for  $i^{th}$  gene of  $j^{th}$  cell.

For any  $\pi_{ij} \in [0, 1]$ ,  $Y_{ij}$  is assumed to follow a ZINB distribution [15,18,19]. The PMF of the ZINB Distribution expressed as follows.

$$f_{ZINB}(y) = P[Y_{ij} = y] = \pi_{ij}\delta_0(y) + (1 - \pi_{ij})f_{NB}(y) \quad \forall y = 0, 1, 2, \dots \quad (4)$$

where,  $f_{NB}(\cdot)$ : PMF of NB distribution (Eq. 1);  $\delta_0(\cdot)$ : Dirac's delta function. Here,  $\delta_0(\cdot)$  used to model the excess zeros in the data, and its PMF is expressed as:

$$\delta_0(Y_{ij} = y) = \begin{cases} 1; & y = 0 \\ 0; & y \neq 0 \end{cases} \quad (5)$$

Now, the PMF of the ZINB distribution to model the read counts from scRNA-seq data is given in Eq. 6.

$$P[Y_{ij} = y] = \begin{cases} \pi_{ij} + (1 - \pi_{ij})\left(\frac{\theta_{ij}}{\theta_{ij} + \mu_{ij}}\right)^{\theta_{ij}k} & \text{when } y = 0 \\ (1 - \pi_{ij})\frac{G(y + \theta_{ij})}{G(y + 1)G(\theta_{ij})}\left(\frac{\theta_{ij}}{\theta_{ij} + \mu_{ij}}\right)^{\theta_{ij}k}\left(\frac{\mu_{ij}}{\theta_{ij} + \mu_{ij}}\right)^y & ; y > 0 \end{cases} \quad (6)$$

Now,  $Y_{ij} \sim ZINB(\pi_{ij}, \mu_{ij}, \theta_{ij})$ , then the expected value and variance of  $Y_{ij}$  can be obtained as follows:

$$E(Y_{ij}) = (1 - \pi_{ij})\mu_{ij} \quad (7)$$

$$V(Y_{ij}) = (1 - \pi_{ij})\mu_{ij}\left(1 + \pi_{ij}\mu_{ij} + \frac{\mu_{ij}}{\theta_{ij}}\right) \quad (8)$$

If  $\pi_{ij} = 0 \Rightarrow ZINB(\pi_{ij}, \mu_{ij}, \theta_{ij}) \rightarrow NB(\mu_{ij}, \theta_{ij})$

If  $\phi_{ij} \rightarrow 0$  (No dispersion)  $\Rightarrow ZINB(\pi_{ij}, \mu_{ij}, \theta_{ij}) \rightarrow ZIP(\pi_{ij}, \mu_{ij})$

### c. Poisson Distribution

Poisson Distributions (PD) are also extensively used for analysis of count data obtained from bulk RNA-seq or scRNA-seq experiments. The PMF of PD can be expressed as:

$$f_{PD}(y) = P[Y_{ij} = y] = \frac{e^{-\mu_{ij}} \mu_{ij}^y}{G(y+1)} \quad \forall y = 0, 1, 2, \dots \quad (9)$$

$$E(Y_{ij}) = Var(Y_{ij}) = \mu_{ij} \quad (10)$$

### d. Zero Inflated Poisson Distribution (ZIPD)

Poisson model has very strict assumptions, *i.e.*, mean equals the variance, which is often violated in scRNA-seq data analysis. When the variance is too large because there are many 0s as well as a few very high values for expression counts [20]. In this case, a better solution is often the ZIPD model.

The PMF of ZIPD distribution can be expressed as:

$$f_{ZIPD}(y) = P[Y_{ij} = y] = \pi_{ij}I(y = 0) + (1 - \pi_{ij})f_{PD}(y) \quad \forall y = 0, 1, 2, \dots \quad (11)$$

$$= \begin{cases} \pi_{ij} + (1 - \pi_{ij})e^{\mu_{ij}} & \text{when } y = 0 \\ (1 - \pi_{ij}) \frac{e^{-\mu_{ij}} \mu_{ij}^y}{G(y+1)}; & y > 0 \end{cases} \quad (12)$$

The mean and variance of ZIPD model is shown in Eq. 13 and 14, respectively.

$$E(Y) = (1 - \pi_{ij})\mu_{ij} \quad (13)$$

$$Var(Y) = (1 - \pi_{ij})\mu_{ij}(1 + \pi_{ij}\mu_{ij}) \quad (14)$$

### e. Hermite Distribution

Hermite Distribution (HD) can be used to model the counts data [21]. Further, the PMF of HD is given in Eq. 15.

$$f_{HD}(Y_{ij} = y | \alpha_{ij}, \beta_{ij}) = e^{-(\alpha_{ij} + \beta_{ij})} \sum_{k=0}^{\lfloor \frac{y}{2} \rfloor} \frac{\alpha_{ij}^{y-2k} \beta_{ij}^k}{G(y-2k+1)G(k+1)} \quad \forall y = 0, 1, 2, \dots \quad (15)$$

Further, the mean, variance, and dispersion index (*i.e.*, ratio between variance and mean) of rv  $Y_{ij} \sim \text{HD}(\alpha, \beta)$  is given in Eq. 16 – 18.

$$E(Y_{ij}) = f(\alpha_{ij}, \beta_{ij}) = (\alpha_{ij} + 2\beta_{ij}) \quad (16)$$

$$\text{Var}(Y_{ij}) = (\alpha_{ij} + 4\beta_{ij}) \quad (17)$$

$$\varphi = g(\alpha_{ij}, \beta_{ij}) = 1 + 2\beta_{ij}/(\alpha_{ij} + 2\beta_{ij}) \quad (18)$$

The good-ness of fit of the above count data models, shown in Eq. 1, 6, 9, 12 and 15, were assessed through Akaike Information (AIC) and Bayesian Information (BIC) Criteria. The formula for AIC and BIC is expressed in Eq. 19 and 20.

$$AIC_m = -2\log L_m + 2P_m \quad (19)$$

$$BIC_m = -2\log L_m + P_m \log(M) \quad (20)$$

where,  $L_m$ : Likelihood function for  $m^{th}$  model;  $P_m$ : Number of parameters in  $m^{th}$  model;  $AIC_m$  and  $BIC_m$ : AIC and BIC values for  $m^{th}$  model;  $M$ : Total number of cells in the data.

## **Document S4. Normalization methods in scRNA-seq data analysis**

### ***a. Trimmed mean of M-values (TMM) Method***

TMM normalization method originated from edgeR [22] to normalize the read (UMI) counts data. The details about the TMM can be found in Robinson and Oshlack, 2010 [23]. It deals with calculation of effective libraries sizes, which are then used as part of the per-sample normalization.

TMM normalization adjusts library sizes based on the assumption that most genes are not differentially expressed. Therefore, it is important not to make subsets of the count data before doing statistical analysis or visualization, as this can lead to differences being normalized away.

### Algorithm

- 'log CPM' (Counts per Million) values are calculated for each gene. The CPM calculation uses the effective library sizes as calculated by the TMM normalization.
- After this first normalization, a second one is performed across samples for each gene: the counts for each gene are mean centered and scaled to unit variance.
- Genes or transcripts with zero expression across all samples or invalid values (NaN or +/- Infinity) are removed.

### *b. DESeq.norm Method*

Modified median normalization method originated from DESeq to normalize the read (UMI) counts data. Let  $Y_{ij}$  denote the read counts of  $i^{th}$  gene in  $j^{th}$  cell, then the size factor of  $j^{th}$  cell is estimated by as follows:

$$\hat{S}_j = \text{median}_i \frac{Y_{ij}}{(\prod_{v=1}^M Z_{iv})^{1/M}} \quad (21)$$

where,  $Y_{ij} \neq 0$  namely only the non-zero read counts of each gene are used. Finally, the normalized read counts of  $i^{th}$  gene in  $j^{th}$  cell were computed through Eq. 40.

$$Y_{ij}^{norm} = \frac{Y_{ij}}{\hat{S}_j} \quad (22)$$

**Document S5:** List of the methods and tools used in the comparative study.

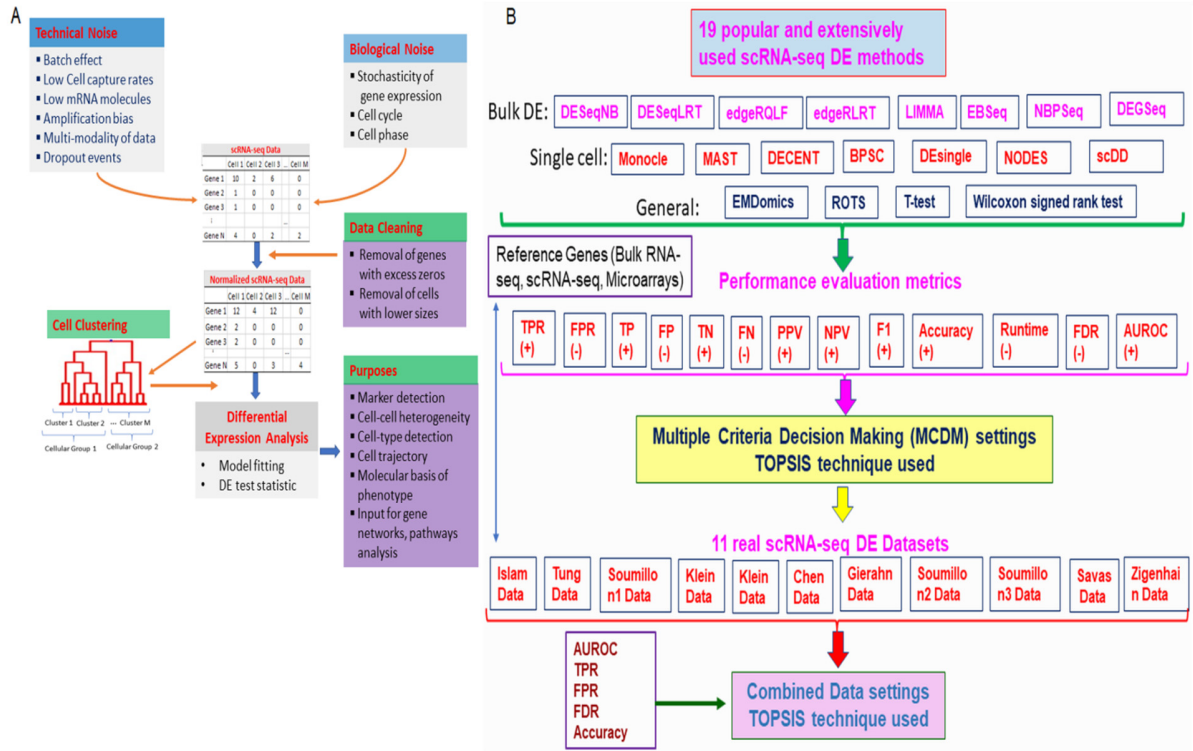

**Figure S1. Schematic overview and layout of scRNA-seq DE analysis.** (A) Schematic overview of the scRNA-seq DE analysis; (B) Layout of the comparative analysis of the DE tools used in this study. scRNA-seq data are inherently noisy with confounding factors, attributed as technical and biological source of variations. After sequencing, alignment and de-duplication are performed to quantify an initial gene expression profile matrix. Next, normalization is performed with raw expression data using various statistical methods to remove the amplification bias. Additional quality check can be performed when using spike-ins by inspecting the mapping ratio to discard low-quality cells. Finally, the normalized matrix is then subjected to main analysis through clustering of cells to identify subtypes. Cell trajectories can be inferred based on these data and by detecting differentially expressed genes between clusters. The identified genes can be further to unravel the biological processes of the underlying complex phenotypes through gene and cell-level analyses, as mentioned in Figure S1A.

**Table S2. ScRNA-seq DE Tools details used in this study and their availability.**

| SN. | Methods  | Year | R package | Version | Availability                                                                                                                                  | Ref. |
|-----|----------|------|-----------|---------|-----------------------------------------------------------------------------------------------------------------------------------------------|------|
| 01  | DESeqNB  | 2010 | DESeq     | 1.39.0  | <a href="https://bioconductor.org/packages/release/bioc/html/DESeq.html">https://bioconductor.org/packages/release/bioc/html/DESeq.html</a>   | [24] |
| 02  | DESeqLRT | 2014 | DESeq2    | 1.28.1  | <a href="http://bioconductor.org/packages/release/bioc/html/DESeq2.html">http://bioconductor.org/packages/release/bioc/html/DESeq2.html</a>   | [13] |
| 03  | DEGSeq   | 2009 | DEGseq    | 1.42.0  | <a href="https://bioconductor.org/packages/release/bioc/html/DEGseq.html">https://bioconductor.org/packages/release/bioc/html/DEGseq.html</a> | [25] |
| 04  | LIMMA    | 2002 | limma     | 3.44.1  | <a href="https://bioconductor.org/packages/release/bioc/html/limma.html">https://bioconductor.org/packages/release/bioc/html/limma.html</a>   | [26] |

|    |          |      |          |            |                                                                                                                                                           |      |
|----|----------|------|----------|------------|-----------------------------------------------------------------------------------------------------------------------------------------------------------|------|
| 05 | ROTS     | 2016 | ROTS     | 1.16.0     | <a href="https://www.bioconductor.org/packages/release/bioc/html/ROTS.html">https://www.bioconductor.org/packages/release/bioc/html/ROTS.html</a>         | [27] |
| 06 | edgeRLRT | 2010 | edgeR    | 3.30.3     | <a href="https://bioconductor.org/packages/release/bioc/html/edgeR.html">https://bioconductor.org/packages/release/bioc/html/edgeR.html</a>               | [14] |
| 07 | edgeRQLF | 2010 | edgeR    | 3.30.3     | <a href="https://bioconductor.org/packages/release/bioc/html/edgeR.html">https://bioconductor.org/packages/release/bioc/html/edgeR.html</a>               | [14] |
| 08 | NBSeq    | 2011 | NBPSeg   | 0.3.0      | <a href="https://cran.rstudio.com/web/packages/NBPSeg">https://cran.rstudio.com/web/packages/NBPSeg</a>                                                   | [28] |
| 09 | EBSeq    | 2013 | EBSeq    | 1.28.0     | <a href="https://www.bioconductor.org/packages/release/bioc/html/EBSeq.html">https://www.bioconductor.org/packages/release/bioc/html/EBSeq.html</a>       | [29] |
| 10 | T-test   | 1947 | stats    | 4.0.2      | <a href="https://cran.r-project.org/web/packages/STAT/index.html">https://cran.r-project.org/web/packages/STAT/index.html</a>                             | [30] |
| 11 | Wilcox   | 1945 | stats    | 4.0.2      | <a href="https://cran.r-project.org/web/packages/STAT/index.html">https://cran.r-project.org/web/packages/STAT/index.html</a>                             | [31] |
| 12 | Monocle  | 2017 | monocle  | 2.16.0     | <a href="http://www.bioconductor.org/packages/release/bioc/html/monocle.html">www.bioconductor.org/packages/release/bioc/html/monocle.html</a>            | [32] |
| 13 | MAST     | 2015 | MAST     | 1.14.0     | <a href="https://github.com/RGLab/MAST">https://github.com/RGLab/MAST</a>                                                                                 | [33] |
| 14 | scDD     | 2016 | scDD     | 1.12.0     | <a href="https://www.bioconductor.org/packages/release/bioc/html/scDD.html">https://www.bioconductor.org/packages/release/bioc/html/scDD.html</a>         | [34] |
| 15 | DEsingle | 2018 | DEsingle | 1.8.2      | <a href="https://www.bioconductor.org/packages/release/bioc/html/DEsingle.html">https://www.bioconductor.org/packages/release/bioc/html/DEsingle.html</a> | [18] |
| 16 | DECENT   | 2019 | DECENT   | 1.1.0      | <a href="https://github.com/cz-ye/DECENT">https://github.com/cz-ye/DECENT</a>                                                                             | [19] |
| 17 | BPSC     | 2016 | BPSC     | 0.99.2     | <a href="https://github.com/nghiavtr/BPSC">https://github.com/nghiavtr/BPSC</a>                                                                           | [35] |
| 18 | NODES    | 2016 | NODES    | 0.0.0.9010 | <a href="https://goo.gl/Ndx07M">https://goo.gl/Ndx07M</a>                                                                                                 | [36] |
| 19 | EMDomics | 2016 | EMDomics | 2.18.0     | <a href="https://www.bioconductor.org/packages/release/bioc/html/EMDomics.html">https://www.bioconductor.org/packages/release/bioc/html/EMDomics.html</a> | [37] |

SN.: Serial Number; Parameters: Parameter settings used for analysis; Approach: Type of approach based on the underlying assumptions of the models; Year: Year of first release of the tool; Version: Latest version of the R package used in this study; Wilcox: Wilcox signed rank test

**Table S3.** List of the scRNA-seq DE methods along with the parameters used in this comparative study.

| SN. | Methods  | Parameters                                    | Approach       | DE Stat.        | Run time | Utility | Ref. |
|-----|----------|-----------------------------------------------|----------------|-----------------|----------|---------|------|
| 01  | DESeqNB  | Defaults                                      | Parametric     | NB test         | Minutes  | Bulk    | [24] |
| 02  | DESeqLRT | Defaults                                      | Parametric     | LRT             | Minutes  | Bulk    | [13] |
| 03  | DEGSeq   | Method="LRT"                                  | Parametric     | Z-test          | Minutes  | Bulk    | [25] |
| 04  | LIMMA    | Linear model                                  | Parametric     | Wald test       | Minutes  | Bulk    | [26] |
| 05  | ROTS     | B = 1000, K = 6000                            | Non-Parametric | Z-test          | Hours    | Bulk    | [27] |
| 06  | edgeRLRT | Defaults                                      | Parametric     | LRT             | Minutes  | Bulk    | [14] |
| 07  | edgeRQLF |                                               | Parametric     | QLF             | Minutes  | Bulk    | [14] |
| 08  | NBSeq    | model.disp = "NBQ"                            | Parametric     | Exact test      | Minutes  | Bulk    | [28] |
| 09  | EBSeq    | sizeFactors = MedianNorm(.),<br>maxround = 50 | Parametric     | Posterior prob. | Hours    | Bulk    | [29] |
| 10  | T-test   | alternative = "two.sided",                    | Parametric     | t-stat.         | Seconds  | Gen     | [30] |

|    |          |                                                                                                            |                |                  |         |             |      |  |
|----|----------|------------------------------------------------------------------------------------------------------------|----------------|------------------|---------|-------------|------|--|
|    |          | paired = FALSE,<br>var.equal = FALSE<br>alternative = "two.sided",<br>paired = FALSE,<br>var.equal = FALSE |                |                  |         |             |      |  |
| 11 | Wilcox   |                                                                                                            | Non-Parametric | M-W stat         | Seconds | Gen         | [31] |  |
| 12 | Monocle  | UMI=T, cores = n.cores, verbose = T                                                                        | Parametric     | LRT              | Minutes | Single cell | [32] |  |
| 13 | MAST     | Defaults                                                                                                   | Parametric     | LRT              | Minutes | Single cell | [33] |  |
| 14 | scDD     | alpha=0.01, mu0=0, s0=0.01, a0=0.01, b0=0.01, UMI=T                                                        | Parametric     | Bayesian stat.   | Minutes | Single cell | [34] |  |
| 15 | DEsingle | parallel = FALSE, Defaults                                                                                 | Parametric     | LRT              | Hours   | Single cell | [18] |  |
| 16 | DECENT   | use.spikes = F, CE.range = c(0.02, 0.1), parallel = FALSE                                                  | Parametric     | LRT              | Days    | Single cell | [19] |  |
| 17 | BPSC     | coef=2, estIntPar=FALSE                                                                                    | Parametric     | Z-test           | Hours   | Single cell | [35] |  |
| 18 | NODES    | r = 20, smooth_points = 10000, zper = 0.5                                                                  | Non-Parametric | Wilcoxon         | Minutes | Single cell | [36] |  |
| 19 | EMDomics | nperm = 100, pairwise.p = TRUE, parallel=FALSE                                                             | Non-Parametric | Distance measure | Hours   | Single cell | [37] |  |

SN.: Serial Number; Parameters: Parameter settings used for analysis; Approach: Type of approach based on the underlying assumptions of the models; Year: Year of first release of the tool; Version: Latest version of the R package used in this study.

**Table S4.** List of the criteria used for comparative performance analysis of the scRNA-seq DE methods.

| Sl. No. | Symbol | Criteria                                    | Impact     |
|---------|--------|---------------------------------------------|------------|
| 01      | C1     | True Positive (TP)                          | +          |
| 02      | C2     | False Positive (FP)                         | -          |
| 03      | C3     | True Negative (TN)                          | +          |
| 04      | C4     | False Negative (FN)                         | -          |
| 05      | C5     | True Positive Rate (TPR)                    | +          |
| 06      | C6     | False Positive Rate (FPR)                   | -          |
| 07      | C7     | False Discovery Rate (FDR)                  | -          |
| 08      | C8     | Positive Prediction Rate (PPR)              | +          |
| 09      | C9     | Negative Prediction Value (NPV)             | +          |
| 10      | C10    | F1 Score                                    | +          |
| 11      | C11    | Accuracy                                    | +          |
| 12      | C12    | Area under Receiver Operating Curve (AUROC) | +          |
| 13      | C13    | Run Time                                    | -          |
| 14      | C14    | Multiple Criteria Decision-Making setup     | All C1-C13 |

C1-C13: symbols of the criteria

The expressions for these criteria are given in the main text of the manuscript (Eq. 30–37). The impact of the criteria on performance of the tested methods (Tables S2, S3) are shown as “+” and



“-”. Here, the “+” indicates the criteria has positive impact, means higher the values of the criteria better are that method and *vice-versa*. Further, “-” indicates that higher value of the criteria has negative impact on the performance of the tested methods and *vice-versa*. In other words, “+” represents higher the value of the criterion, better is the method and *vice-versa*; “-” in impact represents lower the value of the criterion, better is the method and *vice-versa*. The positive impact criteria are {C1, C3, C5, C8, C9, C10, C11, C12} and the negative impact criteria are {C2, C4, C6, C7, C13}. Under the individual criterion-centric performance evaluation, the performance of the tested methods is evaluated based on the criterion (C1-C13) separately. Furthermore, under Multiple Criteria Decision-Making (MCDM) setting, all the criteria are considered simultaneously for performance analysis of the tested methods, given in Tables S2 and S3.

**Document S6. Comparative performance analysis of the tested methods using TOPSIS technique under Multiple Criteria Decision-Making setup.**

Multiple Criteria decision-making (MCDM) is a sub-discipline of operations research that explicitly evaluates multiple conflicting criteria in decision making. Conflicting criteria are typical in evaluating options: runtime (C13) or error rate (C7) or Accuracy (C11) are usually considered to evaluate the performance of the DE methods. In selecting a best method, Accuracy (C11), AUROC (C12), FDR (C7) may be some of the main criteria usually considered in single-cell studies. In DE analysis, researchers are more interested finding the DE methods with higher accuracy while simultaneously reducing error and computational time. In a typical analysis, researcher may be interested in a method with higher accuracy and lower computational time required, which are fundamentally conflicting criteria.

Therefore, in making the decision of selecting the best method for DE analysis of scRNA-seq data, it is pertinent to undertake the performance analysis of the tested methods under the

simultaneous consideration of all the conflicting criteria. Here, we emphasized to comparative performance analysis of the 19 methods under the simultaneous consideration of all the 13 criteria (Table S6). In operational research, such a performance evaluation setting is called as MCDM setup [38], where the main idea is to consider a set of criteria and choose the best performing method over a list of methods [39]. Under this MCDM set up, Technique for Order Performance by Similarity to Ideal Solution (TOPSIS) [40] has been extensively [41]. However, we used this approach for the first time in single-cell data analytics. Here, the basic idea is to choose the best method out of the 19 tested methods based on the simultaneous consideration of the 13 decision criteria (Table S6). Through TOPSIS, it is expected that the best identified method should have shortest geometric distance from the positive ideal solution (PIS) and the longest geometric distance from the negative ideal solution (NIS) [42]. The detailed method and major analytical steps for the MCDM-TOPSIS analysis are given as follows.

Let  $U$  be the resultant decision matrix used under MCDM setup, *i.e.*,  $U = ((u_{rs}))$ , where  $u_{rs}$  represents the value of  $M_r$  ( $r^{th}$  method) ( $r = 1, 2, \dots, 19$ ) under  $C_s$  ( $s^{th}$  decision criteria) ( $s = 1, 2, \dots, 13$ ) and  $W_s$  's are the criteria weights indicate the relative importance among them. Further, the  $W_s$  are calculated using the entropy technique through the following steps.

**Step 1:** Normalization of the decision matrix ( $U$ ): The resulted values in  $U$  are first transformed to normalized values ( $P_{rs}$ ) through using Eq. 23.

$$P_{rs} = u_{rs} / \sum_{r=1}^{19} u_{rs} \quad (23)$$

**Step 2:** Calculation of entropy measure ( $E_s$ ) for  $s^{th}$  criterion is calculated using Eq. 24

$$E_s = -a \sum_{r=1}^{13} P_{rs} \ln (P_{rs}) \quad (24)$$

where  $a = 1/\ln 19$ . Further, the degree of diversity ( $D_s$ ) for  $s^{th}$  criterion is computed using Eq. 25.

$$D_s = 1 - E_s \quad (25)$$

**Step 3:** Calculation of weights ( $W_s$ ) for each criterion:  $W_s$  are computed for  $s^{th}$  criterion through using Eq. 26.

$$W_s = D_s / \sum_{s=1}^{13} D_s \quad (26)$$

After obtaining criteria weights, they are incorporated in the usual TOPSIS technique to calculate the overall scores for each tested method. The major steps for the TOPSIS technique in this context are briefly given as:

[1] Construct the normalized decision matrix ( $Z$ ) by vector normalization using Eq. 27.

$$z_{rs} = u_{rs} / \sum_r u_{rs}^2 \quad (27)$$

[2] Calculate weighted normalized decision matrix using:

$$v_{rs} = W_s \times z_{rs} \quad (28)$$

[3] Determine the PIS,  $V^+$ , and NIS,  $V^-$ , by using Eq. 29 and 30.

$$V^+ = \{V_1^+, V_2^+, \dots, V_s^+\} = \{\langle \max(v_{rs} | r = 1, 2, \dots, 19) | s \in C_+ \rangle, \langle \min(v_{rs} | r = 1, 2, \dots, 19) | s \in C_+ \rangle\} \quad (29)$$

$$V^- = \{V_1^-, V_2^-, \dots, V_s^-\} = \{\langle \max(v_{rs} | r = 1, 2, \dots, 19) | s \in C_- \rangle, \langle \min(v_{rs} | r = 1, 2, \dots, 19) | s \in C_- \rangle\} \quad (30)$$

where  $C_+ = \{s = 1, 2, \dots, 8 | s \text{ associated with the criteria having a positive impact and } C_- = \{s = 1, 2, \dots, 5 | s \text{ associated with the criteria having a negative impact.}$

[4] Calculate the  $L_2$  distance for PIS ( $d_r^+$ ) and NIS ( $d_r^-$ ) using:

$$d_r^+ = (\sum_{s=1}^8 (v_{rs} - V_s^+)^2)^{1/2} \quad (31)$$

$$d_r^- = (\sum_{s=1}^5 (v_{rs} - V_s^-)^2)^{1/2} \quad (32)$$

[5] Determine the relative closeness of the tested method to the ideal solution using Eq. 33.

$$R_r = \frac{d_r^-}{d_r^- + d_r^+} \quad \forall r = 1, 2, \dots, 19 \quad (33)$$

Through Eq. 33, the methods with higher  $R_r$  ( $0 \leq R_r \leq 1$ ) are preferred and considered as better over the multiple criteria and *vice-versa*.

### **Document S7: Testing for zero-inflation parameters for genes in scRNA-seq data**

Here, we assume that the UMI (read) counts of the genes from a scRNA-seq study are generated through a ZINB population model given in Eq. 4 and 6. In order to test the statistical significance of the zero inflation parameters of  $i^{th}$  gene  $\pi_i$  of the ZINB model, we adopt the following Generalized Likelihood Ratio Test (GLRT) procedure. Here, for the testing purpose, we define the following null hypothesis.

$$H_0: \pi_i = 0 \text{ vs. } H_1: \pi_i \neq 0$$

where,  $H_0$ : null hypothesis;  $H_1$ : alternate hypothesis. In other words, null hypothesis tells us that  $k^{th}$  gene is not zero inflated, and subsequently, the scRNA-seq data structure is same as RNA-seq data. Further, if we fail to reject  $H_0$ , then the RNA-seq DE tools can be used for DE analysis of scRNA-seq data with the expectation of satisfactory results.

The above-mentioned test,  $H_0$  vs.  $H_1$ , can be tested through GLRT and the test statistic is given in Eq. 34.

$$-2\ln\alpha = -2\{l(\mathbf{\Omega}_i = \widehat{\mathbf{\Omega}}_{i0}; Y_{ij}) - l(\mathbf{\Omega}_i = \widehat{\mathbf{\Omega}}_i; Y_{ij})\} \quad (34)$$

where,  $\widehat{\mathbf{\Omega}}_{i0}$ : Maximum Likelihood Estimator (MLE) of  $\mathbf{\Omega}_i$  for  $i^{th}$  gene under the constraint of  $H_0$  and  $\widehat{\mathbf{\Omega}}_i$ : unconstrained MLE of  $\mathbf{\Omega}_i$  for  $i^{th}$  gene,  $\mathbf{\Omega}_i$ : parametric space for  $i^{th}$  gene, *i.e.*,  $\mathbf{\Omega}_i = \{\mu_i, \theta_i, \pi_i\}$ . The test statistic in Eq. 34 is asymptotically distributed as Chi-square distribution with 1 degree of freedom under  $H_0$ .

We applied the above procedure to Tung et al.'s scRNA-seq data to test the statistical significance of the zero inflation parameters of genes. The results are shown in below Figure. It can be observed that most of the genes in scRNA-seq data are found to be zero inflated as their

corresponding  $p$ -values are less than the level of significance value. This finding motivates us to develop a statistical approach for testing of differential zero inflation of genes.

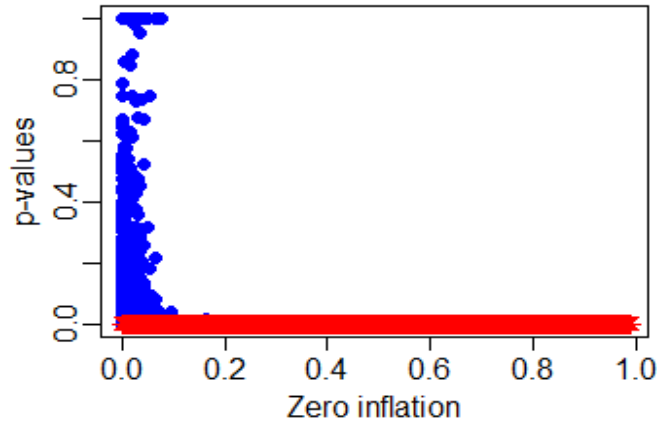

**Plotting of estimated value of zero inflation parameter and their corresponding  $p$ -values.** X-axis represents estimated values of zero inflation, (higher value of zero inflation parameter means a greater number of zeros found in the expression vector of that gene) and Y-axis represents the computed statistical significance value for the zero-inflation parameter, lesser the value represents the gene is more zero inflated.

### **Document S8: Statistical testing for overdispersion parameters in scRNA-seq data**

For testing the statistical significance of the dispersion parameter of  $i^{th}$  gene  $\theta_i$  of the ZINB model, we adopt the following GLRT procedure. Here, for the testing purpose, we define the following null hypothesis.

$$H_0: \theta_i = 0 \text{ vs. } H_1: \theta_i \neq 0$$

where,  $H_0$ : null hypothesis;  $H_1$ : alternate hypothesis. In other words, null hypothesis tells us that  $i^{th}$  gene is not dispersed, means the mean is same as the variance and subsequently, the scRNA-seq count data is obtained from a Poisson model. Further, if we fail to reject  $H_0$ , then we can say UMI counts scRNA-seq data is not overdispersed and simply fitting a Poisson model will give satisfactory results.

The above-mentioned test,  $H_0$  vs.  $H_1$ , can be tested through GLRT and the test statistic is given in Eq. 35.

$$-2\ln\alpha = -2\{l(\boldsymbol{\Omega}_i = \hat{\boldsymbol{\Omega}}_{i0}; Y_{ij}) - l(\boldsymbol{\Omega}_i = \hat{\boldsymbol{\Omega}}_i; Y_{ij})\} \quad (35)$$

where,  $\hat{\boldsymbol{\Omega}}_{i0}$ : MLE of  $\boldsymbol{\Omega}_i$  for  $i^{th}$  gene under the constraint of  $H_0$  and  $\hat{\boldsymbol{\Omega}}_i$ : unconstrained MLE of  $\boldsymbol{\Omega}_i$  for  $i^{th}$  gene,  $\boldsymbol{\Omega}_i$ : parametric space for  $i^{th}$  gene, *i.e.*,  $\boldsymbol{\Omega}_i = \{\mu_i, \theta_i, \pi_i\}$ . The test statistic in Eq. 35 is asymptotically distributed as Chi-square distribution with 1 degree of freedom under  $H_0$ .

We applied the above procedure to Tung et al.'s scRNA-seq data to test the statistical significance of the dispersion parameters of genes. The results are shown in below Figure. It can be observed that all the genes in Tung's scRNA-seq data is found to be zero inflated as their corresponding *p-values* are less than the level of significance value (at alpha = 0.0001) (below Figure). This finding is well reported in literature.

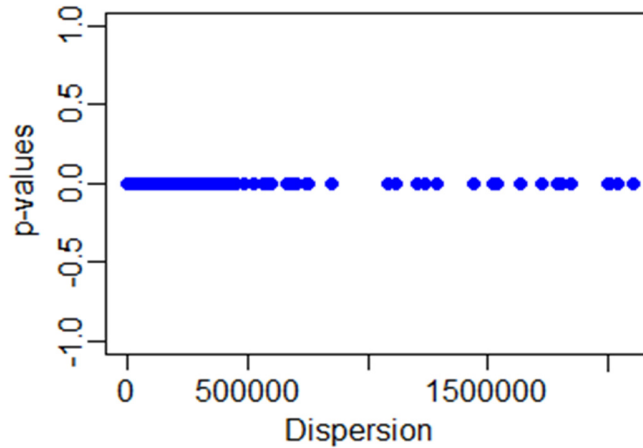

**Testing for statistical significance of dispersion parameters.** X-axis represents estimated values of overdispersion parameter through a ZINB model, and Y-axis represents the computed statistical significance value for the overdispersion parameter, lesser the value represents the gene is more overdispersed.

### **Document S9: Application of Count Data Models to Zero-Inflated and Overdispersed Real Datasets**

In this section, we discuss about the fitting and suitability of different count data models such as NB, ZINB, PD, ZIPD and HD to the zero inflated and over dispersed datasets. These data set include, Embryonic Mouse Cysts count data and scRNA-seq UMI read counts data of a single gene, *i.e.* ENSG00000162585 from Tung's data [2].

### A. Embryonic Mouse Cysts Data

Earlier experimental studies have shown that the scRNA-seq (UMI) read count data is zero inflated and over dispersed [1,43–48]. Hence, we consider a published zero-inflated and over-dispersed data on counts of cysts in embryonic mouse [49] to study the suitability of different discrete models. Here, we consider data on counts of cysts in embryonic mouse kidneys which had been subjected to steroids, taken from McElduff et al. [49]. This data reveals the details of the effect of a low protein diet in mice on kidney development in their offspring. Data on counts of cysts in embryonic mouse kidneys which had been subjected to steroid were featured in this study. Then, the count data models, such as NBD, ZINB, PD, ZIPD and HD are fitted on this data. Further, the parameters of these models are estimated through Maximum Likelihood Estimation (MLE) method. The observed frequencies and expected frequencies from different count models along with their estimated parameters are shown in Table S5. The goodness of fit of the above models to this experimental data is assessed through AIC and BIC.

**Table S5.** Fitting of well-known discrete models to over-dispersed and zero-inflated cyst count data.

| Read  | Obs. Freq. | Exp. Freq. NBD | Exp. Freq. ZINBD | Exp. Freq. PD | Exp. Freq. ZIPD | Exp. Freq. HD |
|-------|------------|----------------|------------------|---------------|-----------------|---------------|
| 0     | 65         | 63.29          | 64.99            | 25.1          | 65.03           | 45.36         |
| 1     | 14         | 17.56          | 14.01            | 37.32         | 5.1             | 13.75         |
| 2     | 10         | 8.98           | 9.11             | 27.74         | 8.87            | 28.92         |
| 3     | 6          | 5.72           | 6.27             | 13.74         | 10.28           | 8.35          |
| 4     | 4          | 3.91           | 4.44             | 5.11          | 8.93            | 9.19          |
| 5     | 2          | 2.79           | 3.2              | 1.52          | 6.21            | 2.53          |
| 6     | 2          | 2.04           | 2.33             | 0.38          | 3.6             | 1.94          |
| 7     | 2          | 1.52           | 1.71             | 0.08          | 1.79            | 0.51          |
| 8     | 1          | 1.15           | 1.26             | 0.01          | 0.78            | 0.31          |
| 9     | 1          | 0.88           | 0.93             | 0             | 0.3             | 0.08          |
| 10    | 1          | 0.68           | 0.69             | 0             | 0.1             | 0.04          |
| 11    | 2          | 0.52           | 0.52             | 0             | 0.03            | 0.01          |
| 12    | 1          | 0.41           | 0.38             | 0             | 0.01            | 0             |
| Total | 111        | 110.95         | 110.84           | 111           | 111.03          | 110.99        |

|                     |                             |                                                    |               |                                |                                    |
|---------------------|-----------------------------|----------------------------------------------------|---------------|--------------------------------|------------------------------------|
| Parameters<br>(MLE) | $\mu=1.49$<br>$\theta=0.31$ | $\mu = 2.285$<br>$\theta = 0.698$<br>$\pi = 0.349$ | $\mu = 1.486$ | $\mu = 3.476$<br>$\pi = 0.572$ | $\mu = 1.487$<br>$\varphi = 1.796$ |
| #Parameters         | 2                           | 3                                                  | 1             | 2                              | 2                                  |
| Likelihood          | -175.22                     | -172.8                                             | -263.25       | -191.9                         | -202.84                            |
| AIC                 | 354.44                      | 351.60                                             | 528.50        | 387.80                         | 409.68                             |
| BIC                 | 354.53                      | 351.74                                             | 528.55        | 387.89                         | 409.77                             |

#Parameters: number of parameters;  $\mu$ : Mean;  $\theta$ : size;  $\pi$ : zero-inflation probability;  $\varphi$ : dispersion index (ratio of variance to mean); AIC: Akaike Information Criterion; BIC: Bayesian Information Criterion; Obs. Freq: Observed Frequency; Exp. Freq. NBD: computed expected frequency through NB model; Exp. Freq. ZINB: computed expected frequency through ZINB model; Exp. Freq. PD: computed expected frequency through Poisson model; Exp. Freq. ZIPD: computed expected frequency through ZIPD model; Exp. Freq. HD: computed expected frequency through HD model

It is observed that the expected frequencies computed from ZINB are closer to their observed values as compared to other models. Further, the AIC and BIC values (Eq. 19, 20) for ZINB is lowest followed by NB model for the given zero inflated and over dispersed cyst count data as compared to PD, ZIPD and HD (Table S5). This indicates, for fitting over-dispersed and zero inflated datasets like scRNA-seq data, ZINB model provides a better fit as compared to other count models, *i.e.*, NB, PD, ZIPD and HD (Table S5). Moreover, we validate the above claim by using another overdispersed and zero-inflated dataset from scRNA-seq study.

### ***B. Application to scRNA-seq read counts data***

Here, we fitted the considered count data models, such as NB, ZINB, PD, ZIPD and HD to the scRNA-seq read counts of ENSG00000162585 gene taken from Tung's data (available at <https://github.com/jdblischak/singleCellSeq>). The observed and expected frequencies computed through different count models for each read sequences along with estimated values of the parameters are shown in Table S6.

**Table S6.** Fitting of well-known discrete models to over-dispersed and zero-inflated scRNA-seq read count data.

| UMI<br>Reads | Obs.<br>Freq. | Pred. Freq.<br>NB | Pred. Freq.<br>PD | Pred. Freq.<br>HD | Pred. Freq.<br>ZINB | Pred. Freq.<br>ZIP |
|--------------|---------------|-------------------|-------------------|-------------------|---------------------|--------------------|
|--------------|---------------|-------------------|-------------------|-------------------|---------------------|--------------------|



|    |     |        |       |       |        |       |
|----|-----|--------|-------|-------|--------|-------|
| 0  | 115 | 108.05 | 0.09  | 4.82  | 126.82 | 115   |
| 1  | 84  | 57.92  | 0.78  | 3.34  | 56.96  | 0.06  |
| 2  | 45  | 42.58  | 3.37  | 20.33 | 39.79  | 0.36  |
| 3  | 33  | 34.13  | 9.73  | 13.54 | 31.11  | 1.34  |
| 4  | 31  | 28.48  | 21.03 | 42.8  | 25.61  | 3.73  |
| 5  | 18  | 24.34  | 36.39 | 27.48 | 21.73  | 8.32  |
| 6  | 12  | 21.13  | 52.46 | 59.94 | 18.79  | 15.44 |
| 7  | 10  | 18.53  | 64.83 | 37.17 | 16.48  | 24.56 |
| 8  | 7   | 16.39  | 70.11 | 62.84 | 14.6   | 34.19 |
| 9  | 9   | 14.59  | 67.38 | 37.71 | 13.03  | 42.31 |
| 10 | 4   | 13.05  | 58.29 | 52.62 | 11.7   | 47.12 |
| 11 | 6   | 11.72  | 45.84 | 30.59 | 10.56  | 47.71 |
| 12 | 12  | 10.56  | 33.04 | 36.67 | 9.58   | 44.28 |
| 13 | 4   | 9.54   | 21.99 | 20.68 | 8.71   | 37.94 |
| 14 | 3   | 8.64   | 13.59 | 21.87 | 7.95   | 30.18 |
| 15 | 5   | 7.84   | 7.84  | 11.98 | 7.27   | 22.41 |
| 16 | 8   | 7.13   | 4.24  | 11.39 | 6.67   | 15.6  |
| 17 | 6   | 6.5    | 2.16  | 6.07  | 6.13   | 10.22 |
| 18 | 4   | 5.93   | 1.04  | 5.27  | 5.64   | 6.32  |
| 19 | 7   | 5.41   | 0.47  | 2.74  | 5.2    | 3.71  |
| 20 | 5   | 4.95   | 0.2   | 2.19  | 4.8    | 2.06  |
| 21 | 5   | 4.53   | 0.08  | 1.11  | 4.43   | 1.09  |
| 22 | 4   | 4.15   | 0.03  | 0.83  | 4.1    | 0.55  |
| 23 | 5   | 3.8    | 0.01  | 0.41  | 3.8    | 0.27  |
| 24 | 6   | 3.49   | 0     | 0.29  | 3.53   | 0.12  |
| 25 | 4   | 3.21   | 0     | 0.14  | 3.27   | 0.06  |
| 26 | 7   | 2.95   | 0     | 0.09  | 3.04   | 0.02  |
| 27 | 5   | 2.71   | 0     | 0.04  | 2.83   | 0.01  |
| 28 | 5   | 2.49   | 0     | 0.03  | 2.63   | 0     |
| 29 | 3   | 2.29   | 0     | 0.01  | 2.45   | 0     |
| 30 | 2   | 2.11   | 0     | 0.01  | 2.28   | 0     |
| 31 | 2   | 1.95   | 0     | 0     | 2.12   | 0     |
| 33 | 5   | 1.65   | 0     | 0     | 1.85   | 0     |
| 34 | 5   | 1.53   | 0     | 0     | 1.72   | 0     |
| 35 | 7   | 1.41   | 0     | 0     | 1.61   | 0     |
| 36 | 3   | 1.3    | 0     | 0     | 1.5    | 0     |
| 39 | 4   | 1.03   | 0     | 0     | 1.23   | 0     |
| 40 | 2   | 0.95   | 0     | 0     | 1.15   | 0     |
| 41 | 1   | 0.88   | 0     | 0     | 1.08   | 0     |
| 42 | 3   | 0.81   | 0     | 0     | 1.01   | 0     |
| 43 | 1   | 0.75   | 0     | 0     | 0.94   | 0     |
| 46 | 3   | 0.59   | 0     | 0     | 0.78   | 0     |
| 47 | 1   | 0.55   | 0     | 0     | 0.73   | 0     |

|                         |   |                              |            |                               |                                                    |                              |
|-------------------------|---|------------------------------|------------|-------------------------------|----------------------------------------------------|------------------------------|
| 49                      | 2 | 0.47                         | 0          | 0                             | 0.64                                               | 0                            |
| 50                      | 2 | 0.44                         | 0          | 0                             | 0.6                                                | 0                            |
| Paramet<br>ers<br>(MLE) |   | $\mu=8.14$<br>$\theta=0.574$ | $\mu=8.65$ | $\mu=8.651$<br>$\varphi=1.92$ | $\mu=8.652$<br>$\theta=0.47377$<br>$\pi=1.173e-05$ | $\mu=11.1373$<br>$\pi=0.224$ |

#Parameters: parameters estimated through MLE;  $\mu$ : Mean;  $\theta$ : size;  $\pi$ : zero-inflation probability;  $\varphi$ : dispersion index (ratio of variance to mean); Obs. Freq: Observed Frequency; Pred. Freq. NBD: computed predicted frequency through NB model; Pred. Freq. ZINB: computed predicted frequency through ZINB model; Pred. Freq. PD: computed predicted frequency through Poisson model; Pred. Freq. ZIPD: computed predicted frequency through ZIPD model; Pred. Freq. HD: computed predicted frequency through HD model

It is observed that the expected frequencies computed from ZINB model are closer to their observed counter parts as compared to other models, such as NB, PD, ZIPD and HD (Table S6). Further, the fitting of the discrete models in terms of density plots are shown in Figure S2. This indicates, for fitting overdispersed and zero inflated scRNA-seq data, ZINB model provides a better fit to the observed scRNA-seq data as compared to other count models (Tables S6, Figure S2). Therefore, from the above applications of discrete models to zero-inflated and overdispersed scRNA-seq data, we can conclude that the ZINB model provides better fit to the data and better estimates of the parameters as compared to NB model. In other words, NB model is extensively used for modeling and fitting of bulk RNA-seq count data. But it performed poor when it is used for fitting the scRNA-seq data, which is simultaneously zero inflated and overdispersed (Figure S2). It can be observed that, for fitting overdispersed and zero inflated datasets like scRNA-seq data, ZINB model provides a better estimate of the mean and dispersion parameters as compared to other count data models (Table S6, Figure S2). More specifically, we test the ability of NB, and ZINB models to estimate the mean and dispersion parameters for scRNA-seq count data through simulation, which is described in the following section.

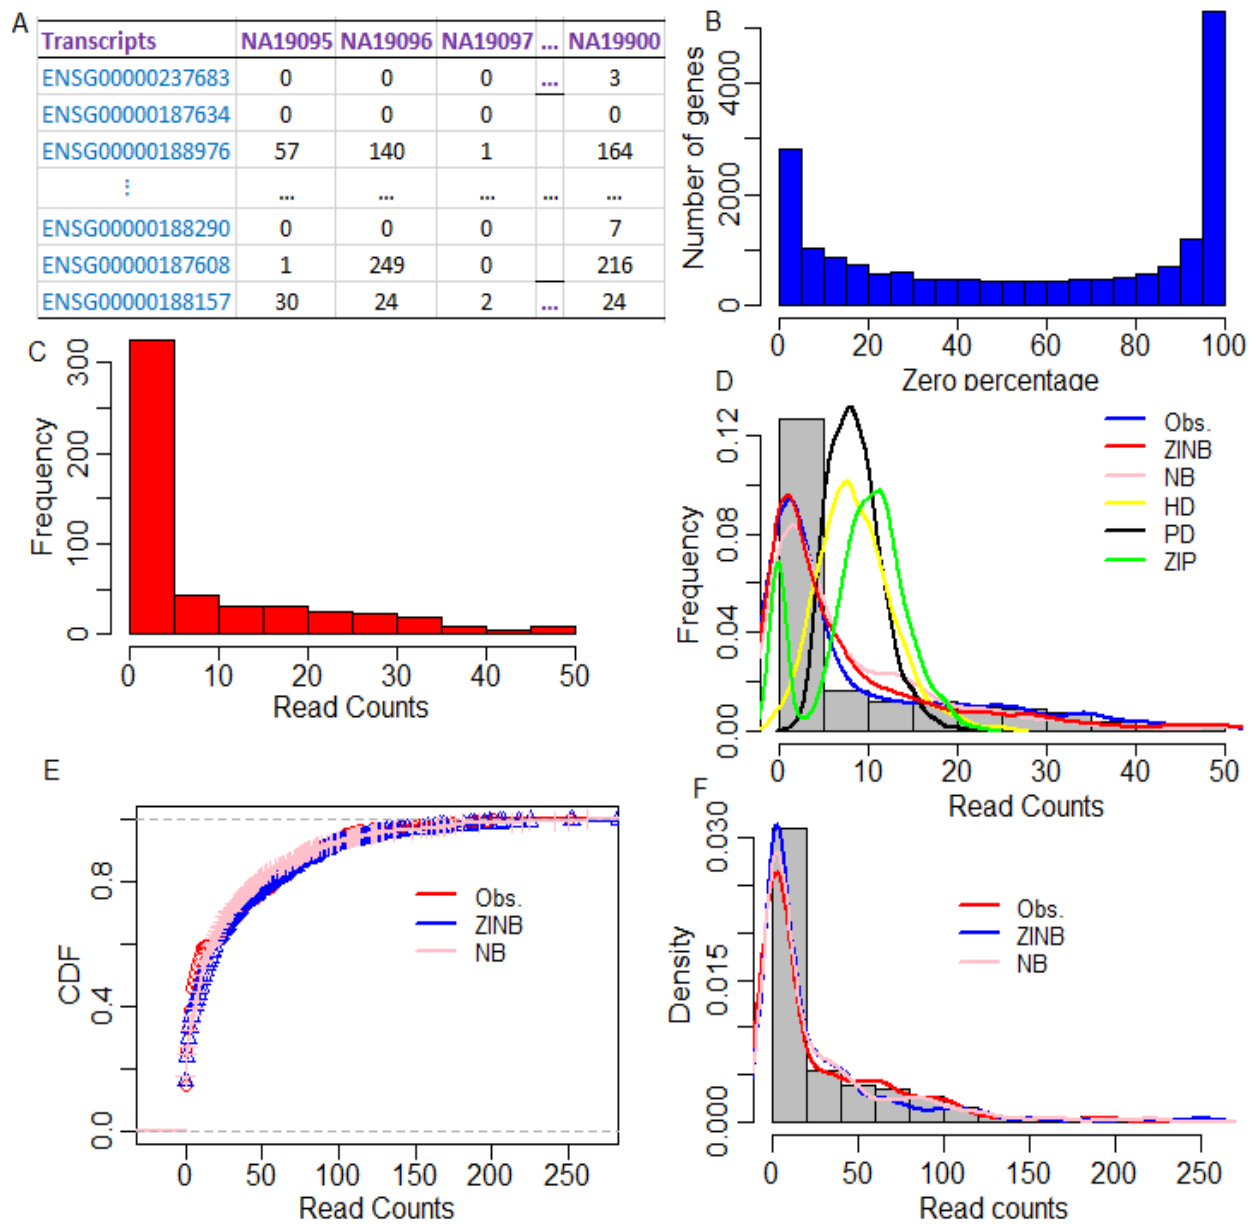

**Figure S2. Data Characteristics, Distributions and Fitting of Various Discrete Data Models.**

(A) Glimpse of the scRNA-seq (UMI) read count data matrix. Here, rows represent the genes and columns represent the cell lines. The values represent the number of read of sequences mapped to each gene. (B) Distribution of zero percentages of genes in scRNA-seq data. X-axis represents the various zero percentages and Y-axis represents the number of genes. Here, the approx. 5000 genes have ~100 % zeros across all the cells, which indicates of zero-inflation in scRNA-seq data. (C) Distribution of scRNA-seq read counts of ENSG00000176022 gene (from Tung's data). X-axis represents the reads and Y-axis represents the frequency of the reads. (D) Fitting of Various Discrete Data Models to scRNA-seq read counts of ENSG00000176022 gene (from Tung's data). X-axis represents the read counts and Y-axis represents the density of read counts. The fitting of observed density and densities from the Negative Binomial (NB), Zero Inflated Negative Binomial (ZINB), Poisson Distribution (PD), Zero Inflated Poisson (ZIP) and Hermite Distribution (HD) to the observed data are shown in different colors. (E) Cumulative Distribution Function (CDF) plot for scRNA-seq data of ENSG00000176022 gene (from Tung's data). Here, X-axis represents the read counts and Y-axis represents the cumulative density of read counts. Observed CDF, and CDFs from NB and ZINB models are

shown in blue, pink, and red colors, respectively. (F) Density plots for scRNA-seq data of ENSG00000176022 gene (from Tung's data). Here, X-axis represents the read counts and Y-axis represents the density of read counts. Observed density plot, and density plots from NB and ZINB models are shown in blue, pink, and red colors, respectively.

### **Document S10. Comparative analysis of NB and ZINB models**

NB model is implemented in popular RNA-seq DE tools such as DESeq2, edgeR, baySeq, cuffdiff, [13,14,50,51] *etc.* for analysis of RNA-seq count data. Such datasets are overdispersed but may not zero-inflated. It is pertinent to test its performance on scRNA-seq datasets, which is both zero inflated and overdispersed. So, we took scRNA-seq read counts of ENSG00000176022 gene over 576 cells from Tung's data available at [www.github.com/jdblischak/singleCellSeq](https://www.github.com/jdblischak/singleCellSeq) and NCBI's Gene Expression Omnibus database with GEO Series accession number GSE77288 (<http://www.ncbi.nlm.nih.gov/geo/query/acc.cgi?acc=GSE77288>) [2]. The distribution (*i.e.*, histogram) of scRNA-seq read counts of ENSG00000176022 gene is shown in Figure S2C. The fitting of NB and ZINB models to this observed scRNA-seq data is shown in Figures S2E and F. Then, we estimated the parameters of the ZINB model for this gene through executing the *zeroinfl* function implemented in *pscl* R package [52] and the results are shown in Table S7.

We applied NB and ZINB models to test their ability estimate the mean and dispersion parameters for scRNA-seq count data under an artificial setup. For this purpose, parameter estimates for ENSG00000176022 gene is used to simulate count expression data through ZINB model given in Eq. 5. Here, we simulated the zero inflated and overdispersed count data of the gene over 500 cells. Then both the models, such as NB and ZINB are applied on these simulated datasets to estimate the parameters through MLE. The simulation is repeated over 100 times to generate 100 scRNA-seq artificial datasets and both the NB and ZINB models are fitted to estimate their parameters. For this purpose, we executed *zeroinfl* and *glm.nb* functions implemented in *pscl* [52] and MASS statistical R packages respectively. The results are shown in Table S7.

**Table S7.** Comparative analysis of NB and ZINB models for estimation of parameters from scRNA-seq data.

| Parameters                     | True values | NB Model |         |      |                | ZINB Model |       |       |                  |
|--------------------------------|-------------|----------|---------|------|----------------|------------|-------|-------|------------------|
|                                |             | Estimate | Bias    | MSE  | 95% CI         | Estimate   | Bias  | MSE   | 95% CI           |
| Mean ( $\mu$ )                 | 115.21      | 65.981   | -49.229 | 1.61 | (56.24, 75.71) | 115.252    | 0.042 | 1.261 | (112.78, 117.70) |
| Dispersion ( $\theta^{-1}$ )   | 3.322       | 5.3236   | 1.865   | 0.38 | (2.284, 2.364) | 3.244      | 0.078 | 0.057 | (2.658, 3.829)   |
| Zero inflation prob. ( $\pi$ ) | 0.432       | -        | -       | -    | -              | 0.430      | 0.002 | 0.003 | (0.422, 0.445)   |

Number of cells: 500; number of simulations: 100; MSE: Mean Standard Error; CI: Confidence Interval

Our analysis indicates that NB model underestimate the mean and over-estimate the dispersion parameters for scRNA-seq data (Table S7). The ZINB model provides better estimates of mean and dispersion, which are close to their true values for scRNA-seq data. Further, ZINB model has lower bias and MSE as compared to NB model (Table S7). It is interesting to note that 95% confidence interval of parameters for NB model is quite wider and do not contain the true values of the parameters. While this observation is quite satisfactory for ZINB model (Table S7). This indicates the better suitability of ZINB model for modeling the zero-inflated and over-dispersed scRNA-seq count data and provides better estimates of the parameters. The reason may be attributed as NB model thus accommodates excess zeros by underestimating the mean and overestimating the dispersion parameters. This phenomenon jeopardizes the statistical power of NB distribution-based tools to discover DE genes in the presence of zero-inflation, when applied to scRNA-seq data.

#### **Document S11. Performance evaluation of DE methods based on runtime criterion.**

We used the run time criterion (C13) (Table S4) to evaluate the performance of the tested DE methods given in Tables S2 and S3. Here, the run time refers to the amount of time required to get the informative Differentially Expressed Genes (DEG) of particular size through providing the

gene expression data as input to the R functions of the respective methods. Here, we performed all analyses on a standard 16 GB RAM Dell PC with Intel(R) Core (TM) i3-6100U CPU @ 2.30GHz, 2301 Mhz, 2 Core(s) Processor(s) and recorded the computational time required to analyze a gene expression data of 10,000 genes with 500 cells (cell group 1: 250 and cell group 2: 250). The scores of the tested methods based on the runtime criterion can be computed through Eq. 36 and the results are shown in following Table.

Let,  $p_r$  be the rank of  $r^{th}$  DE method based on the computational time required to get the DE gene set of size from the data having 10000 genes with 200 cells. The rank score for  $r^{th}$  DE method can be calculated by using:

$$score_r = f(p_r) = \frac{1+M-p_r}{M} \quad (36)$$

where,  $score_r$  is the rank score for  $r^{th}$  DE method,  $M$  is the total number of methods used in the analysis. The result from the runtime-based analysis of scRNA-seq DE methods (Tables S2, S3) is shown in following Table.

Runtime based analysis of the tested scRNA-seq DE methods.

| Sl. No. | Methods  | Run Time       | Ranks ( $p_r$ ) | Rank score ( $score_r$ ) |
|---------|----------|----------------|-----------------|--------------------------|
| 1       | BPSC     | 20 Min.        | 9               | 0.57894737               |
| 2       | DECENT   | 20 hr. 15 Min. | 19              | 0.05263158               |
| 3       | DEGSeq   | 10 Min.        | 3               | 0.89473684               |
| 4       | DESeqNB  | 16.5 Min.      | 6               | 0.73684211               |
| 5       | DESeqLRT | 16 Min.        | 5               | 0.78947368               |
| 6       | DEsingle | 12 hr. 20 Min  | 18              | 0.10526316               |
| 7       | EBSeq    | 9 hr. 10 Min.  | 17              | 0.15789474               |
| 8       | edgeRLRT | 19 Min.        | 8               | 0.63157895               |
| 9       | edgeRQLF | 18 Min.        | 7               | 0.68421053               |
| 10      | EMDomics | 8 hr. 15 Min   | 16              | 0.21052632               |
| 11      | LIMMA    | 14 Min.        | 4               | 0.84210526               |
| 12      | MAST     | 22 Min.        | 11              | 0.47368421               |
| 13      | Monocle  | 23 Min.        | 12              | 0.42105263               |
| 14      | NBSeq    | 25 Min.        | 14              | 0.31578947               |
| 15      | NODES    | 24 Min.        | 13              | 0.36842105               |

|    |        |         |    |            |
|----|--------|---------|----|------------|
| 16 | ROTS   | 27 Min. | 15 | 0.26315789 |
| 17 | scDD   | 20 Min. | 10 | 0.52631579 |
| 18 | T-test | 8 Min.  | 1  | 1          |
| 19 | Wilcox | 9 Min.  | 2  | 0.94736842 |

hr. Hours requires to analyze the data; Min.: Minutes required

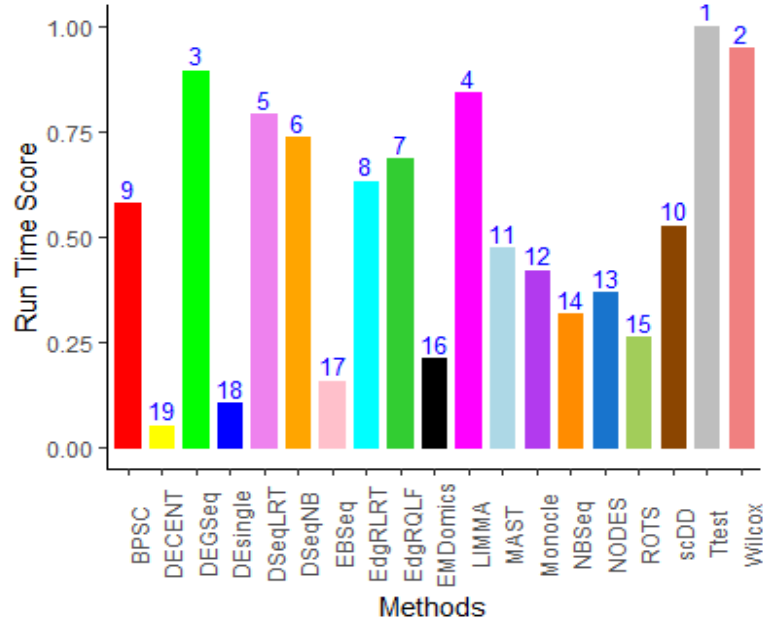

**Runtime based performance evaluation of the scRNA-seq DE methods.** X-axis represents the tested methods and Y-axis represents the runtime score.

## **Document S12. Similarity analysis of the scRNA-seq DE methods based on their ability to detect common DE genes**

### ***A. Similarity analysis based on the detection of common genes***

Let,  $n_{rm}$  be the number of common DE genes detected by  $r^{th}$  and  $m^{th}$  DE methods;  $K$ : number of genes present in the DE gene sets detected though any DE method (e.g., here 1000);  $p_{lm}$  be the proportions of the common genes detected by the  $r^{th}$  and  $m^{th}$  DE methods. The values of  $n_{rm}$  are given in following Figures.

|          | DECENT | DEGseq | DSeqNB | DSeqLRT | Dsingle | EBSseq | EdgRQLF | EdgRLRT | EMDomics | LIMMA | MAST | Monocle | NBSeq | NODES | ROTS | scDD | Ttest | Wilcox |
|----------|--------|--------|--------|---------|---------|--------|---------|---------|----------|-------|------|---------|-------|-------|------|------|-------|--------|
| BPSC     | 702    | 180    | 736    | 773     | 813     | 4      | 871     | 802     | 3        | 875   | 808  | 862     | 858   | 410   | 605  | 659  | 869   | 827    |
| DECENT   |        | 184    | 807    | 621     | 631     | 49     | 682     | 755     | 3        | 736   | 587  | 605     | 663   | 367   | 463  | 391  | 670   | 604    |
| DEGseq   |        |        | 197    | 160     | 177     | 277    | 180     | 186     | 6        | 180   | 178  | 176     | 181   | 431   | 257  | 153  | 177   | 174    |
| DSeqNB   |        |        |        | 687     | 686     | 31     | 747     | 784     | 3        | 767   | 653  | 674     | 725   | 380   | 521  | 458  | 736   | 665    |
| DSeqLRT  |        |        |        |         | 711     | 2      | 811     | 731     | 3        | 784   | 726  | 782     | 812   | 417   | 670  | 670  | 829   | 734    |
| Dsingle  |        |        |        |         |         | 2      | 873     | 845     | 3        | 819   | 925  | 887     | 870   | 419   | 635  | 614  | 832   | 955    |
| EBSseq   |        |        |        |         |         |        | 2       | 2       | 5        | 8     | 1    | 2       | 2     | 35    | 2    | 2    | 2     | 2      |
| EdgRLRT  |        |        |        |         |         |        |         | 883     | 3        | 889   | 863  | 898     | 932   | 428   | 660  | 630  | 935   | 880    |
| EdgRQLF  |        |        |        |         |         |        |         |         | 3        | 857   | 812  | 806     | 868   | 425   | 607  | 532  | 845   | 824    |
| EMDomics |        |        |        |         |         |        |         |         |          | 3     | 3    | 3       | 3     | 1     | 2    | 3    | 2     | 3      |
| LIMMA    |        |        |        |         |         |        |         |         |          |       | 809  | 838     | 873   | 416   | 607  | 620  | 890   | 820    |
| MAST     |        |        |        |         |         |        |         |         |          |       |      | 888     | 868   | 430   | 649  | 630  | 819   | 950    |
| Monocle  |        |        |        |         |         |        |         |         |          |       |      |         | 917   | 421   | 659  | 701  | 870   | 908    |
| NBSeq    |        |        |        |         |         |        |         |         |          |       |      |         |       | 433   | 666  | 641  | 903   | 882    |
| NODES    |        |        |        |         |         |        |         |         |          |       |      |         |       |       | 637  | 360  | 426   | 419    |
| ROTS     |        |        |        |         |         |        |         |         |          |       |      |         |       |       |      | 553  | 647   | 642    |
| scDD     |        |        |        |         |         |        |         |         |          |       |      |         |       |       |      |      | 649   | 639    |
| T.test   |        |        |        |         |         |        |         |         |          |       |      |         |       |       |      |      |       | 844    |

**(A) Common genes detected between any pair of tested methods for Soumillon 2 data.** The common genes between any pair of tested DE methods are shown in matrix form.

**(B) Common genes detected between any pair of tested methods for real scRNA-seq datasets.**

The common genes between any pair of tested DE methods are shown in matrix form for (A) Islam data; (B) Tung data; (C) Soumillon 1 data; (D) Soumillon 3 data; (E) Savas data; (F) Grun; (G) Gienrahn data; (H) Ziegenhain data; (I) Chen data.





The proportions of the common genes detected by any two scRNA-seq DE methods can be expressed in Eq. 36.

$$p_{rm} = \frac{n_{rm}}{K} \quad (36)$$

$H_0: n_{rm} = 0$  (no common genes detected between the  $r^{th}$  and  $m^{th}$  DE methods)

$H_1: n_{rm} > 0$  (common genes detected between the  $r^{th}$  and  $m^{th}$  DE methods)

To test  $H_0$  vs.  $H_1$  the Binomial test can be used. Here,  $n_{rm} \sim \text{Binom}(K, P_{rm})$  and the PMF of  $n_{rm}$  can be expressed in Eq. 37.

$$P[n_{rm} = S] = \binom{K}{S} P_{rm}^S (1 - P_{rm})^{K-S} \quad (37)$$

where,  $P_{rm}$  is the parameter usually unknown and can be estimated through Eq. 41. Under the large sample condition, the test statistic in Eq. 37 follows standard normal distribution asymptotically. The  $p$ -values for the above statistical tests (repeated for each pair of methods on all the datasets) can be computed through *Binom.test* function implemented in stats R package.

### ***B. Combined data analysis for detecting common genes***

Let,  $C_d$  be the total number of cells present in the  $d^{th}$  ( $d = 1, 2, \dots, D$ ) scRNA-seq data. Now, the weight depicting the ability of the  $r^{th}$  and  $m^{th}$  DE methods for detecting common genes over all the considered datasets can be expressed as in Eq. 38.

$$w_{rm} = \frac{\sum_{d=1}^D C_d p_{rmd}}{\sum_{d=1}^D C_d} \quad (38)$$

where,  $p_{rmd}$  be the proportions of the common genes detected by the  $r^{th}$  and  $m^{th}$  DE methods in  $d^{th}$  scRNA-seq data.

## Supplementary Figures (for Results and Discussion)

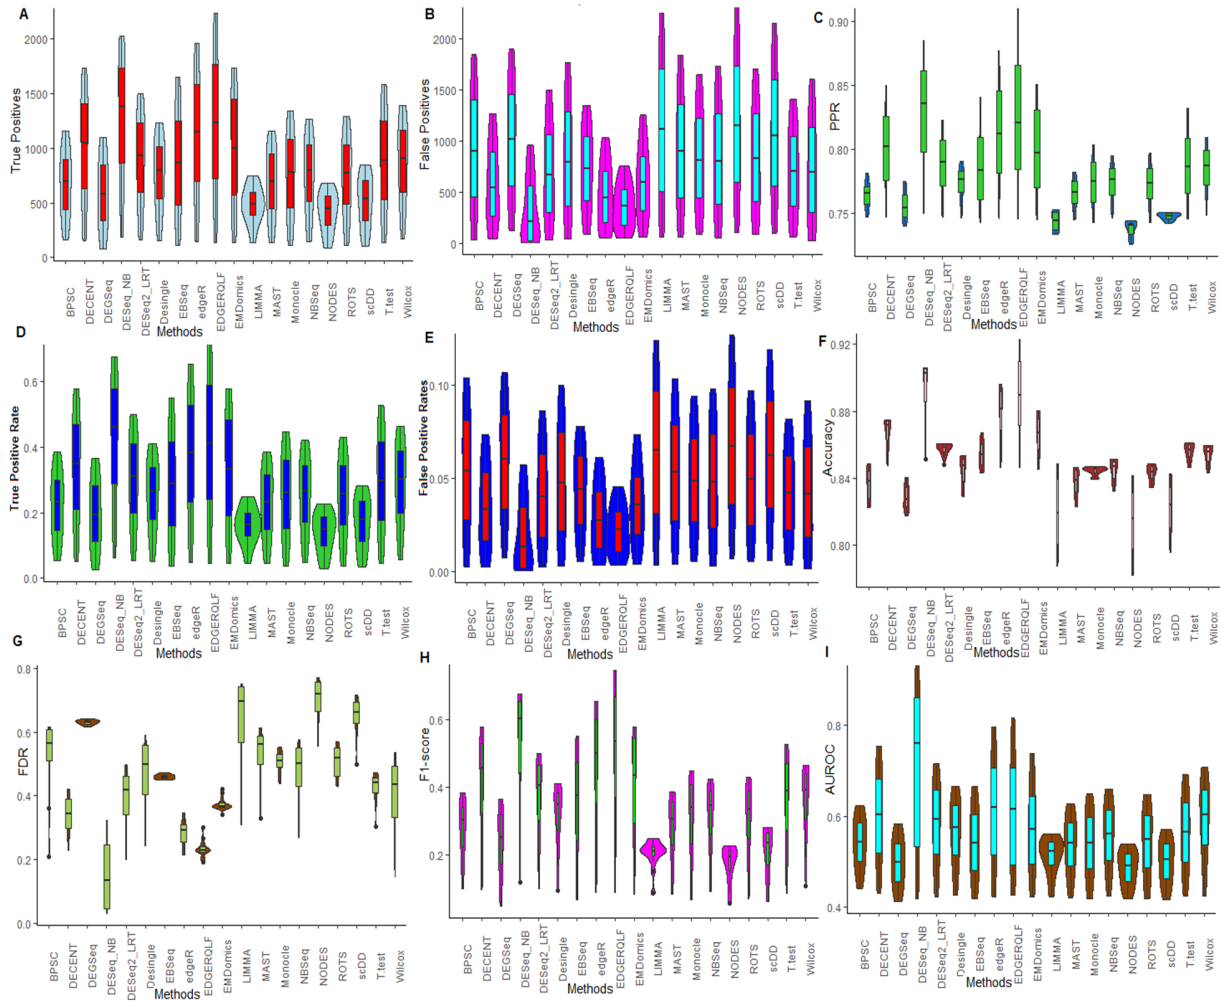

**Figure S3. Comparative performance evaluation of the Differential Expression (DE) methods through the performance metrics for Islam data.** The tested DE methods are evaluated on the Islam scRNA-seq data through the performance evaluation metrics, such as TP, FP, TPR, FPR, PPR, FDR, Accuracy, F1 score, and AUROC. The 19 tested methods are shown in the X-axis. The Violin plots are shown for comparative evaluation of tested methods through (A) TP; (B) FP; (C) PPR; (D) TPR; (E) FPR; (F) Accuracy; (G) FDR; (H) F1 score; and (I) AUROC. The violin plot shows the full distribution of the performance metrics computed through each tested method. The box represents inter-quartile range, the horizontal line represents median, the bars on the boxes shows the 1.5 x inter-quartile range.



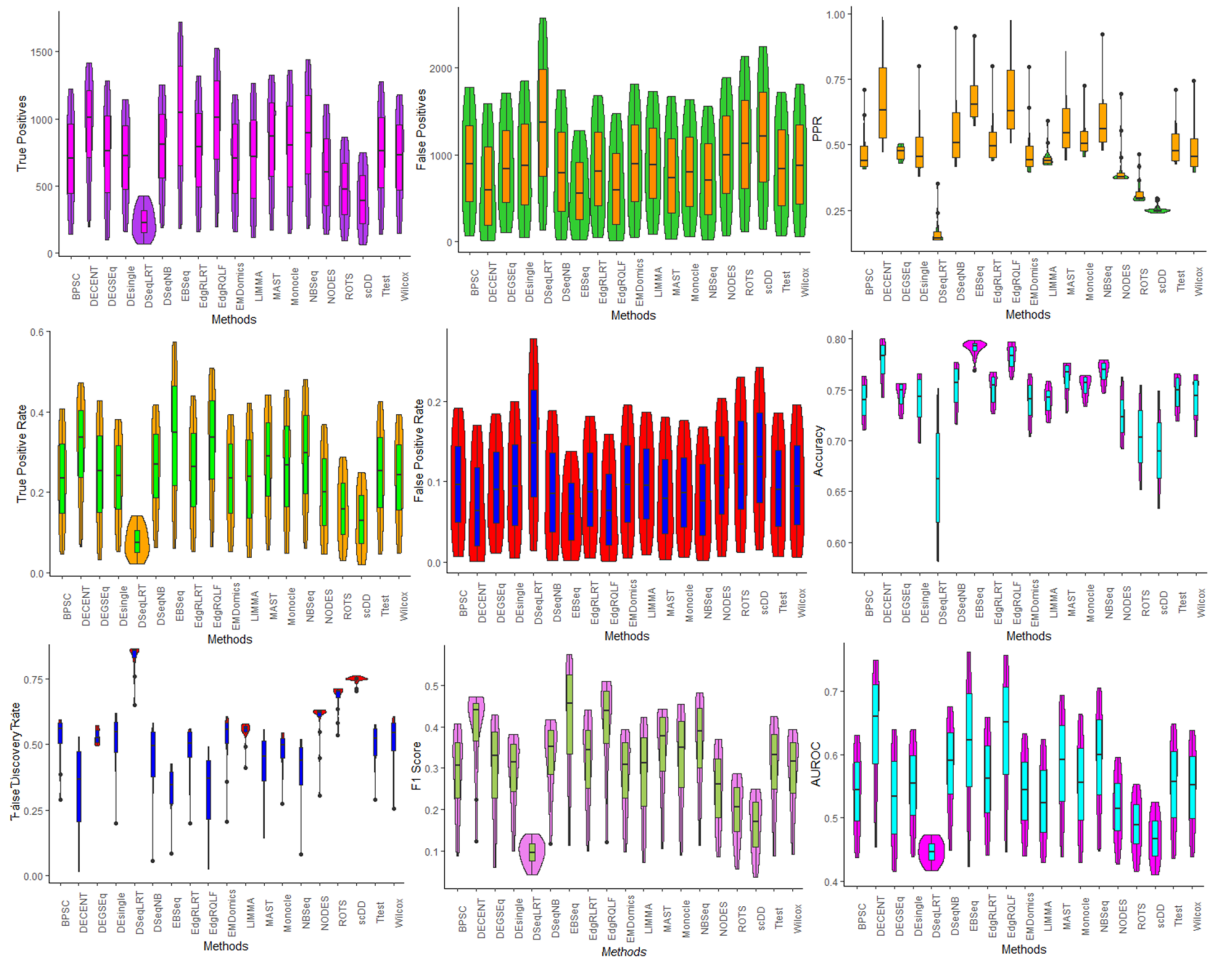

**Figure S5. Comparative performance evaluation of the Differential Expression (DE) methods through the performance metrics for Soumilion1 data.** The tested DE methods are evaluated on the Islam scRNA-seq data through the performance evaluation metrics, such as TP, FP, TPR, FPR, PPR, FDR, Accuracy, F1 score, and AUROC. The 19 tested methods are shown in the X-axis. The Violin plots are shown for comparative evaluation of tested methods through (A) TP; (B) FP; (C) PPR; (D) TPR; (E) FPR; (F) Accuracy; (G) FDR; (H) F1 score; and (I) AUROC. The violin plot shows the full distribution of the performance metrics computed through each tested method. The box represents inter-quartile range, the horizontal line represents median, the bars on the boxes shows the 1.5 x inter-quartile range.



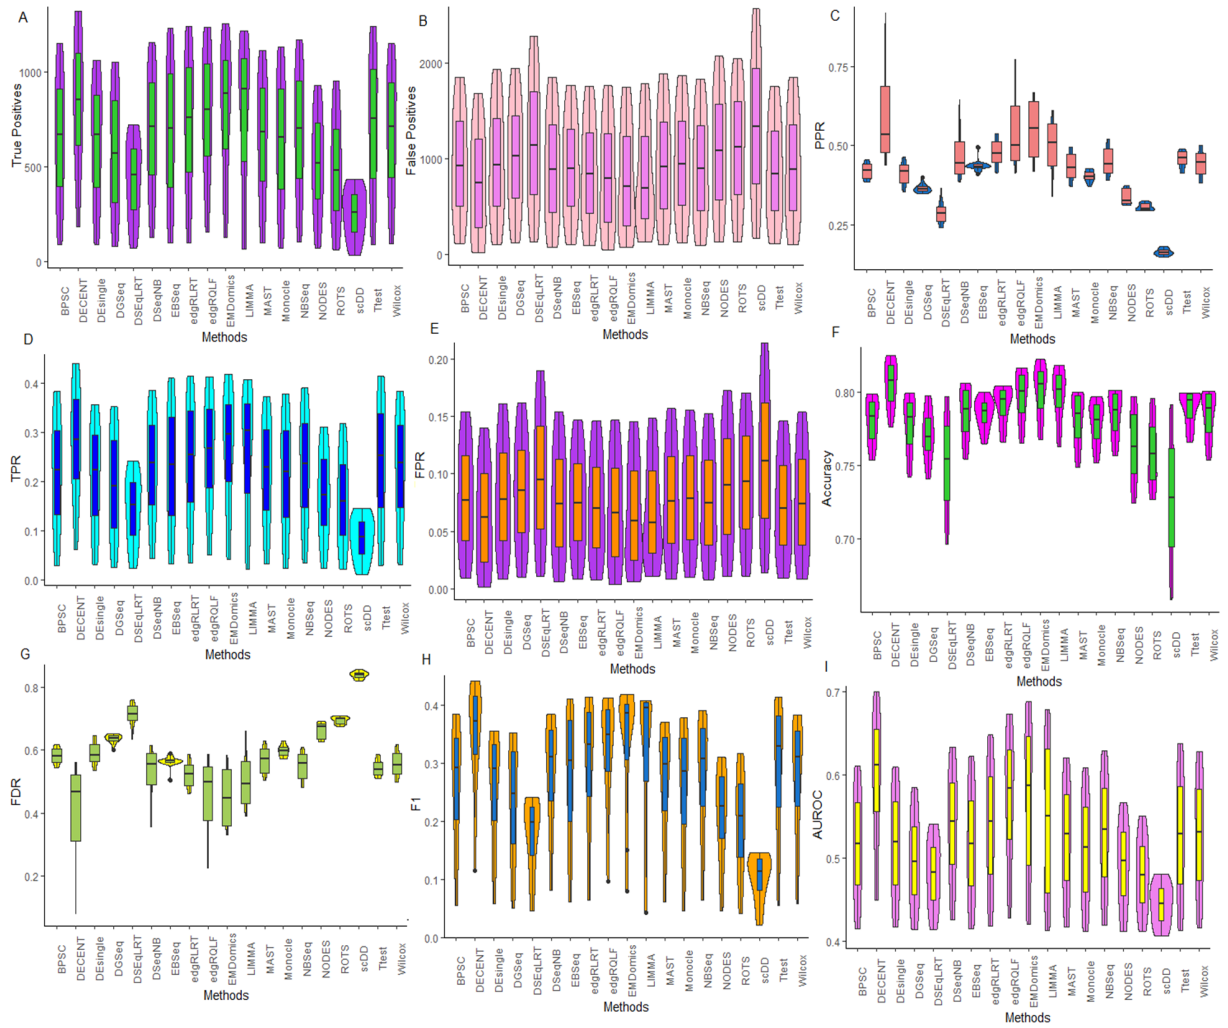

**Figure S6. Comparative performance evaluation of the Differential Expression (DE) methods through the performance metrics for Soumilion 3 data.** The tested DE methods are evaluated on the Islam scRNA-seq data through the performance evaluation metrics, such as TP, FP, TPR, FPR, PPR, FDR, Accuracy, F1 score, and AUROC. The 19 tested methods are shown in the X-axis. The Violin plots are shown for comparative evaluation of tested methods through (A) TP; (B) FP; (C) PPR; (D) TPR; (E) FPR; (F) Accuracy; (G) FDR; (H) F1 score; and (I) AUROC. The violin plot shows the full distribution of the performance metrics computed through each tested method. The box represents inter-quartile range, the horizontal line represents median, the bars on the boxes shows the 1.5 x inter-quartile range.

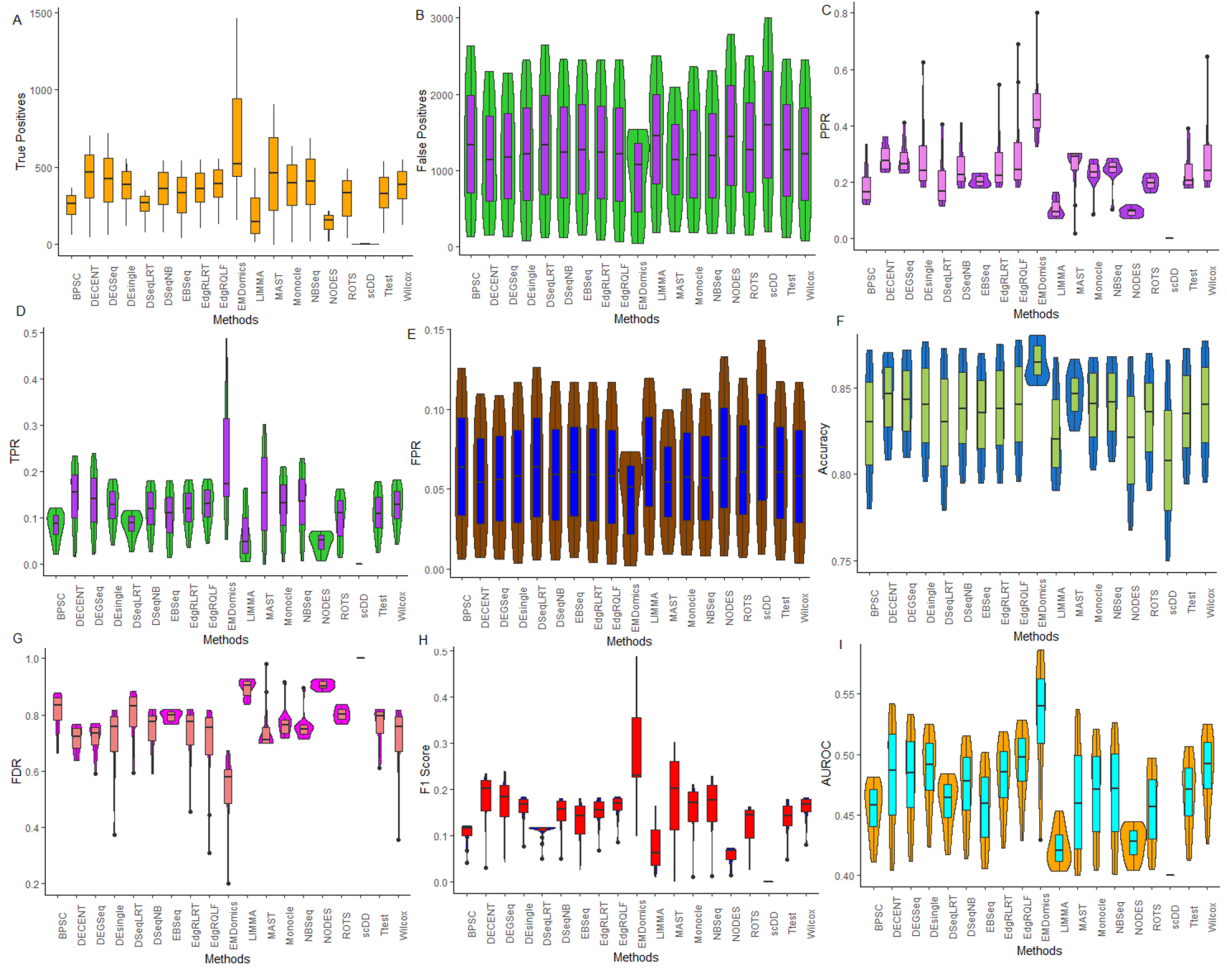

**Figure S7. Comparative performance evaluation of the Differential Expression (DE) methods through the performance metrics for Klein data.** The tested DE methods are evaluated on the Klein scRNA-seq data through the performance evaluation metrics, such as TP, FP, TPR, FPR, PPR, FDR, Accuracy, F1 score, and AUROC. The 19 tested methods are shown in the X-axis. The Violin plots are shown for comparative evaluation of tested methods through (A) TP; (B) FP; (C) PPR; (D) TPR; (E) FPR; (F) Accuracy; (G) FDR; (H) F1 score; and (I) AUROC. The violin plot shows the full distribution of the performance metrics computed through each tested method. The box represents inter-quartile range, the horizontal line represents median, the bars on the boxes shows the 1.5 x inter-quartile range.

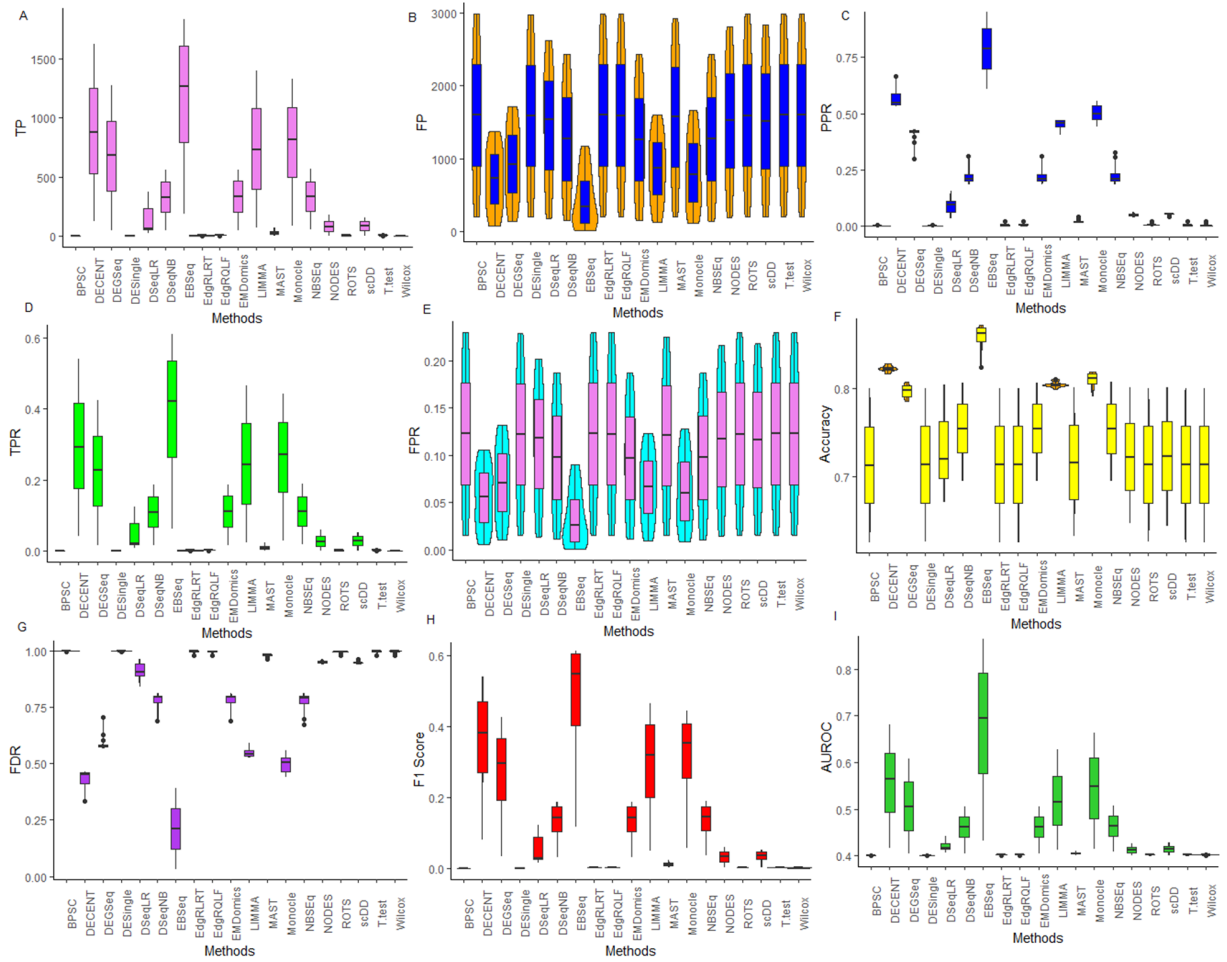

**Figure S8. Comparative performance evaluation of the Differential Expression (DE) methods through the performance metrics for Gierahn data.** The tested DE methods are evaluated on the Gierahn scRNA-seq data through the performance evaluation metrics, such as TP, FP, TPR, FPR, PPR, FDR, Accuracy, F1 score, and AUROC. The 19 tested methods are shown in the X-axis. The Violin plots are shown for comparative evaluation of tested methods through (A) TP; (B) FP; (C) PPR; (D) TPR; (E) FPR; (F) Accuracy; (G) FDR; (H) F1 score; and (I) AUROC. The violin plot shows the full distribution of the performance metrics computed through each tested method. The box represents inter-quartile range, the horizontal line represents median, the bars on the boxes shows the 1.5 x inter-quartile range.



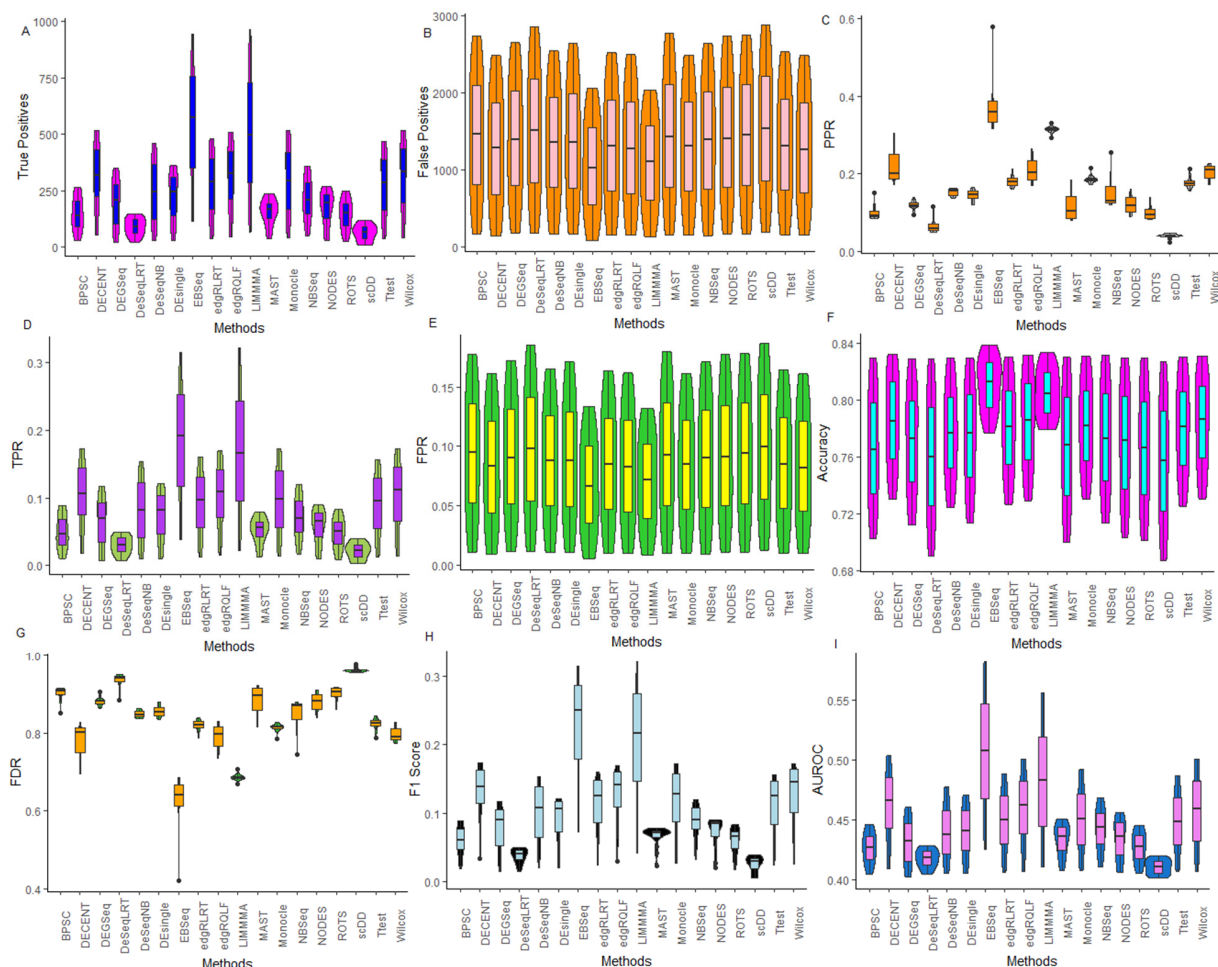

**Figure S9. Comparative performance evaluation of the Differential Expression (DE) methods through the performance metrics for Chen data.** The tested DE methods are evaluated on the Chen scRNA-seq data through the performance evaluation metrics, such as TP, FP, TPR, FPR, PPR, FDR, Accuracy, F1 score, and AUROC. The 19 tested methods are shown in the X-axis. The Violin plots are shown for comparative evaluation of tested methods through (A) TP; (B) FP; (C) PPR; (D) TPR; (E) FPR; (F) Accuracy; (G) FDR; (H) F1 score; and (I) AUROC. The violin plot shows the full distribution of the performance metrics computed through each tested method. The box represents inter-quartile range, the horizontal line represents median, the bars on the boxes shows the 1.5 x inter-quartile range.

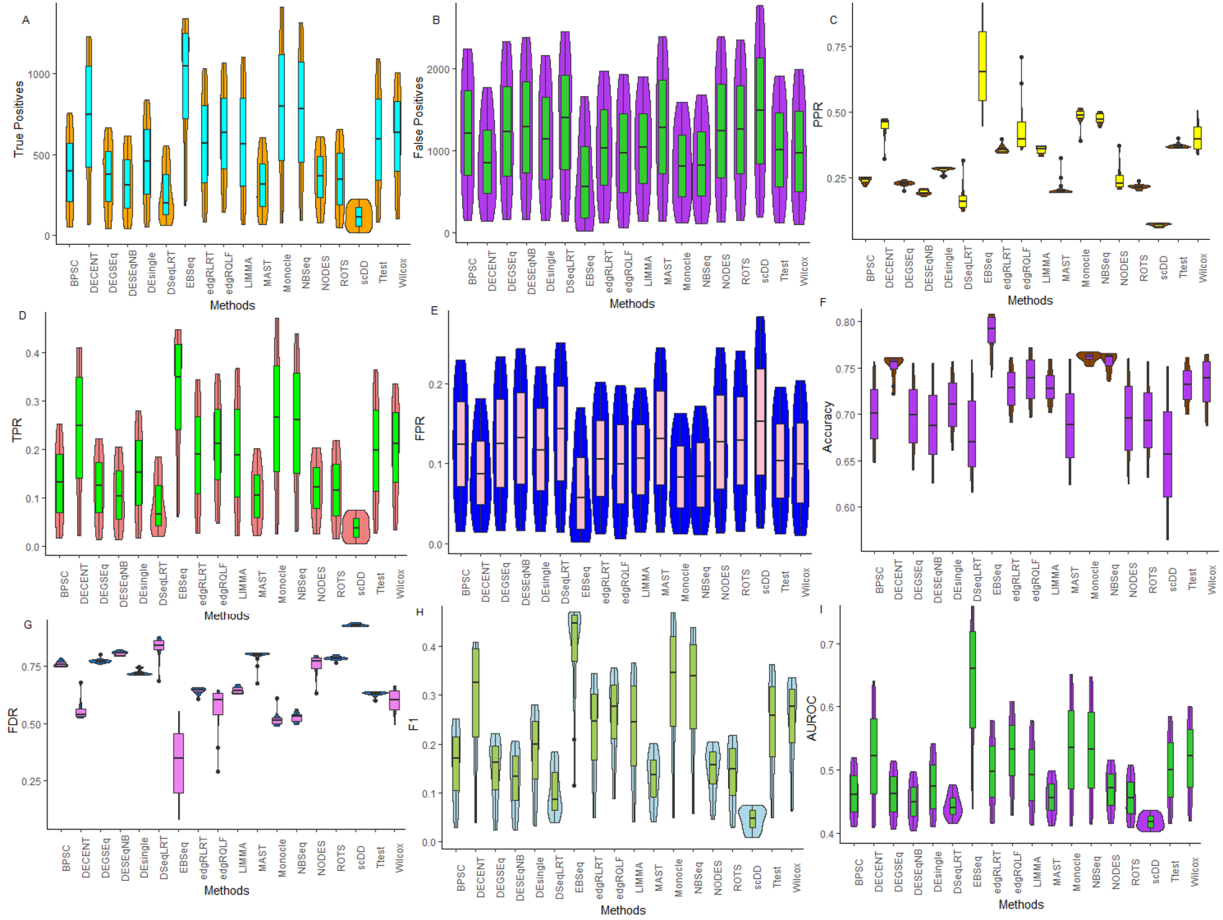

**Figure S10. Comparative performance evaluation of the Differential Expression (DE) methods through the performance metrics for Savas data.** The tested DE methods are evaluated on the Savas scRNA-seq data through the performance evaluation metrics, such as TP, FP, TPR, FPR, PPR, FDR, Accuracy, F1 score, and AUROC. The 19 tested methods are shown in the X-axis. The Violin plots are shown for comparative evaluation of tested methods through (A) TP; (B) FP; (C) PPR; (D) TPR; (E) FPR; (F) Accuracy; (G) FDR; (H) F1 score; and (I) AUROC. The violin plot shows the full distribution of the performance metrics computed through each tested method. The box represents inter-quartile range, the horizontal line represents median, the bars on the boxes shows the 1.5 x inter-quartile range.

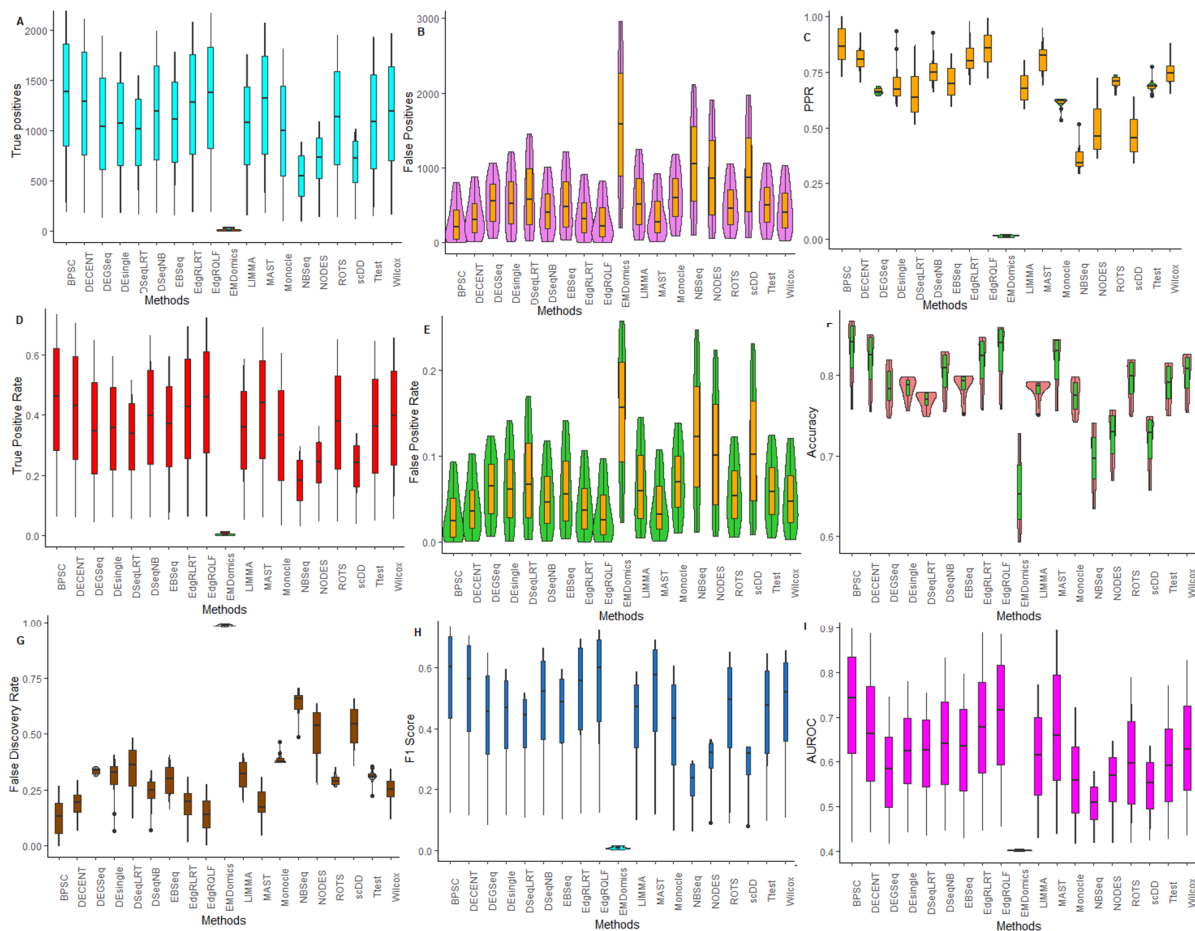

**Figure S11. Comparative performance evaluation of the Differential Expression (DE) methods through the performance metrics for Grun data.** The tested DE methods are evaluated on the Grun scRNA-seq data through the performance evaluation metrics, such as TP, FP, TPR, FPR, PPR, FDR, Accuracy, F1 score, and AUROC. The 19 tested methods are shown in the X-axis. The Violin plots are shown for comparative evaluation of tested methods through (A) TP; (B) FP; (C) PPR; (D) TPR; (E) FPR; (F) Accuracy; (G) FDR; (H) F1 score; and (I) AUROC. The violin plot shows the full distribution of the performance metrics computed through each tested method. The box represents inter-quartile range, the horizontal line represents median, the bars on the boxes shows the 1.5 x inter-quartile range.

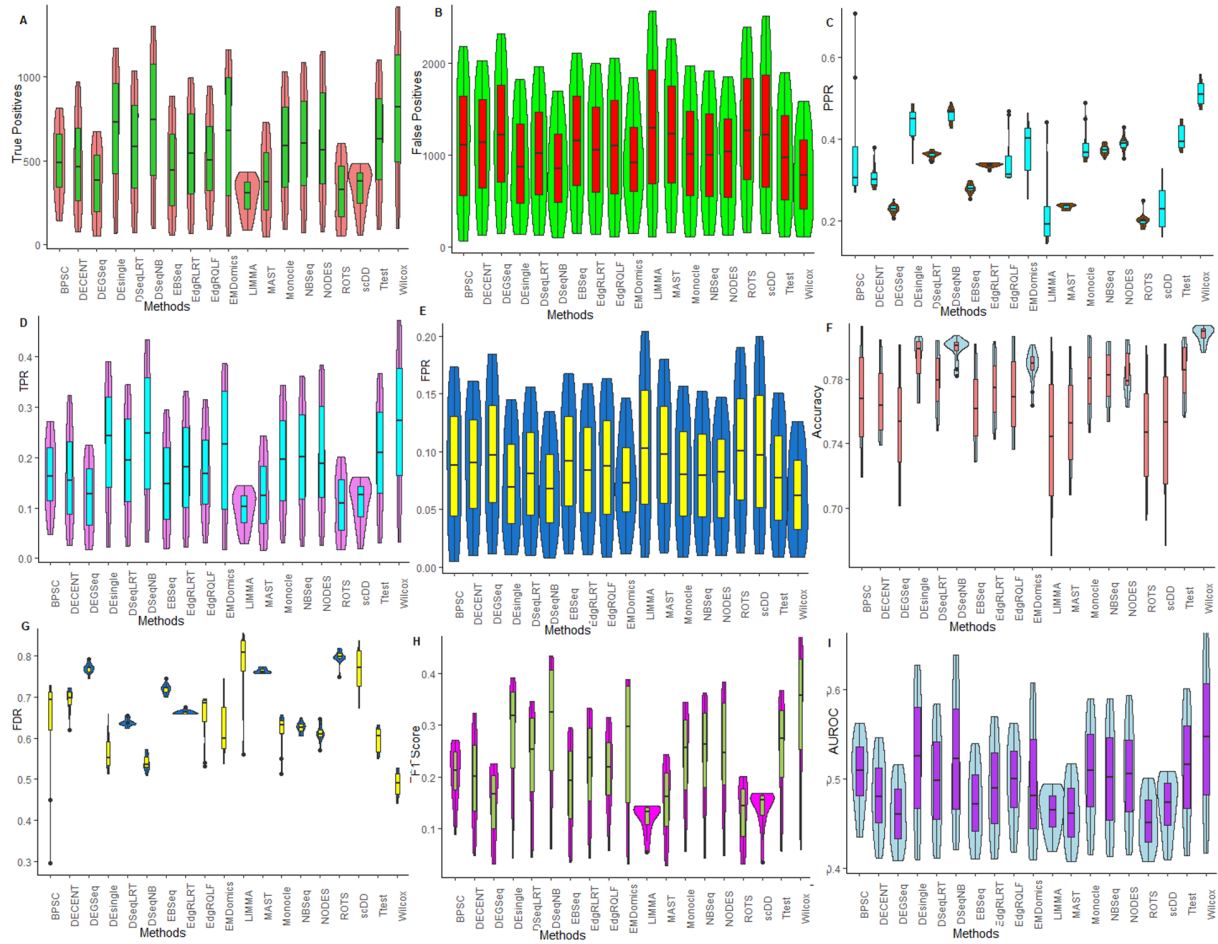

**Figure S12. Comparative performance evaluation of the Differential Expression (DE) methods through the performance metrics for Ziegenhain data.** The tested DE methods are evaluated on the Ziegenhain scRNA-seq data through the performance evaluation metrics, such as TP, FP, TPR, FPR, PPR, FDR, Accuracy, F1 score, and AUROC. The 19 tested methods are shown in the X-axis. The Violin plots are shown for comparative evaluation of tested methods through (A) TP; (B) FP; (C) PPR; (D) TPR; (E) FPR; (F) Accuracy; (G) FDR; (H) F1 score; and (I) AUROC. The violin plot shows the full distribution of the performance metrics computed through each tested method. The box represents interquartile range, the horizontal line represents median, the bars on the boxes shows the 1.5x inter-quartile range.

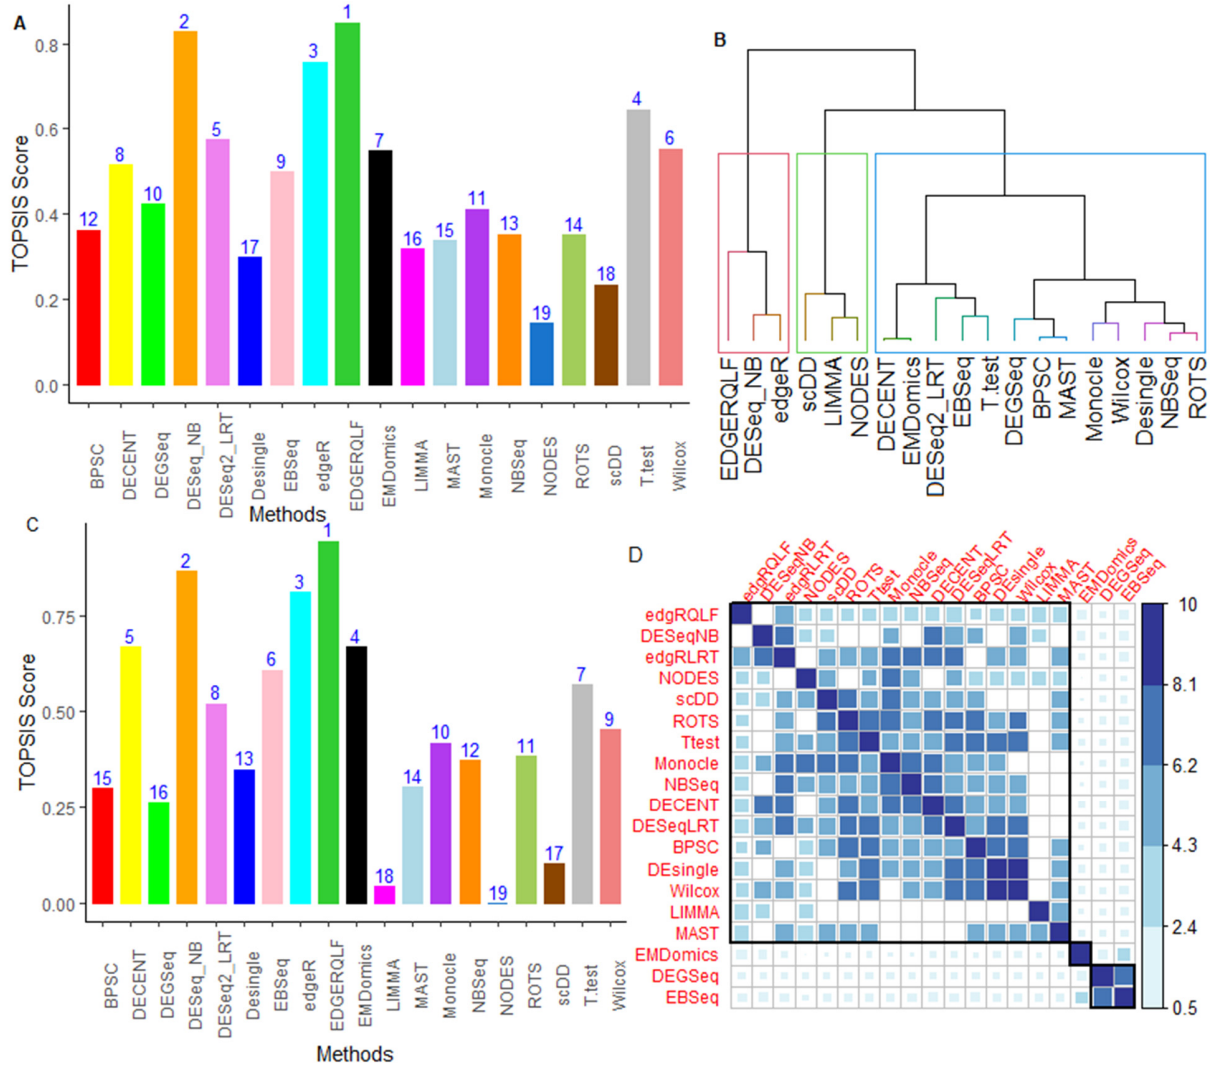

**Figure S13. Performance evaluation of DE methods under Multiple Criteria Decision Making (MCDM) setup for Islam data.** The comparative performance analysis of the 19 tested methods was carried out through TOPSIS approach under MCDM setup on Islam dataset. The MCDM-TOPSIS analysis was carried out under two settings, *i.e.*, (i) multi-criteria including runtime criterion; (ii) multi-criteria excluding runtime criterion. X-axis represents the tested methods and Y-axis represents the TOPSIS scores. The results from the (A) MCDM-TOPSIS analysis of the DE methods are shown for 12 performance metrics including runtime criterion; (B) Average similarities between the evaluated DE methods based on the 13-performance metrics. The dendrogram was obtained by average-linkage hierarchical clustering based on the matrix of average values of performance metrics over all gene sets; (C) MCDM-TOPSIS analysis of the DE methods based on 12 performance metrics excluding runtime criterion; (D) Similarity analysis of the tested methods based on their ability to detect common genes. The statistical

significance values are computed through Binomial test (Supp. Document S12). The strengths of similarity scores are represented in various colors and white empty boxes represents non-significant values.

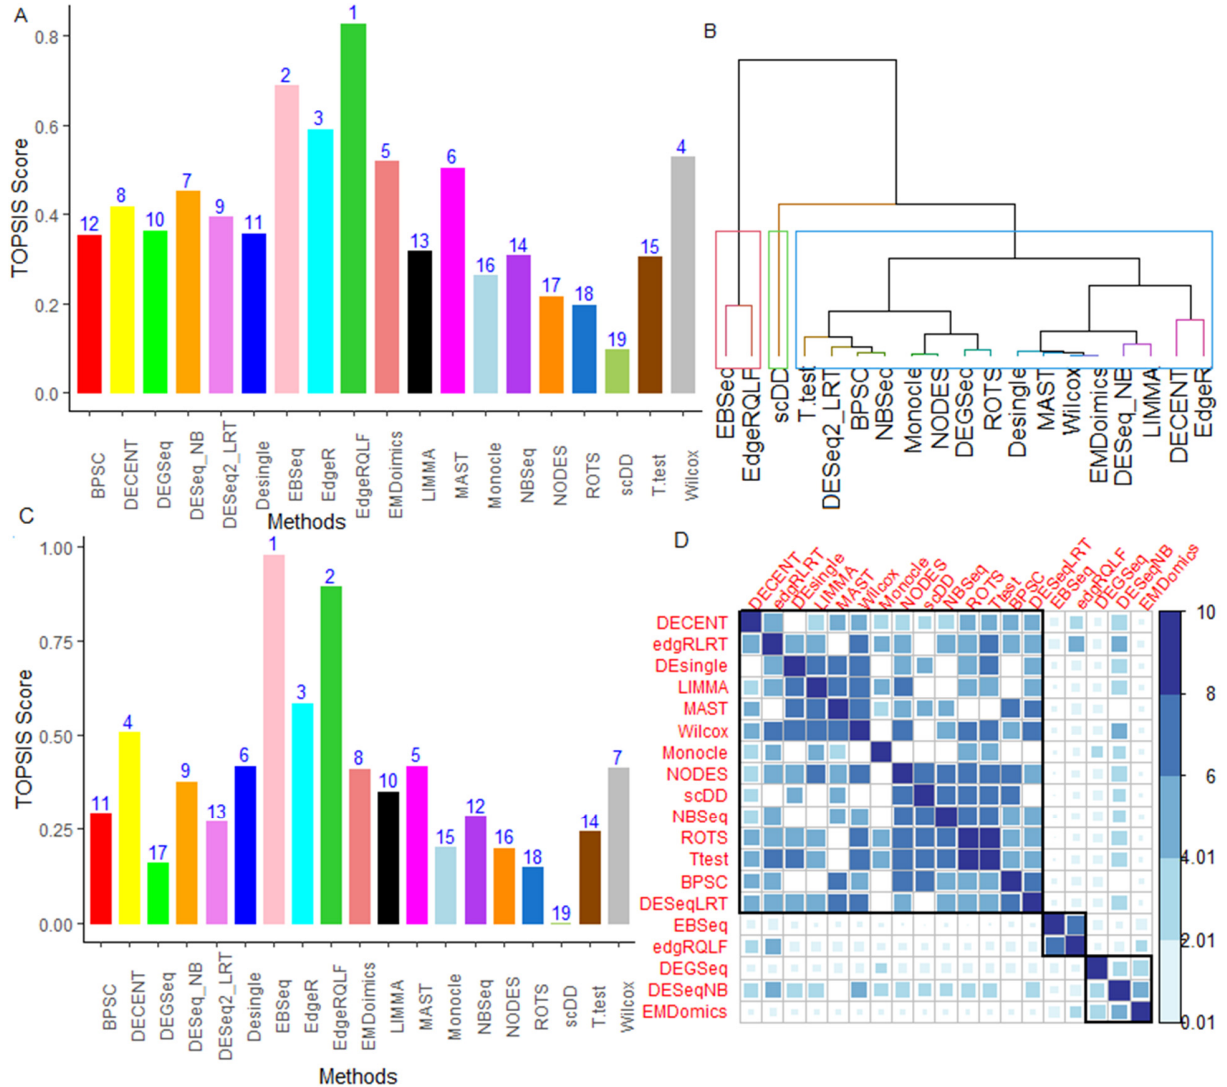

**Figure S14. Performance evaluation of DE methods under the MCDM setup for Tung data.**

The comparative performance analysis of the 19 tested methods was carried out through TOPSIS approach under MCDM setup on Tung dataset. The MCDM-TOPSIS analysis was carried out under two settings, i.e. (i) multi-criteria including runtime criterion (total 13 criteria); (ii) multi-criteria excluding runtime criterion (12 criteria). X-axis represents the tested methods and Y-axis represents the TOPSIS scores. The results from the (A) MCDM-TOPSIS analysis of the DE methods are shown for 13 performance metrics including runtime criterion; (B) Average similarities between the evaluated DE methods based on the 13-performance metrics. The dendrogram was obtained by average-linkage hierarchical clustering based on the matrix of average values of performance metrics over all gene sets; (C) MCDM-TOPSIS analysis of the DE methods



based on 12 performance metrics excluding runtime criterion; (D) Similarity analysis of the tested methods based on their ability to detect common genes. The statistical significance values are computed through Binomial test (Supp. Document S12). The strengths of similarity scores are represented in various colors and white empty boxes represents non-significant values.

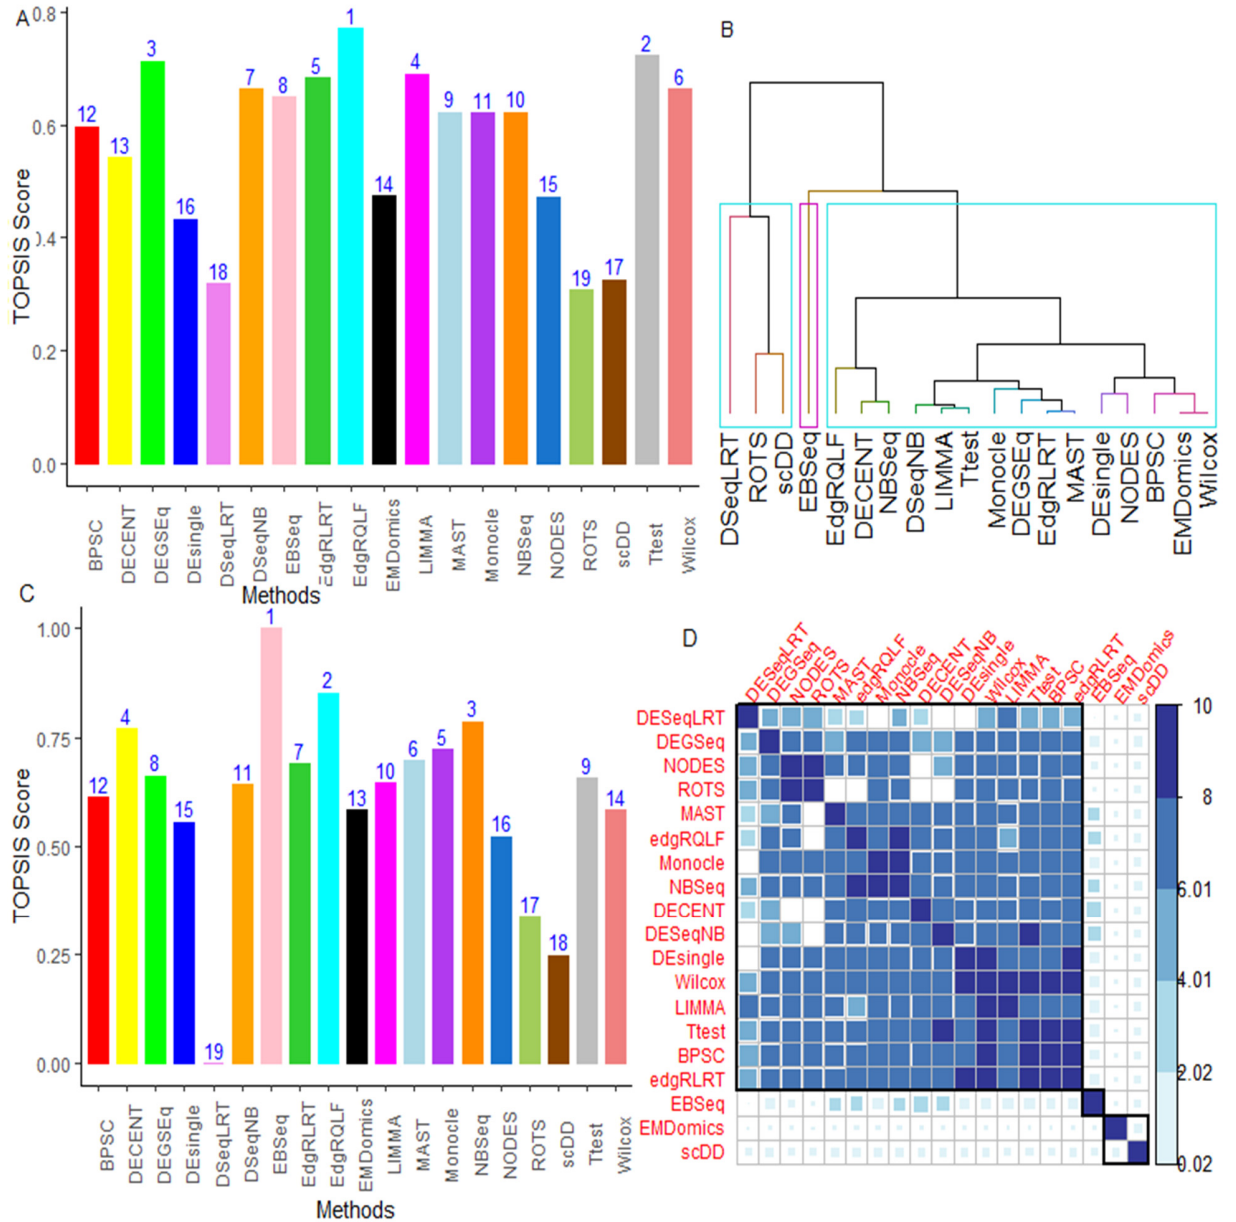

**Figure S15. Performance evaluation of DE methods under the MCDM setup for Soumillion1 data.** The comparative performance analysis of the 19 tested methods was carried out through TOPSIS approach under MCDM setup on Soumillion1 dataset. The MCDM-TOPSIS analysis was carried out under two settings, i.e. (i)

multi-criteria including runtime criterion; (ii) multi-criteria excluding runtime criterion. X-axis represents the tested methods and Y-axis represents the TOPSIS scores. The results from the (A) MCDM-TOPSIS analysis of the DE methods are shown for 12 performance metrics including runtime criterion; (B) Average similarities between the evaluated DE methods based on the 13-performance metrics. The dendrogram was obtained by average-linkage hierarchical clustering based on the matrix of average values of performance metrics over all gene sets; (C) MCDM-TOPSIS analysis of the DE methods based on 12 performance metrics excluding runtime criterion; (D) Similarity analysis of the tested methods based on their ability to detect common genes. The statistical significance values are computed through Binomial test (Supp. Document S12). The strengths of similarity scores are represented in various colors and white empty boxes represents non-significant values.

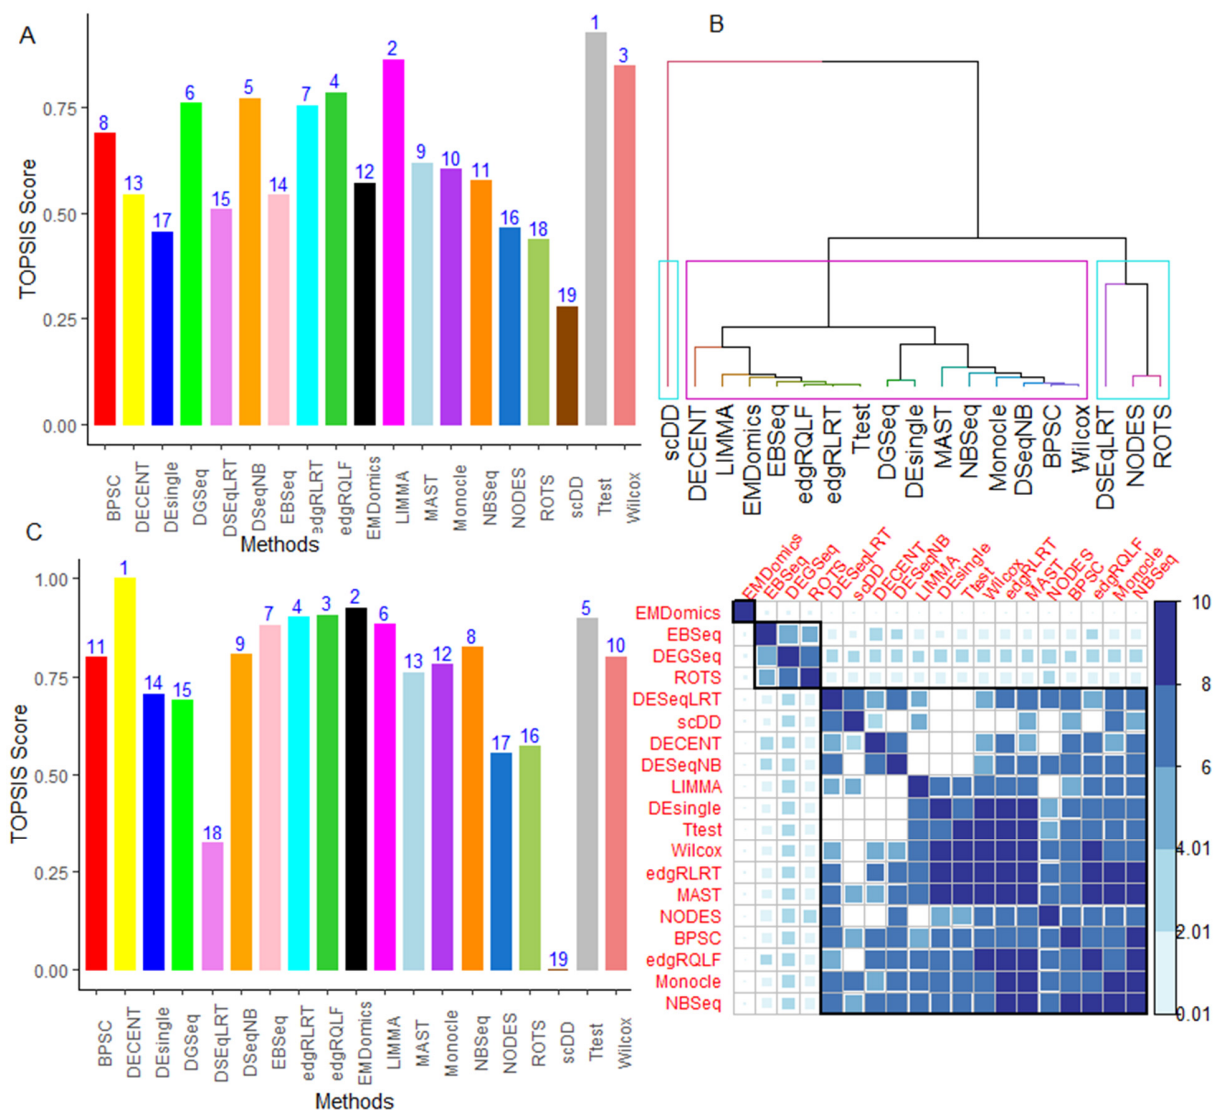

**Figure S16. Performance evaluation of DE methods under the MCDM setup for Soumillion3 data.** The comparative performance analysis of the 19 tested methods was carried out through TOPSIS approach under MCDM setup. X-axis represents the tested methods and Y-axis represents the TOPSIS scores. The results from



the (A) MCDM-TOPSIS analysis of the DE methods are shown for 12 performance metrics including runtime criterion; (B) Average similarities between the evaluated DE methods based on the 13-performance metrics. The dendrogram was obtained by average-linkage hierarchical clustering based on the matrix of average values of performance metrics over all gene sets; (C) MCDM-TOPSIS analysis of the DE methods based on 12 performance metrics excluding runtime criterion; (D) Similarity analysis of the tested methods based on their ability to detect common genes. The strengths of similarity scores are represented in various colors and white empty boxes represents non-significant values.

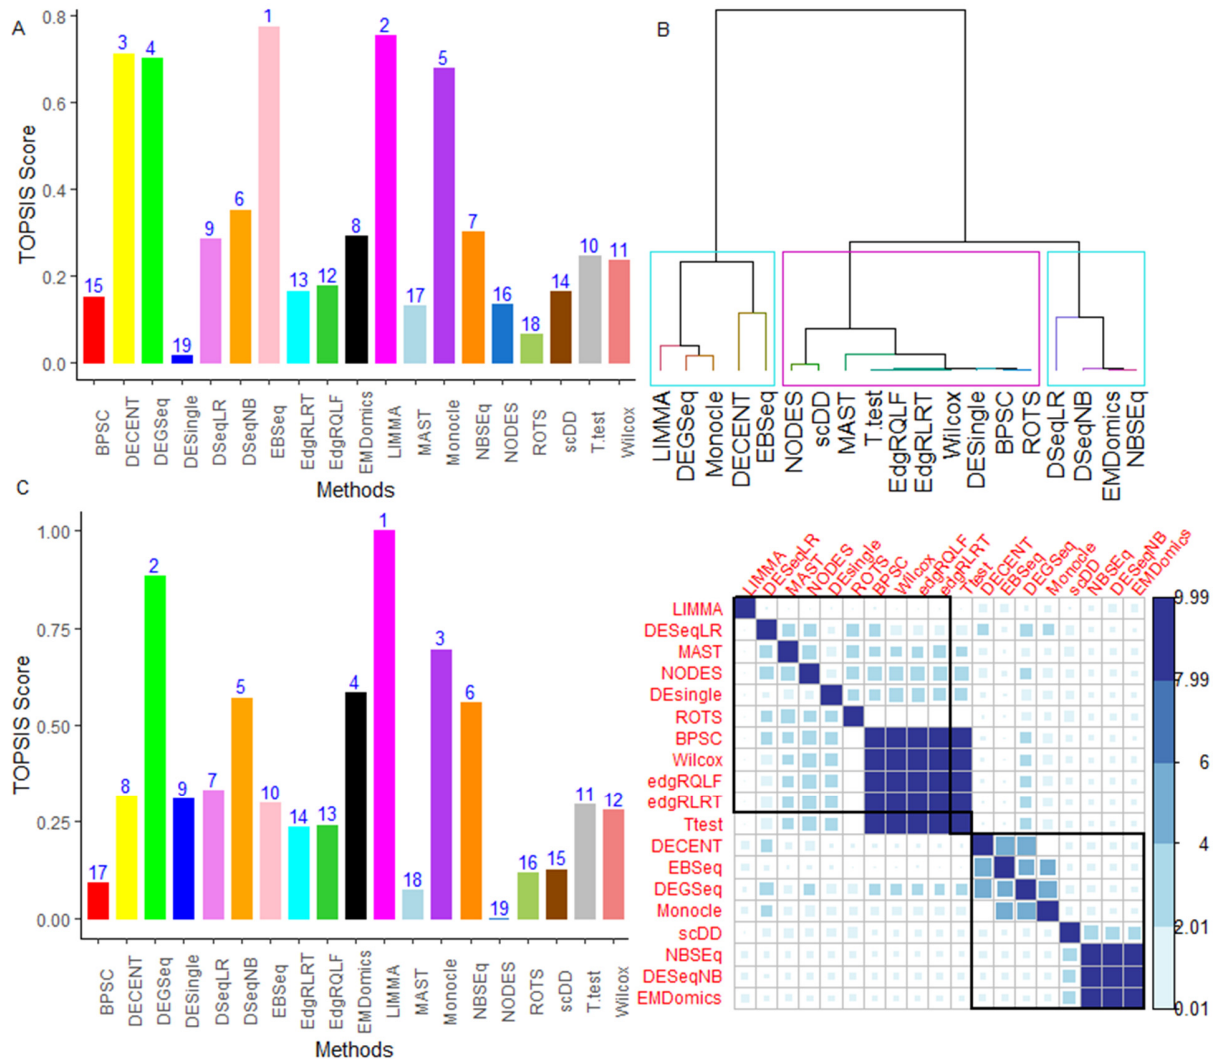

**Figure S17. Performance evaluation of DE methods under the MCDM setup for Klein data.**

The comparative performance analysis of the 19 tested methods was carried out through TOPSIS approach under MCDM setup on Klein dataset. The MCDM-TOPSIS analysis was carried out under two settings, i.e. (i) multi-criteria including runtime criterion; (ii) multi-criteria excluding runtime criterion. X-axis represents the tested methods and Y-axis represents the TOPSIS scores. The results from the (A) MCDM-TOPSIS analysis of the DE methods are shown for 12 performance metrics including runtime criterion; (B) Average similarities between the evaluated DE methods based on the 13-performance metrics. The dendrogram was obtained by average-linkage hierarchical clustering based on the matrix of average values of performance metrics over all gene sets; (C) MCDM-TOPSIS analysis of the DE

methods based on 12 performance metrics excluding runtime criterion; (D) Similarity analysis of the tested methods based on their ability to detect common genes. The strengths of similarity scores are represented in various colors and white empty boxes represent non-significant values at 1% level of significance.

**Figure S18. Performance evaluation of DE methods under the MCDM setup for Gierahn**

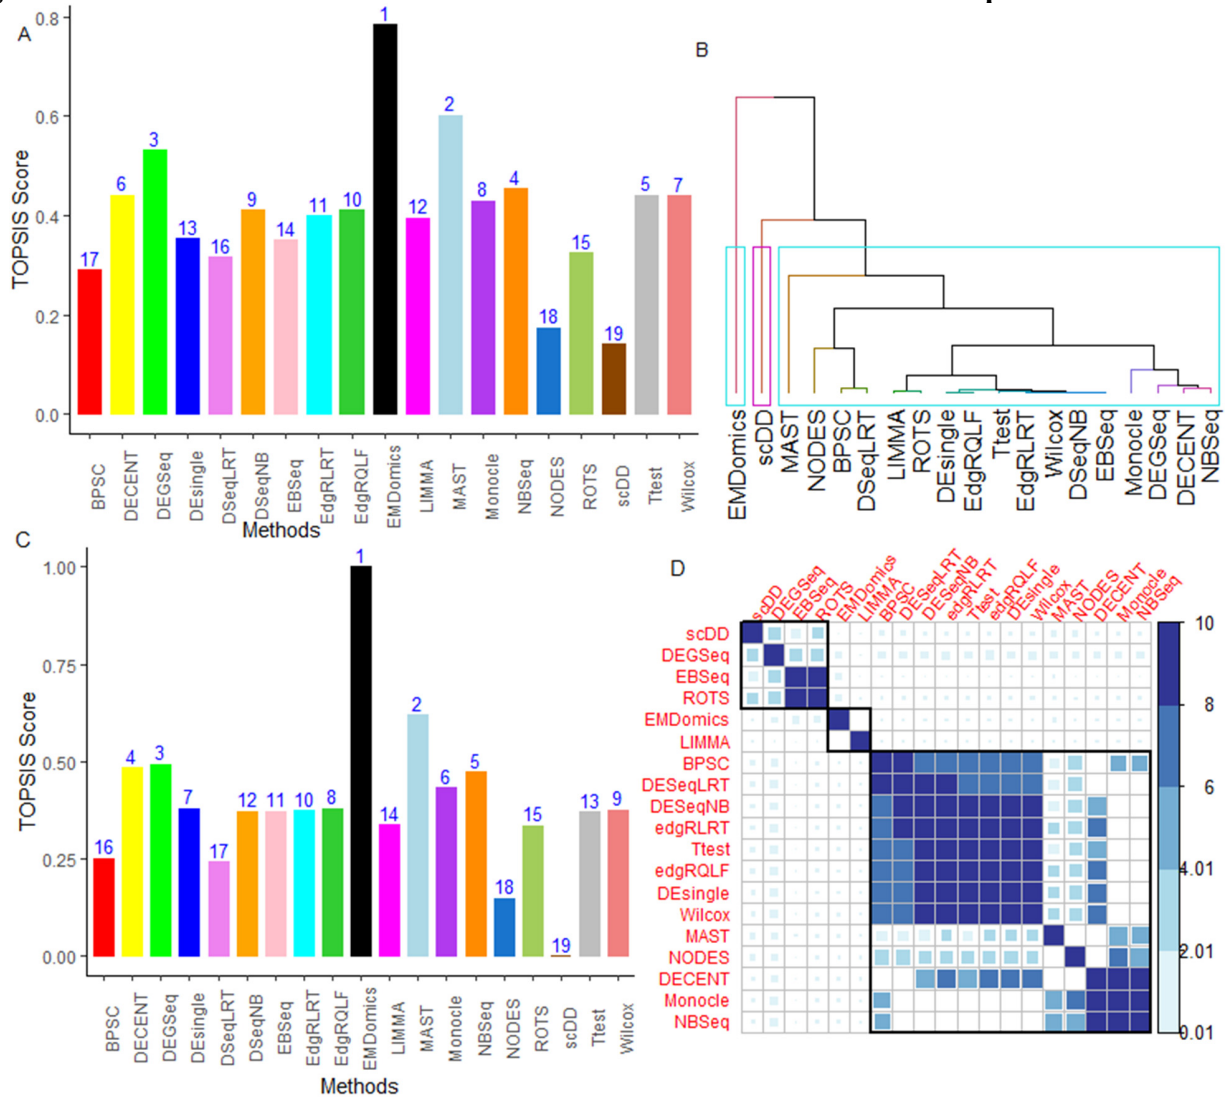

**data.** The comparative performance analysis of the 19 tested methods was carried out through TOPSIS approach under MCDM setup on Gierahn dataset. The MCDM-TOPSIS analysis was carried out under two settings, i.e. (i) multi-criteria including runtime; (ii) multi-criteria excluding runtime. X-axis represents the tested methods and Y-axis represents the TOPSIS scores. The results from the (A) MCDM-TOPSIS analysis of the DE methods are shown for 12 performance metrics including runtime criterion; (B) Average similarities between the evaluated DE methods based on the 13-performance metrics. The dendrogram was obtained by average-linkage hierarchical clustering based on the matrix of average values of performance metrics over all gene sets; (C) MCDM-TOPSIS analysis of the DE methods based on 12 performance metrics excluding runtime criterion; (D) Similarity analysis of the tested methods based on

their ability to detect common genes. The strengths of similarity scores are represented in various colors and white empty boxes represents non-significant values at 1% level of significance.

**Figure S19. Performance evaluation of DE methods under the MCDM setup for Chen data.**

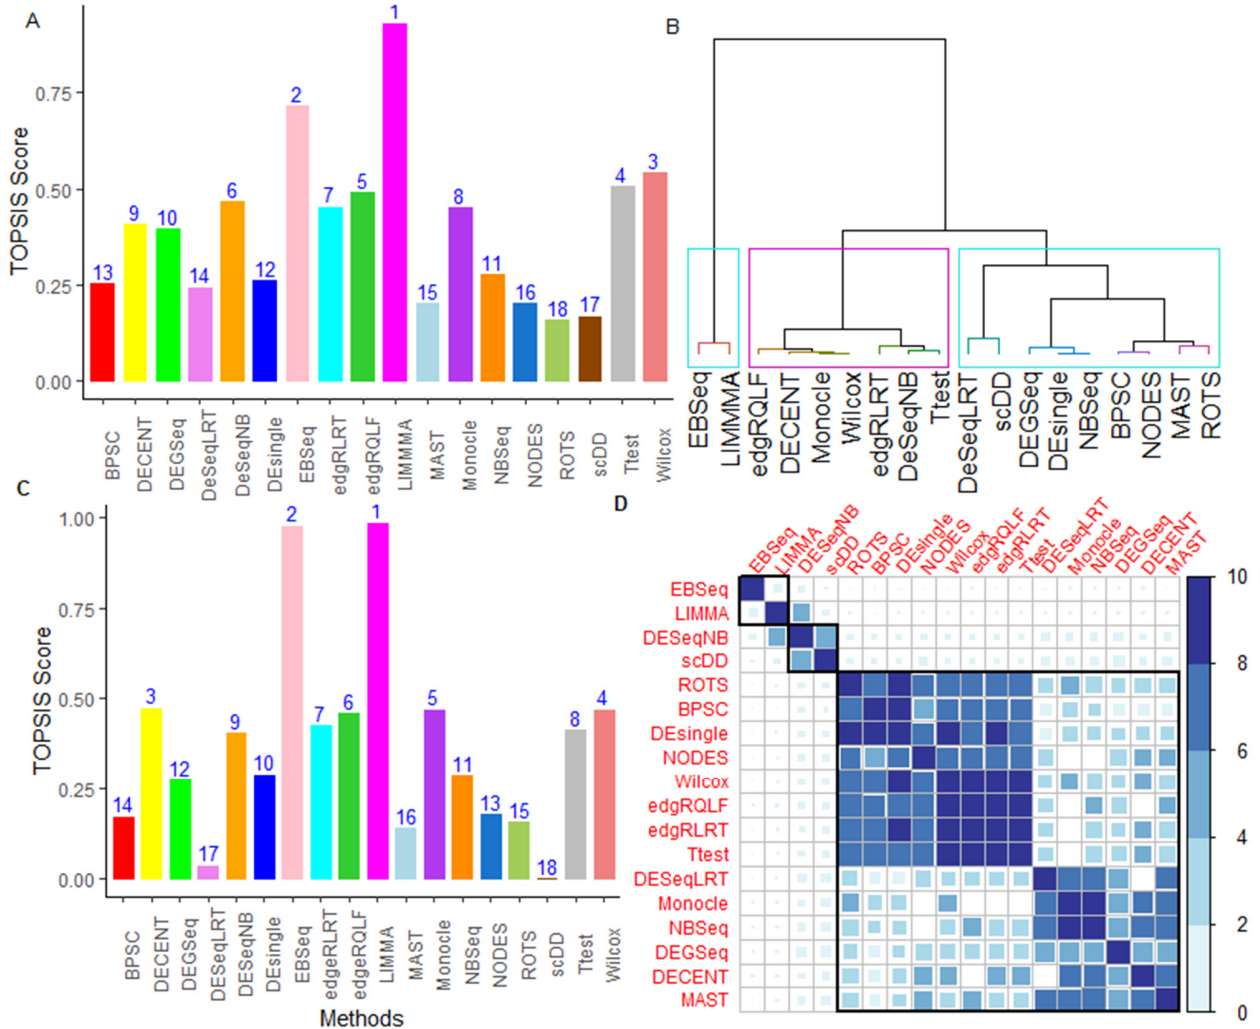

The comparative performance analysis of the 19 tested methods was carried out through TOPSIS approach under MCDM setup on Chen dataset. The MCDM-TOPSIS analysis was carried out under two settings, i.e. (i) multi-criteria including runtime criterion; (ii) multi-criteria excluding runtime criterion. X-axis represents the tested methods and Y-axis represents the TOPSIS scores. The results from the (A) MCDM-TOPSIS analysis of the DE methods are shown for 12 performance metrics including runtime criterion; (B) Average similarities between the evaluated DE methods based on the 13-performance metrics. The dendrogram was obtained by average-linkage hierarchical clustering based on the matrix of average values of performance metrics over all gene sets; (C) MCDM-TOPSIS analysis of the DE methods based on 12 performance metrics excluding runtime criterion; (D) Similarity analysis of the tested methods

based on their ability to detect common genes. The strengths of similarity scores are represented in various colors and white empty boxes represents non-significant values at 1% level of significance.

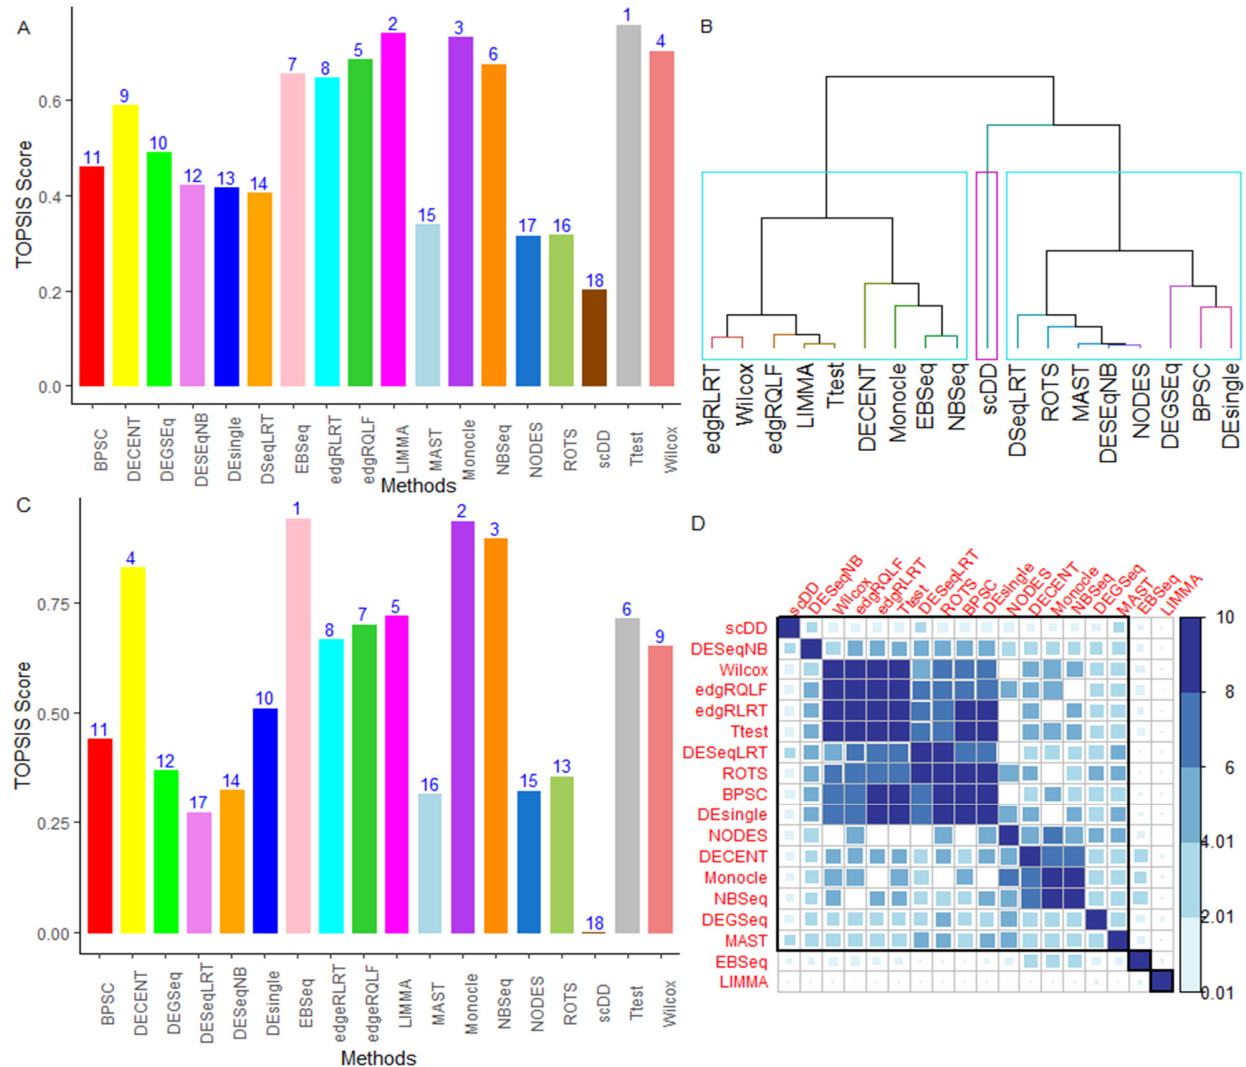

**Figure S20. Performance evaluation of DE methods under the MCDM setup for Savas data.**

The comparative performance analysis of the 19 tested methods was carried out through TOPSIS approach under MCDM setup on Savas dataset. The MCDM-TOPSIS analysis was carried out under two settings, *i.e.*, (i) multi-criteria including runtime criterion; (ii) multi-criteria excluding runtime criterion. X-axis represents the tested methods and Y-axis represents the TOPSIS scores. The results from the (A) MCDM-TOPSIS analysis of the DE methods are shown for 12 performance metrics including runtime criterion; (B) Average similarities between the evaluated DE methods based on the 13-performance metrics. The dendrogram was obtained by average-linkage hierarchical clustering based on the matrix of average values of performance metrics over all gene sets; (C) MCDM-TOPSIS analysis of the DE methods based on 12 performance metrics excluding runtime criterion; (D) Similarity analysis of the tested methods based on their ability to detect common genes. The strengths of similarity scores are represented in various colors and

white empty boxes represents non-significant values similarity scores are represented in various colors and white empty boxes represent non-significant values at 1% level of significance.

**Figure S21. Performance evaluation of DE methods under the MCDM setup for Grun data.**

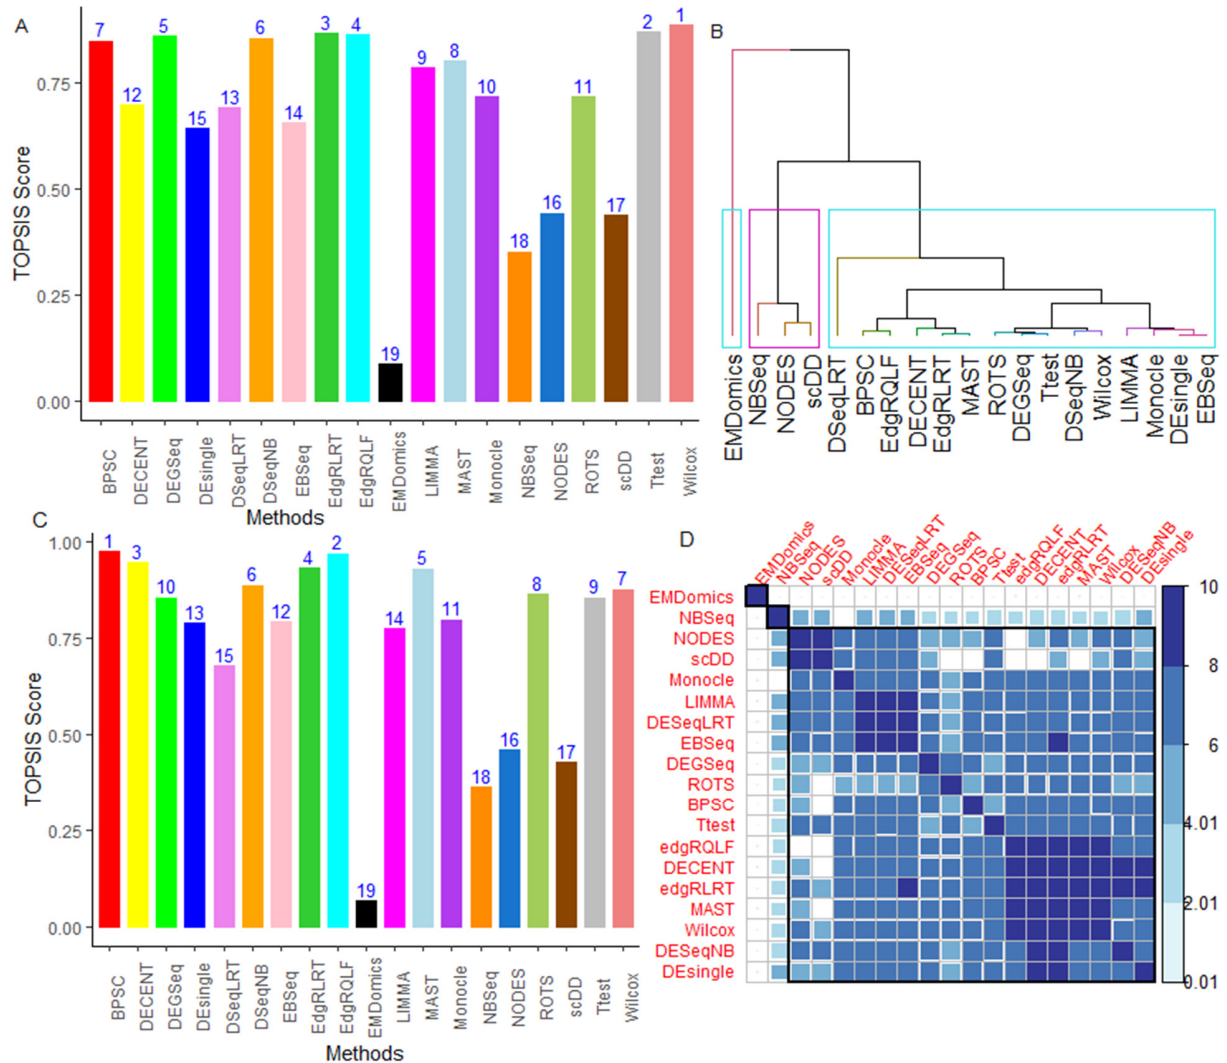

The comparative performance analysis of the 19 tested methods was carried out through TOPSIS approach under MCDM setup on Grun dataset. The MCDM-TOPSIS analysis was carried out under two settings, i.e. (i) multi-criteria including runtime criterion; (ii) multi-criteria excluding runtime criterion. X-axis represents the tested methods and Y-axis represents the TOPSIS scores. The results from the (A) MCDM-TOPSIS analysis of the DE methods are shown for 12 performance metrics including runtime criterion; (B) Average similarities between the evaluated DE methods based on the 13-performance metrics. The dendrogram was obtained by average-linkage hierarchical clustering based on the matrix of average values of performance metrics over all gene sets; (C) MCDM-TOPSIS analysis of the DE methods based on 12 performance metrics excluding runtime criterion; (D) Similarity analysis of the tested methods based on their ability to detect common genes. The strengths of similarity scores are represented in various colors and white empty boxes represent non-significant values at 1% level of significance.



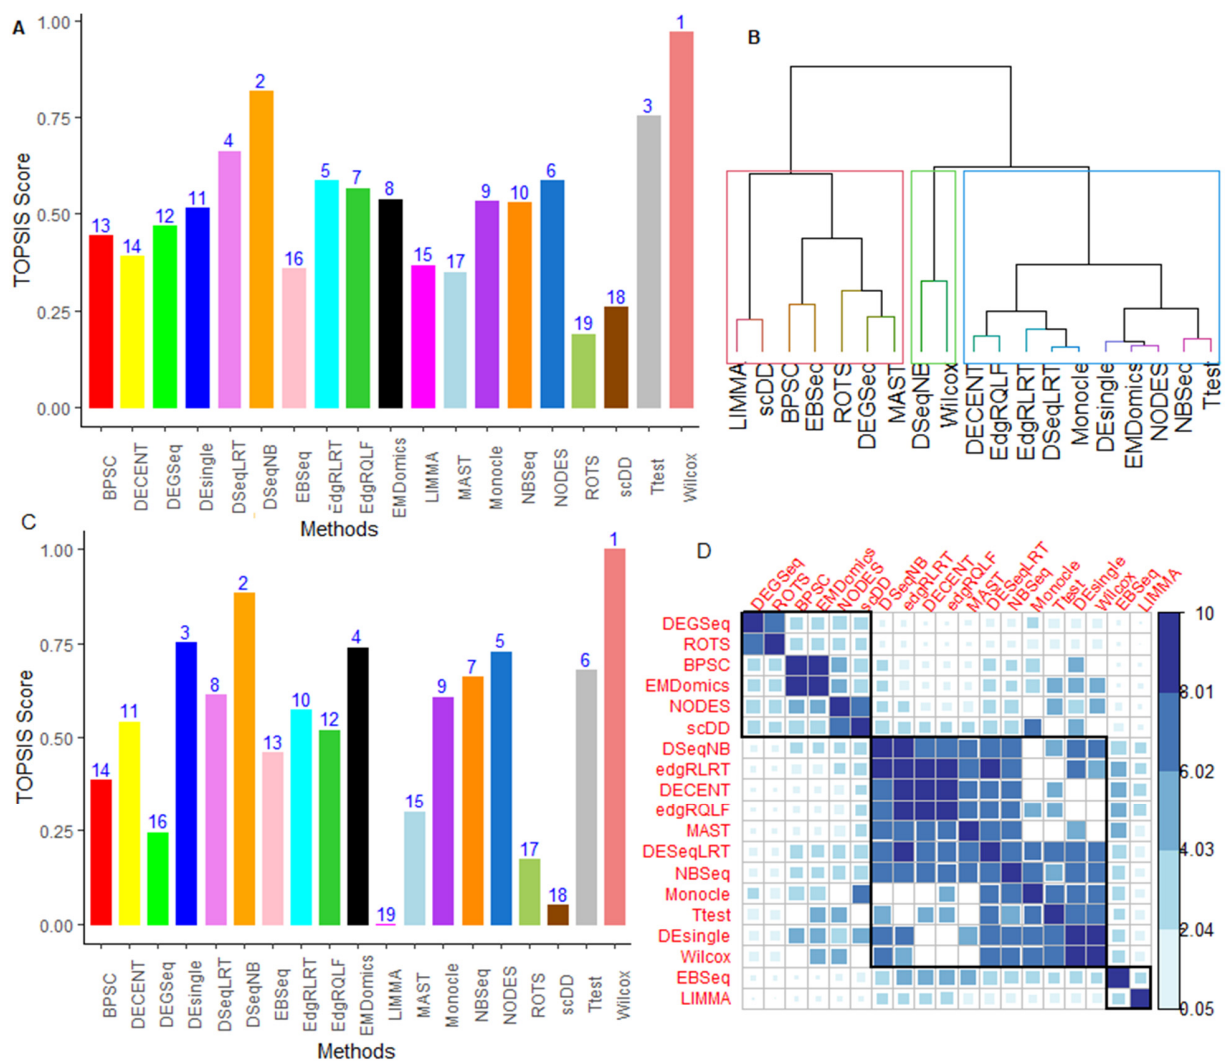

**Figure S22. Performance evaluation of DE methods under the MCDM for Ziegenhain data.**

The comparative performance analysis of the 19 tested methods was carried out through TOPSIS approach under MCDM setup on Ziegenhain dataset. The MCDM-TOPSIS analysis was carried out under two settings, i.e. (i) multi-criteria including runtime criterion; (ii) multi-criteria excluding runtime criterion. X-axis represents the tested methods and Y-axis represents the TOPSIS scores. The results from the (A) MCDM-TOPSIS analysis of the DE methods are shown for 12 performance metrics including runtime criterion; (B) Average similarities between the evaluated DE methods based on the 13-performance metrics. The dendrogram was obtained by average-linkage hierarchical clustering based on the matrix of average values of performance metrics over all gene sets; (C) MCDM-TOPSIS analysis of the DE methods based on 12 performance metrics excluding runtime criterion; (D) Similarity analysis of the tested methods based on their ability to detect common genes. The strengths of similarity scores are represented in various colors and white empty boxes represents non-significant values at 1% level of significance.

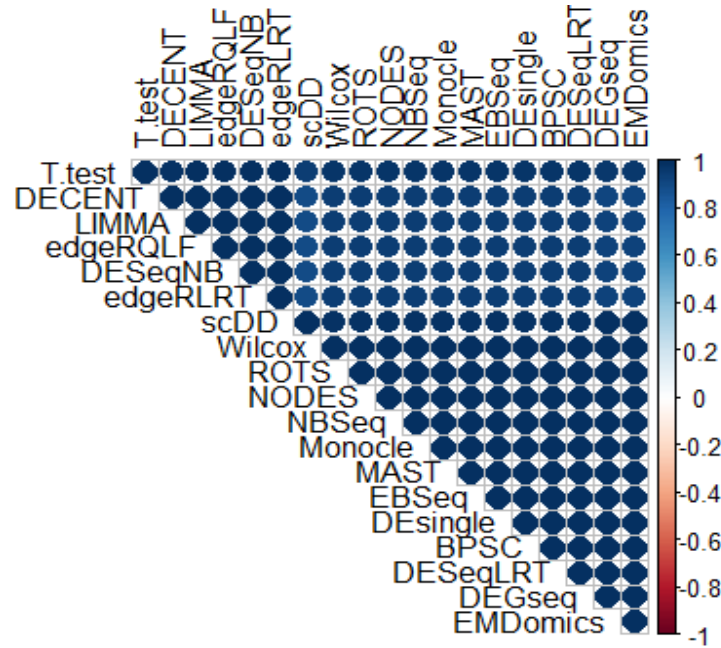

**Figure S23.** Correlation plot for the tested methods over the computed performance metrics for Soumillon2 data. The correlation measures are computed through Spearman's rank correlation and the correlation measures are shown for  $p\text{-value} < 0.01$ .

**Figure S24.** Correlation plot for the tested methods over the computed performance metrics for the real scRNA-seq data. The correlation plot is shown for (A) Islam (B) Tung (C) Ziegenhain (D) Soumillon1 (E) Soumillon3 (F) Klein (G) Grun (H) Gierahn. The correlation measures are computed through Spearman's rank correlation and the correlation measures are shown for  $p\text{-value} < 0.01$ .

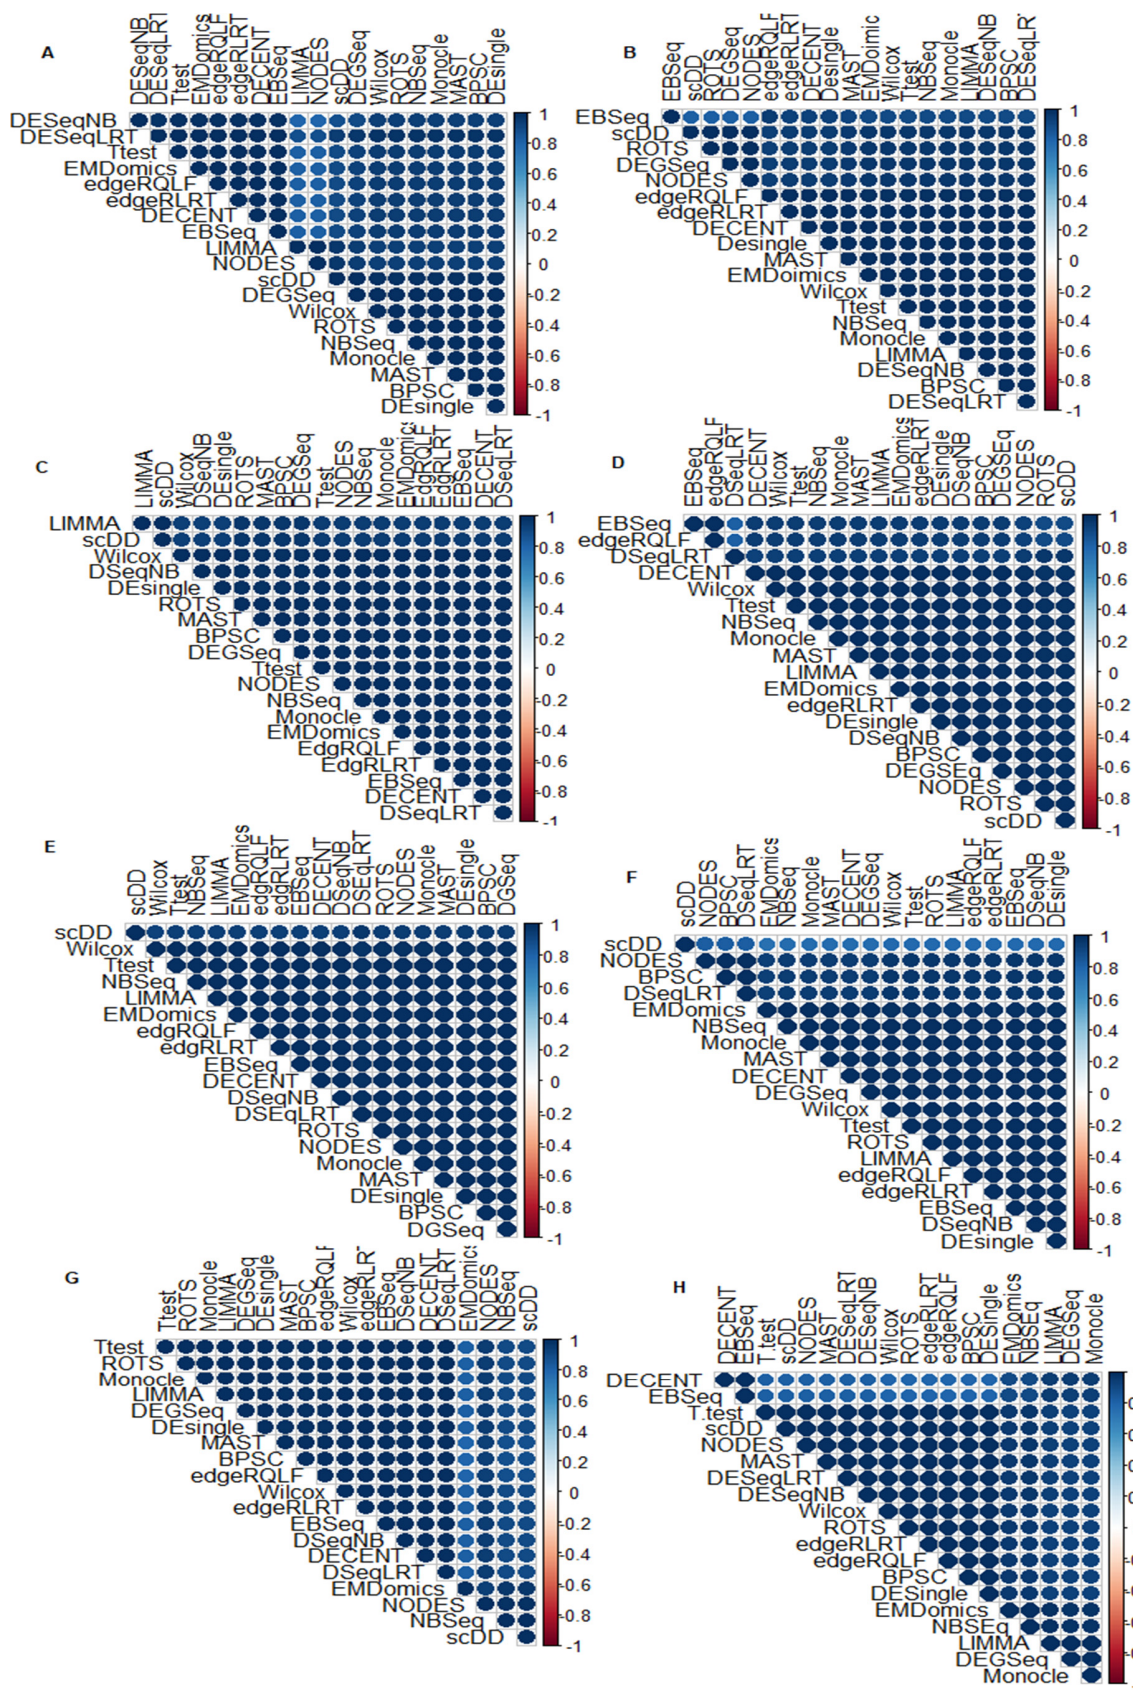



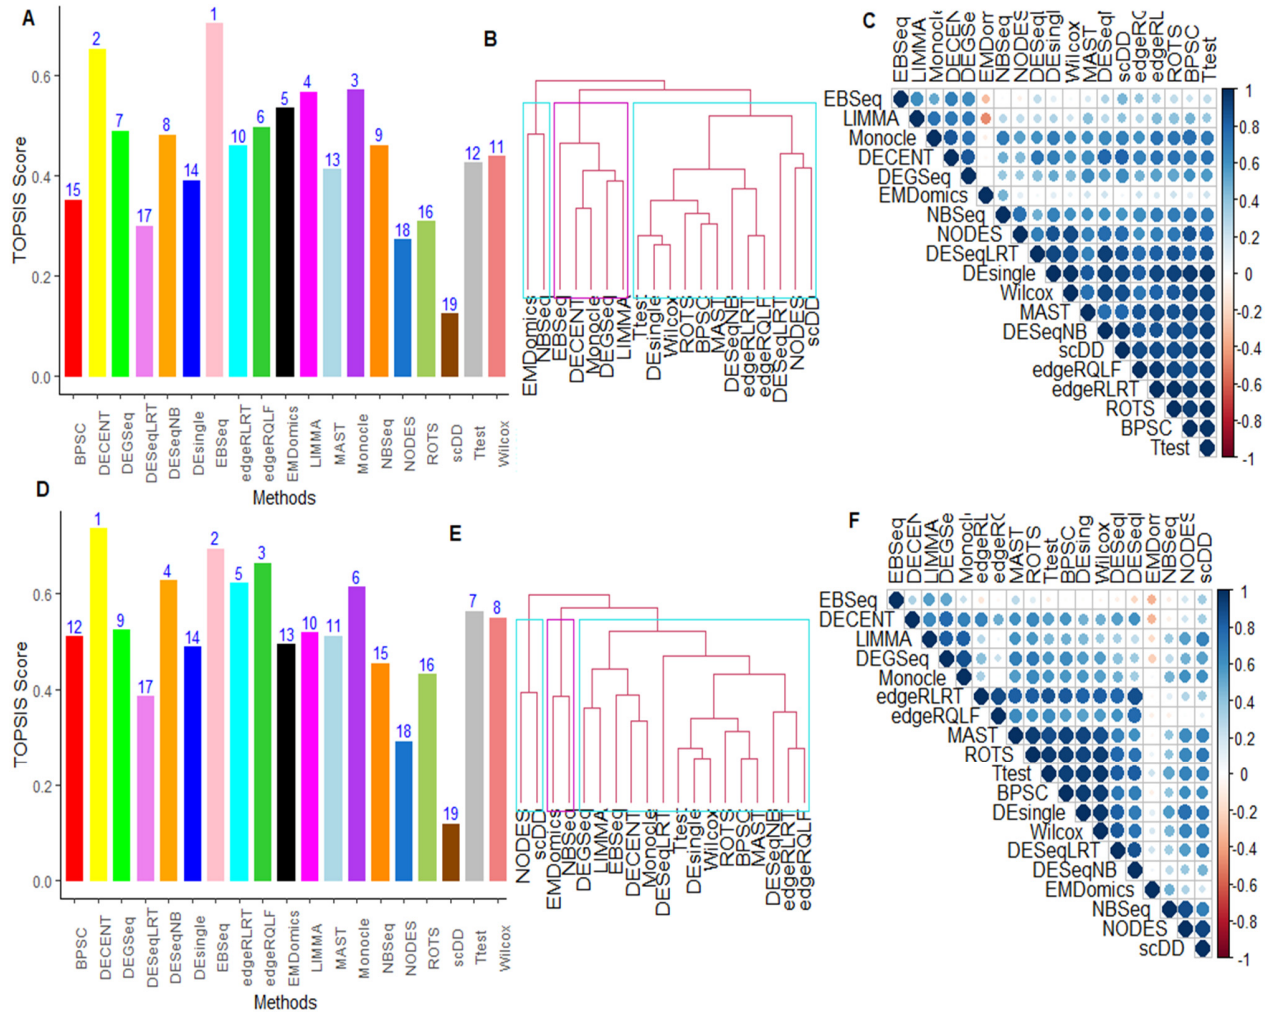

**Figure S25. Combined data analysis of the DE methods based on TPR and FPR metrics through TOPSIS Approach.** The comparative performance evaluation of the DE methods was performed based on TPR and FPR metrics through TOPSIS approach under multi-data setup. This analysis was performed on data matrix having TPR and FPR scores of the tested methods across the 11 considered datasets. (A) Shows results from TOPSIS analysis of the tested DE methods based on TPR; (B) Similarity analysis of the evaluated DE methods based on TPR through clustering. The dendrogram was obtained by average-linkage hierarchical clustering based on the matrix of average (over DE gene sets) TPR scores across all data sets. (C) Similarity analysis of the evaluated DE methods based on TPR through correlation. The correlation plot was obtained by Spearman's rank correlation method based on the matrix of average (over DE gene sets) TPR scores across all data sets; (D) Shows results from TOPSIS analysis of the tested DE methods based on FPR; (E) Similarity analysis of the evaluated DE methods based on FPR through clustering. The dendrogram was obtained by average-linkage hierarchical clustering based on the matrix of

average (over DE gene sets) FPR across all data sets. (F) Similarity analysis of the evaluated DE methods based on FPR metrics through correlation. The correlation plot was obtained by Spearman's rank correlation method based on the matrix of average (over DE gene sets) FPR scores across all data sets.

**Figure S26. Combined data analysis of the DE methods based on AUROC metrics through**

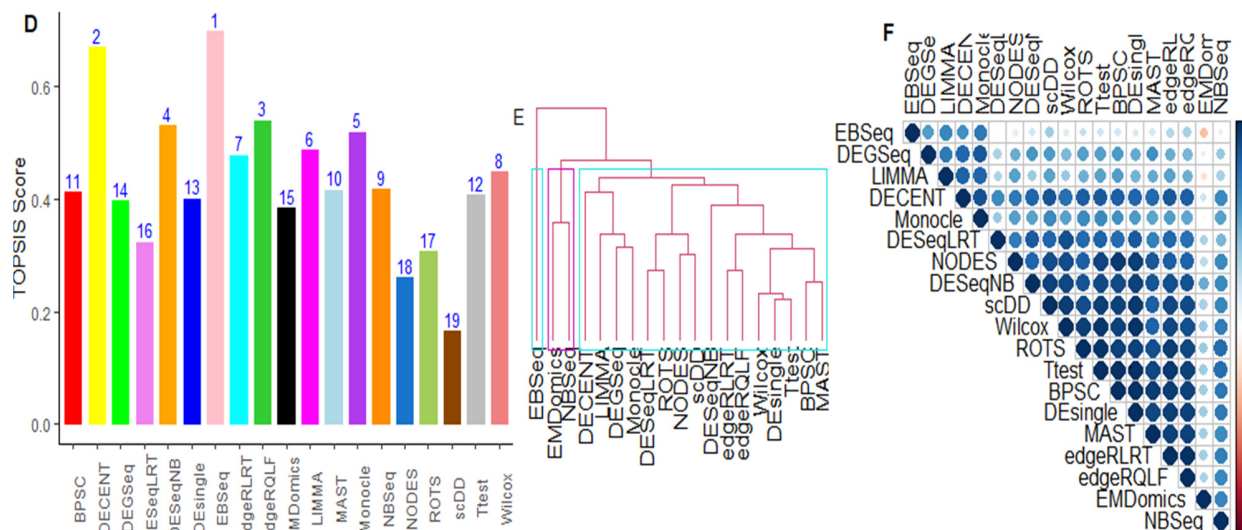

**TOPSIS Approach.** The comparative performance evaluation of the DE methods was performed based on AUROC metrics through TOPSIS approach under multi-data setup. This analysis was performed on data matrix having AUROC scores of the tested methods across the 11 considered datasets. (A) Shows results from TOPSIS analysis of the tested DE methods based on AUROC; (B) Similarity analysis of the evaluated DE methods based on AUROC through clustering. The dendrogram was obtained by average-linkage hierarchical clustering based on the matrix of average (over DE gene sets) AUROC scores across all data sets. (C) Similarity analysis of the evaluated DE methods based on AUROC through correlation. The correlation plot was obtained by Spearman's rank correlation method based on the matrix of average (over DE gene sets) AUROC scores across all data sets.

**Table S8.** Evaluation of DE methods based on performance evaluation metrics for Soumillon2 scRNA-seq data.

| Methods | TP | FP | TN | FN | TPR | FPR | FDR | PPR | NPV | ACC | F1 | AUROC |
|---------|----|----|----|----|-----|-----|-----|-----|-----|-----|----|-------|
|---------|----|----|----|----|-----|-----|-----|-----|-----|-----|----|-------|

| DEG = 500  |     |     |       |      |       |       |       |       |       |       |       |       |
|------------|-----|-----|-------|------|-------|-------|-------|-------|-------|-------|-------|-------|
| BPSC       | 351 | 149 | 12486 | 2649 | 0.117 | 0.012 | 0.298 | 0.702 | 0.825 | 0.821 | 0.201 | 0.472 |
| DECENT     | 490 | 10  | 12625 | 2510 | 0.163 | 0.001 | 0.020 | 0.980 | 0.834 | 0.839 | 0.280 | 0.541 |
| DEGseq     | 173 | 327 | 12308 | 2827 | 0.058 | 0.026 | 0.654 | 0.346 | 0.813 | 0.798 | 0.099 | 0.430 |
| DESeqNB    | 443 | 57  | 12578 | 2557 | 0.148 | 0.005 | 0.114 | 0.886 | 0.831 | 0.833 | 0.253 | 0.513 |
| DESeqLRT   | 308 | 192 | 12443 | 2692 | 0.103 | 0.015 | 0.384 | 0.616 | 0.822 | 0.816 | 0.176 | 0.461 |
| DEsingle   | 324 | 176 | 12459 | 2676 | 0.108 | 0.014 | 0.352 | 0.648 | 0.823 | 0.818 | 0.185 | 0.457 |
| EBSeq      | 263 | 237 | 12398 | 2737 | 0.088 | 0.019 | 0.474 | 0.526 | 0.819 | 0.810 | 0.150 | 0.441 |
| edgeRLRT   | 339 | 161 | 12474 | 2661 | 0.113 | 0.013 | 0.322 | 0.678 | 0.824 | 0.820 | 0.194 | 0.467 |
| edgeRQLF   | 414 | 86  | 12549 | 2586 | 0.138 | 0.007 | 0.172 | 0.828 | 0.829 | 0.829 | 0.237 | 0.479 |
| EMDomics   | 331 | 169 | 12466 | 2669 | 0.110 | 0.013 | 0.338 | 0.662 | 0.824 | 0.818 | 0.189 | 0.484 |
| LIMMA      | 347 | 153 | 12482 | 2653 | 0.116 | 0.012 | 0.306 | 0.694 | 0.825 | 0.821 | 0.198 | 0.458 |
| MAST       | 309 | 191 | 12444 | 2691 | 0.103 | 0.015 | 0.382 | 0.618 | 0.822 | 0.816 | 0.177 | 0.461 |
| Monocle    | 283 | 217 | 12418 | 2717 | 0.094 | 0.017 | 0.434 | 0.566 | 0.820 | 0.812 | 0.162 | 0.448 |
| NBSeq      | 335 | 165 | 12470 | 2665 | 0.112 | 0.013 | 0.330 | 0.670 | 0.824 | 0.819 | 0.191 | 0.463 |
| NODES      | 221 | 279 | 12356 | 2779 | 0.074 | 0.022 | 0.558 | 0.442 | 0.816 | 0.804 | 0.126 | 0.439 |
| ROTS       | 231 | 269 | 12366 | 2769 | 0.077 | 0.021 | 0.538 | 0.462 | 0.817 | 0.806 | 0.132 | 0.441 |
| scDD       | 175 | 325 | 12310 | 2825 | 0.058 | 0.026 | 0.650 | 0.350 | 0.813 | 0.799 | 0.100 | 0.433 |
| T-test     | 322 | 178 | 12457 | 2678 | 0.107 | 0.014 | 0.356 | 0.644 | 0.823 | 0.817 | 0.184 | 0.461 |
| Wilcox     | 309 | 191 | 12444 | 2691 | 0.103 | 0.015 | 0.382 | 0.618 | 0.822 | 0.816 | 0.177 | 0.459 |
| DEG = 1000 |     |     |       |      |       |       |       |       |       |       |       |       |
| BPSC       | 639 | 361 | 12274 | 2361 | 0.213 | 0.029 | 0.361 | 0.639 | 0.839 | 0.826 | 0.320 | 0.529 |
| DECENT     | 914 | 86  | 12549 | 2086 | 0.305 | 0.007 | 0.086 | 0.914 | 0.857 | 0.861 | 0.457 | 0.641 |
| DEGseq     | 368 | 632 | 12003 | 2632 | 0.123 | 0.050 | 0.632 | 0.368 | 0.820 | 0.791 | 0.184 | 0.461 |
| DESeqNB    | 813 | 187 | 12448 | 2187 | 0.271 | 0.015 | 0.187 | 0.813 | 0.851 | 0.848 | 0.407 | 0.586 |
| DESeqLRT   | 555 | 445 | 12190 | 2445 | 0.185 | 0.035 | 0.445 | 0.555 | 0.833 | 0.815 | 0.278 | 0.509 |
| DEsingle   | 620 | 380 | 12255 | 2380 | 0.207 | 0.030 | 0.380 | 0.620 | 0.837 | 0.823 | 0.310 | 0.513 |
| EBSeq      | 553 | 447 | 12188 | 2447 | 0.184 | 0.035 | 0.447 | 0.553 | 0.833 | 0.815 | 0.277 | 0.487 |
| edgeRLRT   | 650 | 350 | 12285 | 2350 | 0.217 | 0.028 | 0.350 | 0.650 | 0.839 | 0.827 | 0.325 | 0.525 |
| edgeRQLF   | 761 | 239 | 12396 | 2239 | 0.254 | 0.019 | 0.239 | 0.761 | 0.847 | 0.842 | 0.381 | 0.557 |
| EMDomics   | 461 | 539 | 12096 | 2539 | 0.154 | 0.043 | 0.539 | 0.461 | 0.827 | 0.803 | 0.231 | 0.521 |
| LIMMA      | 683 | 317 | 12318 | 2317 | 0.228 | 0.025 | 0.317 | 0.683 | 0.842 | 0.832 | 0.342 | 0.516 |
| MAST       | 591 | 409 | 12226 | 2409 | 0.197 | 0.032 | 0.409 | 0.591 | 0.835 | 0.820 | 0.296 | 0.511 |
| Monocle    | 573 | 427 | 12208 | 2427 | 0.191 | 0.034 | 0.427 | 0.573 | 0.834 | 0.817 | 0.287 | 0.497 |
| NBSeq      | 638 | 362 | 12273 | 2362 | 0.213 | 0.029 | 0.362 | 0.638 | 0.839 | 0.826 | 0.319 | 0.519 |
| NODES      | 433 | 567 | 12068 | 2567 | 0.144 | 0.045 | 0.567 | 0.433 | 0.825 | 0.800 | 0.217 | 0.474 |
| ROTS       | 472 | 528 | 12107 | 2528 | 0.157 | 0.042 | 0.528 | 0.472 | 0.827 | 0.805 | 0.236 | 0.479 |
| scDD       | 325 | 675 | 11960 | 2675 | 0.108 | 0.053 | 0.675 | 0.325 | 0.817 | 0.786 | 0.163 | 0.459 |
| T-test     | 627 | 373 | 12262 | 2373 | 0.209 | 0.030 | 0.373 | 0.627 | 0.838 | 0.824 | 0.314 | 0.514 |
| Wilcox     | 594 | 406 | 12229 | 2406 | 0.198 | 0.032 | 0.406 | 0.594 | 0.836 | 0.820 | 0.297 | 0.509 |
| DEG = 1500 |     |     |       |      |       |       |       |       |       |       |       |       |
| BPSC       | 906 | 594 | 12041 | 2094 | 0.302 | 0.047 | 0.396 | 0.604 | 0.852 | 0.828 | 0.403 | 0.580 |

|            |      |      |       |      |       |       |       |       |       |       |       |       |
|------------|------|------|-------|------|-------|-------|-------|-------|-------|-------|-------|-------|
| DECENT     | 1211 | 289  | 12346 | 1789 | 0.404 | 0.023 | 0.193 | 0.807 | 0.873 | 0.867 | 0.538 | 0.728 |
| DEGseq     | 556  | 944  | 11691 | 2444 | 0.185 | 0.075 | 0.629 | 0.371 | 0.827 | 0.783 | 0.247 | 0.492 |
| DESeqNB    | 1096 | 404  | 12231 | 1904 | 0.365 | 0.032 | 0.269 | 0.731 | 0.865 | 0.852 | 0.487 | 0.659 |
| DESeqLRT   | 773  | 727  | 11908 | 2227 | 0.258 | 0.058 | 0.485 | 0.515 | 0.842 | 0.811 | 0.344 | 0.554 |
| DEsingle   | 882  | 618  | 12017 | 2118 | 0.294 | 0.049 | 0.412 | 0.588 | 0.850 | 0.825 | 0.392 | 0.566 |
| EBSeq      | 785  | 715  | 11920 | 2215 | 0.262 | 0.057 | 0.477 | 0.523 | 0.843 | 0.813 | 0.349 | 0.538 |
| edgeRLRT   | 934  | 566  | 12069 | 2066 | 0.311 | 0.045 | 0.377 | 0.623 | 0.854 | 0.832 | 0.415 | 0.578 |
| edgeQLF    | 980  | 520  | 12115 | 2020 | 0.327 | 0.041 | 0.347 | 0.653 | 0.857 | 0.838 | 0.436 | 0.631 |
| EMDomics   | 538  | 962  | 11673 | 2462 | 0.179 | 0.076 | 0.641 | 0.359 | 0.826 | 0.781 | 0.239 | 0.540 |
| LIMMA      | 1011 | 489  | 12146 | 1989 | 0.337 | 0.039 | 0.326 | 0.674 | 0.859 | 0.842 | 0.449 | 0.573 |
| MAST       | 828  | 672  | 11963 | 2172 | 0.276 | 0.053 | 0.448 | 0.552 | 0.846 | 0.818 | 0.368 | 0.560 |
| Monocle    | 843  | 657  | 11978 | 2157 | 0.281 | 0.052 | 0.438 | 0.562 | 0.847 | 0.820 | 0.375 | 0.546 |
| NBSeq      | 903  | 597  | 12038 | 2097 | 0.301 | 0.047 | 0.398 | 0.602 | 0.852 | 0.828 | 0.401 | 0.574 |
| NODES      | 681  | 819  | 11816 | 2319 | 0.227 | 0.065 | 0.546 | 0.454 | 0.836 | 0.799 | 0.303 | 0.512 |
| ROTS       | 623  | 877  | 11758 | 2377 | 0.208 | 0.069 | 0.585 | 0.415 | 0.832 | 0.792 | 0.277 | 0.519 |
| scDD       | 453  | 1047 | 11588 | 2547 | 0.151 | 0.083 | 0.698 | 0.302 | 0.820 | 0.770 | 0.201 | 0.484 |
| T-test     | 912  | 588  | 12047 | 2088 | 0.304 | 0.047 | 0.392 | 0.608 | 0.852 | 0.829 | 0.405 | 0.567 |
| Wilcox     | 837  | 663  | 11972 | 2163 | 0.279 | 0.052 | 0.442 | 0.558 | 0.847 | 0.819 | 0.372 | 0.561 |
| DEG = 2000 |      |      |       |      |       |       |       |       |       |       |       |       |
| BPSC       | 1131 | 869  | 11766 | 1869 | 0.377 | 0.069 | 0.435 | 0.566 | 0.863 | 0.825 | 0.452 | 0.631 |
| DECENT     | 1400 | 600  | 12035 | 1600 | 0.467 | 0.047 | 0.300 | 0.700 | 0.883 | 0.859 | 0.560 | 0.784 |
| DEGseq     | 746  | 1254 | 11381 | 2254 | 0.249 | 0.099 | 0.627 | 0.373 | 0.835 | 0.776 | 0.298 | 0.523 |
| DESeqNB    | 1341 | 659  | 11976 | 1659 | 0.447 | 0.052 | 0.330 | 0.671 | 0.878 | 0.852 | 0.536 | 0.716 |
| DESeqLRT   | 948  | 1052 | 11583 | 2052 | 0.316 | 0.083 | 0.526 | 0.474 | 0.850 | 0.801 | 0.379 | 0.595 |
| DEsingle   | 1107 | 893  | 11742 | 1893 | 0.369 | 0.071 | 0.447 | 0.554 | 0.861 | 0.822 | 0.443 | 0.618 |
| EBSeq      | 928  | 1072 | 11563 | 2072 | 0.309 | 0.085 | 0.536 | 0.464 | 0.848 | 0.799 | 0.371 | 0.588 |
| edgeRLRT   | 1167 | 833  | 11802 | 1833 | 0.389 | 0.066 | 0.417 | 0.584 | 0.866 | 0.829 | 0.467 | 0.634 |
| edgeQLF    | 1189 | 811  | 11824 | 1811 | 0.396 | 0.064 | 0.406 | 0.595 | 0.867 | 0.832 | 0.476 | 0.679 |
| EMDomics   | 661  | 1339 | 11296 | 2339 | 0.220 | 0.106 | 0.670 | 0.331 | 0.828 | 0.765 | 0.264 | 0.557 |
| LIMMA      | 1321 | 679  | 11956 | 1679 | 0.440 | 0.054 | 0.340 | 0.661 | 0.877 | 0.849 | 0.528 | 0.633 |
| MAST       | 1028 | 972  | 11663 | 1972 | 0.343 | 0.077 | 0.486 | 0.514 | 0.855 | 0.812 | 0.411 | 0.606 |
| Monocle    | 1080 | 920  | 11715 | 1920 | 0.360 | 0.073 | 0.460 | 0.540 | 0.859 | 0.818 | 0.432 | 0.597 |
| NBSeq      | 1138 | 862  | 11773 | 1862 | 0.379 | 0.068 | 0.431 | 0.569 | 0.863 | 0.826 | 0.455 | 0.625 |
| NODES      | 836  | 1164 | 11471 | 2164 | 0.279 | 0.092 | 0.582 | 0.418 | 0.841 | 0.787 | 0.334 | 0.554 |
| ROTS       | 841  | 1159 | 11476 | 2159 | 0.280 | 0.092 | 0.580 | 0.421 | 0.842 | 0.788 | 0.336 | 0.551 |
| scDD       | 561  | 1439 | 11196 | 2439 | 0.187 | 0.114 | 0.720 | 0.281 | 0.821 | 0.752 | 0.224 | 0.508 |
| T-test     | 1144 | 856  | 11779 | 1856 | 0.381 | 0.068 | 0.428 | 0.572 | 0.864 | 0.827 | 0.458 | 0.623 |
| Wilcox     | 1073 | 927  | 11708 | 1927 | 0.358 | 0.073 | 0.464 | 0.537 | 0.859 | 0.817 | 0.429 | 0.607 |
| DEG = 2500 |      |      |       |      |       |       |       |       |       |       |       |       |
| BPSC       | 1338 | 1162 | 11473 | 1662 | 0.446 | 0.092 | 0.465 | 0.535 | 0.873 | 0.819 | 0.487 | 0.677 |
| DECENT     | 1553 | 947  | 11688 | 1447 | 0.518 | 0.075 | 0.379 | 0.621 | 0.890 | 0.847 | 0.565 | 0.823 |
| DEGseq     | 998  | 1502 | 11133 | 2002 | 0.333 | 0.119 | 0.601 | 0.399 | 0.848 | 0.776 | 0.363 | 0.549 |
| DESeqNB    | 1509 | 991  | 11644 | 1491 | 0.503 | 0.078 | 0.396 | 0.604 | 0.886 | 0.841 | 0.549 | 0.769 |

|            |      |      |       |      |       |       |       |       |       |       |       |       |
|------------|------|------|-------|------|-------|-------|-------|-------|-------|-------|-------|-------|
| DESeqLRT   | 1117 | 1383 | 11252 | 1883 | 0.372 | 0.109 | 0.553 | 0.447 | 0.857 | 0.791 | 0.406 | 0.631 |
| DEsingle   | 1281 | 1219 | 11416 | 1719 | 0.427 | 0.096 | 0.488 | 0.512 | 0.869 | 0.812 | 0.466 | 0.667 |
| EBSeq      | 1020 | 1480 | 11155 | 1980 | 0.340 | 0.117 | 0.592 | 0.408 | 0.849 | 0.779 | 0.371 | 0.626 |
| edgeRLRT   | 1364 | 1136 | 11499 | 1636 | 0.455 | 0.090 | 0.454 | 0.546 | 0.875 | 0.823 | 0.496 | 0.685 |
| edgeRQLF   | 1362 | 1138 | 11497 | 1638 | 0.454 | 0.090 | 0.455 | 0.545 | 0.875 | 0.822 | 0.495 | 0.721 |
| EMDomics   | 767  | 1733 | 10902 | 2233 | 0.256 | 0.137 | 0.693 | 0.307 | 0.830 | 0.746 | 0.279 | 0.576 |
| LIMMA      | 1492 | 1008 | 11627 | 1508 | 0.497 | 0.080 | 0.403 | 0.597 | 0.885 | 0.839 | 0.543 | 0.711 |
| MAST       | 1191 | 1309 | 11326 | 1809 | 0.397 | 0.104 | 0.524 | 0.476 | 0.862 | 0.801 | 0.433 | 0.648 |
| Monocle    | 1287 | 1213 | 11422 | 1713 | 0.429 | 0.096 | 0.485 | 0.515 | 0.870 | 0.813 | 0.468 | 0.645 |
| NBSeq      | 1328 | 1172 | 11463 | 1672 | 0.443 | 0.093 | 0.469 | 0.531 | 0.873 | 0.818 | 0.483 | 0.675 |
| NODES      | 1018 | 1482 | 11153 | 1982 | 0.339 | 0.117 | 0.593 | 0.407 | 0.849 | 0.778 | 0.370 | 0.586 |
| ROTS       | 999  | 1501 | 11134 | 2001 | 0.333 | 0.119 | 0.600 | 0.400 | 0.848 | 0.776 | 0.363 | 0.587 |
| scDD       | 640  | 1860 | 10775 | 2360 | 0.213 | 0.147 | 0.744 | 0.256 | 0.820 | 0.730 | 0.233 | 0.529 |
| T-test     | 1338 | 1162 | 11473 | 1662 | 0.446 | 0.092 | 0.465 | 0.535 | 0.873 | 0.819 | 0.487 | 0.674 |
| Wilcox     | 1258 | 1242 | 11393 | 1742 | 0.419 | 0.098 | 0.497 | 0.503 | 0.867 | 0.809 | 0.457 | 0.654 |
| DEG = 3000 |      |      |       |      |       |       |       |       |       |       |       |       |
| BPSC       | 1478 | 1522 | 11113 | 1522 | 0.493 | 0.120 | 0.507 | 0.493 | 0.880 | 0.805 | 0.493 | 0.722 |
| DECENT     | 1674 | 1326 | 11309 | 1326 | 0.558 | 0.105 | 0.442 | 0.558 | 0.895 | 0.830 | 0.558 | 0.857 |
| DEGseq     | 1228 | 1772 | 10863 | 1772 | 0.409 | 0.140 | 0.591 | 0.409 | 0.860 | 0.773 | 0.409 | 0.585 |
| DESeqNB    | 1653 | 1347 | 11288 | 1347 | 0.551 | 0.107 | 0.449 | 0.551 | 0.893 | 0.828 | 0.551 | 0.811 |
| DESeqLRT   | 1247 | 1753 | 10882 | 1753 | 0.416 | 0.139 | 0.584 | 0.416 | 0.861 | 0.776 | 0.416 | 0.666 |
| DEsingle   | 1428 | 1572 | 11063 | 1572 | 0.476 | 0.124 | 0.524 | 0.476 | 0.876 | 0.799 | 0.476 | 0.709 |
| EBSeq      | 1110 | 1890 | 10745 | 1890 | 0.370 | 0.150 | 0.630 | 0.370 | 0.850 | 0.758 | 0.370 | 0.654 |
| edgeRLRT   | 1537 | 1463 | 11172 | 1463 | 0.512 | 0.116 | 0.488 | 0.512 | 0.884 | 0.813 | 0.512 | 0.729 |
| edgeRQLF   | 1506 | 1494 | 11141 | 1494 | 0.502 | 0.118 | 0.498 | 0.502 | 0.882 | 0.809 | 0.502 | 0.758 |
| EMDomics   | 844  | 2156 | 10479 | 2156 | 0.281 | 0.171 | 0.719 | 0.281 | 0.829 | 0.724 | 0.281 | 0.594 |
| LIMMA      | 1612 | 1388 | 11247 | 1388 | 0.537 | 0.110 | 0.463 | 0.537 | 0.890 | 0.822 | 0.537 | 0.768 |
| MAST       | 1337 | 1663 | 10972 | 1663 | 0.446 | 0.132 | 0.554 | 0.446 | 0.868 | 0.787 | 0.446 | 0.685 |
| Monocle    | 1454 | 1546 | 11089 | 1546 | 0.485 | 0.122 | 0.515 | 0.485 | 0.878 | 0.802 | 0.485 | 0.691 |
| NBSeq      | 1497 | 1503 | 11132 | 1503 | 0.499 | 0.119 | 0.501 | 0.499 | 0.881 | 0.808 | 0.499 | 0.718 |
| NODES      | 1173 | 1827 | 10808 | 1827 | 0.391 | 0.145 | 0.609 | 0.391 | 0.855 | 0.766 | 0.391 | 0.620 |
| ROTS       | 1170 | 1830 | 10805 | 1830 | 0.390 | 0.145 | 0.610 | 0.390 | 0.855 | 0.766 | 0.390 | 0.618 |
| scDD       | 697  | 2303 | 10332 | 2303 | 0.232 | 0.182 | 0.768 | 0.232 | 0.818 | 0.705 | 0.232 | 0.547 |
| T-test     | 1501 | 1499 | 11136 | 1499 | 0.500 | 0.119 | 0.500 | 0.500 | 0.881 | 0.808 | 0.500 | 0.719 |
| Wilcox     | 1413 | 1587 | 11048 | 1587 | 0.471 | 0.126 | 0.529 | 0.471 | 0.874 | 0.797 | 0.471 | 0.695 |

TP: True Positives; FP: False Positives; TN: True Negatives; FN: False Negatives; TPR: True Positive Rate; FPR: False Positive Rate; FDR: False Discovery Rate; PPR: Positive Prediction Rate; NPV: Negative Prediction Value; ACC: Accuracy; F1: F1 score; AUROC: Area Under Receiver Operating Curve

**Table S9.** Evaluation of DE methods based on performance evaluation metrics for Islam scRNA-seq data.

|  | TP | FP | TN | FN | TPR | FPR | FDR | PPR | NPV | ACC | F1 | AUROC |
|--|----|----|----|----|-----|-----|-----|-----|-----|-----|----|-------|
|--|----|----|----|----|-----|-----|-----|-----|-----|-----|----|-------|

| Methods    |     | DEG = 500 |      |      |       |       |       |       |       |       |       |       |
|------------|-----|-----------|------|------|-------|-------|-------|-------|-------|-------|-------|-------|
| BPSC       | 300 | 200       | 8236 | 2700 | 0.100 | 0.024 | 0.400 | 0.600 | 0.753 | 0.746 | 0.171 | 0.450 |
| DECENT     | 370 | 130       | 8306 | 2630 | 0.123 | 0.015 | 0.260 | 0.740 | 0.760 | 0.759 | 0.211 | 0.466 |
| DEGSeq     | 190 | 310       | 8126 | 2810 | 0.063 | 0.037 | 0.620 | 0.380 | 0.743 | 0.727 | 0.109 | 0.431 |
| DESeqLRT   | 353 | 147       | 8289 | 2647 | 0.118 | 0.017 | 0.294 | 0.706 | 0.758 | 0.756 | 0.202 | 0.470 |
| DESeqNB    | 484 | 16        | 8420 | 2516 | 0.161 | 0.002 | 0.032 | 0.968 | 0.770 | 0.779 | 0.277 | 0.442 |
| DEsingle   | 346 | 154       | 8282 | 2654 | 0.115 | 0.018 | 0.308 | 0.692 | 0.757 | 0.754 | 0.198 | 0.469 |
| EBSeq      | 269 | 231       | 8205 | 2731 | 0.090 | 0.027 | 0.462 | 0.538 | 0.750 | 0.741 | 0.154 | 0.446 |
| edgeRLRT   | 378 | 113       | 8323 | 2613 | 0.129 | 0.013 | 0.226 | 0.774 | 0.761 | 0.762 | 0.221 | 0.456 |
| edgeRQLF   | 387 | 122       | 8314 | 2622 | 0.126 | 0.014 | 0.244 | 0.756 | 0.760 | 0.760 | 0.216 | 0.452 |
| EMDomics   | 313 | 187       | 8249 | 2687 | 0.104 | 0.022 | 0.374 | 0.626 | 0.754 | 0.749 | 0.179 | 0.456 |
| LIMMA      | 291 | 209       | 8227 | 2709 | 0.097 | 0.025 | 0.418 | 0.582 | 0.752 | 0.745 | 0.166 | 0.462 |
| MAST       | 285 | 215       | 8221 | 2715 | 0.095 | 0.025 | 0.430 | 0.570 | 0.752 | 0.744 | 0.163 | 0.456 |
| Monocle    | 278 | 222       | 8214 | 2722 | 0.093 | 0.026 | 0.444 | 0.556 | 0.751 | 0.743 | 0.159 | 0.446 |
| NBSeq      | 317 | 183       | 8253 | 2683 | 0.106 | 0.022 | 0.366 | 0.634 | 0.755 | 0.749 | 0.181 | 0.464 |
| NODES      | 181 | 319       | 8117 | 2819 | 0.060 | 0.038 | 0.638 | 0.362 | 0.742 | 0.726 | 0.103 | 0.436 |
| ROTS       | 282 | 218       | 8218 | 2718 | 0.094 | 0.026 | 0.436 | 0.564 | 0.751 | 0.743 | 0.161 | 0.445 |
| scDD       | 205 | 295       | 8141 | 2795 | 0.068 | 0.035 | 0.590 | 0.410 | 0.744 | 0.730 | 0.117 | 0.439 |
| T-test     | 310 | 190       | 8246 | 2690 | 0.103 | 0.023 | 0.380 | 0.620 | 0.754 | 0.748 | 0.177 | 0.459 |
| Wilcox     | 398 | 102       | 8334 | 2602 | 0.133 | 0.012 | 0.204 | 0.796 | 0.762 | 0.764 | 0.227 | 0.479 |
| DEG = 1000 |     |           |      |      |       |       |       |       |       |       |       |       |
| BPSC       | 470 | 530       | 7906 | 2530 | 0.157 | 0.063 | 0.530 | 0.470 | 0.758 | 0.732 | 0.235 | 0.509 |
| DECENT     | 691 | 309       | 8127 | 2309 | 0.230 | 0.037 | 0.309 | 0.691 | 0.779 | 0.771 | 0.346 | 0.533 |
| DEGSeq     | 374 | 626       | 7810 | 2626 | 0.125 | 0.074 | 0.626 | 0.374 | 0.748 | 0.716 | 0.187 | 0.463 |
| DESeqLRT   | 652 | 348       | 8088 | 2348 | 0.217 | 0.041 | 0.348 | 0.652 | 0.775 | 0.764 | 0.326 | 0.528 |
| DESeqNB    | 961 | 39        | 8397 | 2039 | 0.320 | 0.005 | 0.039 | 0.961 | 0.805 | 0.818 | 0.481 | 0.569 |
| DEsingle   | 576 | 424       | 8012 | 2424 | 0.192 | 0.050 | 0.424 | 0.576 | 0.768 | 0.751 | 0.288 | 0.525 |
| EBSeq      | 533 | 467       | 7969 | 2467 | 0.178 | 0.055 | 0.467 | 0.533 | 0.764 | 0.743 | 0.267 | 0.489 |
| edgeRLRT   | 758 | 242       | 8194 | 2242 | 0.253 | 0.029 | 0.242 | 0.758 | 0.785 | 0.783 | 0.379 | 0.534 |
| edgeRQLF   | 808 | 192       | 8244 | 2192 | 0.269 | 0.023 | 0.192 | 0.808 | 0.790 | 0.792 | 0.404 | 0.505 |
| EMDomics   | 639 | 361       | 8075 | 2361 | 0.213 | 0.043 | 0.361 | 0.639 | 0.774 | 0.762 | 0.320 | 0.504 |
| LIMMA      | 407 | 593       | 7843 | 2593 | 0.136 | 0.070 | 0.593 | 0.407 | 0.752 | 0.721 | 0.204 | 0.499 |
| MAST       | 486 | 514       | 7922 | 2514 | 0.162 | 0.061 | 0.514 | 0.486 | 0.759 | 0.735 | 0.243 | 0.499 |
| Monocle    | 495 | 505       | 7931 | 2505 | 0.165 | 0.060 | 0.505 | 0.495 | 0.760 | 0.737 | 0.248 | 0.492 |
| NBSeq      | 554 | 446       | 7990 | 2446 | 0.185 | 0.053 | 0.446 | 0.554 | 0.766 | 0.747 | 0.277 | 0.513 |
| NODES      | 322 | 678       | 7758 | 2678 | 0.107 | 0.080 | 0.678 | 0.322 | 0.743 | 0.707 | 0.161 | 0.463 |
| ROTS       | 533 | 467       | 7969 | 2467 | 0.178 | 0.055 | 0.467 | 0.533 | 0.764 | 0.743 | 0.267 | 0.496 |
| scDD       | 368 | 632       | 7804 | 2632 | 0.123 | 0.075 | 0.632 | 0.368 | 0.748 | 0.715 | 0.184 | 0.469 |
| T-test     | 585 | 415       | 8021 | 2415 | 0.195 | 0.049 | 0.415 | 0.585 | 0.769 | 0.753 | 0.293 | 0.509 |
| Wilcox     | 644 | 356       | 8080 | 2356 | 0.215 | 0.042 | 0.356 | 0.644 | 0.774 | 0.763 | 0.322 | 0.548 |
| DEG = 1500 |     |           |      |      |       |       |       |       |       |       |       |       |
| BPSC       | 660 | 840       | 7596 | 2340 | 0.220 | 0.100 | 0.560 | 0.440 | 0.764 | 0.722 | 0.293 | 0.536 |

|            |      |      |      |      |       |       |       |       |       |       |       |       |
|------------|------|------|------|------|-------|-------|-------|-------|-------|-------|-------|-------|
| DECENT     | 998  | 502  | 7934 | 2002 | 0.333 | 0.060 | 0.335 | 0.665 | 0.799 | 0.781 | 0.444 | 0.590 |
| DEGSeq     | 546  | 954  | 7482 | 2454 | 0.182 | 0.113 | 0.636 | 0.364 | 0.753 | 0.702 | 0.243 | 0.493 |
| DESeqLRT   | 888  | 612  | 7824 | 2112 | 0.296 | 0.073 | 0.408 | 0.592 | 0.787 | 0.762 | 0.395 | 0.584 |
| DESeqNB    | 1322 | 178  | 8258 | 1678 | 0.441 | 0.021 | 0.119 | 0.881 | 0.831 | 0.838 | 0.588 | 0.743 |
| DEsingle   | 771  | 729  | 7707 | 2229 | 0.257 | 0.086 | 0.486 | 0.514 | 0.776 | 0.741 | 0.343 | 0.566 |
| EBSeq      | 802  | 698  | 7738 | 2198 | 0.267 | 0.083 | 0.465 | 0.535 | 0.779 | 0.747 | 0.356 | 0.533 |
| edgeRLRT   | 1088 | 412  | 8024 | 1912 | 0.363 | 0.049 | 0.275 | 0.725 | 0.808 | 0.797 | 0.484 | 0.604 |
| edgeRQLF   | 1153 | 347  | 8089 | 1847 | 0.384 | 0.041 | 0.231 | 0.769 | 0.814 | 0.808 | 0.512 | 0.604 |
| EMDomics   | 942  | 558  | 7878 | 2058 | 0.314 | 0.066 | 0.372 | 0.628 | 0.793 | 0.771 | 0.419 | 0.561 |
| LIMMA      | 469  | 1031 | 7405 | 2531 | 0.156 | 0.122 | 0.687 | 0.313 | 0.745 | 0.689 | 0.208 | 0.519 |
| MAST       | 669  | 831  | 7605 | 2331 | 0.223 | 0.099 | 0.554 | 0.446 | 0.765 | 0.724 | 0.297 | 0.534 |
| Monocle    | 742  | 758  | 7678 | 2258 | 0.247 | 0.090 | 0.505 | 0.495 | 0.773 | 0.736 | 0.330 | 0.531 |
| NBSeq      | 756  | 744  | 7692 | 2244 | 0.252 | 0.088 | 0.496 | 0.504 | 0.774 | 0.739 | 0.336 | 0.554 |
| NODES      | 427  | 1073 | 7363 | 2573 | 0.142 | 0.127 | 0.715 | 0.285 | 0.741 | 0.681 | 0.190 | 0.486 |
| ROTS       | 729  | 771  | 7665 | 2271 | 0.243 | 0.091 | 0.514 | 0.486 | 0.771 | 0.734 | 0.324 | 0.540 |
| scDD       | 515  | 985  | 7451 | 2485 | 0.172 | 0.117 | 0.657 | 0.343 | 0.750 | 0.697 | 0.229 | 0.498 |
| T-test     | 844  | 656  | 7780 | 2156 | 0.281 | 0.078 | 0.437 | 0.563 | 0.783 | 0.754 | 0.375 | 0.555 |
| Wilcox     | 861  | 639  | 7797 | 2139 | 0.287 | 0.076 | 0.426 | 0.574 | 0.785 | 0.757 | 0.383 | 0.594 |
| DEG = 2000 |      |      |      |      |       |       |       |       |       |       |       |       |
| BPSC       | 812  | 1188 | 7248 | 2188 | 0.271 | 0.141 | 0.594 | 0.406 | 0.768 | 0.705 | 0.325 | 0.568 |
| DECENT     | 1255 | 745  | 7691 | 1745 | 0.418 | 0.088 | 0.373 | 0.628 | 0.815 | 0.782 | 0.502 | 0.650 |
| DEGSeq     | 730  | 1270 | 7166 | 2270 | 0.243 | 0.151 | 0.635 | 0.365 | 0.759 | 0.690 | 0.292 | 0.522 |
| DESeqLRT   | 1108 | 892  | 7544 | 1892 | 0.369 | 0.106 | 0.446 | 0.554 | 0.799 | 0.757 | 0.443 | 0.631 |
| DESeqNB    | 1591 | 409  | 8027 | 1409 | 0.530 | 0.048 | 0.205 | 0.796 | 0.851 | 0.841 | 0.636 | 0.827 |
| DEsingle   | 933  | 1067 | 7369 | 2067 | 0.311 | 0.126 | 0.534 | 0.467 | 0.781 | 0.726 | 0.373 | 0.604 |
| EBSeq      | 1074 | 926  | 7510 | 1926 | 0.358 | 0.110 | 0.463 | 0.537 | 0.796 | 0.751 | 0.430 | 0.578 |
| edgeRLRT   | 1399 | 601  | 7835 | 1601 | 0.466 | 0.071 | 0.301 | 0.700 | 0.830 | 0.807 | 0.560 | 0.670 |
| edgeRQLF   | 1552 | 448  | 7988 | 1448 | 0.517 | 0.053 | 0.224 | 0.776 | 0.847 | 0.834 | 0.621 | 0.660 |
| EMDomics   | 1264 | 736  | 7701 | 1736 | 0.421 | 0.087 | 0.368 | 0.632 | 0.816 | 0.784 | 0.506 | 0.611 |
| LIMMA      | 549  | 1451 | 6985 | 2451 | 0.183 | 0.172 | 0.726 | 0.275 | 0.740 | 0.659 | 0.220 | 0.534 |
| MAST       | 842  | 1158 | 7278 | 2158 | 0.281 | 0.137 | 0.579 | 0.421 | 0.771 | 0.710 | 0.337 | 0.567 |
| Monocle    | 949  | 1051 | 7385 | 2051 | 0.316 | 0.125 | 0.526 | 0.475 | 0.783 | 0.729 | 0.380 | 0.574 |
| NBSeq      | 924  | 1076 | 7360 | 2076 | 0.308 | 0.128 | 0.538 | 0.462 | 0.780 | 0.724 | 0.370 | 0.594 |
| NODES      | 512  | 1488 | 6948 | 2488 | 0.171 | 0.176 | 0.744 | 0.256 | 0.736 | 0.652 | 0.205 | 0.506 |
| ROTS       | 928  | 1072 | 7364 | 2072 | 0.309 | 0.127 | 0.536 | 0.464 | 0.780 | 0.725 | 0.371 | 0.578 |
| scDD       | 639  | 1361 | 7075 | 2361 | 0.213 | 0.161 | 0.681 | 0.320 | 0.750 | 0.675 | 0.256 | 0.524 |
| T-test     | 1107 | 893  | 7543 | 1893 | 0.369 | 0.106 | 0.447 | 0.554 | 0.799 | 0.756 | 0.443 | 0.601 |
| Wilcox     | 1060 | 940  | 7496 | 1940 | 0.353 | 0.111 | 0.470 | 0.530 | 0.794 | 0.748 | 0.424 | 0.635 |
| DEG = 2500 |      |      |      |      |       |       |       |       |       |       |       |       |
| BPSC       | 972  | 1528 | 6908 | 2028 | 0.324 | 0.181 | 0.611 | 0.389 | 0.773 | 0.689 | 0.353 | 0.596 |
| DECENT     | 1500 | 1000 | 7436 | 1500 | 0.500 | 0.119 | 0.400 | 0.600 | 0.832 | 0.781 | 0.545 | 0.704 |
| DEGSeq     | 924  | 1576 | 6860 | 2076 | 0.308 | 0.187 | 0.630 | 0.370 | 0.768 | 0.681 | 0.336 | 0.552 |
| DESeqLRT   | 1320 | 1180 | 7256 | 1680 | 0.440 | 0.140 | 0.472 | 0.528 | 0.812 | 0.750 | 0.480 | 0.673 |

|            |      |      |      |      |       |       |       |       |       |       |       |       |
|------------|------|------|------|------|-------|-------|-------|-------|-------|-------|-------|-------|
| DESeqNB    | 1830 | 670  | 7766 | 1170 | 0.610 | 0.079 | 0.268 | 0.732 | 0.869 | 0.839 | 0.665 | 0.881 |
| DEsingle   | 1077 | 1423 | 7013 | 1923 | 0.359 | 0.169 | 0.569 | 0.431 | 0.785 | 0.707 | 0.392 | 0.636 |
| EBSeq      | 1369 | 1131 | 7305 | 1631 | 0.456 | 0.134 | 0.452 | 0.548 | 0.817 | 0.758 | 0.498 | 0.620 |
| edgeRLRT   | 1704 | 796  | 7640 | 1296 | 0.568 | 0.094 | 0.318 | 0.682 | 0.855 | 0.817 | 0.620 | 0.732 |
| edgeRQLF   | 1917 | 583  | 7853 | 1083 | 0.639 | 0.069 | 0.233 | 0.767 | 0.879 | 0.854 | 0.697 | 0.733 |
| EMDomics   | 1548 | 952  | 7486 | 1452 | 0.516 | 0.113 | 0.381 | 0.619 | 0.838 | 0.790 | 0.563 | 0.672 |
| LIMMA      | 633  | 1867 | 6569 | 2367 | 0.211 | 0.221 | 0.747 | 0.253 | 0.735 | 0.630 | 0.230 | 0.548 |
| MAST       | 1000 | 1500 | 6936 | 2000 | 0.333 | 0.178 | 0.600 | 0.400 | 0.776 | 0.694 | 0.364 | 0.599 |
| Monocle    | 1148 | 1352 | 7084 | 1852 | 0.383 | 0.160 | 0.541 | 0.459 | 0.793 | 0.720 | 0.417 | 0.613 |
| NBSeq      | 1100 | 1400 | 7036 | 1900 | 0.367 | 0.166 | 0.560 | 0.440 | 0.787 | 0.711 | 0.400 | 0.627 |
| NODES      | 596  | 1904 | 6532 | 2404 | 0.199 | 0.226 | 0.762 | 0.238 | 0.731 | 0.623 | 0.217 | 0.523 |
| ROTS       | 1097 | 1403 | 7033 | 1903 | 0.366 | 0.166 | 0.561 | 0.439 | 0.787 | 0.711 | 0.399 | 0.616 |
| scDD       | 744  | 1756 | 6680 | 2256 | 0.248 | 0.208 | 0.702 | 0.298 | 0.748 | 0.649 | 0.271 | 0.548 |
| T-test     | 1348 | 1152 | 7284 | 1652 | 0.449 | 0.137 | 0.461 | 0.539 | 0.815 | 0.755 | 0.490 | 0.647 |
| Wilcox     | 1231 | 1269 | 7167 | 1769 | 0.410 | 0.150 | 0.508 | 0.492 | 0.802 | 0.734 | 0.448 | 0.673 |
| DEG = 3000 |      |      |      |      |       |       |       |       |       |       |       |       |
| BPSC       | 1154 | 1846 | 6590 | 1846 | 0.385 | 0.219 | 0.615 | 0.385 | 0.781 | 0.677 | 0.385 | 0.624 |
| DECENT     | 1737 | 1267 | 7169 | 1267 | 0.580 | 0.150 | 0.417 | 0.578 | 0.850 | 0.778 | 0.578 | 0.774 |
| DEGSeq     | 1098 | 1902 | 6534 | 1902 | 0.366 | 0.225 | 0.634 | 0.366 | 0.775 | 0.667 | 0.366 | 0.584 |
| DESeqLRT   | 1501 | 1499 | 6937 | 1499 | 0.500 | 0.178 | 0.500 | 0.500 | 0.822 | 0.738 | 0.500 | 0.716 |
| DESeqNB    | 2030 | 970  | 7466 | 970  | 0.677 | 0.115 | 0.323 | 0.677 | 0.885 | 0.830 | 0.677 | 0.932 |
| DEsingle   | 1230 | 1770 | 6666 | 1770 | 0.410 | 0.210 | 0.590 | 0.410 | 0.790 | 0.690 | 0.410 | 0.665 |
| EBSeq      | 1652 | 1348 | 7088 | 1348 | 0.551 | 0.160 | 0.449 | 0.551 | 0.840 | 0.764 | 0.551 | 0.666 |
| edgeRLRT   | 1960 | 1040 | 7396 | 1040 | 0.653 | 0.123 | 0.347 | 0.653 | 0.877 | 0.818 | 0.653 | 0.797 |
| edgeRQLF   | 2241 | 759  | 7677 | 759  | 0.747 | 0.090 | 0.253 | 0.747 | 0.910 | 0.867 | 0.747 | 0.817 |
| EMDomics   | 1735 | 1264 | 7174 | 1264 | 0.577 | 0.150 | 0.421 | 0.579 | 0.850 | 0.779 | 0.579 | 0.739 |
| LIMMA      | 749  | 2251 | 6185 | 2251 | 0.250 | 0.267 | 0.750 | 0.250 | 0.733 | 0.606 | 0.250 | 0.562 |
| MAST       | 1162 | 1838 | 6598 | 1838 | 0.387 | 0.218 | 0.613 | 0.387 | 0.782 | 0.679 | 0.387 | 0.629 |
| Monocle    | 1344 | 1656 | 6780 | 1656 | 0.448 | 0.196 | 0.552 | 0.448 | 0.804 | 0.710 | 0.448 | 0.650 |
| NBSeq      | 1269 | 1731 | 6705 | 1731 | 0.423 | 0.205 | 0.577 | 0.423 | 0.795 | 0.697 | 0.423 | 0.659 |
| NODES      | 684  | 2316 | 6120 | 2316 | 0.228 | 0.275 | 0.772 | 0.228 | 0.725 | 0.595 | 0.228 | 0.539 |
| ROTS       | 1289 | 1711 | 6725 | 1711 | 0.430 | 0.203 | 0.570 | 0.430 | 0.797 | 0.701 | 0.430 | 0.649 |
| scDD       | 846  | 2154 | 6282 | 2154 | 0.282 | 0.255 | 0.718 | 0.282 | 0.745 | 0.623 | 0.282 | 0.570 |
| T-test     | 1584 | 1416 | 7020 | 1416 | 0.528 | 0.168 | 0.472 | 0.528 | 0.832 | 0.752 | 0.528 | 0.692 |
| Wilcox     | 1391 | 1609 | 6827 | 1609 | 0.464 | 0.191 | 0.536 | 0.464 | 0.809 | 0.719 | 0.464 | 0.708 |

TP: True Positives; FP: False Positives; TN: True Negatives; FN: False Negatives; TPR: True Positive Rate; FPR: False Positive Rate; FDR: False Discovery Rate; PPR: Positive Prediction Rate; NPV: Negative Prediction Value; ACC: Accuracy; F1: F1 score; AUROC: Area Under Receiver Operating Curve

**Table S10.** Evaluation of DE methods based on performance evaluation metrics for Tung scRNA-seq data.



|            | TP  | FP  | TN    | FN   | TPR   | FPR   | FDR   | PPR   | NPV   | ACC   | F1    | AUROC |
|------------|-----|-----|-------|------|-------|-------|-------|-------|-------|-------|-------|-------|
| DEG = 500  |     |     |       |      |       |       |       |       |       |       |       |       |
| BPSC       | 190 | 310 | 12645 | 2810 | 0.063 | 0.024 | 0.620 | 0.380 | 0.818 | 0.804 | 0.109 | 0.440 |
| DECENT     | 170 | 330 | 12625 | 2830 | 0.057 | 0.025 | 0.660 | 0.340 | 0.817 | 0.802 | 0.097 | 0.432 |
| DEGSeq     | 81  | 419 | 12536 | 2919 | 0.027 | 0.032 | 0.838 | 0.162 | 0.811 | 0.791 | 0.046 | 0.414 |
| DESeqLRT   | 204 | 296 | 12659 | 2796 | 0.068 | 0.023 | 0.592 | 0.408 | 0.819 | 0.806 | 0.117 | 0.446 |
| DESeqNB    | 296 | 204 | 12751 | 2704 | 0.099 | 0.016 | 0.408 | 0.592 | 0.825 | 0.818 | 0.169 | 0.468 |
| DEsingle   | 242 | 258 | 12697 | 2758 | 0.081 | 0.020 | 0.516 | 0.484 | 0.822 | 0.811 | 0.138 | 0.457 |
| EBSeq      | 264 | 236 | 12719 | 2736 | 0.088 | 0.018 | 0.472 | 0.528 | 0.823 | 0.814 | 0.151 | 0.448 |
| EdgeR      | 237 | 263 | 12692 | 2763 | 0.079 | 0.020 | 0.526 | 0.474 | 0.821 | 0.810 | 0.135 | 0.450 |
| EdgeRQLF   | 330 | 170 | 12785 | 2670 | 0.110 | 0.013 | 0.340 | 0.660 | 0.827 | 0.822 | 0.189 | 0.461 |
| LIMMA      | 244 | 256 | 12699 | 2756 | 0.081 | 0.020 | 0.512 | 0.488 | 0.822 | 0.811 | 0.139 | 0.455 |
| MAST       | 297 | 203 | 12752 | 2703 | 0.099 | 0.016 | 0.406 | 0.594 | 0.825 | 0.818 | 0.170 | 0.469 |
| Monocle    | 92  | 408 | 12547 | 2908 | 0.031 | 0.031 | 0.816 | 0.184 | 0.812 | 0.792 | 0.053 | 0.415 |
| NBSeq      | 114 | 386 | 12569 | 2886 | 0.038 | 0.030 | 0.772 | 0.228 | 0.813 | 0.795 | 0.065 | 0.427 |
| NODES      | 183 | 317 | 12638 | 2817 | 0.061 | 0.024 | 0.634 | 0.366 | 0.818 | 0.804 | 0.105 | 0.442 |
| ROTS       | 111 | 389 | 12566 | 2889 | 0.037 | 0.030 | 0.778 | 0.222 | 0.813 | 0.795 | 0.063 | 0.418 |
| scDD       | 96  | 404 | 12551 | 2904 | 0.032 | 0.031 | 0.808 | 0.192 | 0.812 | 0.793 | 0.055 | 0.421 |
| T.test     | 149 | 351 | 12604 | 2851 | 0.050 | 0.027 | 0.702 | 0.298 | 0.816 | 0.799 | 0.085 | 0.429 |
| Wilcox     | 253 | 247 | 12708 | 2747 | 0.084 | 0.019 | 0.494 | 0.506 | 0.822 | 0.812 | 0.145 | 0.455 |
| EMDomics   | 287 | 213 | 12742 | 2713 | 0.096 | 0.016 | 0.426 | 0.574 | 0.824 | 0.817 | 0.164 | 0.460 |
| DEG = 1000 |     |     |       |      |       |       |       |       |       |       |       |       |
| BPSC       | 298 | 702 | 12253 | 2702 | 0.099 | 0.054 | 0.702 | 0.298 | 0.819 | 0.787 | 0.149 | 0.458 |
| DECENT     | 365 | 635 | 12320 | 2635 | 0.122 | 0.049 | 0.635 | 0.365 | 0.824 | 0.795 | 0.183 | 0.458 |
| DEGSeq     | 188 | 812 | 12143 | 2812 | 0.063 | 0.063 | 0.812 | 0.188 | 0.812 | 0.773 | 0.094 | 0.428 |
| DESeqLRT   | 317 | 683 | 12272 | 2683 | 0.106 | 0.053 | 0.683 | 0.317 | 0.821 | 0.789 | 0.159 | 0.470 |
| DESeqNB    | 394 | 606 | 12349 | 2606 | 0.131 | 0.047 | 0.606 | 0.394 | 0.826 | 0.799 | 0.197 | 0.502 |
| DEsingle   | 403 | 597 | 12358 | 2597 | 0.134 | 0.046 | 0.597 | 0.403 | 0.826 | 0.800 | 0.202 | 0.487 |
| EBSeq      | 528 | 472 | 12483 | 2472 | 0.176 | 0.036 | 0.472 | 0.528 | 0.835 | 0.815 | 0.264 | 0.490 |
| EdgeR      | 428 | 572 | 12383 | 2572 | 0.143 | 0.044 | 0.572 | 0.428 | 0.828 | 0.803 | 0.214 | 0.484 |
| EdgeRQLF   | 627 | 373 | 12582 | 2373 | 0.209 | 0.029 | 0.373 | 0.627 | 0.841 | 0.828 | 0.314 | 0.514 |
| LIMMA      | 392 | 608 | 12347 | 2608 | 0.131 | 0.047 | 0.608 | 0.392 | 0.826 | 0.798 | 0.196 | 0.484 |
| MAST       | 457 | 543 | 12412 | 2543 | 0.152 | 0.042 | 0.543 | 0.457 | 0.830 | 0.807 | 0.229 | 0.507 |
| Monocle    | 212 | 788 | 12167 | 2788 | 0.071 | 0.061 | 0.788 | 0.212 | 0.814 | 0.776 | 0.106 | 0.433 |
| NBSeq      | 215 | 785 | 12170 | 2785 | 0.072 | 0.061 | 0.785 | 0.215 | 0.814 | 0.776 | 0.108 | 0.441 |
| NODES      | 271 | 729 | 12226 | 2729 | 0.090 | 0.056 | 0.729 | 0.271 | 0.818 | 0.783 | 0.136 | 0.460 |
| ROTS       | 209 | 791 | 12164 | 2791 | 0.070 | 0.061 | 0.791 | 0.209 | 0.813 | 0.775 | 0.105 | 0.437 |
| scDD       | 148 | 852 | 12103 | 2852 | 0.049 | 0.066 | 0.852 | 0.148 | 0.809 | 0.768 | 0.074 | 0.431 |
| T.test     | 239 | 761 | 12194 | 2761 | 0.080 | 0.059 | 0.761 | 0.239 | 0.815 | 0.779 | 0.120 | 0.448 |
| Wilcox     | 414 | 586 | 12369 | 2586 | 0.138 | 0.045 | 0.586 | 0.414 | 0.827 | 0.801 | 0.207 | 0.489 |
| EMDomics   | 372 | 628 | 12327 | 2628 | 0.124 | 0.048 | 0.628 | 0.372 | 0.824 | 0.796 | 0.186 | 0.494 |
| DEG = 1500 |     |     |       |      |       |       |       |       |       |       |       |       |

|            |      |      |       |      |       |       |       |       |       |       |       |       |
|------------|------|------|-------|------|-------|-------|-------|-------|-------|-------|-------|-------|
| BPSC       | 398  | 1102 | 11853 | 2602 | 0.133 | 0.085 | 0.735 | 0.265 | 0.820 | 0.768 | 0.177 | 0.490 |
| DECENT     | 535  | 965  | 11990 | 2465 | 0.178 | 0.074 | 0.643 | 0.357 | 0.829 | 0.785 | 0.238 | 0.490 |
| DEGSeq     | 283  | 1217 | 11738 | 2717 | 0.094 | 0.094 | 0.811 | 0.189 | 0.812 | 0.753 | 0.126 | 0.444 |
| DESeqLRT   | 428  | 1072 | 11883 | 2572 | 0.143 | 0.083 | 0.715 | 0.285 | 0.822 | 0.772 | 0.190 | 0.491 |
| DESeqNB    | 472  | 1028 | 11927 | 2528 | 0.157 | 0.079 | 0.685 | 0.315 | 0.825 | 0.777 | 0.210 | 0.519 |
| DEsingle   | 531  | 969  | 11986 | 2469 | 0.177 | 0.075 | 0.646 | 0.354 | 0.829 | 0.785 | 0.236 | 0.514 |
| EBSeq      | 800  | 700  | 12255 | 2200 | 0.267 | 0.054 | 0.467 | 0.533 | 0.848 | 0.818 | 0.356 | 0.535 |
| EdgeR      | 592  | 908  | 12047 | 2408 | 0.197 | 0.070 | 0.605 | 0.395 | 0.833 | 0.792 | 0.263 | 0.515 |
| EdgeRQLF   | 881  | 619  | 12336 | 2119 | 0.294 | 0.048 | 0.413 | 0.587 | 0.853 | 0.828 | 0.392 | 0.570 |
| LIMMA      | 487  | 1013 | 11942 | 2513 | 0.162 | 0.078 | 0.675 | 0.325 | 0.826 | 0.779 | 0.216 | 0.509 |
| MAST       | 557  | 943  | 12012 | 2443 | 0.186 | 0.073 | 0.629 | 0.371 | 0.831 | 0.788 | 0.248 | 0.533 |
| Monocle    | 316  | 1184 | 11771 | 2684 | 0.105 | 0.091 | 0.789 | 0.211 | 0.814 | 0.758 | 0.140 | 0.451 |
| NBSeq      | 342  | 1158 | 11797 | 2658 | 0.114 | 0.089 | 0.772 | 0.228 | 0.816 | 0.761 | 0.152 | 0.457 |
| NODES      | 364  | 1136 | 11819 | 2636 | 0.121 | 0.088 | 0.757 | 0.243 | 0.818 | 0.764 | 0.162 | 0.476 |
| ROTS       | 285  | 1215 | 11740 | 2715 | 0.095 | 0.094 | 0.810 | 0.190 | 0.812 | 0.754 | 0.127 | 0.453 |
| scDD       | 190  | 1310 | 11645 | 2810 | 0.063 | 0.101 | 0.873 | 0.127 | 0.806 | 0.742 | 0.084 | 0.440 |
| T.test     | 340  | 1160 | 11795 | 2660 | 0.113 | 0.090 | 0.773 | 0.227 | 0.816 | 0.761 | 0.151 | 0.465 |
| Wilcox     | 522  | 978  | 11977 | 2478 | 0.174 | 0.075 | 0.652 | 0.348 | 0.829 | 0.783 | 0.232 | 0.517 |
| EMDomics   | 493  | 1007 | 11948 | 2507 | 0.164 | 0.078 | 0.671 | 0.329 | 0.827 | 0.780 | 0.219 | 0.512 |
| DEG = 2000 |      |      |       |      |       |       |       |       |       |       |       |       |
| BPSC       | 498  | 1502 | 11453 | 2502 | 0.166 | 0.116 | 0.751 | 0.249 | 0.821 | 0.749 | 0.199 | 0.520 |
| DECENT     | 701  | 1299 | 11656 | 2299 | 0.234 | 0.100 | 0.650 | 0.351 | 0.835 | 0.774 | 0.280 | 0.520 |
| DEGSeq     | 373  | 1627 | 11328 | 2627 | 0.124 | 0.126 | 0.814 | 0.187 | 0.812 | 0.733 | 0.149 | 0.460 |
| DESeqLRT   | 505  | 1495 | 11460 | 2495 | 0.168 | 0.115 | 0.748 | 0.253 | 0.821 | 0.750 | 0.202 | 0.509 |
| DESeqNB    | 599  | 1401 | 11554 | 2401 | 0.200 | 0.108 | 0.701 | 0.300 | 0.828 | 0.762 | 0.240 | 0.535 |
| DEsingle   | 633  | 1367 | 11588 | 2367 | 0.211 | 0.106 | 0.684 | 0.317 | 0.830 | 0.766 | 0.253 | 0.537 |
| EBSeq      | 1021 | 979  | 11976 | 1979 | 0.340 | 0.076 | 0.490 | 0.511 | 0.858 | 0.815 | 0.408 | 0.584 |
| EdgeR      | 748  | 1252 | 11703 | 2252 | 0.249 | 0.097 | 0.626 | 0.374 | 0.839 | 0.780 | 0.299 | 0.545 |
| EdgeRQLF   | 1071 | 929  | 12026 | 1929 | 0.357 | 0.072 | 0.465 | 0.536 | 0.862 | 0.821 | 0.428 | 0.623 |
| LIMMA      | 579  | 1421 | 11534 | 2421 | 0.193 | 0.110 | 0.711 | 0.290 | 0.827 | 0.759 | 0.232 | 0.529 |
| MAST       | 651  | 1349 | 11606 | 2349 | 0.217 | 0.104 | 0.675 | 0.326 | 0.832 | 0.768 | 0.260 | 0.554 |
| Monocle    | 409  | 1591 | 11364 | 2591 | 0.136 | 0.123 | 0.796 | 0.205 | 0.814 | 0.738 | 0.164 | 0.469 |
| NBSeq      | 454  | 1546 | 11409 | 2546 | 0.151 | 0.119 | 0.773 | 0.227 | 0.818 | 0.744 | 0.182 | 0.475 |
| NODES      | 440  | 1560 | 11395 | 2560 | 0.147 | 0.120 | 0.780 | 0.220 | 0.817 | 0.742 | 0.176 | 0.492 |
| ROTS       | 367  | 1633 | 11322 | 2633 | 0.122 | 0.126 | 0.817 | 0.184 | 0.811 | 0.733 | 0.147 | 0.467 |
| scDD       | 222  | 1778 | 11177 | 2778 | 0.074 | 0.137 | 0.889 | 0.111 | 0.801 | 0.714 | 0.089 | 0.447 |
| T.test     | 438  | 1562 | 11393 | 2562 | 0.146 | 0.121 | 0.781 | 0.219 | 0.816 | 0.742 | 0.175 | 0.482 |
| Wilcox     | 627  | 1373 | 11582 | 2373 | 0.209 | 0.106 | 0.687 | 0.314 | 0.830 | 0.765 | 0.251 | 0.538 |
| EMDomics   | 598  | 1402 | 11553 | 2402 | 0.199 | 0.108 | 0.701 | 0.299 | 0.828 | 0.762 | 0.239 | 0.533 |
| DEG = 2500 |      |      |       |      |       |       |       |       |       |       |       |       |
| BPSC       | 587  | 1913 | 11042 | 2413 | 0.196 | 0.148 | 0.765 | 0.235 | 0.821 | 0.729 | 0.213 | 0.550 |
| DECENT     | 828  | 1672 | 11283 | 2172 | 0.276 | 0.129 | 0.669 | 0.331 | 0.839 | 0.759 | 0.301 | 0.550 |

|            |      |      |       |      |       |       |       |       |       |       |       |       |
|------------|------|------|-------|------|-------|-------|-------|-------|-------|-------|-------|-------|
| DEGSeq     | 453  | 2047 | 10908 | 2547 | 0.151 | 0.158 | 0.819 | 0.181 | 0.811 | 0.712 | 0.165 | 0.477 |
| DESeqLRT   | 563  | 1937 | 11018 | 2437 | 0.188 | 0.150 | 0.775 | 0.225 | 0.819 | 0.726 | 0.205 | 0.525 |
| DESeqNB    | 675  | 1825 | 11130 | 2325 | 0.225 | 0.141 | 0.730 | 0.270 | 0.827 | 0.740 | 0.245 | 0.552 |
| DEsingle   | 726  | 1774 | 11181 | 2274 | 0.242 | 0.137 | 0.710 | 0.290 | 0.831 | 0.746 | 0.264 | 0.558 |
| EBSeq      | 1262 | 1238 | 11717 | 1738 | 0.421 | 0.096 | 0.495 | 0.505 | 0.871 | 0.813 | 0.459 | 0.624 |
| EdgeR      | 894  | 1606 | 11349 | 2106 | 0.298 | 0.124 | 0.642 | 0.358 | 0.843 | 0.767 | 0.325 | 0.574 |
| EdgeRQLF   | 1235 | 1265 | 11690 | 1765 | 0.412 | 0.098 | 0.506 | 0.494 | 0.869 | 0.810 | 0.449 | 0.666 |
| LIMMA      | 653  | 1847 | 11108 | 2347 | 0.218 | 0.143 | 0.739 | 0.261 | 0.826 | 0.737 | 0.237 | 0.547 |
| MAST       | 740  | 1760 | 11195 | 2260 | 0.247 | 0.136 | 0.704 | 0.296 | 0.832 | 0.748 | 0.269 | 0.573 |
| Monocle    | 486  | 2014 | 10941 | 2514 | 0.162 | 0.155 | 0.806 | 0.194 | 0.813 | 0.716 | 0.177 | 0.486 |
| NBSeq      | 558  | 1942 | 11013 | 2442 | 0.186 | 0.150 | 0.777 | 0.223 | 0.819 | 0.725 | 0.203 | 0.494 |
| NODES      | 501  | 1999 | 10956 | 2499 | 0.167 | 0.154 | 0.800 | 0.200 | 0.814 | 0.718 | 0.182 | 0.506 |
| ROTS       | 440  | 2060 | 10895 | 2560 | 0.147 | 0.159 | 0.824 | 0.176 | 0.810 | 0.710 | 0.160 | 0.481 |
| scDD       | 271  | 2229 | 10726 | 2729 | 0.090 | 0.172 | 0.892 | 0.108 | 0.797 | 0.689 | 0.099 | 0.454 |
| T.test     | 532  | 1968 | 10987 | 2468 | 0.177 | 0.152 | 0.787 | 0.213 | 0.817 | 0.722 | 0.193 | 0.499 |
| Wilcox     | 727  | 1773 | 11182 | 2273 | 0.242 | 0.137 | 0.709 | 0.291 | 0.831 | 0.746 | 0.264 | 0.558 |
| EMDomics   | 710  | 1790 | 11165 | 2290 | 0.237 | 0.138 | 0.716 | 0.284 | 0.830 | 0.744 | 0.258 | 0.551 |
| DEG = 3000 |      |      |       |      |       |       |       |       |       |       |       |       |
| BPSC       | 673  | 2327 | 10628 | 2327 | 0.224 | 0.180 | 0.776 | 0.224 | 0.820 | 0.708 | 0.224 | 0.578 |
| DECENT     | 929  | 2071 | 10884 | 2071 | 0.310 | 0.160 | 0.690 | 0.310 | 0.840 | 0.740 | 0.310 | 0.578 |
| DEGSeq     | 517  | 2483 | 10472 | 2483 | 0.172 | 0.192 | 0.828 | 0.172 | 0.808 | 0.689 | 0.172 | 0.492 |
| DESeqLRT   | 645  | 2355 | 10600 | 2355 | 0.215 | 0.182 | 0.785 | 0.215 | 0.818 | 0.705 | 0.215 | 0.539 |
| DESeqNB    | 771  | 2229 | 10726 | 2229 | 0.257 | 0.172 | 0.743 | 0.257 | 0.828 | 0.721 | 0.257 | 0.569 |
| DEsingle   | 821  | 2179 | 10776 | 2179 | 0.274 | 0.168 | 0.726 | 0.274 | 0.832 | 0.727 | 0.274 | 0.576 |
| EBSeq      | 1508 | 1492 | 11463 | 1492 | 0.503 | 0.115 | 0.497 | 0.503 | 0.885 | 0.813 | 0.503 | 0.664 |
| EdgeR      | 1019 | 1981 | 10974 | 1981 | 0.340 | 0.153 | 0.660 | 0.340 | 0.847 | 0.752 | 0.340 | 0.601 |
| EdgeRQLF   | 1381 | 1619 | 11336 | 1619 | 0.460 | 0.125 | 0.540 | 0.460 | 0.875 | 0.797 | 0.460 | 0.703 |
| LIMMA      | 740  | 2260 | 10695 | 2260 | 0.247 | 0.174 | 0.753 | 0.247 | 0.826 | 0.717 | 0.247 | 0.563 |
| MAST       | 820  | 2180 | 10775 | 2180 | 0.273 | 0.168 | 0.727 | 0.273 | 0.832 | 0.727 | 0.273 | 0.590 |
| Monocle    | 566  | 2434 | 10521 | 2434 | 0.189 | 0.188 | 0.811 | 0.189 | 0.812 | 0.695 | 0.189 | 0.501 |
| NBSeq      | 664  | 2336 | 10619 | 2336 | 0.221 | 0.180 | 0.779 | 0.221 | 0.820 | 0.707 | 0.221 | 0.513 |
| NODES      | 562  | 2438 | 10517 | 2438 | 0.187 | 0.188 | 0.813 | 0.187 | 0.812 | 0.694 | 0.187 | 0.519 |
| ROTS       | 503  | 2497 | 10458 | 2497 | 0.168 | 0.193 | 0.832 | 0.168 | 0.807 | 0.687 | 0.168 | 0.494 |
| scDD       | 330  | 2670 | 10285 | 2670 | 0.110 | 0.206 | 0.890 | 0.110 | 0.794 | 0.665 | 0.110 | 0.462 |
| T.test     | 614  | 2386 | 10569 | 2386 | 0.205 | 0.184 | 0.795 | 0.205 | 0.816 | 0.701 | 0.205 | 0.515 |
| Wilcox     | 814  | 2186 | 10769 | 2186 | 0.271 | 0.169 | 0.729 | 0.271 | 0.831 | 0.726 | 0.271 | 0.576 |
| EMDomics   | 812  | 2188 | 10767 | 2188 | 0.271 | 0.169 | 0.729 | 0.271 | 0.831 | 0.726 | 0.271 | 0.569 |

TP: True Positives; FP: False Positives; TN: True Negatives; FN: False Negatives; TPR: True Positive Rate; FPR: False Positive Rate; FDR: False Discovery Rate; PPR: Positive Prediction Rate; NPV: Negative Prediction Value; ACC: Accuracy; F1: F1 score; AUROC: Area Under Receiver Operating Curve

**Table S11.** Evaluation of DE methods based on performance evaluation metrics for Ziegenhain scRNA-seq data.

|                | TP                 | FP  | TN    | FN   | TPR   | FPR   | FDR   | PPR   | NPV   | ACC   | F1    | AUROC |
|----------------|--------------------|-----|-------|------|-------|-------|-------|-------|-------|-------|-------|-------|
| <b>Methods</b> | <b>DEG = 500</b>   |     |       |      |       |       |       |       |       |       |       |       |
| BPSC           | 252                | 248 | 12331 | 2748 | 0.084 | 0.020 | 0.496 | 0.504 | 0.818 | 0.808 | 0.144 | 0.459 |
| DECENT         | 168                | 332 | 12247 | 2832 | 0.056 | 0.026 | 0.664 | 0.336 | 0.812 | 0.797 | 0.096 | 0.430 |
| DEGSeq         | 105                | 395 | 12184 | 2895 | 0.035 | 0.031 | 0.790 | 0.210 | 0.808 | 0.789 | 0.060 | 0.420 |
| DESeqLRT       | 181                | 319 | 12260 | 2819 | 0.060 | 0.025 | 0.638 | 0.362 | 0.813 | 0.799 | 0.103 | 0.430 |
| DESeqNB        | 214                | 286 | 12293 | 2786 | 0.071 | 0.023 | 0.572 | 0.428 | 0.815 | 0.803 | 0.122 | 0.439 |
| DEsingle       | 249                | 251 | 12328 | 2751 | 0.083 | 0.020 | 0.502 | 0.498 | 0.818 | 0.807 | 0.142 | 0.427 |
| EBSeq          | 135                | 365 | 12214 | 2865 | 0.045 | 0.029 | 0.730 | 0.270 | 0.810 | 0.793 | 0.077 | 0.424 |
| edgeRLRT       | 164                | 336 | 12243 | 2836 | 0.055 | 0.027 | 0.672 | 0.328 | 0.812 | 0.796 | 0.094 | 0.429 |
| edgeQLF        | 231                | 269 | 12310 | 2769 | 0.077 | 0.021 | 0.538 | 0.462 | 0.816 | 0.805 | 0.132 | 0.440 |
| EMDomics       | 155                | 345 | 12234 | 2845 | 0.052 | 0.027 | 0.690 | 0.310 | 0.811 | 0.795 | 0.089 | 0.423 |
| LIMMA          | 142                | 358 | 12221 | 2858 | 0.047 | 0.028 | 0.716 | 0.284 | 0.810 | 0.794 | 0.081 | 0.433 |
| MAST           | 117                | 383 | 12196 | 2883 | 0.039 | 0.030 | 0.766 | 0.234 | 0.809 | 0.790 | 0.067 | 0.419 |
| Monocle        | 228                | 272 | 12307 | 2772 | 0.076 | 0.022 | 0.544 | 0.456 | 0.816 | 0.805 | 0.130 | 0.441 |
| NBSeq          | 175                | 325 | 12254 | 2825 | 0.058 | 0.026 | 0.650 | 0.350 | 0.813 | 0.798 | 0.100 | 0.430 |
| NODES          | 211                | 289 | 12290 | 2789 | 0.070 | 0.023 | 0.578 | 0.422 | 0.815 | 0.802 | 0.121 | 0.433 |
| ROTS           | 96                 | 404 | 12175 | 2904 | 0.032 | 0.032 | 0.808 | 0.192 | 0.807 | 0.788 | 0.055 | 0.418 |
| scDD           | 168                | 332 | 12247 | 2832 | 0.056 | 0.026 | 0.664 | 0.336 | 0.812 | 0.797 | 0.096 | 0.425 |
| T-test         | 217                | 283 | 12296 | 2783 | 0.072 | 0.022 | 0.566 | 0.434 | 0.815 | 0.803 | 0.124 | 0.438 |
| Wilcox         | 284                | 216 | 12363 | 2716 | 0.095 | 0.017 | 0.432 | 0.568 | 0.820 | 0.812 | 0.162 | 0.441 |
|                | <b>NDEG = 1000</b> |     |       |      |       |       |       |       |       |       |       |       |
| BPSC           | 364                | 636 | 11943 | 2636 | 0.121 | 0.051 | 0.636 | 0.364 | 0.819 | 0.790 | 0.182 | 0.485 |
| DECENT         | 286                | 714 | 11865 | 2714 | 0.095 | 0.057 | 0.714 | 0.286 | 0.814 | 0.780 | 0.143 | 0.455 |
| DEGSeq         | 219                | 781 | 11798 | 2781 | 0.073 | 0.062 | 0.781 | 0.219 | 0.809 | 0.771 | 0.110 | 0.436 |
| DESeqLRT       | 373                | 627 | 11952 | 2627 | 0.124 | 0.050 | 0.627 | 0.373 | 0.820 | 0.791 | 0.187 | 0.461 |
| DESeqNB        | 465                | 535 | 12044 | 2535 | 0.155 | 0.043 | 0.535 | 0.465 | 0.826 | 0.803 | 0.233 | 0.473 |
| DEsingle       | 467                | 533 | 12046 | 2533 | 0.156 | 0.042 | 0.533 | 0.467 | 0.826 | 0.803 | 0.234 | 0.476 |
| EBSeq          | 254                | 746 | 11833 | 2746 | 0.085 | 0.059 | 0.746 | 0.254 | 0.812 | 0.776 | 0.127 | 0.445 |
| edgeRLRT       | 336                | 664 | 11915 | 2664 | 0.112 | 0.053 | 0.664 | 0.336 | 0.817 | 0.786 | 0.168 | 0.456 |
| edgeQLF        | 346                | 654 | 11925 | 2654 | 0.115 | 0.052 | 0.654 | 0.346 | 0.818 | 0.788 | 0.173 | 0.473 |
| EMDomics       | 336                | 664 | 11915 | 2664 | 0.112 | 0.053 | 0.664 | 0.336 | 0.817 | 0.786 | 0.168 | 0.449 |
| LIMMA          | 229                | 771 | 11808 | 2771 | 0.076 | 0.061 | 0.771 | 0.229 | 0.810 | 0.773 | 0.115 | 0.449 |
| MAST           | 231                | 769 | 11810 | 2769 | 0.077 | 0.061 | 0.769 | 0.231 | 0.810 | 0.773 | 0.116 | 0.438 |
| Monocle        | 368                | 632 | 11947 | 2632 | 0.123 | 0.050 | 0.632 | 0.368 | 0.819 | 0.790 | 0.184 | 0.475 |
| NBSeq          | 393                | 607 | 11972 | 2607 | 0.131 | 0.048 | 0.607 | 0.393 | 0.821 | 0.794 | 0.197 | 0.460 |
| NODES          | 391                | 609 | 11970 | 2609 | 0.130 | 0.048 | 0.609 | 0.391 | 0.821 | 0.793 | 0.196 | 0.470 |
| ROTS           | 189                | 811 | 11768 | 2811 | 0.063 | 0.064 | 0.811 | 0.189 | 0.807 | 0.768 | 0.095 | 0.432 |
| scDD           | 268                | 732 | 11847 | 2732 | 0.089 | 0.058 | 0.732 | 0.268 | 0.813 | 0.778 | 0.134 | 0.452 |
| T-test         | 430                | 570 | 12009 | 2570 | 0.143 | 0.045 | 0.570 | 0.430 | 0.824 | 0.798 | 0.215 | 0.474 |
| Wilcox         | 543                | 457 | 12122 | 2457 | 0.181 | 0.036 | 0.457 | 0.543 | 0.831 | 0.813 | 0.272 | 0.492 |
|                | <b>NDEG = 1500</b> |     |       |      |       |       |       |       |       |       |       |       |

|             |      |      |       |      |       |       |       |       |       |       |       |       |
|-------------|------|------|-------|------|-------|-------|-------|-------|-------|-------|-------|-------|
| BPSC        | 466  | 1034 | 11545 | 2534 | 0.155 | 0.082 | 0.689 | 0.311 | 0.820 | 0.771 | 0.207 | 0.505 |
| DECENT      | 431  | 1069 | 11510 | 2569 | 0.144 | 0.085 | 0.713 | 0.287 | 0.818 | 0.766 | 0.192 | 0.476 |
| DEGSeq      | 361  | 1139 | 11440 | 2639 | 0.120 | 0.091 | 0.759 | 0.241 | 0.813 | 0.757 | 0.160 | 0.455 |
| DESeqLRT    | 552  | 948  | 11631 | 2448 | 0.184 | 0.075 | 0.632 | 0.368 | 0.826 | 0.782 | 0.245 | 0.491 |
| DESeqNB     | 702  | 798  | 11781 | 2298 | 0.234 | 0.063 | 0.532 | 0.468 | 0.837 | 0.801 | 0.312 | 0.514 |
| DEsingle    | 687  | 813  | 11766 | 2313 | 0.229 | 0.065 | 0.542 | 0.458 | 0.836 | 0.799 | 0.305 | 0.517 |
| EBSeq       | 412  | 1088 | 11491 | 2588 | 0.137 | 0.086 | 0.725 | 0.275 | 0.816 | 0.764 | 0.183 | 0.467 |
| edgeRLRT    | 500  | 1000 | 11579 | 2500 | 0.167 | 0.079 | 0.667 | 0.333 | 0.822 | 0.775 | 0.222 | 0.484 |
| edgeQLF     | 473  | 1027 | 11552 | 2527 | 0.158 | 0.082 | 0.685 | 0.315 | 0.821 | 0.772 | 0.210 | 0.495 |
| EMDomics    | 620  | 880  | 11699 | 2380 | 0.207 | 0.070 | 0.587 | 0.413 | 0.831 | 0.791 | 0.276 | 0.475 |
| LIMMA       | 294  | 1206 | 11373 | 2706 | 0.098 | 0.096 | 0.804 | 0.196 | 0.808 | 0.749 | 0.131 | 0.463 |
| MAST        | 343  | 1157 | 11422 | 2657 | 0.114 | 0.092 | 0.771 | 0.229 | 0.811 | 0.755 | 0.152 | 0.458 |
| Monocle     | 559  | 941  | 11638 | 2441 | 0.186 | 0.075 | 0.627 | 0.373 | 0.827 | 0.783 | 0.248 | 0.503 |
| NBSeq       | 567  | 933  | 11646 | 2433 | 0.189 | 0.074 | 0.622 | 0.378 | 0.827 | 0.784 | 0.252 | 0.496 |
| NODES       | 519  | 981  | 11598 | 2481 | 0.173 | 0.078 | 0.654 | 0.346 | 0.824 | 0.778 | 0.231 | 0.502 |
| ROTS        | 307  | 1193 | 11386 | 2693 | 0.102 | 0.095 | 0.795 | 0.205 | 0.809 | 0.751 | 0.136 | 0.448 |
| scDD        | 354  | 1146 | 11433 | 2646 | 0.118 | 0.091 | 0.764 | 0.236 | 0.812 | 0.757 | 0.157 | 0.470 |
| T-test      | 595  | 905  | 11674 | 2405 | 0.198 | 0.072 | 0.603 | 0.397 | 0.829 | 0.788 | 0.264 | 0.510 |
| Wilcox      | 767  | 733  | 11846 | 2233 | 0.256 | 0.058 | 0.489 | 0.511 | 0.841 | 0.810 | 0.341 | 0.540 |
| NDEG = 2000 |      |      |       |      |       |       |       |       |       |       |       |       |
| BPSC        | 583  | 1417 | 11162 | 2417 | 0.194 | 0.113 | 0.709 | 0.292 | 0.822 | 0.754 | 0.233 | 0.524 |
| DECENT      | 591  | 1409 | 11170 | 2409 | 0.197 | 0.112 | 0.705 | 0.296 | 0.823 | 0.755 | 0.236 | 0.498 |
| DEGSeq      | 470  | 1530 | 11049 | 2530 | 0.157 | 0.122 | 0.765 | 0.235 | 0.814 | 0.739 | 0.188 | 0.477 |
| DESeqLRT    | 730  | 1270 | 11309 | 2270 | 0.243 | 0.101 | 0.635 | 0.365 | 0.833 | 0.773 | 0.292 | 0.522 |
| DESeqNB     | 947  | 1053 | 11526 | 2053 | 0.316 | 0.084 | 0.527 | 0.474 | 0.849 | 0.801 | 0.379 | 0.553 |
| DEsingle    | 870  | 1130 | 11449 | 2130 | 0.290 | 0.090 | 0.565 | 0.435 | 0.843 | 0.791 | 0.348 | 0.558 |
| EBSeq       | 567  | 1433 | 11146 | 2433 | 0.189 | 0.114 | 0.717 | 0.284 | 0.821 | 0.752 | 0.227 | 0.490 |
| edgeRLRT    | 683  | 1317 | 11262 | 2317 | 0.228 | 0.105 | 0.659 | 0.342 | 0.829 | 0.767 | 0.273 | 0.512 |
| edgeQLF     | 609  | 1391 | 11188 | 2391 | 0.203 | 0.111 | 0.696 | 0.305 | 0.824 | 0.757 | 0.244 | 0.518 |
| EMDomics    | 926  | 1074 | 11505 | 2074 | 0.309 | 0.085 | 0.537 | 0.463 | 0.847 | 0.798 | 0.370 | 0.508 |
| LIMMA       | 351  | 1649 | 10930 | 2649 | 0.117 | 0.131 | 0.825 | 0.176 | 0.805 | 0.724 | 0.140 | 0.475 |
| MAST        | 478  | 1522 | 11057 | 2522 | 0.159 | 0.121 | 0.761 | 0.239 | 0.814 | 0.740 | 0.191 | 0.477 |
| Monocle     | 735  | 1265 | 11314 | 2265 | 0.245 | 0.101 | 0.633 | 0.368 | 0.833 | 0.773 | 0.294 | 0.532 |
| NBSeq       | 748  | 1252 | 11327 | 2252 | 0.249 | 0.100 | 0.626 | 0.374 | 0.834 | 0.775 | 0.299 | 0.527 |
| NODES       | 774  | 1226 | 11353 | 2226 | 0.258 | 0.097 | 0.613 | 0.387 | 0.836 | 0.778 | 0.310 | 0.525 |
| ROTS        | 413  | 1587 | 10992 | 2587 | 0.138 | 0.126 | 0.794 | 0.207 | 0.809 | 0.732 | 0.165 | 0.466 |
| scDD        | 417  | 1583 | 10996 | 2583 | 0.139 | 0.126 | 0.792 | 0.209 | 0.810 | 0.733 | 0.167 | 0.487 |
| T-test      | 771  | 1229 | 11350 | 2229 | 0.257 | 0.098 | 0.615 | 0.386 | 0.836 | 0.778 | 0.308 | 0.541 |
| Wilcox      | 1010 | 990  | 11589 | 1990 | 0.337 | 0.079 | 0.495 | 0.505 | 0.853 | 0.809 | 0.404 | 0.581 |
| NDEG = 2500 |      |      |       |      |       |       |       |       |       |       |       |       |
| BPSC        | 701  | 1799 | 10780 | 2299 | 0.234 | 0.143 | 0.720 | 0.280 | 0.824 | 0.737 | 0.255 | 0.544 |
| DECENT      | 762  | 1738 | 10841 | 2238 | 0.254 | 0.138 | 0.695 | 0.305 | 0.829 | 0.745 | 0.277 | 0.522 |
| DEGSeq      | 570  | 1930 | 10649 | 2430 | 0.190 | 0.153 | 0.772 | 0.228 | 0.814 | 0.720 | 0.207 | 0.497 |

|             |      |      |       |      |       |       |       |       |       |       |       |       |
|-------------|------|------|-------|------|-------|-------|-------|-------|-------|-------|-------|-------|
| DESeqLRT    | 890  | 1610 | 10969 | 2110 | 0.297 | 0.128 | 0.644 | 0.356 | 0.839 | 0.761 | 0.324 | 0.554 |
| DESeqNB     | 1141 | 1359 | 11220 | 1859 | 0.380 | 0.108 | 0.544 | 0.456 | 0.858 | 0.793 | 0.415 | 0.598 |
| DEsingle    | 1019 | 1481 | 11098 | 1981 | 0.340 | 0.118 | 0.592 | 0.408 | 0.849 | 0.778 | 0.371 | 0.595 |
| EBSeq       | 729  | 1771 | 10808 | 2271 | 0.243 | 0.141 | 0.708 | 0.292 | 0.826 | 0.741 | 0.265 | 0.514 |
| edgeRLRT    | 844  | 1656 | 10923 | 2156 | 0.281 | 0.132 | 0.662 | 0.338 | 0.835 | 0.755 | 0.307 | 0.541 |
| edgeQLF     | 765  | 1735 | 10844 | 2235 | 0.255 | 0.138 | 0.694 | 0.306 | 0.829 | 0.745 | 0.278 | 0.540 |
| EMDomics    | 1053 | 1447 | 11132 | 1947 | 0.351 | 0.115 | 0.579 | 0.421 | 0.851 | 0.782 | 0.383 | 0.564 |
| LIMMA       | 385  | 2115 | 10464 | 2615 | 0.128 | 0.168 | 0.846 | 0.154 | 0.800 | 0.696 | 0.140 | 0.486 |
| MAST        | 600  | 1900 | 10679 | 2400 | 0.200 | 0.151 | 0.760 | 0.240 | 0.816 | 0.724 | 0.218 | 0.498 |
| Monocle     | 889  | 1611 | 10968 | 2111 | 0.296 | 0.128 | 0.644 | 0.356 | 0.839 | 0.761 | 0.323 | 0.561 |
| NBSeq       | 923  | 1577 | 11002 | 2077 | 0.308 | 0.125 | 0.631 | 0.369 | 0.841 | 0.765 | 0.336 | 0.559 |
| NODES       | 988  | 1512 | 11067 | 2012 | 0.329 | 0.120 | 0.605 | 0.395 | 0.846 | 0.774 | 0.359 | 0.557 |
| ROTS        | 510  | 1990 | 10589 | 2490 | 0.170 | 0.158 | 0.796 | 0.204 | 0.810 | 0.712 | 0.185 | 0.483 |
| scDD        | 434  | 2066 | 10513 | 2566 | 0.145 | 0.164 | 0.826 | 0.174 | 0.804 | 0.703 | 0.158 | 0.500 |
| T-test      | 934  | 1566 | 11013 | 2066 | 0.311 | 0.124 | 0.626 | 0.374 | 0.842 | 0.767 | 0.340 | 0.572 |
| Wilcox      | 1219 | 1281 | 11298 | 1781 | 0.406 | 0.102 | 0.512 | 0.488 | 0.864 | 0.803 | 0.443 | 0.624 |
| NDEG = 3000 |      |      |       |      |       |       |       |       |       |       |       |       |
| BPSC        | 813  | 2187 | 10392 | 2187 | 0.271 | 0.174 | 0.729 | 0.271 | 0.826 | 0.719 | 0.271 | 0.563 |
| DECENT      | 969  | 2031 | 10548 | 2031 | 0.323 | 0.161 | 0.677 | 0.323 | 0.839 | 0.739 | 0.323 | 0.546 |
| DEGSeq      | 675  | 2325 | 10254 | 2325 | 0.225 | 0.185 | 0.775 | 0.225 | 0.815 | 0.702 | 0.225 | 0.516 |
| DESeqLRT    | 1036 | 1964 | 10615 | 1964 | 0.345 | 0.156 | 0.655 | 0.345 | 0.844 | 0.748 | 0.345 | 0.584 |
| DESeqNB     | 1302 | 1698 | 10881 | 1698 | 0.434 | 0.135 | 0.566 | 0.434 | 0.865 | 0.782 | 0.434 | 0.639 |
| DEsingle    | 1172 | 1828 | 10751 | 1828 | 0.391 | 0.145 | 0.609 | 0.391 | 0.855 | 0.765 | 0.391 | 0.628 |
| EBSeq       | 887  | 2113 | 10466 | 2113 | 0.296 | 0.168 | 0.704 | 0.296 | 0.832 | 0.729 | 0.296 | 0.540 |
| edgeRLRT    | 998  | 2002 | 10577 | 2002 | 0.333 | 0.159 | 0.667 | 0.333 | 0.841 | 0.743 | 0.333 | 0.570 |
| edgeQLF     | 946  | 2054 | 10525 | 2054 | 0.315 | 0.163 | 0.685 | 0.315 | 0.837 | 0.736 | 0.315 | 0.563 |
| EMDomics    | 1160 | 1840 | 10739 | 1840 | 0.387 | 0.146 | 0.613 | 0.387 | 0.854 | 0.764 | 0.387 | 0.608 |
| LIMMA       | 434  | 2566 | 10013 | 2566 | 0.145 | 0.204 | 0.855 | 0.145 | 0.796 | 0.671 | 0.145 | 0.494 |
| MAST        | 730  | 2270 | 10309 | 2270 | 0.243 | 0.180 | 0.757 | 0.243 | 0.820 | 0.709 | 0.243 | 0.517 |
| Monocle     | 1031 | 1969 | 10610 | 1969 | 0.344 | 0.157 | 0.656 | 0.344 | 0.843 | 0.747 | 0.344 | 0.590 |
| NBSeq       | 1084 | 1916 | 10663 | 1916 | 0.361 | 0.152 | 0.639 | 0.361 | 0.848 | 0.754 | 0.361 | 0.590 |
| NODES       | 1151 | 1849 | 10730 | 1849 | 0.384 | 0.147 | 0.616 | 0.384 | 0.853 | 0.763 | 0.384 | 0.593 |
| ROTS        | 605  | 2395 | 10184 | 2395 | 0.202 | 0.190 | 0.798 | 0.202 | 0.810 | 0.693 | 0.202 | 0.501 |
| scDD        | 485  | 2515 | 10064 | 2515 | 0.162 | 0.200 | 0.838 | 0.162 | 0.800 | 0.677 | 0.162 | 0.509 |
| T-test      | 1102 | 1898 | 10681 | 1898 | 0.367 | 0.151 | 0.633 | 0.367 | 0.849 | 0.756 | 0.367 | 0.601 |
| Wilcox      | 1415 | 1585 | 10994 | 1585 | 0.472 | 0.126 | 0.528 | 0.472 | 0.874 | 0.797 | 0.472 | 0.665 |

TP: True Positives; FP: False Positives; TN: True Negatives; FN: False Negatives; TPR: True Positive Rate; FPR: False Positive Rate; FDR: False Discovery Rate; PPR: Positive Prediction Rate; NPV: Negative Prediction Value; ACC: Accuracy; F1: F1 score; AUROC: Area Under Receiver Operating Curve

**Table S12.** Evaluation of DE methods based on performance evaluation metrics for Grun scRNA-seq data.

|                | TP         | FP  | TN   | FN   | TPR   | FPR   | FDR   | PPR   | NPV   | ACC   | F1    | AUROC |
|----------------|------------|-----|------|------|-------|-------|-------|-------|-------|-------|-------|-------|
| <b>Methods</b> | DEG = 500  |     |      |      |       |       |       |       |       |       |       |       |
| BPSC           | 491        | 9   | 8561 | 2509 | 0.164 | 0.001 | 0.018 | 0.982 | 0.773 | 0.782 | 0.281 | 0.541 |
| DECENT         | 445        | 55  | 8515 | 2555 | 0.148 | 0.006 | 0.110 | 0.890 | 0.769 | 0.774 | 0.254 | 0.496 |
| DEGSeq         | 343        | 157 | 8419 | 2657 | 0.114 | 0.018 | 0.314 | 0.686 | 0.760 | 0.757 | 0.196 | 0.455 |
| DESeqLRT       | 404        | 96  | 8474 | 2596 | 0.135 | 0.011 | 0.192 | 0.808 | 0.765 | 0.767 | 0.231 | 0.489 |
| DESeqNB        | 424        | 76  | 8494 | 2576 | 0.141 | 0.009 | 0.152 | 0.848 | 0.767 | 0.771 | 0.242 | 0.495 |
| DEsingle       | 412        | 88  | 8482 | 2588 | 0.137 | 0.010 | 0.176 | 0.824 | 0.766 | 0.769 | 0.235 | 0.499 |
| EBSeq          | 412        | 88  | 8482 | 2588 | 0.137 | 0.010 | 0.176 | 0.824 | 0.766 | 0.769 | 0.235 | 0.471 |
| edgeRQLF       | 476        | 24  | 8546 | 2524 | 0.159 | 0.003 | 0.048 | 0.952 | 0.772 | 0.780 | 0.272 | 0.528 |
| edgeRLRT       | 457        | 43  | 8527 | 2543 | 0.152 | 0.005 | 0.086 | 0.914 | 0.770 | 0.776 | 0.261 | 0.508 |
| EMDomics       | 9          | 491 | 8566 | 2991 | 0.003 | 0.054 | 0.982 | 0.018 | 0.741 | 0.711 | 0.005 | 0.401 |
| LIMMA          | 381        | 119 | 8451 | 2619 | 0.127 | 0.014 | 0.238 | 0.762 | 0.763 | 0.763 | 0.218 | 0.471 |
| MAST           | 445        | 55  | 8515 | 2555 | 0.148 | 0.006 | 0.110 | 0.890 | 0.769 | 0.774 | 0.254 | 0.499 |
| Monocle        | 298        | 202 | 8368 | 2702 | 0.099 | 0.024 | 0.404 | 0.596 | 0.756 | 0.749 | 0.170 | 0.444 |
| NBSeq          | 228        | 272 | 8298 | 2772 | 0.076 | 0.032 | 0.544 | 0.456 | 0.750 | 0.737 | 0.130 | 0.444 |
| NODES          | 340        | 160 | 8410 | 2660 | 0.113 | 0.019 | 0.320 | 0.680 | 0.760 | 0.756 | 0.194 | 0.464 |
| ROTS           | 366        | 134 | 8436 | 2634 | 0.122 | 0.016 | 0.268 | 0.732 | 0.762 | 0.761 | 0.209 | 0.460 |
| scDD           | 299        | 201 | 8369 | 2701 | 0.100 | 0.023 | 0.402 | 0.598 | 0.756 | 0.749 | 0.171 | 0.456 |
| T-test         | 351        | 149 | 8421 | 2649 | 0.117 | 0.017 | 0.298 | 0.702 | 0.761 | 0.758 | 0.201 | 0.464 |
| Wilcox         | 410        | 90  | 8480 | 2590 | 0.137 | 0.011 | 0.180 | 0.820 | 0.766 | 0.768 | 0.234 | 0.486 |
|                | DEG = 1000 |     |      |      |       |       |       |       |       |       |       |       |
| BPSC           | 934        | 66  | 8504 | 2066 | 0.311 | 0.008 | 0.066 | 0.934 | 0.805 | 0.816 | 0.467 | 0.639 |
| DECENT         | 843        | 157 | 8413 | 2157 | 0.281 | 0.018 | 0.157 | 0.843 | 0.796 | 0.800 | 0.422 | 0.572 |
| DEGSeq         | 685        | 315 | 8261 | 2315 | 0.228 | 0.037 | 0.315 | 0.685 | 0.781 | 0.773 | 0.343 | 0.511 |
| DESeqLRT       | 713        | 287 | 8283 | 2287 | 0.238 | 0.033 | 0.287 | 0.713 | 0.784 | 0.778 | 0.357 | 0.558 |
| DESeqNB        | 781        | 219 | 8351 | 2219 | 0.260 | 0.026 | 0.219 | 0.781 | 0.790 | 0.789 | 0.391 | 0.563 |
| DEsingle       | 711        | 289 | 8281 | 2289 | 0.237 | 0.034 | 0.289 | 0.711 | 0.783 | 0.777 | 0.356 | 0.561 |
| EBSeq          | 749        | 251 | 8319 | 2251 | 0.250 | 0.029 | 0.251 | 0.749 | 0.787 | 0.784 | 0.375 | 0.554 |
| edgeRQLF       | 908        | 92  | 8478 | 2092 | 0.303 | 0.011 | 0.092 | 0.908 | 0.802 | 0.811 | 0.454 | 0.613 |
| edgeRLRT       | 846        | 154 | 8416 | 2154 | 0.282 | 0.018 | 0.154 | 0.846 | 0.796 | 0.801 | 0.423 | 0.592 |
| EMDomics       | 13         | 987 | 8564 | 2987 | 0.004 | 0.103 | 0.987 | 0.013 | 0.741 | 0.683 | 0.007 | 0.403 |
| LIMMA          | 724        | 276 | 8294 | 2276 | 0.241 | 0.032 | 0.276 | 0.724 | 0.785 | 0.779 | 0.362 | 0.540 |
| MAST           | 847        | 153 | 8417 | 2153 | 0.282 | 0.018 | 0.153 | 0.847 | 0.796 | 0.801 | 0.424 | 0.573 |
| Monocle        | 616        | 384 | 8186 | 2384 | 0.205 | 0.045 | 0.384 | 0.616 | 0.774 | 0.761 | 0.308 | 0.496 |
| NBSeq          | 370        | 630 | 7940 | 2630 | 0.123 | 0.074 | 0.630 | 0.370 | 0.751 | 0.718 | 0.185 | 0.477 |
| NODES          | 568        | 432 | 8138 | 2432 | 0.189 | 0.050 | 0.432 | 0.568 | 0.770 | 0.752 | 0.284 | 0.521 |
| ROTS           | 731        | 269 | 8301 | 2269 | 0.244 | 0.031 | 0.269 | 0.731 | 0.785 | 0.781 | 0.366 | 0.520 |
| scDD           | 525        | 475 | 8095 | 2475 | 0.175 | 0.055 | 0.475 | 0.525 | 0.766 | 0.745 | 0.263 | 0.506 |
| T-test         | 693        | 307 | 8263 | 2307 | 0.231 | 0.036 | 0.307 | 0.693 | 0.782 | 0.774 | 0.347 | 0.522 |
| Wilcox         | 781        | 219 | 8351 | 2219 | 0.260 | 0.026 | 0.219 | 0.781 | 0.790 | 0.789 | 0.391 | 0.546 |
|                | DEG = 1500 |     |      |      |       |       |       |       |       |       |       |       |

|            |      |      |      |      |       |       |       |       |       |       |       |       |
|------------|------|------|------|------|-------|-------|-------|-------|-------|-------|-------|-------|
| BPSC       | 1311 | 189  | 8381 | 1689 | 0.437 | 0.022 | 0.126 | 0.874 | 0.832 | 0.838 | 0.583 | 0.729 |
| DECENT     | 1215 | 285  | 8285 | 1785 | 0.405 | 0.033 | 0.190 | 0.810 | 0.823 | 0.821 | 0.540 | 0.650 |
| DEGSeq     | 978  | 522  | 8054 | 2022 | 0.326 | 0.061 | 0.348 | 0.652 | 0.799 | 0.780 | 0.435 | 0.575 |
| DESeqLRT   | 972  | 528  | 8042 | 2028 | 0.324 | 0.062 | 0.352 | 0.648 | 0.799 | 0.779 | 0.432 | 0.615 |
| DESeqNB    | 1139 | 361  | 8209 | 1861 | 0.380 | 0.042 | 0.241 | 0.759 | 0.815 | 0.808 | 0.506 | 0.625 |
| DEsingle   | 1023 | 477  | 8093 | 1977 | 0.341 | 0.056 | 0.318 | 0.682 | 0.804 | 0.788 | 0.455 | 0.612 |
| EBSeq      | 1071 | 429  | 8141 | 1929 | 0.357 | 0.050 | 0.286 | 0.714 | 0.808 | 0.796 | 0.476 | 0.619 |
| edgeRQLF   | 1305 | 195  | 8375 | 1695 | 0.435 | 0.023 | 0.130 | 0.870 | 0.832 | 0.837 | 0.580 | 0.696 |
| edgeRLRT   | 1215 | 285  | 8285 | 1785 | 0.405 | 0.033 | 0.190 | 0.810 | 0.823 | 0.821 | 0.540 | 0.663 |
| EMDomics   | 13   | 1487 | 8564 | 2987 | 0.004 | 0.148 | 0.991 | 0.009 | 0.741 | 0.657 | 0.006 | 0.403 |
| LIMMA      | 1019 | 481  | 8089 | 1981 | 0.340 | 0.056 | 0.321 | 0.679 | 0.803 | 0.787 | 0.453 | 0.606 |
| MAST       | 1241 | 259  | 8311 | 1759 | 0.414 | 0.030 | 0.173 | 0.827 | 0.825 | 0.826 | 0.552 | 0.647 |
| Monocle    | 936  | 564  | 8006 | 2064 | 0.312 | 0.066 | 0.376 | 0.624 | 0.795 | 0.773 | 0.416 | 0.548 |
| NBSeq      | 529  | 971  | 7599 | 2471 | 0.176 | 0.113 | 0.647 | 0.353 | 0.755 | 0.703 | 0.235 | 0.504 |
| NODES      | 705  | 795  | 7775 | 2295 | 0.235 | 0.093 | 0.530 | 0.470 | 0.772 | 0.733 | 0.313 | 0.564 |
| ROTS       | 1066 | 434  | 8136 | 1934 | 0.355 | 0.051 | 0.289 | 0.711 | 0.808 | 0.795 | 0.474 | 0.587 |
| scDD       | 696  | 804  | 7766 | 2304 | 0.232 | 0.094 | 0.536 | 0.464 | 0.771 | 0.731 | 0.309 | 0.546 |
| T-test     | 1037 | 463  | 8107 | 1963 | 0.346 | 0.054 | 0.309 | 0.691 | 0.805 | 0.790 | 0.461 | 0.578 |
| Wilcox     | 1124 | 376  | 8194 | 1876 | 0.375 | 0.044 | 0.251 | 0.749 | 0.814 | 0.805 | 0.500 | 0.616 |
| DEG = 2000 |      |      |      |      |       |       |       |       |       |       |       |       |
| BPSC       | 1677 | 323  | 8247 | 1323 | 0.559 | 0.038 | 0.162 | 0.839 | 0.862 | 0.858 | 0.671 | 0.802 |
| DECENT     | 1585 | 415  | 8155 | 1415 | 0.528 | 0.048 | 0.208 | 0.793 | 0.852 | 0.842 | 0.634 | 0.718 |
| DEGSeq     | 1319 | 681  | 7896 | 1681 | 0.440 | 0.079 | 0.341 | 0.660 | 0.824 | 0.796 | 0.528 | 0.624 |
| DESeqLRT   | 1195 | 805  | 7765 | 1805 | 0.398 | 0.094 | 0.403 | 0.598 | 0.811 | 0.774 | 0.478 | 0.666 |
| DESeqNB    | 1464 | 536  | 8034 | 1536 | 0.488 | 0.063 | 0.268 | 0.732 | 0.839 | 0.821 | 0.586 | 0.693 |
| DEsingle   | 1304 | 696  | 7874 | 1696 | 0.435 | 0.081 | 0.348 | 0.652 | 0.823 | 0.793 | 0.522 | 0.667 |
| EBSeq      | 1338 | 662  | 7908 | 1662 | 0.446 | 0.077 | 0.331 | 0.669 | 0.826 | 0.799 | 0.535 | 0.683 |
| edgeRQLF   | 1661 | 339  | 8231 | 1339 | 0.554 | 0.040 | 0.170 | 0.831 | 0.860 | 0.855 | 0.664 | 0.781 |
| edgeRLRT   | 1567 | 433  | 8137 | 1433 | 0.522 | 0.051 | 0.217 | 0.784 | 0.850 | 0.839 | 0.627 | 0.733 |
| EMDomics   | 13   | 1987 | 8564 | 2987 | 0.004 | 0.188 | 0.994 | 0.007 | 0.741 | 0.633 | 0.005 | 0.403 |
| LIMMA      | 1300 | 700  | 7870 | 1700 | 0.433 | 0.082 | 0.350 | 0.650 | 0.822 | 0.793 | 0.520 | 0.663 |
| MAST       | 1596 | 404  | 8166 | 1404 | 0.532 | 0.047 | 0.202 | 0.798 | 0.853 | 0.844 | 0.638 | 0.733 |
| Monocle    | 1255 | 745  | 7825 | 1745 | 0.418 | 0.087 | 0.373 | 0.628 | 0.818 | 0.785 | 0.502 | 0.600 |
| NBSeq      | 675  | 1325 | 7245 | 2325 | 0.225 | 0.155 | 0.663 | 0.338 | 0.757 | 0.685 | 0.270 | 0.529 |
| NODES      | 854  | 1146 | 7424 | 2146 | 0.285 | 0.134 | 0.573 | 0.427 | 0.776 | 0.715 | 0.342 | 0.593 |
| ROTS       | 1403 | 597  | 7973 | 1597 | 0.468 | 0.070 | 0.299 | 0.702 | 0.833 | 0.810 | 0.561 | 0.650 |
| scDD       | 843  | 1157 | 7413 | 2157 | 0.281 | 0.135 | 0.579 | 0.422 | 0.775 | 0.714 | 0.337 | 0.580 |
| T-test     | 1366 | 634  | 7936 | 1634 | 0.455 | 0.074 | 0.317 | 0.683 | 0.829 | 0.804 | 0.546 | 0.638 |
| Wilcox     | 1455 | 545  | 8025 | 1545 | 0.485 | 0.064 | 0.273 | 0.728 | 0.839 | 0.819 | 0.582 | 0.683 |
| DEG = 2500 |      |      |      |      |       |       |       |       |       |       |       |       |
| BPSC       | 1979 | 521  | 8049 | 1021 | 0.660 | 0.061 | 0.208 | 0.792 | 0.887 | 0.867 | 0.720 | 0.881 |
| DECENT     | 1884 | 616  | 7954 | 1116 | 0.628 | 0.072 | 0.246 | 0.754 | 0.877 | 0.850 | 0.685 | 0.806 |
| DEGSeq     | 1657 | 843  | 7734 | 1343 | 0.552 | 0.098 | 0.337 | 0.663 | 0.852 | 0.811 | 0.603 | 0.677 |



|            |      |      |      |      |       |       |       |       |       |       |       |       |
|------------|------|------|------|------|-------|-------|-------|-------|-------|-------|-------|-------|
| DESeqLRT   | 1390 | 1110 | 7460 | 1610 | 0.463 | 0.130 | 0.444 | 0.556 | 0.822 | 0.765 | 0.505 | 0.712 |
| DESeqNB    | 1762 | 738  | 7832 | 1238 | 0.587 | 0.086 | 0.295 | 0.705 | 0.864 | 0.829 | 0.641 | 0.761 |
| DEsingle   | 1581 | 919  | 7651 | 1419 | 0.527 | 0.107 | 0.368 | 0.632 | 0.844 | 0.798 | 0.575 | 0.720 |
| EBSeq      | 1588 | 912  | 7658 | 1412 | 0.529 | 0.106 | 0.365 | 0.635 | 0.844 | 0.799 | 0.577 | 0.739 |
| edgeRQLF   | 1936 | 564  | 8006 | 1064 | 0.645 | 0.066 | 0.226 | 0.774 | 0.883 | 0.859 | 0.704 | 0.870 |
| edgeRLRT   | 1861 | 639  | 7931 | 1139 | 0.620 | 0.075 | 0.256 | 0.744 | 0.874 | 0.846 | 0.677 | 0.814 |
| EMDomics   | 38   | 2462 | 8560 | 2962 | 0.013 | 0.223 | 0.985 | 0.015 | 0.743 | 0.613 | 0.014 | 0.405 |
| LIMMA      | 1537 | 963  | 7607 | 1463 | 0.512 | 0.112 | 0.385 | 0.615 | 0.839 | 0.790 | 0.559 | 0.720 |
| MAST       | 1852 | 648  | 7922 | 1148 | 0.617 | 0.076 | 0.259 | 0.741 | 0.873 | 0.845 | 0.673 | 0.823 |
| Monocle    | 1561 | 939  | 7631 | 1439 | 0.520 | 0.110 | 0.376 | 0.624 | 0.841 | 0.794 | 0.568 | 0.657 |
| NBSeq      | 797  | 1703 | 6867 | 2203 | 0.266 | 0.199 | 0.681 | 0.319 | 0.757 | 0.662 | 0.290 | 0.555 |
| NODES      | 975  | 1525 | 7045 | 2025 | 0.325 | 0.178 | 0.610 | 0.390 | 0.777 | 0.693 | 0.355 | 0.621 |
| ROTS       | 1700 | 800  | 7770 | 1300 | 0.567 | 0.093 | 0.320 | 0.680 | 0.857 | 0.818 | 0.618 | 0.718 |
| scDD       | 936  | 1564 | 7006 | 2064 | 0.312 | 0.182 | 0.626 | 0.374 | 0.772 | 0.686 | 0.340 | 0.610 |
| T-test     | 1670 | 830  | 7740 | 1330 | 0.557 | 0.097 | 0.332 | 0.668 | 0.853 | 0.813 | 0.607 | 0.703 |
| Wilcox     | 1741 | 759  | 7811 | 1259 | 0.580 | 0.089 | 0.304 | 0.696 | 0.861 | 0.826 | 0.633 | 0.755 |
| DEG = 3000 |      |      |      |      |       |       |       |       |       |       |       |       |
| BPSC       | 2199 | 801  | 7769 | 801  | 0.733 | 0.093 | 0.267 | 0.733 | 0.907 | 0.862 | 0.733 | 0.958 |
| DECENT     | 2118 | 882  | 7688 | 882  | 0.706 | 0.103 | 0.294 | 0.706 | 0.897 | 0.848 | 0.706 | 0.886 |
| DEGSeq     | 1941 | 1059 | 7518 | 1059 | 0.647 | 0.123 | 0.353 | 0.647 | 0.877 | 0.817 | 0.647 | 0.745 |
| DESeqLRT   | 1549 | 1451 | 7119 | 1451 | 0.516 | 0.169 | 0.484 | 0.516 | 0.831 | 0.749 | 0.516 | 0.753 |
| DESeqNB    | 1991 | 1009 | 7561 | 1009 | 0.664 | 0.118 | 0.336 | 0.664 | 0.882 | 0.826 | 0.664 | 0.832 |
| DEsingle   | 1787 | 1213 | 7357 | 1213 | 0.596 | 0.142 | 0.404 | 0.596 | 0.858 | 0.790 | 0.596 | 0.779 |
| EBSeq      | 1787 | 1213 | 7357 | 1213 | 0.596 | 0.142 | 0.404 | 0.596 | 0.858 | 0.790 | 0.596 | 0.795 |
| edgeRQLF   | 2171 | 829  | 7741 | 829  | 0.724 | 0.097 | 0.276 | 0.724 | 0.903 | 0.857 | 0.724 | 0.940 |
| edgeRLRT   | 2083 | 917  | 7653 | 917  | 0.694 | 0.107 | 0.306 | 0.694 | 0.893 | 0.841 | 0.694 | 0.888 |
| EMDomics   | 47   | 2953 | 8557 | 2953 | 0.016 | 0.257 | 0.984 | 0.016 | 0.743 | 0.593 | 0.016 | 0.406 |
| LIMMA      | 1757 | 1243 | 7327 | 1243 | 0.586 | 0.145 | 0.414 | 0.586 | 0.855 | 0.785 | 0.586 | 0.772 |
| MAST       | 2076 | 924  | 7646 | 924  | 0.692 | 0.108 | 0.308 | 0.692 | 0.892 | 0.840 | 0.692 | 0.893 |
| Monocle    | 1816 | 1184 | 7386 | 1184 | 0.605 | 0.138 | 0.395 | 0.605 | 0.862 | 0.795 | 0.605 | 0.721 |
| NBSeq      | 886  | 2114 | 6456 | 2114 | 0.295 | 0.247 | 0.705 | 0.295 | 0.753 | 0.635 | 0.295 | 0.579 |
| NODES      | 1091 | 1909 | 6661 | 1909 | 0.364 | 0.223 | 0.636 | 0.364 | 0.777 | 0.670 | 0.364 | 0.646 |
| ROTS       | 1949 | 1051 | 7519 | 1051 | 0.650 | 0.123 | 0.350 | 0.650 | 0.877 | 0.818 | 0.650 | 0.788 |
| scDD       | 1022 | 1978 | 6592 | 1978 | 0.341 | 0.231 | 0.659 | 0.341 | 0.769 | 0.658 | 0.341 | 0.635 |
| T-test     | 1935 | 1065 | 7505 | 1065 | 0.645 | 0.124 | 0.355 | 0.645 | 0.876 | 0.816 | 0.645 | 0.769 |
| Wilcox     | 1967 | 1033 | 7537 | 1033 | 0.656 | 0.121 | 0.344 | 0.656 | 0.879 | 0.821 | 0.656 | 0.826 |

TP: True Positives; FP: False Positives; TN: True Negatives; FN: False Negatives; TPR: True Positive Rate; FPR: False Positive Rate; FDR: False Discovery Rate; PPR: Positive Prediction Rate; NPV: Negative Prediction Value; ACC: Accuracy; F1: F1 score; AUROC: Area Under Receiver Operating Curve

**Table S13.** Evaluation of DE methods based on performance evaluation metrics for Savas scRNA-seq data.

| Methods | TP | FP | TN | FN | TPR | FPR | FDR | PPR | NPV | ACC | F1 | AUROC |
|---------|----|----|----|----|-----|-----|-----|-----|-----|-----|----|-------|
|---------|----|----|----|----|-----|-----|-----|-----|-----|-----|----|-------|

| DEG = 500  |     |      |      |      |          |       |       |       |       |       |       |       |
|------------|-----|------|------|------|----------|-------|-------|-------|-------|-------|-------|-------|
| BPSC       | 108 | 392  | 9361 | 2892 | 0.036    | 0.040 | 0.784 | 0.216 | 0.764 | 0.742 | 0.062 | 0.420 |
| DECENT     | 224 | 276  | 9477 | 2776 | 0.074667 | 0.028 | 0.552 | 0.448 | 0.773 | 0.761 | 0.128 | 0.430 |
| DEGSeq     | 115 | 385  | 9369 | 2885 | 0.038333 | 0.039 | 0.770 | 0.230 | 0.765 | 0.744 | 0.066 | 0.418 |
| DESeqNB    | 90  | 410  | 9343 | 2910 | 0.03     | 0.042 | 0.820 | 0.180 | 0.763 | 0.740 | 0.051 | 0.415 |
| DESeqLRT   | 97  | 403  | 9350 | 2903 | 0.032333 | 0.041 | 0.806 | 0.194 | 0.763 | 0.741 | 0.055 | 0.424 |
| DEsingle   | 132 | 368  | 9385 | 2868 | 0.044    | 0.038 | 0.736 | 0.264 | 0.766 | 0.746 | 0.075 | 0.422 |
| EBSeq      | 444 | 56   | 9697 | 2556 | 0.148    | 0.006 | 0.112 | 0.888 | 0.791 | 0.795 | 0.254 | 0.483 |
| edgeRLRT   | 180 | 320  | 9433 | 2820 | 0.06     | 0.033 | 0.640 | 0.360 | 0.770 | 0.754 | 0.103 | 0.433 |
| edgeRQLF   | 279 | 221  | 9532 | 2721 | 0.093    | 0.023 | 0.442 | 0.558 | 0.778 | 0.769 | 0.159 | 0.462 |
| LIMMA      | 175 | 325  | 9428 | 2825 | 0.058333 | 0.033 | 0.650 | 0.350 | 0.769 | 0.753 | 0.100 | 0.430 |
| MAST       | 117 | 383  | 9370 | 2883 | 0.039    | 0.039 | 0.766 | 0.234 | 0.765 | 0.744 | 0.067 | 0.423 |
| Monocle    | 250 | 250  | 9503 | 2750 | 0.083333 | 0.026 | 0.500 | 0.500 | 0.776 | 0.765 | 0.143 | 0.433 |
| NBSeq      | 243 | 257  | 9496 | 2757 | 0.081    | 0.026 | 0.514 | 0.486 | 0.775 | 0.764 | 0.139 | 0.437 |
| NODES      | 140 | 360  | 9393 | 2860 | 0.046667 | 0.037 | 0.720 | 0.280 | 0.767 | 0.748 | 0.080 | 0.429 |
| ROTS       | 104 | 396  | 9357 | 2896 | 0.034667 | 0.041 | 0.792 | 0.208 | 0.764 | 0.742 | 0.059 | 0.418 |
| scDD       | 30  | 470  | 9283 | 2970 | 0.01     | 0.048 | 0.940 | 0.060 | 0.758 | 0.730 | 0.017 | 0.405 |
| T-test     | 191 | 309  | 9444 | 2809 | 0.063667 | 0.032 | 0.618 | 0.382 | 0.771 | 0.756 | 0.109 | 0.432 |
| Wilcox     | 233 | 267  | 9487 | 2767 | 0.077667 | 0.027 | 0.534 | 0.466 | 0.774 | 0.762 | 0.133 | 0.441 |
| DEG = 1000 |     |      |      |      |          |       |       |       |       |       |       |       |
| BPSC       | 232 | 768  | 8985 | 2768 | 0.077333 | 0.079 | 0.768 | 0.232 | 0.764 | 0.723 | 0.116 | 0.437 |
| DECENT     | 469 | 531  | 9222 | 2531 | 0.156333 | 0.054 | 0.531 | 0.469 | 0.785 | 0.760 | 0.235 | 0.471 |
| DEGSeq     | 234 | 766  | 8995 | 2766 | 0.078    | 0.078 | 0.766 | 0.234 | 0.765 | 0.723 | 0.117 | 0.437 |
| DESeqNB    | 188 | 812  | 8941 | 2812 | 0.062667 | 0.083 | 0.812 | 0.188 | 0.761 | 0.716 | 0.094 | 0.430 |
| DESeqLRT   | 137 | 863  | 8890 | 2863 | 0.045667 | 0.088 | 0.863 | 0.137 | 0.756 | 0.708 | 0.069 | 0.432 |
| DEsingle   | 286 | 714  | 9039 | 2714 | 0.095333 | 0.073 | 0.714 | 0.286 | 0.769 | 0.731 | 0.143 | 0.444 |
| EBSeq      | 779 | 221  | 9532 | 2221 | 0.259667 | 0.023 | 0.221 | 0.779 | 0.811 | 0.809 | 0.390 | 0.585 |
| edgeRLRT   | 358 | 642  | 9111 | 2642 | 0.119333 | 0.066 | 0.642 | 0.358 | 0.775 | 0.742 | 0.179 | 0.463 |
| edgeRQLF   | 445 | 555  | 9198 | 2555 | 0.148333 | 0.057 | 0.555 | 0.445 | 0.783 | 0.756 | 0.223 | 0.498 |
| LIMMA      | 340 | 660  | 9093 | 2660 | 0.113333 | 0.068 | 0.660 | 0.340 | 0.774 | 0.740 | 0.170 | 0.457 |
| MAST       | 196 | 804  | 8949 | 2804 | 0.065333 | 0.082 | 0.804 | 0.196 | 0.761 | 0.717 | 0.098 | 0.438 |
| Monocle    | 513 | 487  | 9266 | 2487 | 0.171    | 0.050 | 0.487 | 0.513 | 0.788 | 0.767 | 0.257 | 0.479 |
| NBSeq      | 504 | 496  | 9257 | 2496 | 0.168    | 0.051 | 0.496 | 0.504 | 0.788 | 0.765 | 0.252 | 0.480 |
| NODES      | 252 | 748  | 9005 | 2748 | 0.084    | 0.077 | 0.748 | 0.252 | 0.766 | 0.726 | 0.126 | 0.448 |
| ROTS       | 211 | 789  | 8964 | 2789 | 0.070333 | 0.081 | 0.789 | 0.211 | 0.763 | 0.719 | 0.106 | 0.434 |
| scDD       | 64  | 936  | 8817 | 2936 | 0.021333 | 0.096 | 0.936 | 0.064 | 0.750 | 0.696 | 0.032 | 0.410 |
| T-test     | 372 | 628  | 9125 | 2628 | 0.124    | 0.064 | 0.628 | 0.372 | 0.776 | 0.745 | 0.186 | 0.464 |
| Wilcox     | 435 | 565  | 9189 | 2565 | 0.145    | 0.058 | 0.565 | 0.435 | 0.782 | 0.755 | 0.218 | 0.480 |
| DEG = 1500 |     |      |      |      |          |       |       |       |       |       |       |       |
| BPSC       | 363 | 1137 | 8616 | 2637 | 0.121    | 0.117 | 0.758 | 0.242 | 0.766 | 0.704 | 0.161 | 0.457 |
| DECENT     | 713 | 787  | 8966 | 2287 | 0.237667 | 0.081 | 0.525 | 0.475 | 0.797 | 0.759 | 0.317 | 0.512 |
| DEGSeq     | 353 | 1147 | 8649 | 2647 | 0.117667 | 0.117 | 0.765 | 0.235 | 0.766 | 0.704 | 0.157 | 0.458 |

|            |      |      |      |      |          |       |       |       |       |       |       |       |
|------------|------|------|------|------|----------|-------|-------|-------|-------|-------|-------|-------|
| DESeqNB    | 291  | 1209 | 8544 | 2709 | 0.097    | 0.124 | 0.806 | 0.194 | 0.759 | 0.693 | 0.129 | 0.446 |
| DESeqLRT   | 183  | 1317 | 8436 | 2817 | 0.061    | 0.135 | 0.878 | 0.122 | 0.750 | 0.676 | 0.081 | 0.439 |
| DEsingle   | 431  | 1069 | 8684 | 2569 | 0.143667 | 0.110 | 0.713 | 0.287 | 0.772 | 0.715 | 0.192 | 0.469 |
| EBSeq      | 1010 | 490  | 9263 | 1990 | 0.336667 | 0.050 | 0.327 | 0.673 | 0.823 | 0.806 | 0.449 | 0.649 |
| edgeRLRT   | 531  | 969  | 8784 | 2469 | 0.177    | 0.099 | 0.646 | 0.354 | 0.781 | 0.730 | 0.236 | 0.492 |
| edgeRQLF   | 600  | 900  | 8853 | 2400 | 0.2      | 0.092 | 0.600 | 0.400 | 0.787 | 0.741 | 0.267 | 0.527 |
| LIMMA      | 529  | 971  | 8782 | 2471 | 0.176333 | 0.100 | 0.647 | 0.353 | 0.780 | 0.730 | 0.235 | 0.486 |
| MAST       | 294  | 1206 | 8547 | 2706 | 0.098    | 0.124 | 0.804 | 0.196 | 0.760 | 0.693 | 0.131 | 0.453 |
| Monocle    | 752  | 748  | 9005 | 2248 | 0.250667 | 0.077 | 0.499 | 0.501 | 0.800 | 0.765 | 0.334 | 0.526 |
| NBSeq      | 737  | 763  | 8990 | 2263 | 0.245667 | 0.078 | 0.509 | 0.491 | 0.799 | 0.763 | 0.328 | 0.524 |
| NODES      | 348  | 1152 | 8601 | 2652 | 0.116    | 0.118 | 0.768 | 0.232 | 0.764 | 0.702 | 0.155 | 0.467 |
| ROTS       | 324  | 1176 | 8577 | 2676 | 0.108    | 0.121 | 0.784 | 0.216 | 0.762 | 0.698 | 0.144 | 0.452 |
| scDD       | 107  | 1393 | 8360 | 2893 | 0.035667 | 0.143 | 0.929 | 0.071 | 0.743 | 0.664 | 0.048 | 0.416 |
| T-test     | 562  | 938  | 8815 | 2438 | 0.187333 | 0.096 | 0.625 | 0.375 | 0.783 | 0.735 | 0.250 | 0.494 |
| Wilcox     | 605  | 895  | 8859 | 2395 | 0.201667 | 0.092 | 0.597 | 0.403 | 0.787 | 0.742 | 0.269 | 0.515 |
| DEG = 2000 |      |      |      |      |          |       |       |       |       |       |       |       |
| BPSC       | 488  | 1512 | 8241 | 2512 | 0.162667 | 0.155 | 0.756 | 0.244 | 0.766 | 0.684 | 0.195 | 0.478 |
| DECENT     | 945  | 1055 | 8698 | 2055 | 0.315    | 0.108 | 0.528 | 0.473 | 0.809 | 0.756 | 0.378 | 0.553 |
| DEGSeq     | 463  | 1537 | 8324 | 2537 | 0.154333 | 0.156 | 0.769 | 0.232 | 0.766 | 0.683 | 0.185 | 0.478 |
| DESeqNB    | 396  | 1604 | 8149 | 2604 | 0.132    | 0.164 | 0.802 | 0.198 | 0.758 | 0.670 | 0.158 | 0.462 |
| DESeqLRT   | 303  | 1697 | 8056 | 2697 | 0.101    | 0.174 | 0.849 | 0.152 | 0.749 | 0.655 | 0.121 | 0.448 |
| DEsingle   | 574  | 1426 | 8327 | 2426 | 0.191333 | 0.146 | 0.713 | 0.287 | 0.774 | 0.698 | 0.230 | 0.493 |
| EBSeq      | 1177 | 823  | 8930 | 1823 | 0.392333 | 0.084 | 0.412 | 0.589 | 0.830 | 0.793 | 0.471 | 0.696 |
| edgeRLRT   | 698  | 1302 | 8451 | 2302 | 0.232667 | 0.133 | 0.651 | 0.349 | 0.786 | 0.717 | 0.279 | 0.521 |
| edgeRQLF   | 763  | 1237 | 8516 | 2237 | 0.254333 | 0.127 | 0.619 | 0.382 | 0.792 | 0.728 | 0.305 | 0.554 |
| LIMMA      | 731  | 1269 | 8484 | 2269 | 0.243667 | 0.130 | 0.635 | 0.366 | 0.789 | 0.723 | 0.292 | 0.514 |
| MAST       | 390  | 1610 | 8143 | 2610 | 0.13     | 0.165 | 0.805 | 0.195 | 0.757 | 0.669 | 0.156 | 0.468 |
| Monocle    | 972  | 1028 | 8725 | 2028 | 0.324    | 0.105 | 0.514 | 0.486 | 0.811 | 0.760 | 0.389 | 0.570 |
| NBSeq      | 941  | 1059 | 8694 | 2059 | 0.313667 | 0.109 | 0.530 | 0.471 | 0.809 | 0.756 | 0.376 | 0.568 |
| NODES      | 440  | 1560 | 8193 | 2560 | 0.146667 | 0.160 | 0.780 | 0.220 | 0.762 | 0.677 | 0.176 | 0.483 |
| ROTS       | 432  | 1568 | 8185 | 2568 | 0.144    | 0.161 | 0.784 | 0.216 | 0.761 | 0.676 | 0.173 | 0.470 |
| scDD       | 145  | 1855 | 7898 | 2855 | 0.048333 | 0.190 | 0.928 | 0.073 | 0.734 | 0.631 | 0.058 | 0.423 |
| T-test     | 727  | 1273 | 8480 | 2273 | 0.242333 | 0.131 | 0.637 | 0.364 | 0.789 | 0.722 | 0.291 | 0.526 |
| Wilcox     | 743  | 1257 | 8497 | 2257 | 0.247667 | 0.129 | 0.629 | 0.372 | 0.790 | 0.724 | 0.297 | 0.547 |
| DEG = 2500 |      |      |      |      |          |       |       |       |       |       |       |       |
| BPSC       | 613  | 1887 | 7866 | 2387 | 0.204333 | 0.193 | 0.755 | 0.245 | 0.767 | 0.665 | 0.223 | 0.500 |
| DECENT     | 1113 | 1387 | 8366 | 1887 | 0.371    | 0.142 | 0.555 | 0.445 | 0.816 | 0.743 | 0.405 | 0.599 |
| DEGSeq     | 553  | 1947 | 7973 | 2447 | 0.184333 | 0.196 | 0.779 | 0.221 | 0.765 | 0.660 | 0.201 | 0.497 |
| DESeqNB    | 504  | 1996 | 7757 | 2496 | 0.168    | 0.205 | 0.798 | 0.202 | 0.757 | 0.648 | 0.183 | 0.480 |
| DESeqLRT   | 433  | 2067 | 7686 | 2567 | 0.144333 | 0.212 | 0.827 | 0.173 | 0.750 | 0.637 | 0.157 | 0.461 |
| DEsingle   | 710  | 1790 | 7963 | 2290 | 0.236667 | 0.184 | 0.716 | 0.284 | 0.777 | 0.680 | 0.258 | 0.518 |
| EBSeq      | 1289 | 1211 | 8542 | 1711 | 0.429667 | 0.124 | 0.484 | 0.516 | 0.833 | 0.771 | 0.469 | 0.734 |
| edgeRLRT   | 875  | 1625 | 8128 | 2125 | 0.291667 | 0.167 | 0.650 | 0.350 | 0.793 | 0.706 | 0.318 | 0.549 |

|            |      |      |      |      |          |       |       |       |       |       |       |       |
|------------|------|------|------|------|----------|-------|-------|-------|-------|-------|-------|-------|
| edgeRQLF   | 914  | 1586 | 8167 | 2086 | 0.304667 | 0.163 | 0.634 | 0.366 | 0.797 | 0.712 | 0.332 | 0.581 |
| LIMMA      | 912  | 1588 | 8165 | 2088 | 0.304    | 0.163 | 0.635 | 0.365 | 0.796 | 0.712 | 0.332 | 0.547 |
| MAST       | 482  | 2018 | 7735 | 2518 | 0.160667 | 0.207 | 0.807 | 0.193 | 0.754 | 0.644 | 0.175 | 0.484 |
| Monocle    | 1199 | 1301 | 8452 | 1801 | 0.399667 | 0.133 | 0.520 | 0.480 | 0.824 | 0.757 | 0.436 | 0.611 |
| NBSeq      | 1150 | 1350 | 8403 | 1850 | 0.383333 | 0.138 | 0.540 | 0.460 | 0.820 | 0.749 | 0.418 | 0.607 |
| NODES      | 538  | 1962 | 7791 | 2462 | 0.179333 | 0.201 | 0.785 | 0.215 | 0.760 | 0.653 | 0.196 | 0.499 |
| ROTS       | 550  | 1950 | 7803 | 2450 | 0.183333 | 0.200 | 0.780 | 0.220 | 0.761 | 0.655 | 0.200 | 0.489 |
| scDD       | 190  | 2310 | 7443 | 2810 | 0.063333 | 0.237 | 0.924 | 0.076 | 0.726 | 0.599 | 0.069 | 0.429 |
| T-test     | 910  | 1590 | 8163 | 2090 | 0.303333 | 0.163 | 0.636 | 0.364 | 0.796 | 0.711 | 0.331 | 0.555 |
| Wilcox     | 873  | 1627 | 8127 | 2127 | 0.291    | 0.167 | 0.651 | 0.349 | 0.793 | 0.706 | 0.317 | 0.575 |
| DEG = 3000 |      |      |      |      |          |       |       |       |       |       |       |       |
| BPSC       | 756  | 2244 | 7509 | 2244 | 0.252    | 0.230 | 0.748 | 0.252 | 0.770 | 0.648 | 0.252 | 0.520 |
| DECENT     | 1227 | 1773 | 7980 | 1773 | 0.409    | 0.182 | 0.591 | 0.409 | 0.818 | 0.722 | 0.409 | 0.641 |
| DEGSeq     | 665  | 2335 | 7656 | 2335 | 0.221667 | 0.234 | 0.778 | 0.222 | 0.766 | 0.641 | 0.222 | 0.515 |
| DESeqNB    | 616  | 2384 | 7369 | 2384 | 0.205333 | 0.244 | 0.795 | 0.205 | 0.756 | 0.626 | 0.205 | 0.498 |
| DESeqLRT   | 554  | 2446 | 7307 | 2446 | 0.184667 | 0.251 | 0.815 | 0.185 | 0.749 | 0.616 | 0.185 | 0.477 |
| DEsingle   | 840  | 2160 | 7593 | 2160 | 0.28     | 0.221 | 0.720 | 0.280 | 0.779 | 0.661 | 0.280 | 0.542 |
| EBSeq      | 1342 | 1658 | 8095 | 1658 | 0.447333 | 0.170 | 0.553 | 0.447 | 0.830 | 0.740 | 0.447 | 0.762 |
| edgeRLRT   | 1031 | 1969 | 7784 | 1969 | 0.343667 | 0.202 | 0.656 | 0.344 | 0.798 | 0.691 | 0.344 | 0.578 |
| edgeRQLF   | 1067 | 1933 | 7820 | 1933 | 0.355667 | 0.198 | 0.644 | 0.356 | 0.802 | 0.697 | 0.356 | 0.608 |
| LIMMA      | 1100 | 1900 | 7853 | 1900 | 0.366667 | 0.195 | 0.633 | 0.367 | 0.805 | 0.702 | 0.367 | 0.578 |
| MAST       | 605  | 2395 | 7358 | 2395 | 0.201667 | 0.246 | 0.798 | 0.202 | 0.754 | 0.624 | 0.202 | 0.499 |
| Monocle    | 1414 | 1586 | 8167 | 1586 | 0.471333 | 0.163 | 0.529 | 0.471 | 0.837 | 0.751 | 0.471 | 0.652 |
| NBSeq      | 1316 | 1684 | 8069 | 1684 | 0.438667 | 0.173 | 0.561 | 0.439 | 0.827 | 0.736 | 0.439 | 0.648 |
| NODES      | 611  | 2389 | 7364 | 2389 | 0.203667 | 0.245 | 0.796 | 0.204 | 0.755 | 0.625 | 0.204 | 0.516 |
| ROTS       | 653  | 2347 | 7406 | 2347 | 0.217667 | 0.241 | 0.782 | 0.218 | 0.759 | 0.632 | 0.218 | 0.507 |
| scDD       | 225  | 2775 | 6978 | 2775 | 0.075    | 0.285 | 0.925 | 0.075 | 0.715 | 0.565 | 0.075 | 0.436 |
| T-test     | 1090 | 1910 | 7843 | 1910 | 0.363333 | 0.196 | 0.637 | 0.363 | 0.804 | 0.700 | 0.363 | 0.585 |
| Wilcox     | 1007 | 1993 | 7761 | 1993 | 0.335667 | 0.204 | 0.664 | 0.336 | 0.796 | 0.687 | 0.336 | 0.600 |

TP: True Positives; FP: False Positives; TN: True Negatives; FN: False Negatives; TPR: True Positive Rate; FPR: False Positive Rate; FDR: False Discovery Rate; PPR: Positive Prediction Rate; NPV: Negative Prediction Value; ACC: Accuracy; F1: F1 score; AUROC: Area Under Receiver Operating Curve

**Table S14.** Evaluation of DE methods based on performance evaluation metrics for Soumillon1 scRNA-seq data.

| Methods   | TP | FP | TN | FN | TPR | FPR | FDR | PPR | NPV | ACC | F1 | AUROC |
|-----------|----|----|----|----|-----|-----|-----|-----|-----|-----|----|-------|
| DEG = 500 |    |    |    |    |     |     |     |     |     |     |    |       |

|            |     |     |      |      |       |       |       |       |       |       |       |       |
|------------|-----|-----|------|------|-------|-------|-------|-------|-------|-------|-------|-------|
| BPSC       | 285 | 215 | 9074 | 2715 | 0.095 | 0.023 | 0.430 | 0.570 | 0.770 | 0.762 | 0.163 | 0.465 |
| DECENT     | 460 | 40  | 9249 | 2540 | 0.153 | 0.004 | 0.080 | 0.920 | 0.785 | 0.790 | 0.263 | 0.521 |
| DEGSeq     | 244 | 256 | 9033 | 2756 | 0.081 | 0.028 | 0.512 | 0.488 | 0.766 | 0.755 | 0.139 | 0.441 |
| DESeqLRT   | 106 | 394 | 8895 | 2894 | 0.035 | 0.042 | 0.788 | 0.212 | 0.755 | 0.732 | 0.061 | 0.426 |
| DESeqNB    | 380 | 120 | 9169 | 2620 | 0.127 | 0.013 | 0.240 | 0.760 | 0.778 | 0.777 | 0.217 | 0.499 |
| DEsingle   | 312 | 188 | 9101 | 2688 | 0.104 | 0.020 | 0.376 | 0.624 | 0.772 | 0.766 | 0.178 | 0.470 |
| EBSeq      | 419 | 81  | 9208 | 2581 | 0.140 | 0.009 | 0.162 | 0.838 | 0.781 | 0.783 | 0.239 | 0.492 |
| edgeRQLF   | 439 | 61  | 9228 | 2561 | 0.146 | 0.007 | 0.122 | 0.878 | 0.783 | 0.787 | 0.251 | 0.504 |
| edgeRLRT   | 319 | 181 | 9108 | 2681 | 0.106 | 0.019 | 0.362 | 0.638 | 0.773 | 0.767 | 0.182 | 0.472 |
| EMDomics   | 281 | 219 | 9070 | 2719 | 0.094 | 0.024 | 0.438 | 0.562 | 0.769 | 0.761 | 0.161 | 0.471 |
| LIMMA      | 238 | 262 | 9027 | 2762 | 0.079 | 0.028 | 0.524 | 0.476 | 0.766 | 0.754 | 0.136 | 0.451 |
| MAST       | 368 | 132 | 9157 | 2632 | 0.123 | 0.014 | 0.264 | 0.736 | 0.777 | 0.775 | 0.210 | 0.479 |
| Monocle    | 294 | 206 | 9083 | 2706 | 0.098 | 0.022 | 0.412 | 0.588 | 0.770 | 0.763 | 0.168 | 0.462 |
| NBSeq      | 380 | 120 | 9169 | 2620 | 0.127 | 0.013 | 0.240 | 0.760 | 0.778 | 0.777 | 0.217 | 0.492 |
| NODES      | 249 | 251 | 9038 | 2751 | 0.083 | 0.027 | 0.502 | 0.498 | 0.767 | 0.756 | 0.142 | 0.459 |
| ROTS       | 194 | 306 | 8983 | 2806 | 0.065 | 0.033 | 0.612 | 0.388 | 0.762 | 0.747 | 0.111 | 0.438 |
| scDD       | 133 | 367 | 8922 | 2867 | 0.044 | 0.040 | 0.734 | 0.266 | 0.757 | 0.737 | 0.076 | 0.424 |
| T-test     | 310 | 190 | 9099 | 2690 | 0.103 | 0.020 | 0.380 | 0.620 | 0.772 | 0.766 | 0.177 | 0.465 |
| Wilcox     | 300 | 200 | 9089 | 2700 | 0.100 | 0.022 | 0.400 | 0.600 | 0.771 | 0.764 | 0.171 | 0.467 |
| DEG = 1000 |     |     |      |      |       |       |       |       |       |       |       |       |
| BPSC       | 483 | 517 | 8772 | 2517 | 0.161 | 0.056 | 0.517 | 0.483 | 0.777 | 0.753 | 0.242 | 0.502 |
| DECENT     | 771 | 229 | 9060 | 2229 | 0.257 | 0.025 | 0.229 | 0.771 | 0.803 | 0.800 | 0.386 | 0.598 |
| DEGSeq     | 492 | 508 | 8782 | 2508 | 0.164 | 0.055 | 0.508 | 0.492 | 0.778 | 0.755 | 0.246 | 0.483 |
| DESeqLRT   | 159 | 841 | 8448 | 2841 | 0.053 | 0.091 | 0.841 | 0.159 | 0.748 | 0.700 | 0.080 | 0.436 |
| DESeqNB    | 595 | 405 | 8884 | 2405 | 0.198 | 0.044 | 0.405 | 0.595 | 0.787 | 0.771 | 0.298 | 0.546 |
| DEsingle   | 517 | 483 | 8806 | 2483 | 0.172 | 0.052 | 0.483 | 0.517 | 0.780 | 0.759 | 0.259 | 0.512 |
| EBSeq      | 707 | 293 | 8996 | 2293 | 0.236 | 0.032 | 0.293 | 0.707 | 0.797 | 0.790 | 0.354 | 0.561 |
| edgeRQLF   | 755 | 245 | 9044 | 2245 | 0.252 | 0.026 | 0.245 | 0.755 | 0.801 | 0.797 | 0.378 | 0.585 |
| edgeRLRT   | 538 | 462 | 8827 | 2462 | 0.179 | 0.050 | 0.462 | 0.538 | 0.782 | 0.762 | 0.269 | 0.516 |
| EMDomics   | 486 | 514 | 8775 | 2514 | 0.162 | 0.055 | 0.514 | 0.486 | 0.777 | 0.754 | 0.243 | 0.503 |
| LIMMA      | 448 | 552 | 8737 | 2552 | 0.149 | 0.059 | 0.552 | 0.448 | 0.774 | 0.747 | 0.224 | 0.484 |
| MAST       | 618 | 382 | 8907 | 2382 | 0.206 | 0.041 | 0.382 | 0.618 | 0.789 | 0.775 | 0.309 | 0.537 |
| Monocle    | 537 | 463 | 8826 | 2463 | 0.179 | 0.050 | 0.463 | 0.537 | 0.782 | 0.762 | 0.269 | 0.506 |
| NBSeq      | 636 | 364 | 8925 | 2364 | 0.212 | 0.039 | 0.364 | 0.636 | 0.791 | 0.778 | 0.318 | 0.546 |
| NODES      | 383 | 617 | 8672 | 2617 | 0.128 | 0.066 | 0.617 | 0.383 | 0.768 | 0.737 | 0.192 | 0.485 |
| ROTS       | 308 | 692 | 8597 | 2692 | 0.103 | 0.074 | 0.692 | 0.308 | 0.762 | 0.725 | 0.154 | 0.464 |
| scDD       | 238 | 762 | 8527 | 2762 | 0.079 | 0.082 | 0.762 | 0.238 | 0.755 | 0.713 | 0.119 | 0.444 |
| T-test     | 532 | 468 | 8821 | 2468 | 0.177 | 0.050 | 0.468 | 0.532 | 0.781 | 0.761 | 0.266 | 0.509 |
| Wilcox     | 514 | 486 | 8803 | 2486 | 0.171 | 0.052 | 0.486 | 0.514 | 0.780 | 0.758 | 0.257 | 0.507 |
| DEG = 1500 |     |     |      |      |       |       |       |       |       |       |       |       |
| BPSC       | 672 | 828 | 8461 | 2328 | 0.224 | 0.089 | 0.552 | 0.448 | 0.784 | 0.743 | 0.299 | 0.537 |
| DECENT     | 969 | 531 | 8762 | 2031 | 0.323 | 0.057 | 0.354 | 0.646 | 0.812 | 0.792 | 0.431 | 0.653 |
| DEGSeq     | 721 | 779 | 8512 | 2279 | 0.240 | 0.084 | 0.519 | 0.481 | 0.789 | 0.751 | 0.320 | 0.525 |

|            |      |      |      |      |       |       |       |       |       |       |       |       |
|------------|------|------|------|------|-------|-------|-------|-------|-------|-------|-------|-------|
| DESeqLRT   | 214  | 1286 | 8003 | 2786 | 0.071 | 0.138 | 0.857 | 0.143 | 0.742 | 0.669 | 0.095 | 0.445 |
| DESeqNB    | 780  | 720  | 8569 | 2220 | 0.260 | 0.078 | 0.480 | 0.520 | 0.794 | 0.761 | 0.347 | 0.583 |
| DEsingle   | 694  | 806  | 8483 | 2306 | 0.231 | 0.087 | 0.537 | 0.463 | 0.786 | 0.747 | 0.308 | 0.548 |
| EBSeq      | 990  | 510  | 8779 | 2010 | 0.330 | 0.055 | 0.340 | 0.660 | 0.814 | 0.795 | 0.440 | 0.614 |
| edgeRQLF   | 971  | 529  | 8760 | 2029 | 0.324 | 0.057 | 0.353 | 0.647 | 0.812 | 0.792 | 0.432 | 0.642 |
| edgeRLRT   | 757  | 743  | 8546 | 2243 | 0.252 | 0.080 | 0.495 | 0.505 | 0.792 | 0.757 | 0.336 | 0.555 |
| EMDomics   | 673  | 827  | 8462 | 2327 | 0.224 | 0.089 | 0.551 | 0.449 | 0.784 | 0.743 | 0.299 | 0.537 |
| LIMMA      | 673  | 827  | 8462 | 2327 | 0.224 | 0.089 | 0.551 | 0.449 | 0.784 | 0.743 | 0.299 | 0.517 |
| MAST       | 836  | 664  | 8625 | 2164 | 0.279 | 0.071 | 0.443 | 0.557 | 0.799 | 0.770 | 0.372 | 0.583 |
| Monocle    | 764  | 736  | 8553 | 2236 | 0.255 | 0.079 | 0.491 | 0.509 | 0.793 | 0.758 | 0.340 | 0.547 |
| NBSeq      | 857  | 643  | 8646 | 2143 | 0.286 | 0.069 | 0.429 | 0.571 | 0.801 | 0.773 | 0.381 | 0.591 |
| NODES      | 559  | 941  | 8348 | 2441 | 0.186 | 0.101 | 0.627 | 0.373 | 0.774 | 0.725 | 0.248 | 0.510 |
| ROTS       | 449  | 1051 | 8238 | 2551 | 0.150 | 0.113 | 0.701 | 0.299 | 0.764 | 0.707 | 0.200 | 0.485 |
| scDD       | 365  | 1135 | 8154 | 2635 | 0.122 | 0.122 | 0.757 | 0.243 | 0.756 | 0.693 | 0.162 | 0.463 |
| T-test     | 734  | 766  | 8523 | 2266 | 0.245 | 0.082 | 0.511 | 0.489 | 0.790 | 0.753 | 0.326 | 0.549 |
| Wilcox     | 698  | 802  | 8487 | 2302 | 0.233 | 0.086 | 0.535 | 0.465 | 0.787 | 0.747 | 0.310 | 0.544 |
| DEG = 2000 |      |      |      |      |       |       |       |       |       |       |       |       |
| BPSC       | 847  | 1153 | 8136 | 2153 | 0.282 | 0.124 | 0.577 | 0.424 | 0.791 | 0.731 | 0.339 | 0.570 |
| DECENT     | 1127 | 873  | 8423 | 1873 | 0.376 | 0.094 | 0.437 | 0.564 | 0.818 | 0.777 | 0.451 | 0.692 |
| DEGSeq     | 907  | 1093 | 8202 | 2093 | 0.302 | 0.118 | 0.547 | 0.454 | 0.797 | 0.741 | 0.363 | 0.567 |
| DESeqLRT   | 276  | 1724 | 7565 | 2724 | 0.092 | 0.186 | 0.862 | 0.138 | 0.735 | 0.638 | 0.110 | 0.454 |
| DESeqNB    | 940  | 1060 | 8229 | 2060 | 0.313 | 0.114 | 0.530 | 0.470 | 0.800 | 0.746 | 0.376 | 0.617 |
| DEsingle   | 853  | 1147 | 8142 | 2147 | 0.284 | 0.123 | 0.574 | 0.427 | 0.791 | 0.732 | 0.341 | 0.580 |
| EBSeq      | 1261 | 739  | 8550 | 1739 | 0.420 | 0.080 | 0.370 | 0.631 | 0.831 | 0.798 | 0.504 | 0.664 |
| edgeRQLF   | 1171 | 829  | 8460 | 1829 | 0.390 | 0.089 | 0.415 | 0.586 | 0.822 | 0.784 | 0.468 | 0.684 |
| edgeRLRT   | 939  | 1061 | 8228 | 2061 | 0.313 | 0.114 | 0.531 | 0.470 | 0.800 | 0.746 | 0.376 | 0.593 |
| EMDomics   | 847  | 1153 | 8136 | 2153 | 0.282 | 0.124 | 0.577 | 0.424 | 0.791 | 0.731 | 0.339 | 0.569 |
| LIMMA      | 868  | 1132 | 8157 | 2132 | 0.289 | 0.122 | 0.566 | 0.434 | 0.793 | 0.734 | 0.347 | 0.555 |
| MAST       | 1018 | 982  | 8307 | 1982 | 0.339 | 0.106 | 0.491 | 0.509 | 0.807 | 0.759 | 0.407 | 0.624 |
| Monocle    | 970  | 1030 | 8259 | 2030 | 0.323 | 0.111 | 0.515 | 0.485 | 0.803 | 0.751 | 0.388 | 0.588 |
| NBSeq      | 1058 | 942  | 8347 | 1942 | 0.353 | 0.101 | 0.471 | 0.529 | 0.811 | 0.765 | 0.423 | 0.632 |
| NODES      | 743  | 1257 | 8032 | 2257 | 0.248 | 0.135 | 0.629 | 0.372 | 0.781 | 0.714 | 0.297 | 0.538 |
| ROTS       | 590  | 1410 | 7879 | 2410 | 0.197 | 0.152 | 0.705 | 0.295 | 0.766 | 0.689 | 0.236 | 0.507 |
| scDD       | 506  | 1494 | 7795 | 2494 | 0.169 | 0.161 | 0.747 | 0.253 | 0.758 | 0.675 | 0.202 | 0.482 |
| T-test     | 889  | 1111 | 8178 | 2111 | 0.296 | 0.120 | 0.556 | 0.445 | 0.795 | 0.738 | 0.356 | 0.586 |
| Wilcox     | 852  | 1148 | 8141 | 2148 | 0.284 | 0.124 | 0.574 | 0.426 | 0.791 | 0.732 | 0.341 | 0.579 |
| DEG = 2500 |      |      |      |      |       |       |       |       |       |       |       |       |
| BPSC       | 1035 | 1465 | 7824 | 1965 | 0.345 | 0.158 | 0.586 | 0.414 | 0.799 | 0.721 | 0.376 | 0.600 |
| DECENT     | 1257 | 1243 | 8068 | 1743 | 0.419 | 0.133 | 0.497 | 0.503 | 0.822 | 0.757 | 0.457 | 0.723 |
| DEGSeq     | 1093 | 1407 | 7903 | 1907 | 0.364 | 0.151 | 0.563 | 0.437 | 0.806 | 0.731 | 0.397 | 0.605 |
| DESeqLRT   | 342  | 2158 | 7131 | 2658 | 0.114 | 0.232 | 0.863 | 0.137 | 0.728 | 0.608 | 0.124 | 0.464 |
| DESeqNB    | 1093 | 1407 | 7882 | 1907 | 0.364 | 0.151 | 0.563 | 0.437 | 0.805 | 0.730 | 0.397 | 0.647 |
| DEsingle   | 1006 | 1494 | 7795 | 1994 | 0.335 | 0.161 | 0.598 | 0.402 | 0.796 | 0.716 | 0.366 | 0.611 |

|          |      |      |      |      |       |       |       |       |       |       |       |       |
|----------|------|------|------|------|-------|-------|-------|-------|-------|-------|-------|-------|
| EBSeq    | 1489 | 1011 | 8278 | 1511 | 0.496 | 0.109 | 0.404 | 0.596 | 0.846 | 0.795 | 0.541 | 0.715 |
| edgeRQLF | 1356 | 1144 | 8145 | 1644 | 0.452 | 0.123 | 0.458 | 0.542 | 0.832 | 0.773 | 0.493 | 0.722 |
| edgeRLRT | 1117 | 1383 | 7906 | 1883 | 0.372 | 0.149 | 0.553 | 0.447 | 0.808 | 0.734 | 0.406 | 0.627 |
| EMDomics | 1034 | 1466 | 7823 | 1966 | 0.345 | 0.158 | 0.586 | 0.414 | 0.799 | 0.721 | 0.376 | 0.600 |
| LIMMA    | 1065 | 1435 | 7854 | 1935 | 0.355 | 0.154 | 0.574 | 0.426 | 0.802 | 0.726 | 0.387 | 0.590 |
| MAST     | 1183 | 1317 | 7972 | 1817 | 0.394 | 0.142 | 0.527 | 0.473 | 0.814 | 0.745 | 0.430 | 0.661 |
| Monocle  | 1179 | 1321 | 7968 | 1821 | 0.393 | 0.142 | 0.528 | 0.472 | 0.814 | 0.744 | 0.429 | 0.625 |
| NBSeq    | 1266 | 1234 | 8055 | 1734 | 0.422 | 0.133 | 0.494 | 0.506 | 0.823 | 0.758 | 0.460 | 0.668 |
| NODES    | 927  | 1573 | 7716 | 2073 | 0.309 | 0.169 | 0.629 | 0.371 | 0.788 | 0.703 | 0.337 | 0.566 |
| ROTS     | 729  | 1771 | 7518 | 2271 | 0.243 | 0.191 | 0.708 | 0.292 | 0.768 | 0.671 | 0.265 | 0.530 |
| scDD     | 631  | 1869 | 7420 | 2369 | 0.210 | 0.201 | 0.748 | 0.252 | 0.758 | 0.655 | 0.229 | 0.503 |
| T-test   | 1083 | 1417 | 7872 | 1917 | 0.361 | 0.153 | 0.567 | 0.433 | 0.804 | 0.729 | 0.394 | 0.618 |
| Wilcox   | 1024 | 1476 | 7813 | 1976 | 0.341 | 0.159 | 0.590 | 0.410 | 0.798 | 0.719 | 0.372 | 0.609 |

DEG = 3000

|          |      |      |      |      |       |       |       |       |       |       |       |       |
|----------|------|------|------|------|-------|-------|-------|-------|-------|-------|-------|-------|
| BPSC     | 1220 | 1780 | 7509 | 1780 | 0.407 | 0.192 | 0.593 | 0.407 | 0.808 | 0.710 | 0.407 | 0.631 |
| DECENT   | 1415 | 1585 | 7744 | 1585 | 0.472 | 0.170 | 0.528 | 0.472 | 0.830 | 0.743 | 0.472 | 0.749 |
| DEGSeq   | 1284 | 1716 | 7606 | 1716 | 0.428 | 0.184 | 0.572 | 0.428 | 0.816 | 0.721 | 0.428 | 0.639 |
| DESeqLRT | 425  | 2575 | 6714 | 2575 | 0.142 | 0.277 | 0.858 | 0.142 | 0.723 | 0.581 | 0.142 | 0.474 |
| DESeqNB  | 1253 | 1747 | 7542 | 1747 | 0.418 | 0.188 | 0.582 | 0.418 | 0.812 | 0.716 | 0.418 | 0.676 |
| DEsingle | 1143 | 1857 | 7432 | 1857 | 0.381 | 0.200 | 0.619 | 0.381 | 0.800 | 0.698 | 0.381 | 0.640 |
| EBSeq    | 1719 | 1281 | 8008 | 1281 | 0.573 | 0.138 | 0.427 | 0.573 | 0.862 | 0.792 | 0.573 | 0.762 |
| edgeRQLF | 1525 | 1475 | 7814 | 1475 | 0.508 | 0.159 | 0.492 | 0.508 | 0.841 | 0.760 | 0.508 | 0.758 |
| edgeRLRT | 1320 | 1680 | 7609 | 1680 | 0.440 | 0.181 | 0.560 | 0.440 | 0.819 | 0.727 | 0.440 | 0.659 |
| EMDomics | 1182 | 1818 | 7471 | 1818 | 0.394 | 0.196 | 0.606 | 0.394 | 0.804 | 0.704 | 0.394 | 0.633 |
| LIMMA    | 1265 | 1735 | 7554 | 1735 | 0.422 | 0.187 | 0.578 | 0.422 | 0.813 | 0.718 | 0.422 | 0.624 |
| MAST     | 1324 | 1676 | 7613 | 1676 | 0.441 | 0.180 | 0.559 | 0.441 | 0.820 | 0.727 | 0.441 | 0.695 |
| Monocle  | 1362 | 1638 | 7651 | 1638 | 0.454 | 0.176 | 0.546 | 0.454 | 0.824 | 0.733 | 0.454 | 0.664 |
| NBSeq    | 1442 | 1558 | 7731 | 1558 | 0.481 | 0.168 | 0.519 | 0.481 | 0.832 | 0.746 | 0.481 | 0.706 |
| NODES    | 1106 | 1894 | 7395 | 1894 | 0.369 | 0.204 | 0.631 | 0.369 | 0.796 | 0.692 | 0.369 | 0.596 |
| ROTS     | 863  | 2137 | 7152 | 2137 | 0.288 | 0.230 | 0.712 | 0.288 | 0.770 | 0.652 | 0.288 | 0.553 |
| scDD     | 748  | 2252 | 7037 | 2252 | 0.249 | 0.242 | 0.751 | 0.249 | 0.758 | 0.633 | 0.249 | 0.525 |
| T-test   | 1276 | 1724 | 7565 | 1724 | 0.425 | 0.186 | 0.575 | 0.425 | 0.814 | 0.719 | 0.425 | 0.649 |
| Wilcox   | 1181 | 1819 | 7470 | 1819 | 0.394 | 0.196 | 0.606 | 0.394 | 0.804 | 0.704 | 0.394 | 0.639 |

TP: True Positives; FP: False Positives; TN: True Negatives; FN: False Negatives; TPR: True Positive Rate; FPR: False Positive Rate; FDR: False Discovery Rate; PPR: Positive Prediction Rate; NPV: Negative Prediction Value; ACC: Accuracy; F1: F1 score; AUROC: Area Under Receiver Operating Curve

**Table S15.** Evaluation of DE methods based on performance evaluation metrics for Soumillon3 scRNA-seq data.

| TP        | FP | TN | FN | TPR | FPR | FDR | PPR | NPV | ACC | F1 | AUROC |
|-----------|----|----|----|-----|-----|-----|-----|-----|-----|----|-------|
| DEG = 500 |    |    |    |     |     |     |     |     |     |    |       |

|            |     |     |       |      |       |       |       |       |       |       |       |       |
|------------|-----|-----|-------|------|-------|-------|-------|-------|-------|-------|-------|-------|
| BPSC       | 226 | 274 | 11740 | 2773 | 0.075 | 0.023 | 0.548 | 0.452 | 0.809 | 0.797 | 0.129 | 0.436 |
| DECENT     | 422 | 78  | 11936 | 2577 | 0.141 | 0.006 | 0.156 | 0.844 | 0.822 | 0.823 | 0.241 | 0.495 |
| DEGSeq     | 184 | 316 | 11698 | 2815 | 0.061 | 0.026 | 0.632 | 0.368 | 0.806 | 0.791 | 0.105 | 0.434 |
| DESeqLRT   | 160 | 340 | 11674 | 2839 | 0.053 | 0.028 | 0.680 | 0.320 | 0.804 | 0.788 | 0.091 | 0.430 |
| DESeqNB    | 290 | 210 | 11804 | 2709 | 0.097 | 0.017 | 0.420 | 0.580 | 0.813 | 0.806 | 0.166 | 0.456 |
| DEsingle   | 221 | 279 | 11735 | 2778 | 0.074 | 0.023 | 0.558 | 0.442 | 0.809 | 0.796 | 0.126 | 0.440 |
| EBSeq      | 215 | 285 | 11729 | 2784 | 0.072 | 0.024 | 0.570 | 0.430 | 0.808 | 0.796 | 0.123 | 0.439 |
| edgeRLRT   | 268 | 232 | 11782 | 2731 | 0.089 | 0.019 | 0.464 | 0.536 | 0.812 | 0.803 | 0.153 | 0.444 |
| edgeRQLF   | 363 | 137 | 11877 | 2636 | 0.121 | 0.011 | 0.274 | 0.726 | 0.818 | 0.815 | 0.207 | 0.471 |
| EMDomics   | 314 | 186 | 11828 | 2685 | 0.105 | 0.015 | 0.372 | 0.628 | 0.815 | 0.809 | 0.179 | 0.454 |
| LIMMA      | 238 | 262 | 11752 | 2761 | 0.079 | 0.022 | 0.524 | 0.476 | 0.810 | 0.799 | 0.136 | 0.429 |
| MAST       | 241 | 259 | 11755 | 2758 | 0.080 | 0.022 | 0.518 | 0.482 | 0.810 | 0.799 | 0.138 | 0.441 |
| Monocle    | 202 | 298 | 11716 | 2797 | 0.067 | 0.025 | 0.596 | 0.404 | 0.807 | 0.794 | 0.115 | 0.431 |
| NBSeq      | 254 | 246 | 11768 | 2745 | 0.085 | 0.020 | 0.492 | 0.508 | 0.811 | 0.801 | 0.145 | 0.445 |
| NODES      | 184 | 316 | 11698 | 2815 | 0.061 | 0.026 | 0.632 | 0.368 | 0.806 | 0.791 | 0.105 | 0.430 |
| ROTS       | 150 | 350 | 11664 | 2849 | 0.050 | 0.029 | 0.700 | 0.300 | 0.804 | 0.787 | 0.086 | 0.427 |
| scDD       | 84  | 416 | 11598 | 2915 | 0.028 | 0.035 | 0.832 | 0.168 | 0.799 | 0.778 | 0.048 | 0.413 |
| T-test     | 240 | 260 | 11754 | 2759 | 0.080 | 0.022 | 0.520 | 0.480 | 0.810 | 0.799 | 0.137 | 0.436 |
| Wilcox     | 240 | 260 | 11754 | 2759 | 0.080 | 0.022 | 0.520 | 0.480 | 0.810 | 0.799 | 0.137 | 0.440 |
| DEG = 1000 |     |     |       |      |       |       |       |       |       |       |       |       |
| BPSC       | 436 | 564 | 11450 | 2563 | 0.145 | 0.047 | 0.564 | 0.436 | 0.817 | 0.792 | 0.218 | 0.475 |
| DECENT     | 651 | 349 | 11665 | 2348 | 0.217 | 0.029 | 0.349 | 0.651 | 0.832 | 0.820 | 0.326 | 0.567 |
| DEGSeq     | 352 | 648 | 11366 | 2647 | 0.117 | 0.054 | 0.648 | 0.352 | 0.811 | 0.781 | 0.176 | 0.462 |
| DESeqLRT   | 306 | 694 | 11320 | 2693 | 0.102 | 0.058 | 0.694 | 0.306 | 0.808 | 0.774 | 0.153 | 0.455 |
| DESeqNB    | 498 | 502 | 11512 | 2501 | 0.166 | 0.042 | 0.502 | 0.498 | 0.822 | 0.800 | 0.249 | 0.501 |
| DEsingle   | 438 | 562 | 11452 | 2561 | 0.146 | 0.047 | 0.562 | 0.438 | 0.817 | 0.792 | 0.219 | 0.475 |
| EBSeq      | 434 | 566 | 11448 | 2565 | 0.145 | 0.047 | 0.566 | 0.434 | 0.817 | 0.791 | 0.217 | 0.474 |
| edgeRLRT   | 518 | 482 | 11532 | 2481 | 0.173 | 0.040 | 0.482 | 0.518 | 0.823 | 0.803 | 0.259 | 0.491 |
| edgeRQLF   | 602 | 398 | 11616 | 2397 | 0.201 | 0.033 | 0.398 | 0.602 | 0.829 | 0.814 | 0.301 | 0.534 |
| EMDomics   | 669 | 331 | 11683 | 2330 | 0.223 | 0.028 | 0.331 | 0.669 | 0.834 | 0.823 | 0.335 | 0.502 |
| LIMMA      | 597 | 403 | 11611 | 2402 | 0.199 | 0.034 | 0.403 | 0.597 | 0.829 | 0.813 | 0.299 | 0.469 |
| MAST       | 471 | 529 | 11485 | 2528 | 0.157 | 0.044 | 0.529 | 0.471 | 0.820 | 0.796 | 0.236 | 0.482 |
| Monocle    | 428 | 572 | 11442 | 2571 | 0.143 | 0.048 | 0.572 | 0.428 | 0.817 | 0.791 | 0.214 | 0.466 |
| NBSeq      | 488 | 512 | 11502 | 2511 | 0.163 | 0.043 | 0.512 | 0.488 | 0.821 | 0.799 | 0.244 | 0.486 |
| NODES      | 366 | 634 | 11380 | 2633 | 0.122 | 0.053 | 0.634 | 0.366 | 0.812 | 0.782 | 0.183 | 0.462 |
| ROTS       | 295 | 705 | 11309 | 2704 | 0.098 | 0.059 | 0.705 | 0.295 | 0.807 | 0.773 | 0.148 | 0.452 |
| scDD       | 176 | 824 | 11190 | 2823 | 0.059 | 0.069 | 0.824 | 0.176 | 0.799 | 0.757 | 0.088 | 0.429 |
| T-test     | 489 | 511 | 11503 | 2510 | 0.163 | 0.043 | 0.511 | 0.489 | 0.821 | 0.799 | 0.245 | 0.478 |
| Wilcox     | 483 | 517 | 11497 | 2516 | 0.161 | 0.043 | 0.517 | 0.483 | 0.820 | 0.798 | 0.242 | 0.483 |
| DEG = 1500 |     |     |       |      |       |       |       |       |       |       |       |       |
| BPSC       | 634 | 866 | 11148 | 2365 | 0.211 | 0.072 | 0.577 | 0.423 | 0.825 | 0.785 | 0.282 | 0.511 |
| DECENT     | 823 | 677 | 11337 | 2176 | 0.274 | 0.056 | 0.451 | 0.549 | 0.839 | 0.810 | 0.366 | 0.604 |
| DEGSeq     | 527 | 973 | 11041 | 2472 | 0.176 | 0.081 | 0.649 | 0.351 | 0.817 | 0.771 | 0.234 | 0.491 |



|            |      |      |       |      |       |       |       |       |       |       |       |       |
|------------|------|------|-------|------|-------|-------|-------|-------|-------|-------|-------|-------|
| DESeqLRT   | 433  | 1067 | 10947 | 2566 | 0.144 | 0.089 | 0.711 | 0.289 | 0.810 | 0.758 | 0.192 | 0.479 |
| DESeqNB    | 683  | 817  | 11197 | 2316 | 0.228 | 0.068 | 0.545 | 0.455 | 0.829 | 0.791 | 0.304 | 0.537 |
| DEsingle   | 631  | 869  | 11145 | 2368 | 0.210 | 0.072 | 0.579 | 0.421 | 0.825 | 0.784 | 0.281 | 0.512 |
| EBSeq      | 658  | 842  | 11172 | 2341 | 0.219 | 0.070 | 0.561 | 0.439 | 0.827 | 0.788 | 0.293 | 0.511 |
| edgeRLRT   | 726  | 774  | 11240 | 2273 | 0.242 | 0.064 | 0.516 | 0.484 | 0.832 | 0.797 | 0.323 | 0.536 |
| edgeQLF    | 768  | 732  | 11282 | 2231 | 0.256 | 0.061 | 0.488 | 0.512 | 0.835 | 0.803 | 0.341 | 0.577 |
| EMDomics   | 864  | 636  | 11378 | 2135 | 0.288 | 0.053 | 0.424 | 0.576 | 0.842 | 0.815 | 0.384 | 0.575 |
| LIMMA      | 876  | 624  | 11390 | 2123 | 0.292 | 0.052 | 0.416 | 0.584 | 0.843 | 0.817 | 0.389 | 0.536 |
| MAST       | 655  | 845  | 11169 | 2344 | 0.218 | 0.070 | 0.563 | 0.437 | 0.827 | 0.788 | 0.291 | 0.521 |
| Monocle    | 626  | 874  | 11140 | 2373 | 0.209 | 0.073 | 0.583 | 0.417 | 0.824 | 0.784 | 0.278 | 0.505 |
| NBSeq      | 667  | 833  | 11181 | 2332 | 0.222 | 0.069 | 0.555 | 0.445 | 0.827 | 0.789 | 0.297 | 0.528 |
| NODES      | 503  | 997  | 11017 | 2496 | 0.168 | 0.083 | 0.665 | 0.335 | 0.815 | 0.767 | 0.224 | 0.491 |
| ROTS       | 445  | 1055 | 10959 | 2554 | 0.148 | 0.088 | 0.703 | 0.297 | 0.811 | 0.760 | 0.198 | 0.476 |
| scDD       | 248  | 1252 | 10762 | 2751 | 0.083 | 0.104 | 0.835 | 0.165 | 0.796 | 0.733 | 0.110 | 0.443 |
| T-test     | 712  | 788  | 11226 | 2287 | 0.237 | 0.066 | 0.525 | 0.475 | 0.831 | 0.795 | 0.317 | 0.521 |
| Wilcox     | 679  | 821  | 11193 | 2320 | 0.226 | 0.068 | 0.547 | 0.453 | 0.828 | 0.791 | 0.302 | 0.524 |
| DEG = 2000 |      |      |       |      |       |       |       |       |       |       |       |       |
| BPSC       | 807  | 1193 | 10821 | 2192 | 0.269 | 0.099 | 0.597 | 0.404 | 0.832 | 0.775 | 0.323 | 0.547 |
| DECENT     | 996  | 1004 | 11010 | 2003 | 0.332 | 0.084 | 0.502 | 0.498 | 0.846 | 0.800 | 0.398 | 0.636 |
| DEGSeq     | 750  | 1250 | 10764 | 2249 | 0.250 | 0.104 | 0.625 | 0.375 | 0.827 | 0.767 | 0.300 | 0.517 |
| DESeqLRT   | 542  | 1458 | 10556 | 2457 | 0.181 | 0.121 | 0.729 | 0.271 | 0.811 | 0.739 | 0.217 | 0.501 |
| DESeqNB    | 846  | 1154 | 10860 | 2153 | 0.282 | 0.096 | 0.577 | 0.423 | 0.835 | 0.780 | 0.338 | 0.572 |
| DEsingle   | 793  | 1207 | 10807 | 2206 | 0.264 | 0.100 | 0.604 | 0.397 | 0.830 | 0.773 | 0.317 | 0.548 |
| EBSeq      | 866  | 1134 | 10880 | 2133 | 0.289 | 0.094 | 0.567 | 0.433 | 0.836 | 0.782 | 0.346 | 0.548 |
| edgeRLRT   | 925  | 1075 | 10939 | 2074 | 0.308 | 0.089 | 0.538 | 0.463 | 0.841 | 0.790 | 0.370 | 0.574 |
| edgeQLF    | 946  | 1054 | 10960 | 2053 | 0.315 | 0.088 | 0.527 | 0.473 | 0.842 | 0.793 | 0.378 | 0.610 |
| EMDomics   | 991  | 1009 | 11005 | 2008 | 0.330 | 0.084 | 0.505 | 0.496 | 0.846 | 0.799 | 0.396 | 0.624 |
| LIMMA      | 1018 | 982  | 11032 | 1981 | 0.339 | 0.082 | 0.491 | 0.509 | 0.848 | 0.803 | 0.407 | 0.602 |
| MAST       | 825  | 1175 | 10839 | 2174 | 0.275 | 0.098 | 0.588 | 0.413 | 0.833 | 0.777 | 0.330 | 0.556 |
| Monocle    | 813  | 1187 | 10827 | 2186 | 0.271 | 0.099 | 0.594 | 0.407 | 0.832 | 0.775 | 0.325 | 0.540 |
| NBSeq      | 850  | 1150 | 10864 | 2149 | 0.283 | 0.096 | 0.575 | 0.425 | 0.835 | 0.780 | 0.340 | 0.563 |
| NODES      | 636  | 1364 | 10650 | 2363 | 0.212 | 0.114 | 0.682 | 0.318 | 0.818 | 0.752 | 0.254 | 0.517 |
| ROTS       | 591  | 1409 | 10605 | 2408 | 0.197 | 0.117 | 0.705 | 0.296 | 0.815 | 0.746 | 0.236 | 0.501 |
| scDD       | 318  | 1682 | 10332 | 2681 | 0.106 | 0.140 | 0.841 | 0.159 | 0.794 | 0.709 | 0.127 | 0.456 |
| T-test     | 897  | 1103 | 10911 | 2102 | 0.299 | 0.092 | 0.552 | 0.449 | 0.838 | 0.787 | 0.359 | 0.564 |
| Wilcox     | 849  | 1151 | 10863 | 2150 | 0.283 | 0.096 | 0.576 | 0.425 | 0.835 | 0.780 | 0.340 | 0.562 |
| DEG = 2500 |      |      |       |      |       |       |       |       |       |       |       |       |
| BPSC       | 986  | 1514 | 10500 | 2013 | 0.329 | 0.126 | 0.606 | 0.394 | 0.839 | 0.765 | 0.359 | 0.579 |
| DECENT     | 1176 | 1324 | 10690 | 1823 | 0.392 | 0.110 | 0.530 | 0.470 | 0.854 | 0.790 | 0.428 | 0.666 |
| DEGSeq     | 916  | 1584 | 10430 | 2083 | 0.305 | 0.132 | 0.634 | 0.366 | 0.834 | 0.756 | 0.333 | 0.551 |
| DESeqLRT   | 640  | 1860 | 10154 | 2359 | 0.213 | 0.155 | 0.744 | 0.256 | 0.811 | 0.719 | 0.233 | 0.521 |
| DESeqNB    | 1005 | 1495 | 10519 | 1994 | 0.335 | 0.124 | 0.598 | 0.402 | 0.841 | 0.768 | 0.366 | 0.603 |
| DEsingle   | 936  | 1564 | 10450 | 2063 | 0.312 | 0.130 | 0.626 | 0.374 | 0.835 | 0.758 | 0.340 | 0.580 |

|          |      |      |       |      |       |       |       |       |       |       |       |       |
|----------|------|------|-------|------|-------|-------|-------|-------|-------|-------|-------|-------|
| EBSeq    | 1061 | 1439 | 10575 | 1938 | 0.354 | 0.120 | 0.576 | 0.424 | 0.845 | 0.775 | 0.386 | 0.585 |
| edgeRLRT | 1089 | 1411 | 10603 | 1910 | 0.363 | 0.117 | 0.564 | 0.436 | 0.847 | 0.779 | 0.396 | 0.613 |
| edgeRQLF | 1095 | 1405 | 10609 | 1904 | 0.365 | 0.117 | 0.562 | 0.438 | 0.848 | 0.780 | 0.398 | 0.643 |
| EMDomics | 1120 | 1380 | 10634 | 1879 | 0.373 | 0.115 | 0.552 | 0.448 | 0.850 | 0.783 | 0.407 | 0.658 |
| LIMMA    | 1117 | 1383 | 10631 | 1882 | 0.372 | 0.115 | 0.553 | 0.447 | 0.850 | 0.783 | 0.406 | 0.646 |
| MAST     | 974  | 1526 | 10488 | 2025 | 0.325 | 0.127 | 0.610 | 0.390 | 0.838 | 0.763 | 0.354 | 0.590 |
| Monocle  | 980  | 1520 | 10494 | 2019 | 0.327 | 0.127 | 0.608 | 0.392 | 0.839 | 0.764 | 0.356 | 0.575 |
| NBSeq    | 1019 | 1481 | 10533 | 1980 | 0.340 | 0.123 | 0.592 | 0.408 | 0.842 | 0.769 | 0.371 | 0.597 |
| NODES    | 796  | 1704 | 10310 | 2203 | 0.265 | 0.142 | 0.682 | 0.318 | 0.824 | 0.740 | 0.290 | 0.541 |
| ROTS     | 783  | 1717 | 10297 | 2216 | 0.261 | 0.143 | 0.687 | 0.313 | 0.823 | 0.738 | 0.285 | 0.523 |
| scDD     | 383  | 2117 | 9897  | 2616 | 0.128 | 0.176 | 0.847 | 0.153 | 0.791 | 0.685 | 0.139 | 0.469 |
| T-test   | 1073 | 1427 | 10587 | 1926 | 0.358 | 0.119 | 0.571 | 0.429 | 0.846 | 0.777 | 0.390 | 0.602 |
| Wilcox   | 1009 | 1491 | 10523 | 1990 | 0.336 | 0.124 | 0.596 | 0.404 | 0.841 | 0.768 | 0.367 | 0.596 |

DEG = 3000

|          |      |      |       |      |       |       |       |       |       |       |       |       |
|----------|------|------|-------|------|-------|-------|-------|-------|-------|-------|-------|-------|
| BPSC     | 1152 | 1848 | 10166 | 1847 | 0.384 | 0.154 | 0.616 | 0.384 | 0.846 | 0.754 | 0.384 | 0.611 |
| DECENT   | 1320 | 1680 | 10334 | 1679 | 0.440 | 0.140 | 0.560 | 0.440 | 0.860 | 0.776 | 0.440 | 0.699 |
| DEGSeq   | 1055 | 1945 | 10069 | 1944 | 0.352 | 0.162 | 0.648 | 0.352 | 0.838 | 0.741 | 0.352 | 0.585 |
| DESeqLRT | 723  | 2277 | 9737  | 2276 | 0.241 | 0.190 | 0.759 | 0.241 | 0.811 | 0.697 | 0.241 | 0.541 |
| DESeqNB  | 1155 | 1845 | 10169 | 1844 | 0.385 | 0.154 | 0.615 | 0.385 | 0.846 | 0.754 | 0.385 | 0.633 |
| DEsingle | 1065 | 1935 | 10079 | 1934 | 0.355 | 0.161 | 0.645 | 0.355 | 0.839 | 0.742 | 0.355 | 0.609 |
| EBSeq    | 1231 | 1769 | 10245 | 1768 | 0.410 | 0.147 | 0.590 | 0.410 | 0.853 | 0.764 | 0.410 | 0.623 |
| edgeRLRT | 1241 | 1759 | 10255 | 1758 | 0.414 | 0.146 | 0.586 | 0.414 | 0.854 | 0.766 | 0.414 | 0.648 |
| edgeRQLF | 1239 | 1761 | 10253 | 1760 | 0.413 | 0.147 | 0.587 | 0.413 | 0.853 | 0.765 | 0.413 | 0.673 |
| EMDomics | 1254 | 1746 | 10268 | 1745 | 0.418 | 0.145 | 0.582 | 0.418 | 0.855 | 0.767 | 0.418 | 0.687 |
| LIMMA    | 1218 | 1782 | 10232 | 1781 | 0.406 | 0.148 | 0.594 | 0.406 | 0.852 | 0.763 | 0.406 | 0.678 |
| MAST     | 1114 | 1886 | 10128 | 1885 | 0.371 | 0.157 | 0.629 | 0.371 | 0.843 | 0.749 | 0.371 | 0.620 |
| Monocle  | 1135 | 1865 | 10149 | 1864 | 0.378 | 0.155 | 0.622 | 0.378 | 0.845 | 0.752 | 0.378 | 0.608 |
| NBSeq    | 1173 | 1827 | 10187 | 1826 | 0.391 | 0.152 | 0.609 | 0.391 | 0.848 | 0.757 | 0.391 | 0.629 |
| NODES    | 931  | 2069 | 9945  | 2068 | 0.310 | 0.172 | 0.690 | 0.310 | 0.828 | 0.724 | 0.310 | 0.567 |
| ROTS     | 952  | 2048 | 9966  | 2047 | 0.317 | 0.170 | 0.683 | 0.317 | 0.830 | 0.727 | 0.317 | 0.551 |
| scDD     | 437  | 2563 | 9451  | 2562 | 0.146 | 0.213 | 0.854 | 0.146 | 0.787 | 0.659 | 0.146 | 0.481 |
| T-test   | 1241 | 1759 | 10255 | 1758 | 0.414 | 0.146 | 0.586 | 0.414 | 0.854 | 0.766 | 0.414 | 0.637 |
| Wilcox   | 1150 | 1850 | 10164 | 1849 | 0.383 | 0.154 | 0.617 | 0.383 | 0.846 | 0.754 | 0.383 | 0.628 |

TP: True Positives; FP: False Positives; TN: True Negatives; FN: False Negatives; TPR: True Positive Rate; FPR: False Positive Rate; FDR: False Discovery Rate; PPR: Positive Prediction Rate; NPV: Negative Prediction Value; ACC: Accuracy; F1: F1 score; AUROC: Area Under Receiver Operating Curve

**Table S16.** Evaluation of DE methods based on performance evaluation metrics for Klein scRNA-seq data.

| Methods | TP | FP | TN | FN | TPR | FPR | FDR | PPR | NPV | ACC | F1 | AUROC |
|---------|----|----|----|----|-----|-----|-----|-----|-----|-----|----|-------|
|---------|----|----|----|----|-----|-----|-----|-----|-----|-----|----|-------|

DEG = 500

|            |     |      |       |      |       |       |       |       |       |       |       |       |
|------------|-----|------|-------|------|-------|-------|-------|-------|-------|-------|-------|-------|
| BPSC       | 136 | 364  | 20605 | 2864 | 0.045 | 0.017 | 0.728 | 0.272 | 0.878 | 0.865 | 0.078 | 0.426 |
| DECENT     | 178 | 322  | 20647 | 2822 | 0.059 | 0.015 | 0.644 | 0.356 | 0.880 | 0.869 | 0.102 | 0.423 |
| DEGSeq     | 191 | 309  | 20660 | 2809 | 0.064 | 0.015 | 0.618 | 0.382 | 0.880 | 0.870 | 0.109 | 0.433 |
| DESeqLRT   | 155 | 345  | 20624 | 2845 | 0.052 | 0.016 | 0.690 | 0.310 | 0.879 | 0.867 | 0.089 | 0.434 |
| DESeqNB    | 177 | 323  | 20646 | 2823 | 0.059 | 0.015 | 0.646 | 0.354 | 0.880 | 0.869 | 0.101 | 0.435 |
| DEsingle   | 221 | 279  | 20690 | 2779 | 0.074 | 0.013 | 0.558 | 0.442 | 0.882 | 0.872 | 0.126 | 0.451 |
| EBSeq      | 110 | 390  | 20579 | 2890 | 0.037 | 0.019 | 0.780 | 0.220 | 0.877 | 0.863 | 0.063 | 0.418 |
| edgeRLRT   | 206 | 294  | 20675 | 2794 | 0.069 | 0.014 | 0.588 | 0.412 | 0.881 | 0.871 | 0.118 | 0.445 |
| edgeQLF    | 243 | 257  | 20712 | 2757 | 0.081 | 0.012 | 0.514 | 0.486 | 0.883 | 0.874 | 0.139 | 0.459 |
| EMDomics   | 302 | 198  | 20771 | 2698 | 0.101 | 0.009 | 0.396 | 0.604 | 0.885 | 0.879 | 0.173 | 0.473 |
| LIMMA      | 38  | 462  | 20509 | 2962 | 0.013 | 0.022 | 0.924 | 0.076 | 0.874 | 0.857 | 0.022 | 0.408 |
| MAST       | 77  | 423  | 20546 | 2923 | 0.026 | 0.020 | 0.846 | 0.154 | 0.875 | 0.860 | 0.044 | 0.406 |
| Monocle    | 134 | 366  | 20603 | 2866 | 0.045 | 0.017 | 0.732 | 0.268 | 0.878 | 0.865 | 0.077 | 0.413 |
| NBSeq      | 133 | 367  | 20602 | 2867 | 0.044 | 0.018 | 0.734 | 0.266 | 0.878 | 0.865 | 0.076 | 0.414 |
| NODES      | 59  | 441  | 20528 | 2941 | 0.020 | 0.021 | 0.882 | 0.118 | 0.875 | 0.859 | 0.034 | 0.410 |
| ROTS       | 109 | 391  | 20578 | 2891 | 0.036 | 0.019 | 0.782 | 0.218 | 0.877 | 0.863 | 0.062 | 0.418 |
| scDD       | 0   | 500  | 20469 | 3000 | 0.000 | 0.024 | 1.000 | 0.000 | 0.872 | 0.854 | 0.000 | 0.400 |
| T-test     | 163 | 337  | 20632 | 2837 | 0.054 | 0.016 | 0.674 | 0.326 | 0.879 | 0.868 | 0.093 | 0.431 |
| Wilcox     | 226 | 274  | 20695 | 2774 | 0.075 | 0.013 | 0.548 | 0.452 | 0.882 | 0.873 | 0.129 | 0.453 |
| DEG = 1000 |     |      |       |      |       |       |       |       |       |       |       |       |
| BPSC       | 205 | 795  | 20174 | 2795 | 0.068 | 0.038 | 0.795 | 0.205 | 0.878 | 0.850 | 0.103 | 0.444 |
| DECENT     | 326 | 674  | 20295 | 2674 | 0.109 | 0.032 | 0.674 | 0.326 | 0.884 | 0.860 | 0.163 | 0.456 |
| DEGSeq     | 294 | 706  | 20263 | 2706 | 0.098 | 0.034 | 0.706 | 0.294 | 0.882 | 0.858 | 0.147 | 0.461 |
| DESeqLRT   | 226 | 774  | 20195 | 2774 | 0.075 | 0.037 | 0.774 | 0.226 | 0.879 | 0.852 | 0.113 | 0.451 |
| DESeqNB    | 276 | 724  | 20245 | 2724 | 0.092 | 0.035 | 0.724 | 0.276 | 0.881 | 0.856 | 0.138 | 0.458 |
| DEsingle   | 306 | 694  | 20275 | 2694 | 0.102 | 0.033 | 0.694 | 0.306 | 0.883 | 0.859 | 0.153 | 0.474 |
| EBSeq      | 234 | 766  | 20203 | 2766 | 0.078 | 0.037 | 0.766 | 0.234 | 0.880 | 0.853 | 0.117 | 0.435 |
| edgeRLRT   | 287 | 713  | 20256 | 2713 | 0.096 | 0.034 | 0.713 | 0.287 | 0.882 | 0.857 | 0.144 | 0.468 |
| edgeQLF    | 321 | 679  | 20290 | 2679 | 0.107 | 0.032 | 0.679 | 0.321 | 0.883 | 0.860 | 0.161 | 0.481 |
| EMDomics   | 453 | 547  | 20422 | 2547 | 0.151 | 0.026 | 0.547 | 0.453 | 0.889 | 0.871 | 0.227 | 0.517 |
| LIMMA      | 85  | 915  | 20057 | 2915 | 0.028 | 0.044 | 0.915 | 0.085 | 0.873 | 0.840 | 0.043 | 0.413 |
| MAST       | 255 | 745  | 20224 | 2745 | 0.085 | 0.036 | 0.745 | 0.255 | 0.880 | 0.854 | 0.128 | 0.427 |
| Monocle    | 283 | 717  | 20252 | 2717 | 0.094 | 0.034 | 0.717 | 0.283 | 0.882 | 0.857 | 0.142 | 0.442 |
| NBSeq      | 283 | 717  | 20252 | 2717 | 0.094 | 0.034 | 0.717 | 0.283 | 0.882 | 0.857 | 0.142 | 0.442 |
| NODES      | 105 | 895  | 20074 | 2895 | 0.035 | 0.043 | 0.895 | 0.105 | 0.874 | 0.842 | 0.053 | 0.419 |
| ROTS       | 214 | 786  | 20183 | 2786 | 0.071 | 0.037 | 0.786 | 0.214 | 0.879 | 0.851 | 0.107 | 0.433 |
| scDD       | 0   | 1000 | 19969 | 3000 | 0.000 | 0.048 | 1.000 | 0.000 | 0.869 | 0.833 | 0.000 | 0.400 |
| T-test     | 254 | 746  | 20223 | 2746 | 0.085 | 0.036 | 0.746 | 0.254 | 0.880 | 0.854 | 0.127 | 0.453 |
| Wilcox     | 309 | 691  | 20278 | 2691 | 0.103 | 0.033 | 0.691 | 0.309 | 0.883 | 0.859 | 0.155 | 0.475 |
| DEG = 1500 |     |      |       |      |       |       |       |       |       |       |       |       |
| BPSC       | 260 | 1240 | 19729 | 2740 | 0.087 | 0.059 | 0.827 | 0.173 | 0.878 | 0.834 | 0.116 | 0.456 |
| DECENT     | 438 | 1062 | 19907 | 2562 | 0.146 | 0.051 | 0.708 | 0.292 | 0.886 | 0.849 | 0.195 | 0.483 |
| DEGSeq     | 402 | 1098 | 19871 | 2598 | 0.134 | 0.052 | 0.732 | 0.268 | 0.884 | 0.846 | 0.179 | 0.481 |

|            |     |      |       |      |       |       |       |       |       |       |       |       |
|------------|-----|------|-------|------|-------|-------|-------|-------|-------|-------|-------|-------|
| DESeqLRT   | 263 | 1237 | 19732 | 2737 | 0.088 | 0.059 | 0.825 | 0.175 | 0.878 | 0.834 | 0.117 | 0.463 |
| DESeqNB    | 344 | 1156 | 19813 | 2656 | 0.115 | 0.055 | 0.771 | 0.229 | 0.882 | 0.841 | 0.153 | 0.475 |
| DEsingle   | 371 | 1129 | 19840 | 2629 | 0.124 | 0.054 | 0.753 | 0.247 | 0.883 | 0.843 | 0.165 | 0.489 |
| EBSeq      | 317 | 1183 | 19786 | 2683 | 0.106 | 0.056 | 0.789 | 0.211 | 0.881 | 0.839 | 0.141 | 0.456 |
| edgeRLRT   | 347 | 1153 | 19816 | 2653 | 0.116 | 0.055 | 0.769 | 0.231 | 0.882 | 0.841 | 0.154 | 0.483 |
| edgeRQLF   | 379 | 1121 | 19848 | 2621 | 0.126 | 0.053 | 0.747 | 0.253 | 0.883 | 0.844 | 0.168 | 0.495 |
| EMDomics   | 511 | 989  | 19980 | 2489 | 0.170 | 0.047 | 0.659 | 0.341 | 0.889 | 0.855 | 0.227 | 0.537 |
| LIMMA      | 123 | 1377 | 19597 | 2877 | 0.041 | 0.066 | 0.918 | 0.082 | 0.872 | 0.823 | 0.055 | 0.419 |
| MAST       | 431 | 1069 | 19900 | 2569 | 0.144 | 0.051 | 0.713 | 0.287 | 0.886 | 0.848 | 0.192 | 0.454 |
| Monocle    | 381 | 1119 | 19850 | 2619 | 0.127 | 0.053 | 0.746 | 0.254 | 0.883 | 0.844 | 0.169 | 0.467 |
| NBSeq      | 386 | 1114 | 19855 | 2614 | 0.129 | 0.053 | 0.743 | 0.257 | 0.884 | 0.844 | 0.172 | 0.467 |
| NODES      | 146 | 1354 | 19615 | 2854 | 0.049 | 0.065 | 0.903 | 0.097 | 0.873 | 0.824 | 0.065 | 0.426 |
| ROTS       | 320 | 1180 | 19789 | 2680 | 0.107 | 0.056 | 0.787 | 0.213 | 0.881 | 0.839 | 0.142 | 0.453 |
| scDD       | 0   | 1500 | 19469 | 3000 | 0.000 | 0.072 | 1.000 | 0.000 | 0.866 | 0.812 | 0.000 | 0.400 |
| T-test     | 312 | 1188 | 19781 | 2688 | 0.104 | 0.057 | 0.792 | 0.208 | 0.880 | 0.838 | 0.139 | 0.469 |
| Wilcox     | 370 | 1130 | 19839 | 2630 | 0.123 | 0.054 | 0.753 | 0.247 | 0.883 | 0.843 | 0.164 | 0.490 |
| DEG = 2000 |     |      |       |      |       |       |       |       |       |       |       |       |
| BPSC       | 299 | 1701 | 19268 | 2701 | 0.100 | 0.081 | 0.851 | 0.150 | 0.877 | 0.816 | 0.120 | 0.466 |
| DECENT     | 532 | 1468 | 19501 | 2468 | 0.177 | 0.070 | 0.734 | 0.266 | 0.888 | 0.836 | 0.213 | 0.505 |
| DEGSeq     | 503 | 1497 | 19472 | 2497 | 0.168 | 0.071 | 0.749 | 0.252 | 0.886 | 0.833 | 0.201 | 0.500 |
| DESeqLRT   | 294 | 1706 | 19263 | 2706 | 0.098 | 0.081 | 0.853 | 0.147 | 0.877 | 0.816 | 0.118 | 0.471 |
| DESeqNB    | 424 | 1576 | 19393 | 2576 | 0.141 | 0.075 | 0.788 | 0.212 | 0.883 | 0.827 | 0.170 | 0.489 |
| DEsingle   | 440 | 1560 | 19409 | 2560 | 0.147 | 0.074 | 0.780 | 0.220 | 0.883 | 0.828 | 0.176 | 0.502 |
| EBSeq      | 390 | 1610 | 19359 | 2610 | 0.130 | 0.077 | 0.805 | 0.195 | 0.881 | 0.824 | 0.156 | 0.472 |
| edgeRLRT   | 423 | 1577 | 19392 | 2577 | 0.141 | 0.075 | 0.789 | 0.212 | 0.883 | 0.827 | 0.169 | 0.495 |
| edgeRQLF   | 443 | 1557 | 19412 | 2557 | 0.148 | 0.074 | 0.779 | 0.222 | 0.884 | 0.828 | 0.177 | 0.507 |
| EMDomics   | 770 | 1230 | 19739 | 2230 | 0.257 | 0.059 | 0.615 | 0.385 | 0.898 | 0.856 | 0.308 | 0.549 |
| LIMMA      | 200 | 1800 | 19174 | 2800 | 0.067 | 0.086 | 0.900 | 0.100 | 0.873 | 0.808 | 0.080 | 0.428 |
| MAST       | 591 | 1409 | 19560 | 2409 | 0.197 | 0.067 | 0.705 | 0.296 | 0.890 | 0.841 | 0.236 | 0.482 |
| Monocle    | 473 | 1527 | 19442 | 2527 | 0.158 | 0.073 | 0.764 | 0.237 | 0.885 | 0.831 | 0.189 | 0.487 |
| NBSeq      | 493 | 1507 | 19462 | 2507 | 0.164 | 0.072 | 0.754 | 0.247 | 0.886 | 0.833 | 0.197 | 0.488 |
| NODES      | 173 | 1827 | 19142 | 2827 | 0.058 | 0.087 | 0.914 | 0.087 | 0.871 | 0.806 | 0.069 | 0.434 |
| ROTS       | 387 | 1613 | 19356 | 2613 | 0.129 | 0.077 | 0.807 | 0.194 | 0.881 | 0.824 | 0.155 | 0.471 |
| scDD       | 0   | 2000 | 18969 | 3000 | 0.000 | 0.095 | 1.000 | 0.000 | 0.863 | 0.791 | 0.000 | 0.400 |
| T-test     | 390 | 1610 | 19359 | 2610 | 0.130 | 0.077 | 0.805 | 0.195 | 0.881 | 0.824 | 0.156 | 0.481 |
| Wilcox     | 435 | 1565 | 19404 | 2565 | 0.145 | 0.075 | 0.783 | 0.218 | 0.883 | 0.828 | 0.174 | 0.503 |
| DEG = 2500 |     |      |       |      |       |       |       |       |       |       |       |       |
| BPSC       | 327 | 2173 | 18796 | 2673 | 0.109 | 0.104 | 0.869 | 0.131 | 0.875 | 0.798 | 0.119 | 0.474 |
| DECENT     | 617 | 1883 | 19086 | 2383 | 0.206 | 0.090 | 0.753 | 0.247 | 0.889 | 0.822 | 0.224 | 0.524 |
| DEGSeq     | 589 | 1911 | 19058 | 2411 | 0.196 | 0.091 | 0.764 | 0.236 | 0.888 | 0.820 | 0.214 | 0.518 |
| DESeqLRT   | 323 | 2177 | 18792 | 2677 | 0.108 | 0.104 | 0.871 | 0.129 | 0.875 | 0.797 | 0.117 | 0.478 |
| DESeqNB    | 488 | 2012 | 18957 | 2512 | 0.163 | 0.096 | 0.805 | 0.195 | 0.883 | 0.811 | 0.177 | 0.503 |
| DEsingle   | 496 | 2004 | 18965 | 2504 | 0.165 | 0.096 | 0.802 | 0.198 | 0.883 | 0.812 | 0.180 | 0.514 |

|          |      |      |       |      |       |       |       |       |       |       |       |       |
|----------|------|------|-------|------|-------|-------|-------|-------|-------|-------|-------|-------|
| EBSeq    | 474  | 2026 | 18943 | 2526 | 0.158 | 0.097 | 0.810 | 0.190 | 0.882 | 0.810 | 0.172 | 0.487 |
| edgeRLRT | 488  | 2012 | 18957 | 2512 | 0.163 | 0.096 | 0.805 | 0.195 | 0.883 | 0.811 | 0.177 | 0.507 |
| edgeRQLF | 502  | 1998 | 18971 | 2498 | 0.167 | 0.095 | 0.799 | 0.201 | 0.884 | 0.812 | 0.183 | 0.518 |
| EMDomics | 1039 | 1461 | 19508 | 1961 | 0.346 | 0.070 | 0.584 | 0.416 | 0.909 | 0.857 | 0.378 | 0.574 |
| LIMMA    | 354  | 2146 | 18828 | 2646 | 0.118 | 0.102 | 0.858 | 0.142 | 0.877 | 0.800 | 0.129 | 0.439 |
| MAST     | 750  | 1750 | 19219 | 2250 | 0.250 | 0.083 | 0.700 | 0.300 | 0.895 | 0.833 | 0.273 | 0.510 |
| Monocle  | 553  | 1947 | 19022 | 2447 | 0.184 | 0.093 | 0.779 | 0.221 | 0.886 | 0.817 | 0.201 | 0.505 |
| NBSeq    | 589  | 1911 | 19058 | 2411 | 0.196 | 0.091 | 0.764 | 0.236 | 0.888 | 0.820 | 0.214 | 0.508 |
| NODES    | 199  | 2301 | 18668 | 2801 | 0.066 | 0.110 | 0.920 | 0.080 | 0.870 | 0.787 | 0.072 | 0.439 |
| ROTS     | 438  | 2062 | 18907 | 2562 | 0.146 | 0.098 | 0.825 | 0.175 | 0.881 | 0.807 | 0.159 | 0.485 |
| scDD     | 0    | 2500 | 18469 | 3000 | 0.000 | 0.119 | 1.000 | 0.000 | 0.860 | 0.771 | 0.000 | 0.400 |
| T-test   | 469  | 2031 | 18938 | 2531 | 0.156 | 0.097 | 0.812 | 0.188 | 0.882 | 0.810 | 0.171 | 0.494 |
| Wilcox   | 499  | 2001 | 18968 | 2501 | 0.166 | 0.095 | 0.800 | 0.200 | 0.884 | 0.812 | 0.181 | 0.514 |

DEG = 3000

|          |      |      |       |      |       |       |       |       |       |       |       |       |
|----------|------|------|-------|------|-------|-------|-------|-------|-------|-------|-------|-------|
| BPSC     | 365  | 2635 | 18334 | 2635 | 0.122 | 0.126 | 0.878 | 0.122 | 0.874 | 0.780 | 0.122 | 0.482 |
| DECENT   | 704  | 2296 | 18673 | 2296 | 0.235 | 0.109 | 0.765 | 0.235 | 0.891 | 0.808 | 0.235 | 0.542 |
| DEGSeq   | 719  | 2281 | 18688 | 2281 | 0.240 | 0.109 | 0.760 | 0.240 | 0.891 | 0.810 | 0.240 | 0.533 |
| DESeqLRT | 350  | 2650 | 18319 | 2650 | 0.117 | 0.126 | 0.883 | 0.117 | 0.874 | 0.779 | 0.117 | 0.484 |
| DESeqNB  | 542  | 2458 | 18511 | 2458 | 0.181 | 0.117 | 0.819 | 0.181 | 0.883 | 0.795 | 0.181 | 0.516 |
| DEsingle | 552  | 2448 | 18521 | 2448 | 0.184 | 0.117 | 0.816 | 0.184 | 0.883 | 0.796 | 0.184 | 0.525 |
| EBSeq    | 543  | 2457 | 18512 | 2457 | 0.181 | 0.117 | 0.819 | 0.181 | 0.883 | 0.795 | 0.181 | 0.501 |
| edgeRLRT | 545  | 2455 | 18514 | 2455 | 0.182 | 0.117 | 0.818 | 0.182 | 0.883 | 0.795 | 0.182 | 0.519 |
| edgeRQLF | 551  | 2449 | 18520 | 2449 | 0.184 | 0.117 | 0.816 | 0.184 | 0.883 | 0.796 | 0.184 | 0.529 |
| EMDomics | 1460 | 1540 | 19429 | 1540 | 0.487 | 0.073 | 0.513 | 0.487 | 0.927 | 0.872 | 0.487 | 0.586 |
| LIMMA    | 492  | 2508 | 18466 | 2508 | 0.164 | 0.120 | 0.836 | 0.164 | 0.880 | 0.791 | 0.164 | 0.453 |
| MAST     | 905  | 2095 | 18874 | 2095 | 0.302 | 0.100 | 0.698 | 0.302 | 0.900 | 0.825 | 0.302 | 0.537 |
| Monocle  | 632  | 2368 | 18601 | 2368 | 0.211 | 0.113 | 0.789 | 0.211 | 0.887 | 0.802 | 0.211 | 0.521 |
| NBSeq    | 689  | 2311 | 18658 | 2311 | 0.230 | 0.110 | 0.770 | 0.230 | 0.890 | 0.807 | 0.230 | 0.527 |
| NODES    | 217  | 2783 | 18186 | 2783 | 0.072 | 0.133 | 0.928 | 0.072 | 0.867 | 0.768 | 0.072 | 0.445 |
| ROTS     | 489  | 2511 | 18458 | 2511 | 0.163 | 0.120 | 0.837 | 0.163 | 0.880 | 0.790 | 0.163 | 0.497 |
| scDD     | 0    | 3000 | 17969 | 3000 | 0.000 | 0.143 | 1.000 | 0.000 | 0.857 | 0.750 | 0.000 | 0.400 |
| T-test   | 539  | 2461 | 18508 | 2461 | 0.180 | 0.117 | 0.820 | 0.180 | 0.883 | 0.795 | 0.180 | 0.507 |
| Wilcox   | 546  | 2454 | 18515 | 2454 | 0.182 | 0.117 | 0.818 | 0.182 | 0.883 | 0.795 | 0.182 | 0.525 |

TP: True Positives; FP: False Positives; TN: True Negatives; FN: False Negatives; TPR: True Positive Rate; FPR: False Positive Rate; FDR: False Discovery Rate; PPR: Positive Prediction Rate; NPV: Negative Prediction Value; ACC: Accuracy; F1: F1 score; AUROC: Area Under Receiver Operating Curve

**Table S17.** Evaluation of DE methods based on performance evaluation metrics for Gierahn scRNA-seq data.

|           | TP | FP | TN | FN | TPR | FPR | FDR | PPR | NPV | ACC | F1 | AUROC |
|-----------|----|----|----|----|-----|-----|-----|-----|-----|-----|----|-------|
| DEG = 500 |    |    |    |    |     |     |     |     |     |     |    |       |

|            |     |      |       |      |       |       |       |       |       |       |       |       |
|------------|-----|------|-------|------|-------|-------|-------|-------|-------|-------|-------|-------|
| BPSC       | 1   | 498  | 12498 | 2999 | 0.001 | 0.038 | 0.998 | 0.002 | 0.806 | 0.781 | 0.001 | 0.400 |
| DECENT     | 294 | 206  | 12790 | 2706 | 0.098 | 0.016 | 0.412 | 0.588 | 0.825 | 0.818 | 0.168 | 0.455 |
| DEGSeq     | 191 | 308  | 12688 | 2809 | 0.064 | 0.024 | 0.617 | 0.383 | 0.819 | 0.805 | 0.109 | 0.426 |
| DESeqLRT   | 45  | 455  | 12541 | 2955 | 0.015 | 0.035 | 0.910 | 0.090 | 0.809 | 0.787 | 0.026 | 0.411 |
| DESeqNB    | 139 | 361  | 12635 | 2861 | 0.046 | 0.028 | 0.722 | 0.278 | 0.815 | 0.799 | 0.079 | 0.424 |
| DESingle   | 2   | 492  | 12504 | 3000 | 0.000 | 0.038 | 1.000 | 0.000 | 0.807 | 0.782 | 0.000 | 0.400 |
| EBSeq      | 468 | 32   | 12964 | 2532 | 0.156 | 0.002 | 0.064 | 0.936 | 0.837 | 0.840 | 0.267 | 0.494 |
| edgeRLRT   | 5   | 495  | 12501 | 2995 | 0.002 | 0.038 | 0.990 | 0.010 | 0.807 | 0.782 | 0.003 | 0.401 |
| edgeQLF    | 5   | 495  | 12501 | 2995 | 0.002 | 0.038 | 0.990 | 0.010 | 0.807 | 0.782 | 0.003 | 0.401 |
| EMDomics   | 140 | 356  | 12640 | 2860 | 0.047 | 0.027 | 0.718 | 0.282 | 0.815 | 0.799 | 0.080 | 0.424 |
| LIMMA      | 226 | 274  | 12722 | 2774 | 0.075 | 0.021 | 0.548 | 0.452 | 0.821 | 0.809 | 0.129 | 0.434 |
| MAST       | 13  | 487  | 12509 | 2987 | 0.004 | 0.037 | 0.974 | 0.026 | 0.807 | 0.783 | 0.007 | 0.403 |
| Monocle    | 274 | 225  | 12771 | 2726 | 0.091 | 0.017 | 0.451 | 0.549 | 0.824 | 0.816 | 0.157 | 0.439 |
| NBSeq      | 148 | 352  | 12644 | 2852 | 0.049 | 0.027 | 0.704 | 0.296 | 0.816 | 0.800 | 0.085 | 0.427 |
| NODES      | 22  | 478  | 12518 | 2978 | 0.007 | 0.037 | 0.956 | 0.044 | 0.808 | 0.784 | 0.013 | 0.404 |
| ROTS       | 4   | 496  | 12500 | 2996 | 0.001 | 0.038 | 0.992 | 0.008 | 0.807 | 0.782 | 0.002 | 0.401 |
| scDD       | 29  | 471  | 12525 | 2971 | 0.010 | 0.036 | 0.942 | 0.058 | 0.808 | 0.785 | 0.017 | 0.404 |
| T-test     | 4   | 496  | 12500 | 2996 | 0.001 | 0.038 | 0.992 | 0.008 | 0.807 | 0.782 | 0.002 | 0.401 |
| Wilcox     | 4   | 496  | 12500 | 2996 | 0.001 | 0.038 | 0.992 | 0.008 | 0.807 | 0.782 | 0.002 | 0.401 |
| DEG = 1000 |     |      |       |      |       |       |       |       |       |       |       |       |
| BPSC       | 1   | 998  | 11998 | 2999 | 0.000 | 0.077 | 0.999 | 0.001 | 0.800 | 0.750 | 0.001 | 0.400 |
| DECENT     | 579 | 421  | 12575 | 2421 | 0.193 | 0.032 | 0.421 | 0.579 | 0.839 | 0.822 | 0.290 | 0.504 |
| DEGSeq     | 421 | 578  | 12418 | 2579 | 0.140 | 0.044 | 0.579 | 0.421 | 0.828 | 0.803 | 0.211 | 0.461 |
| DESeqLRT   | 55  | 945  | 12051 | 2945 | 0.018 | 0.073 | 0.945 | 0.055 | 0.804 | 0.757 | 0.028 | 0.414 |
| DESeqNB    | 224 | 776  | 12220 | 2776 | 0.075 | 0.060 | 0.776 | 0.224 | 0.815 | 0.778 | 0.112 | 0.443 |
| DESingle   | 3   | 992  | 12004 | 3000 | 0.000 | 0.076 | 1.000 | 0.000 | 0.800 | 0.750 | 0.000 | 0.400 |
| EBSeq      | 864 | 136  | 12860 | 2136 | 0.288 | 0.010 | 0.136 | 0.864 | 0.858 | 0.858 | 0.432 | 0.595 |
| edgeRLRT   | 5   | 995  | 12001 | 2995 | 0.002 | 0.077 | 0.995 | 0.005 | 0.800 | 0.751 | 0.003 | 0.401 |
| edgeQLF    | 6   | 994  | 12002 | 2994 | 0.002 | 0.076 | 0.994 | 0.006 | 0.800 | 0.751 | 0.003 | 0.402 |
| EMDomics   | 224 | 771  | 12225 | 2776 | 0.075 | 0.059 | 0.775 | 0.225 | 0.815 | 0.778 | 0.112 | 0.443 |
| LIMMA      | 435 | 565  | 12431 | 2565 | 0.145 | 0.043 | 0.565 | 0.435 | 0.829 | 0.804 | 0.218 | 0.473 |
| MAST       | 16  | 984  | 12012 | 2984 | 0.005 | 0.076 | 0.984 | 0.016 | 0.801 | 0.752 | 0.008 | 0.404 |
| Monocle    | 551 | 445  | 12551 | 2449 | 0.184 | 0.034 | 0.447 | 0.553 | 0.837 | 0.819 | 0.276 | 0.489 |
| NBSeq      | 228 | 772  | 12224 | 2772 | 0.076 | 0.059 | 0.772 | 0.228 | 0.815 | 0.778 | 0.114 | 0.445 |
| NODES      | 41  | 959  | 12037 | 2959 | 0.014 | 0.074 | 0.959 | 0.041 | 0.803 | 0.755 | 0.021 | 0.407 |
| ROTS       | 4   | 996  | 12000 | 2996 | 0.001 | 0.077 | 0.996 | 0.004 | 0.800 | 0.750 | 0.002 | 0.401 |
| scDD       | 52  | 948  | 12048 | 2948 | 0.017 | 0.073 | 0.948 | 0.052 | 0.803 | 0.756 | 0.026 | 0.409 |
| T-test     | 5   | 995  | 12001 | 2995 | 0.002 | 0.077 | 0.995 | 0.005 | 0.800 | 0.751 | 0.003 | 0.401 |
| Wilcox     | 4   | 996  | 12000 | 2996 | 0.001 | 0.077 | 0.996 | 0.004 | 0.800 | 0.750 | 0.002 | 0.401 |
| DEG = 1500 |     |      |       |      |       |       |       |       |       |       |       |       |
| BPSC       | 1   | 1497 | 11499 | 2999 | 0.000 | 0.115 | 0.999 | 0.001 | 0.793 | 0.719 | 0.000 | 0.400 |
| DECENT     | 846 | 654  | 12342 | 2154 | 0.282 | 0.050 | 0.436 | 0.564 | 0.851 | 0.824 | 0.376 | 0.550 |
| DEGSeq     | 629 | 868  | 12128 | 2371 | 0.210 | 0.067 | 0.580 | 0.420 | 0.836 | 0.798 | 0.280 | 0.499 |

|            |      |      |       |      |       |       |       |       |       |       |       |       |
|------------|------|------|-------|------|-------|-------|-------|-------|-------|-------|-------|-------|
| DESeqLRT   | 61   | 1439 | 11557 | 2939 | 0.020 | 0.111 | 0.959 | 0.041 | 0.797 | 0.726 | 0.027 | 0.416 |
| DESeqNB    | 312  | 1188 | 11808 | 2688 | 0.104 | 0.091 | 0.792 | 0.208 | 0.815 | 0.758 | 0.139 | 0.459 |
| DESingle   | 0    | 1492 | 11504 | 3000 | 0.000 | 0.115 | 1.000 | 0.000 | 0.793 | 0.719 | 0.000 | 0.400 |
| EBSeq      | 1205 | 295  | 12701 | 1795 | 0.402 | 0.023 | 0.197 | 0.803 | 0.876 | 0.869 | 0.536 | 0.678 |
| edgeRLRT   | 5    | 1495 | 11501 | 2995 | 0.002 | 0.115 | 0.997 | 0.003 | 0.793 | 0.719 | 0.002 | 0.402 |
| edgeRQLF   | 6    | 1494 | 11502 | 2994 | 0.002 | 0.115 | 0.996 | 0.004 | 0.793 | 0.719 | 0.003 | 0.402 |
| EMDomics   | 312  | 1183 | 11813 | 2688 | 0.104 | 0.091 | 0.791 | 0.209 | 0.815 | 0.758 | 0.139 | 0.459 |
| LIMMA      | 678  | 822  | 12174 | 2322 | 0.226 | 0.063 | 0.548 | 0.452 | 0.840 | 0.803 | 0.301 | 0.508 |
| MAST       | 25   | 1475 | 11521 | 2975 | 0.008 | 0.113 | 0.983 | 0.017 | 0.795 | 0.722 | 0.011 | 0.405 |
| Monocle    | 776  | 716  | 12280 | 2224 | 0.259 | 0.055 | 0.480 | 0.520 | 0.847 | 0.816 | 0.346 | 0.539 |
| NBSeq      | 312  | 1188 | 11808 | 2688 | 0.104 | 0.091 | 0.792 | 0.208 | 0.815 | 0.758 | 0.139 | 0.461 |
| NODES      | 72   | 1428 | 11568 | 2928 | 0.024 | 0.110 | 0.952 | 0.048 | 0.798 | 0.728 | 0.032 | 0.411 |
| ROTS       | 7    | 1493 | 11503 | 2993 | 0.002 | 0.115 | 0.995 | 0.005 | 0.794 | 0.720 | 0.003 | 0.402 |
| scDD       | 82   | 1418 | 11578 | 2918 | 0.027 | 0.109 | 0.945 | 0.055 | 0.799 | 0.729 | 0.036 | 0.413 |
| T-test     | 5    | 1495 | 11501 | 2995 | 0.002 | 0.115 | 0.997 | 0.003 | 0.793 | 0.719 | 0.002 | 0.402 |
| Wilcox     | 4    | 1496 | 11500 | 2996 | 0.001 | 0.115 | 0.997 | 0.003 | 0.793 | 0.719 | 0.002 | 0.401 |
| DEG = 2000 |      |      |       |      |       |       |       |       |       |       |       |       |
| BPSC       | 3    | 1993 | 11003 | 2997 | 0.001 | 0.153 | 0.998 | 0.002 | 0.786 | 0.688 | 0.001 | 0.400 |
| DECENT     | 1069 | 931  | 12065 | 1931 | 0.356 | 0.072 | 0.466 | 0.535 | 0.862 | 0.821 | 0.428 | 0.598 |
| DEGSeq     | 844  | 1152 | 11844 | 2156 | 0.281 | 0.089 | 0.577 | 0.423 | 0.846 | 0.793 | 0.338 | 0.536 |
| DESeqLRT   | 189  | 1811 | 11185 | 2811 | 0.063 | 0.139 | 0.906 | 0.095 | 0.799 | 0.711 | 0.076 | 0.420 |
| DESeqNB    | 406  | 1594 | 11402 | 2594 | 0.135 | 0.123 | 0.797 | 0.203 | 0.815 | 0.738 | 0.162 | 0.475 |
| DESingle   | 0    | 1992 | 11004 | 3000 | 0.000 | 0.153 | 1.000 | 0.000 | 0.786 | 0.688 | 0.000 | 0.400 |
| EBSeq      | 1469 | 531  | 12465 | 1531 | 0.490 | 0.041 | 0.266 | 0.735 | 0.891 | 0.871 | 0.588 | 0.755 |
| edgeRLRT   | 5    | 1995 | 11001 | 2995 | 0.002 | 0.154 | 0.998 | 0.003 | 0.786 | 0.688 | 0.002 | 0.402 |
| edgeRQLF   | 6    | 1994 | 11002 | 2994 | 0.002 | 0.153 | 0.997 | 0.003 | 0.786 | 0.688 | 0.002 | 0.402 |
| EMDomics   | 406  | 1589 | 11407 | 2594 | 0.135 | 0.122 | 0.796 | 0.204 | 0.815 | 0.738 | 0.163 | 0.475 |
| LIMMA      | 936  | 1064 | 11932 | 2064 | 0.312 | 0.082 | 0.532 | 0.468 | 0.853 | 0.804 | 0.374 | 0.545 |
| MAST       | 34   | 1966 | 11030 | 2966 | 0.011 | 0.151 | 0.983 | 0.017 | 0.788 | 0.692 | 0.014 | 0.406 |
| Monocle    | 989  | 1002 | 11994 | 2011 | 0.330 | 0.077 | 0.503 | 0.497 | 0.856 | 0.812 | 0.396 | 0.582 |
| NBSeq      | 408  | 1592 | 11404 | 2592 | 0.136 | 0.122 | 0.796 | 0.204 | 0.815 | 0.738 | 0.163 | 0.476 |
| NODES      | 106  | 1894 | 11102 | 2894 | 0.035 | 0.146 | 0.947 | 0.053 | 0.793 | 0.701 | 0.042 | 0.416 |
| ROTS       | 7    | 1993 | 11003 | 2993 | 0.002 | 0.153 | 0.997 | 0.004 | 0.786 | 0.688 | 0.003 | 0.402 |
| scDD       | 108  | 1892 | 11104 | 2892 | 0.036 | 0.146 | 0.946 | 0.054 | 0.793 | 0.701 | 0.043 | 0.418 |
| T-test     | 5    | 1995 | 11001 | 2995 | 0.002 | 0.154 | 0.998 | 0.003 | 0.786 | 0.688 | 0.002 | 0.402 |
| Wilcox     | 4    | 1996 | 11000 | 2996 | 0.001 | 0.154 | 0.998 | 0.002 | 0.786 | 0.688 | 0.002 | 0.401 |
| DEG = 2500 |      |      |       |      |       |       |       |       |       |       |       |       |
| BPSC       | 5    | 2488 | 10508 | 2995 | 0.002 | 0.191 | 0.998 | 0.002 | 0.778 | 0.657 | 0.002 | 0.401 |
| DECENT     | 1351 | 1149 | 11847 | 1649 | 0.450 | 0.088 | 0.460 | 0.540 | 0.878 | 0.825 | 0.491 | 0.638 |
| DEGSeq     | 1064 | 1430 | 11566 | 1936 | 0.355 | 0.110 | 0.573 | 0.427 | 0.857 | 0.790 | 0.387 | 0.572 |
| DESeqLRT   | 275  | 2225 | 10771 | 2725 | 0.092 | 0.171 | 0.890 | 0.110 | 0.798 | 0.691 | 0.100 | 0.430 |
| DESeqNB    | 495  | 2005 | 10991 | 2505 | 0.165 | 0.154 | 0.802 | 0.198 | 0.814 | 0.718 | 0.180 | 0.490 |
| DESingle   | 10   | 2482 | 10514 | 2990 | 0.003 | 0.191 | 0.996 | 0.004 | 0.779 | 0.658 | 0.004 | 0.400 |

|          |      |      |       |      |       |       |       |       |       |       |       |       |
|----------|------|------|-------|------|-------|-------|-------|-------|-------|-------|-------|-------|
| EBSeq    | 1683 | 817  | 12179 | 1317 | 0.561 | 0.063 | 0.327 | 0.673 | 0.902 | 0.867 | 0.612 | 0.816 |
| edgeRLRT | 5    | 2495 | 10501 | 2995 | 0.002 | 0.192 | 0.998 | 0.002 | 0.778 | 0.657 | 0.002 | 0.402 |
| edgeRQLF | 6    | 2494 | 10502 | 2994 | 0.002 | 0.192 | 0.998 | 0.002 | 0.778 | 0.657 | 0.002 | 0.402 |
| EMDomics | 495  | 2000 | 10996 | 2505 | 0.165 | 0.154 | 0.802 | 0.198 | 0.814 | 0.718 | 0.180 | 0.491 |
| LIMMA    | 1174 | 1326 | 11670 | 1826 | 0.391 | 0.102 | 0.530 | 0.470 | 0.865 | 0.803 | 0.427 | 0.586 |
| MAST     | 47   | 2453 | 10543 | 2953 | 0.016 | 0.189 | 0.981 | 0.019 | 0.781 | 0.662 | 0.017 | 0.407 |
| Monocle  | 1171 | 1319 | 11677 | 1829 | 0.390 | 0.101 | 0.530 | 0.470 | 0.865 | 0.803 | 0.427 | 0.623 |
| NBSeq    | 487  | 2013 | 10983 | 2513 | 0.162 | 0.155 | 0.805 | 0.195 | 0.814 | 0.717 | 0.177 | 0.492 |
| NODES    | 137  | 2363 | 10633 | 2863 | 0.046 | 0.182 | 0.945 | 0.055 | 0.788 | 0.673 | 0.050 | 0.421 |
| ROTS     | 9    | 2491 | 10505 | 2991 | 0.003 | 0.192 | 0.996 | 0.004 | 0.778 | 0.657 | 0.003 | 0.402 |
| scDD     | 134  | 2366 | 10630 | 2866 | 0.045 | 0.182 | 0.946 | 0.054 | 0.788 | 0.673 | 0.049 | 0.422 |
| T-test   | 5    | 2495 | 10501 | 2995 | 0.002 | 0.192 | 0.998 | 0.002 | 0.778 | 0.657 | 0.002 | 0.402 |
| Wilcox   | 5    | 2495 | 10501 | 2995 | 0.002 | 0.192 | 0.998 | 0.002 | 0.778 | 0.657 | 0.002 | 0.401 |

DEG = 3000

|          |      |      |       |      |       |       |       |       |       |       |       |       |
|----------|------|------|-------|------|-------|-------|-------|-------|-------|-------|-------|-------|
| BPSC     | 5    | 2987 | 10009 | 2995 | 0.002 | 0.230 | 0.998 | 0.002 | 0.770 | 0.626 | 0.002 | 0.401 |
| DECENT   | 1625 | 1375 | 11621 | 1375 | 0.542 | 0.106 | 0.458 | 0.542 | 0.894 | 0.828 | 0.542 | 0.680 |
| DEGSeq   | 1275 | 1717 | 11279 | 1725 | 0.425 | 0.132 | 0.574 | 0.426 | 0.867 | 0.785 | 0.426 | 0.608 |
| DESeqLRT | 371  | 2629 | 10367 | 2629 | 0.124 | 0.202 | 0.876 | 0.124 | 0.798 | 0.671 | 0.124 | 0.442 |
| DESeqNB  | 562  | 2438 | 10558 | 2438 | 0.187 | 0.188 | 0.813 | 0.187 | 0.812 | 0.695 | 0.187 | 0.506 |
| DESingle | 10   | 2982 | 10014 | 2990 | 0.003 | 0.229 | 0.997 | 0.003 | 0.770 | 0.627 | 0.003 | 0.401 |
| EBSeq    | 1834 | 1166 | 11830 | 1166 | 0.611 | 0.090 | 0.389 | 0.611 | 0.910 | 0.854 | 0.611 | 0.867 |
| edgeRLRT | 5    | 2995 | 10001 | 2995 | 0.002 | 0.230 | 0.998 | 0.002 | 0.770 | 0.626 | 0.002 | 0.402 |
| edgeRQLF | 6    | 2994 | 10002 | 2994 | 0.002 | 0.230 | 0.998 | 0.002 | 0.770 | 0.626 | 0.002 | 0.402 |
| EMDomics | 563  | 2432 | 10564 | 2437 | 0.188 | 0.187 | 0.812 | 0.188 | 0.813 | 0.696 | 0.188 | 0.506 |
| LIMMA    | 1395 | 1605 | 11391 | 1605 | 0.465 | 0.123 | 0.535 | 0.465 | 0.877 | 0.799 | 0.465 | 0.628 |
| MAST     | 68   | 2932 | 10064 | 2932 | 0.023 | 0.226 | 0.977 | 0.023 | 0.774 | 0.633 | 0.023 | 0.409 |
| Monocle  | 1328 | 1662 | 11334 | 1672 | 0.443 | 0.128 | 0.556 | 0.444 | 0.871 | 0.792 | 0.443 | 0.664 |
| NBSeq    | 568  | 2432 | 10564 | 2432 | 0.189 | 0.187 | 0.811 | 0.189 | 0.813 | 0.696 | 0.189 | 0.506 |
| NODES    | 182  | 2818 | 10178 | 2818 | 0.061 | 0.217 | 0.939 | 0.061 | 0.783 | 0.648 | 0.061 | 0.426 |
| ROTS     | 11   | 2989 | 10007 | 2989 | 0.004 | 0.230 | 0.996 | 0.004 | 0.770 | 0.626 | 0.004 | 0.402 |
| scDD     | 159  | 2841 | 10155 | 2841 | 0.053 | 0.219 | 0.947 | 0.053 | 0.781 | 0.645 | 0.053 | 0.427 |
| T-test   | 7    | 2993 | 10003 | 2993 | 0.002 | 0.230 | 0.998 | 0.002 | 0.770 | 0.626 | 0.002 | 0.402 |
| Wilcox   | 5    | 2995 | 10001 | 2995 | 0.002 | 0.230 | 0.998 | 0.002 | 0.770 | 0.626 | 0.002 | 0.401 |

TP: True Positives; FP: False Positives; TN: True Negatives; FN: False Negatives; TPR: True Positive Rate; FPR: False Positive Rate; FDR: False Discovery Rate; PPR: Positive Prediction Rate; NPV: Negative Prediction Value; ACC: Accuracy; F1: F1 score; AUROC: Area Under Receiver Operating Curve

**Table S18.** Evaluation of DE methods based on performance evaluation metrics for Chen data.

| Methods | TP | FP | TN | FN | TPR | FPR | FDR | PPR | NPV | ACC | F1 | AUROC |
|---------|----|----|----|----|-----|-----|-----|-----|-----|-----|----|-------|
|---------|----|----|----|----|-----|-----|-----|-----|-----|-----|----|-------|

DEG = 500



|            |     |      |       |      |       |       |       |       |       |       |       |       |
|------------|-----|------|-------|------|-------|-------|-------|-------|-------|-------|-------|-------|
| BPSC       | 59  | 441  | 14965 | 2941 | 0.020 | 0.029 | 0.882 | 0.118 | 0.836 | 0.816 | 0.034 | 0.411 |
| DECENT     | 146 | 354  | 15052 | 2854 | 0.049 | 0.023 | 0.708 | 0.292 | 0.841 | 0.826 | 0.083 | 0.424 |
| DEGSeq     | 46  | 454  | 14952 | 2954 | 0.015 | 0.029 | 0.908 | 0.092 | 0.835 | 0.815 | 0.026 | 0.408 |
| DESeqLRT   | 40  | 460  | 14946 | 2960 | 0.013 | 0.030 | 0.920 | 0.080 | 0.835 | 0.814 | 0.023 | 0.409 |
| DESeqNB    | 75  | 425  | 14981 | 2925 | 0.025 | 0.028 | 0.850 | 0.150 | 0.837 | 0.818 | 0.043 | 0.413 |
| DEsingle   | 78  | 422  | 14984 | 2922 | 0.026 | 0.027 | 0.844 | 0.156 | 0.837 | 0.818 | 0.045 | 0.413 |
| EBSeq      | 207 | 293  | 15113 | 2793 | 0.069 | 0.019 | 0.586 | 0.414 | 0.844 | 0.832 | 0.118 | 0.446 |
| edgeRLRT   | 103 | 397  | 15009 | 2897 | 0.034 | 0.026 | 0.794 | 0.206 | 0.838 | 0.821 | 0.059 | 0.417 |
| edgeQLF    | 133 | 367  | 15039 | 2867 | 0.044 | 0.024 | 0.734 | 0.266 | 0.840 | 0.824 | 0.076 | 0.421 |
| LIMMA      | 144 | 356  | 15050 | 2856 | 0.048 | 0.023 | 0.712 | 0.288 | 0.841 | 0.825 | 0.082 | 0.426 |
| MAST       | 83  | 417  | 14989 | 2917 | 0.028 | 0.027 | 0.834 | 0.166 | 0.837 | 0.819 | 0.047 | 0.416 |
| Monocle    | 94  | 406  | 15000 | 2906 | 0.031 | 0.026 | 0.812 | 0.188 | 0.838 | 0.820 | 0.054 | 0.418 |
| NBSeq      | 96  | 404  | 15002 | 2904 | 0.032 | 0.026 | 0.808 | 0.192 | 0.838 | 0.820 | 0.055 | 0.420 |
| NODES      | 68  | 432  | 14974 | 2932 | 0.023 | 0.028 | 0.864 | 0.136 | 0.836 | 0.817 | 0.039 | 0.412 |
| ROTS       | 57  | 443  | 14963 | 2943 | 0.019 | 0.029 | 0.886 | 0.114 | 0.836 | 0.816 | 0.033 | 0.411 |
| scDD       | 16  | 484  | 14922 | 2984 | 0.005 | 0.031 | 0.968 | 0.032 | 0.833 | 0.812 | 0.009 | 0.403 |
| T-test     | 99  | 401  | 15005 | 2901 | 0.033 | 0.026 | 0.802 | 0.198 | 0.838 | 0.821 | 0.057 | 0.417 |
| Wilcox     | 110 | 390  | 15016 | 2890 | 0.037 | 0.025 | 0.780 | 0.220 | 0.839 | 0.822 | 0.063 | 0.418 |
| DEG = 1000 |     |      |       |      |       |       |       |       |       |       |       |       |
| BPSC       | 101 | 899  | 14507 | 2899 | 0.034 | 0.058 | 0.899 | 0.101 | 0.833 | 0.794 | 0.051 | 0.419 |
| DECENT     | 242 | 758  | 14648 | 2758 | 0.081 | 0.049 | 0.758 | 0.242 | 0.842 | 0.809 | 0.121 | 0.447 |
| DEGSeq     | 118 | 882  | 14524 | 2882 | 0.039 | 0.057 | 0.882 | 0.118 | 0.834 | 0.796 | 0.059 | 0.417 |
| DESeqLRT   | 66  | 934  | 14472 | 2934 | 0.022 | 0.061 | 0.934 | 0.066 | 0.831 | 0.790 | 0.033 | 0.414 |
| DESeqNB    | 142 | 858  | 14548 | 2858 | 0.047 | 0.056 | 0.858 | 0.142 | 0.836 | 0.798 | 0.071 | 0.424 |
| DEsingle   | 152 | 848  | 14558 | 2848 | 0.051 | 0.055 | 0.848 | 0.152 | 0.836 | 0.799 | 0.076 | 0.427 |
| EBSeq      | 382 | 618  | 14788 | 2618 | 0.127 | 0.040 | 0.618 | 0.382 | 0.850 | 0.824 | 0.191 | 0.473 |
| edgeRLRT   | 185 | 815  | 14591 | 2815 | 0.062 | 0.053 | 0.815 | 0.185 | 0.838 | 0.803 | 0.093 | 0.433 |
| edgeQLF    | 229 | 771  | 14635 | 2771 | 0.076 | 0.050 | 0.771 | 0.229 | 0.841 | 0.808 | 0.115 | 0.442 |
| LIMMA      | 318 | 682  | 14724 | 2682 | 0.106 | 0.044 | 0.682 | 0.318 | 0.846 | 0.817 | 0.159 | 0.451 |
| MAST       | 133 | 867  | 14539 | 2867 | 0.044 | 0.056 | 0.867 | 0.133 | 0.835 | 0.797 | 0.067 | 0.427 |
| Monocle    | 186 | 814  | 14592 | 2814 | 0.062 | 0.053 | 0.814 | 0.186 | 0.838 | 0.803 | 0.093 | 0.433 |
| NBSeq      | 158 | 842  | 14564 | 2842 | 0.053 | 0.055 | 0.842 | 0.158 | 0.837 | 0.800 | 0.079 | 0.433 |
| NODES      | 143 | 857  | 14549 | 2857 | 0.048 | 0.056 | 0.857 | 0.143 | 0.836 | 0.798 | 0.072 | 0.423 |
| ROTS       | 104 | 896  | 14510 | 2896 | 0.035 | 0.058 | 0.896 | 0.104 | 0.834 | 0.794 | 0.052 | 0.419 |
| scDD       | 44  | 956  | 14450 | 2956 | 0.015 | 0.062 | 0.956 | 0.044 | 0.830 | 0.787 | 0.022 | 0.406 |
| T-test     | 178 | 822  | 14584 | 2822 | 0.059 | 0.053 | 0.822 | 0.178 | 0.838 | 0.802 | 0.089 | 0.432 |
| Wilcox     | 226 | 774  | 14632 | 2774 | 0.075 | 0.050 | 0.774 | 0.226 | 0.841 | 0.807 | 0.113 | 0.436 |
| DEG = 1500 |     |      |       |      |       |       |       |       |       |       |       |       |
| BPSC       | 137 | 1363 | 14043 | 2863 | 0.046 | 0.088 | 0.909 | 0.091 | 0.831 | 0.770 | 0.061 | 0.426 |
| DECENT     | 314 | 1186 | 14220 | 2686 | 0.105 | 0.077 | 0.791 | 0.209 | 0.841 | 0.790 | 0.140 | 0.463 |
| DEGSeq     | 200 | 1300 | 14106 | 2800 | 0.067 | 0.084 | 0.867 | 0.133 | 0.834 | 0.777 | 0.089 | 0.430 |
| DESeqLRT   | 86  | 1414 | 13992 | 2914 | 0.029 | 0.092 | 0.943 | 0.057 | 0.828 | 0.765 | 0.038 | 0.418 |
| DESeqNB    | 222 | 1278 | 14128 | 2778 | 0.074 | 0.083 | 0.852 | 0.148 | 0.836 | 0.780 | 0.099 | 0.435 |

|            |     |      |       |      |       |       |       |       |       |       |       |       |
|------------|-----|------|-------|------|-------|-------|-------|-------|-------|-------|-------|-------|
| DEsingle   | 222 | 1278 | 14128 | 2778 | 0.074 | 0.083 | 0.852 | 0.148 | 0.836 | 0.780 | 0.099 | 0.439 |
| EBSeq      | 562 | 938  | 14468 | 2438 | 0.187 | 0.061 | 0.625 | 0.375 | 0.856 | 0.817 | 0.250 | 0.500 |
| edgeRLRT   | 273 | 1227 | 14179 | 2727 | 0.091 | 0.080 | 0.818 | 0.182 | 0.839 | 0.785 | 0.121 | 0.447 |
| edgeRQLF   | 306 | 1194 | 14212 | 2694 | 0.102 | 0.078 | 0.796 | 0.204 | 0.841 | 0.789 | 0.136 | 0.459 |
| LIMMA      | 470 | 1030 | 14376 | 2530 | 0.157 | 0.067 | 0.687 | 0.313 | 0.850 | 0.807 | 0.209 | 0.478 |
| MAST       | 162 | 1338 | 14068 | 2838 | 0.054 | 0.087 | 0.892 | 0.108 | 0.832 | 0.773 | 0.072 | 0.435 |
| Monocle    | 278 | 1222 | 14184 | 2722 | 0.093 | 0.079 | 0.815 | 0.185 | 0.839 | 0.786 | 0.124 | 0.448 |
| NBSeq      | 199 | 1301 | 14105 | 2801 | 0.066 | 0.084 | 0.867 | 0.133 | 0.834 | 0.777 | 0.088 | 0.442 |
| NODES      | 188 | 1312 | 14094 | 2812 | 0.063 | 0.085 | 0.875 | 0.125 | 0.834 | 0.776 | 0.084 | 0.435 |
| ROTS       | 145 | 1355 | 14051 | 2855 | 0.048 | 0.088 | 0.903 | 0.097 | 0.831 | 0.771 | 0.064 | 0.426 |
| scDD       | 65  | 1435 | 13971 | 2935 | 0.022 | 0.093 | 0.957 | 0.043 | 0.826 | 0.763 | 0.029 | 0.410 |
| T-test     | 271 | 1229 | 14177 | 2729 | 0.090 | 0.080 | 0.819 | 0.181 | 0.839 | 0.785 | 0.120 | 0.446 |
| Wilcox     | 321 | 1179 | 14227 | 2679 | 0.107 | 0.077 | 0.786 | 0.214 | 0.842 | 0.790 | 0.143 | 0.455 |
| DEG = 2000 |     |      |       |      |       |       |       |       |       |       |       |       |
| BPSC       | 174 | 1826 | 13580 | 2826 | 0.058 | 0.119 | 0.913 | 0.087 | 0.828 | 0.747 | 0.070 | 0.432 |
| DECENT     | 392 | 1608 | 13798 | 2608 | 0.131 | 0.104 | 0.804 | 0.196 | 0.841 | 0.771 | 0.157 | 0.477 |
| DEGSeq     | 250 | 1750 | 13656 | 2750 | 0.083 | 0.114 | 0.875 | 0.125 | 0.832 | 0.756 | 0.100 | 0.441 |
| DESeqLRT   | 109 | 1891 | 13515 | 2891 | 0.036 | 0.123 | 0.946 | 0.055 | 0.824 | 0.740 | 0.044 | 0.421 |
| DESeqNB    | 325 | 1675 | 13731 | 2675 | 0.108 | 0.109 | 0.838 | 0.163 | 0.837 | 0.764 | 0.130 | 0.449 |
| DEsingle   | 289 | 1711 | 13695 | 2711 | 0.096 | 0.111 | 0.856 | 0.145 | 0.835 | 0.760 | 0.116 | 0.451 |
| EBSeq      | 699 | 1301 | 14105 | 2301 | 0.233 | 0.084 | 0.651 | 0.350 | 0.860 | 0.804 | 0.280 | 0.529 |
| edgeRLRT   | 347 | 1653 | 13753 | 2653 | 0.116 | 0.107 | 0.827 | 0.174 | 0.838 | 0.766 | 0.139 | 0.462 |
| edgeRQLF   | 380 | 1620 | 13786 | 2620 | 0.127 | 0.105 | 0.810 | 0.190 | 0.840 | 0.770 | 0.152 | 0.474 |
| LIMMA      | 627 | 1373 | 14033 | 2373 | 0.209 | 0.089 | 0.687 | 0.314 | 0.855 | 0.796 | 0.251 | 0.504 |
| MAST       | 179 | 1821 | 13585 | 2821 | 0.060 | 0.118 | 0.911 | 0.090 | 0.828 | 0.748 | 0.072 | 0.441 |
| Monocle    | 365 | 1635 | 13771 | 2635 | 0.122 | 0.106 | 0.818 | 0.183 | 0.839 | 0.768 | 0.146 | 0.463 |
| NBSeq      | 252 | 1748 | 13658 | 2748 | 0.084 | 0.113 | 0.874 | 0.126 | 0.833 | 0.756 | 0.101 | 0.451 |
| NODES      | 212 | 1788 | 13618 | 2788 | 0.071 | 0.116 | 0.894 | 0.106 | 0.830 | 0.751 | 0.085 | 0.443 |
| ROTS       | 174 | 1826 | 13580 | 2826 | 0.058 | 0.119 | 0.913 | 0.087 | 0.828 | 0.747 | 0.070 | 0.433 |
| scDD       | 80  | 1920 | 13486 | 2920 | 0.027 | 0.125 | 0.960 | 0.040 | 0.822 | 0.737 | 0.032 | 0.414 |
| T-test     | 340 | 1660 | 13746 | 2660 | 0.113 | 0.108 | 0.830 | 0.170 | 0.838 | 0.765 | 0.136 | 0.460 |
| Wilcox     | 397 | 1603 | 13803 | 2603 | 0.132 | 0.104 | 0.802 | 0.199 | 0.841 | 0.771 | 0.159 | 0.473 |
| DEG = 2500 |     |      |       |      |       |       |       |       |       |       |       |       |
| BPSC       | 225 | 2275 | 13131 | 2775 | 0.075 | 0.148 | 0.910 | 0.090 | 0.826 | 0.726 | 0.082 | 0.439 |
| DECENT     | 454 | 2046 | 13360 | 2546 | 0.151 | 0.133 | 0.818 | 0.182 | 0.840 | 0.751 | 0.165 | 0.491 |
| DEGSeq     | 299 | 2201 | 13205 | 2701 | 0.100 | 0.143 | 0.880 | 0.120 | 0.830 | 0.734 | 0.109 | 0.451 |
| DESeqLRT   | 128 | 2372 | 13034 | 2872 | 0.043 | 0.154 | 0.949 | 0.051 | 0.819 | 0.715 | 0.047 | 0.425 |
| DESeqNB    | 397 | 2103 | 13303 | 2603 | 0.132 | 0.137 | 0.841 | 0.159 | 0.836 | 0.744 | 0.144 | 0.463 |
| DEsingle   | 322 | 2178 | 13228 | 2678 | 0.107 | 0.141 | 0.871 | 0.129 | 0.832 | 0.736 | 0.117 | 0.462 |
| EBSeq      | 822 | 1678 | 13728 | 2178 | 0.274 | 0.109 | 0.671 | 0.329 | 0.863 | 0.791 | 0.299 | 0.556 |
| edgeRLRT   | 422 | 2078 | 13328 | 2578 | 0.141 | 0.135 | 0.831 | 0.169 | 0.838 | 0.747 | 0.153 | 0.475 |
| edgeRQLF   | 450 | 2050 | 13356 | 2550 | 0.150 | 0.133 | 0.820 | 0.180 | 0.840 | 0.750 | 0.164 | 0.488 |
| LIMMA      | 794 | 1706 | 13700 | 2206 | 0.265 | 0.111 | 0.682 | 0.318 | 0.861 | 0.787 | 0.289 | 0.530 |

|         |     |      |       |      |       |       |       |       |       |       |       |       |
|---------|-----|------|-------|------|-------|-------|-------|-------|-------|-------|-------|-------|
| MAST    | 207 | 2293 | 13113 | 2793 | 0.069 | 0.149 | 0.917 | 0.083 | 0.824 | 0.724 | 0.075 | 0.446 |
| Monocle | 453 | 2047 | 13359 | 2547 | 0.151 | 0.133 | 0.819 | 0.181 | 0.840 | 0.750 | 0.165 | 0.478 |
| NBSeq   | 310 | 2190 | 13216 | 2690 | 0.103 | 0.142 | 0.876 | 0.124 | 0.831 | 0.735 | 0.113 | 0.459 |
| NODES   | 243 | 2257 | 13149 | 2757 | 0.081 | 0.147 | 0.903 | 0.097 | 0.827 | 0.728 | 0.088 | 0.450 |
| ROTS    | 212 | 2288 | 13118 | 2788 | 0.071 | 0.149 | 0.915 | 0.085 | 0.825 | 0.724 | 0.077 | 0.440 |
| scDD    | 100 | 2400 | 13006 | 2900 | 0.033 | 0.156 | 0.960 | 0.040 | 0.818 | 0.712 | 0.036 | 0.417 |
| T-test  | 416 | 2084 | 13322 | 2584 | 0.139 | 0.135 | 0.834 | 0.166 | 0.838 | 0.746 | 0.151 | 0.474 |
| Wilcox  | 454 | 2046 | 13360 | 2546 | 0.151 | 0.133 | 0.818 | 0.182 | 0.840 | 0.751 | 0.165 | 0.488 |

DEG = 3000

|          |     |      |       |      |       |       |       |       |       |       |       |       |
|----------|-----|------|-------|------|-------|-------|-------|-------|-------|-------|-------|-------|
| BPSC     | 265 | 2735 | 12671 | 2735 | 0.088 | 0.178 | 0.912 | 0.088 | 0.822 | 0.703 | 0.088 | 0.446 |
| DECENT   | 519 | 2481 | 12925 | 2481 | 0.173 | 0.161 | 0.827 | 0.173 | 0.839 | 0.730 | 0.173 | 0.503 |
| DEGSeq   | 351 | 2649 | 12757 | 2649 | 0.117 | 0.172 | 0.883 | 0.117 | 0.828 | 0.712 | 0.117 | 0.461 |
| DESeqLRT | 149 | 2851 | 12555 | 2851 | 0.050 | 0.185 | 0.950 | 0.050 | 0.815 | 0.690 | 0.050 | 0.429 |
| DESeqNB  | 462 | 2538 | 12868 | 2538 | 0.154 | 0.165 | 0.846 | 0.154 | 0.835 | 0.724 | 0.154 | 0.477 |
| DEsingle | 363 | 2637 | 12769 | 2637 | 0.121 | 0.171 | 0.879 | 0.121 | 0.829 | 0.713 | 0.121 | 0.471 |
| EBSeq    | 946 | 2054 | 13352 | 2054 | 0.315 | 0.133 | 0.685 | 0.315 | 0.867 | 0.777 | 0.315 | 0.582 |
| edgeRLRT | 479 | 2521 | 12885 | 2521 | 0.160 | 0.164 | 0.840 | 0.160 | 0.836 | 0.726 | 0.160 | 0.489 |
| edgeQLF  | 508 | 2492 | 12914 | 2492 | 0.169 | 0.162 | 0.831 | 0.169 | 0.838 | 0.729 | 0.169 | 0.501 |
| LIMMA    | 966 | 2034 | 13372 | 2034 | 0.322 | 0.132 | 0.678 | 0.322 | 0.868 | 0.779 | 0.322 | 0.556 |
| MAST     | 236 | 2764 | 12642 | 2764 | 0.079 | 0.179 | 0.921 | 0.079 | 0.821 | 0.700 | 0.079 | 0.451 |
| Monocle  | 516 | 2484 | 12922 | 2484 | 0.172 | 0.161 | 0.828 | 0.172 | 0.839 | 0.730 | 0.172 | 0.492 |
| NBSeq    | 361 | 2639 | 12767 | 2639 | 0.120 | 0.171 | 0.880 | 0.120 | 0.829 | 0.713 | 0.120 | 0.468 |
| NODES    | 270 | 2730 | 12676 | 2730 | 0.090 | 0.177 | 0.910 | 0.090 | 0.823 | 0.703 | 0.090 | 0.456 |
| ROTS     | 251 | 2749 | 12657 | 2749 | 0.084 | 0.178 | 0.916 | 0.084 | 0.822 | 0.701 | 0.084 | 0.446 |
| scDD     | 119 | 2881 | 12525 | 2881 | 0.040 | 0.187 | 0.960 | 0.040 | 0.813 | 0.687 | 0.040 | 0.420 |
| T-test   | 468 | 2532 | 12874 | 2532 | 0.156 | 0.164 | 0.844 | 0.156 | 0.836 | 0.725 | 0.156 | 0.487 |
| Wilcox   | 517 | 2483 | 12923 | 2483 | 0.172 | 0.161 | 0.828 | 0.172 | 0.839 | 0.730 | 0.172 | 0.501 |

TP: True Positives; FP: False Positives; TN: True Negatives; FN: False Negatives; TPR: True Positive Rate; FPR: False Positive Rate; FDR: False Discovery Rate; PPR: Positive Prediction Rate; NPV: Negative Prediction Value; ACC: Accuracy; F1: F1 score; AUROC: Area Under Receiver Operating Curve

**Table S19.** Ranking of DE methods across all datasets based on the performance metrics.

| Methods | ACC |    |    |    |    |    |    |     |    |      |     | Rank Score |
|---------|-----|----|----|----|----|----|----|-----|----|------|-----|------------|
|         | D1  | D2 | D3 | D4 | D5 | D6 | D7 | D8  | D9 | D10  | D11 |            |
| BPSC    | 15  | 11 | 14 | 1  | 12 | 16 | 12 | 9.5 | 8  | 13.5 | 16  | 4.84       |
| DECENT  | 5   | 4  | 11 | 3  | 4  | 4  | 4  | 1   | 1  | 4    | 2   | 9.32       |

|          |    |     |    |      |     |      |    |     |      |      |     |      |
|----------|----|-----|----|------|-----|------|----|-----|------|------|-----|------|
| DEGSeq   | 16 | 17  | 16 | 9    | 8   | 3    | 13 | 15  | 14   | 12   | 5   | 4.84 |
| DESeqLRT | 8  | 13  | 8  | 15   | 19  | 17   | 18 | 18  | 2    | 17   | 9   | 4    |
| DESeqNB  | 2  | 9   | 2  | 6    | 11  | 11.5 | 15 | 9.5 | 13   | 9    | 8   | 6.53 |
| DEsingle | 13 | 5.5 | 3  | 12.5 | 15  | 7.5  | 10 | 14  | 10   | 10.5 | 13  | 5.58 |
| EBSeq    | 6  | 1   | 13 | 12.5 | 1   | 11.5 | 2  | 6   | 17   | 2    | 1   | 7.74 |
| edgeRLRT | 3  | 3   | 10 | 4    | 2   | 11.5 | 8  | 3.5 | 4    | 7    | 16  | 7.79 |
| edgeRQLF | 1  | 2   | 12 | 2    | 6.5 | 7.5  | 7  | 5   | 5    | 6    | 16  | 7.89 |
| EMDomics | 4  | 7.5 | 4  | 19   | 13  | 1    | 11 | 2   | 18   | 19   | 6.5 | 6.05 |
| LIMMA    | 18 | 10  | 19 | 14   | 10  | 14   | 5  | 7   | 3    | 1    | 3   | 6.11 |
| MAST     | 14 | 5.5 | 15 | 5    | 6.5 | 2    | 17 | 13  | 12   | 16   | 12  | 5.37 |
| Monocle  | 10 | 15  | 9  | 11   | 5   | 6    | 1  | 12  | 9    | 4    | 4   | 7.05 |
| NBSeq    | 12 | 12  | 7  | 18   | 3   | 5    | 3  | 8   | 6.5  | 10.5 | 6.5 | 6.76 |
| NODES    | 19 | 16  | 5  | 16   | 16  | 18   | 16 | 17  | 15.5 | 13.5 | 10  | 3.05 |
| ROTS     | 11 | 18  | 17 | 8    | 17  | 15   | 14 | 16  | 15.5 | 15   | 16  | 3.03 |
| scDD     | 17 | 19  | 18 | 17   | 18  | 19   | 19 | 19  | 19   | 18   | 11  | 1.37 |
| T-test   | 7  | 14  | 6  | 10   | 9   | 11.5 | 6  | 3.5 | 6.5  | 8    | 16  | 6.45 |
| Wilcox   | 9  | 7.5 | 1  | 7    | 14  | 9    | 9  | 11  | 11   | 4    | 19  | 6.24 |

| TPR      |    |     |    |      |    |      |    |     |    |     |      |            |
|----------|----|-----|----|------|----|------|----|-----|----|-----|------|------------|
| Methods  | D1 | D2  | D3 | D4   | D5 | D6   | D7 | D8  | D9 | D10 | D11  | Rank Score |
| BPSC     | 15 | 11  | 14 | 1    | 12 | 16   | 12 | 10  | 8  | 15  | 16.5 | 4.71       |
| DECENT   | 5  | 4   | 11 | 3    | 4  | 4    | 4  | 1   | 1  | 3   | 2    | 9.37       |
| DEGSeq   | 16 | 17  | 16 | 9    | 8  | 3    | 13 | 15  | 14 | 13  | 5    | 4.79       |
| DESeqLRT | 8  | 13  | 8  | 15   | 19 | 17   | 18 | 18  | 13 | 18  | 9    | 3.37       |
| DESeqNB  | 2  | 9   | 2  | 6    | 11 | 11.5 | 15 | 9   | 2  | 9   | 8    | 7.13       |
| DEsingle | 13 | 5   | 3  | 12.5 | 15 | 7.5  | 11 | 14  | 10 | 11  | 14   | 5.47       |
| EBSeq    | 6  | 1   | 13 | 12.5 | 1  | 11.5 | 2  | 6   | 17 | 2   | 1    | 7.74       |
| edgeRLRT | 3  | 3   | 10 | 4    | 7  | 9.5  | 8  | 3.5 | 4  | 7   | 16.5 | 7.61       |
| edgeRQLF | 1  | 2   | 12 | 2    | 2  | 7.5  | 7  | 5   | 5  | 6   | 16.5 | 8.11       |
| EMDomics | 4  | 7.5 | 4  | 19   | 13 | 1    | 10 | 2   | 18 | 10  | 7    | 6.55       |
| LIMMA    | 18 | 10  | 19 | 14   | 10 | 14   | 5  | 7   | 3  | 1   | 3    | 6.11       |
| MAST     | 14 | 6   | 15 | 5    | 6  | 2    | 17 | 13  | 12 | 17  | 12   | 5.32       |
| Monocle  | 10 | 15  | 9  | 11   | 5  | 6    | 1  | 12  | 9  | 4.5 | 4    | 7.03       |
| NBSeq    | 12 | 12  | 7  | 18   | 3  | 5    | 3  | 8   | 7  | 12  | 6    | 6.68       |
| NODES    | 19 | 16  | 5  | 16   | 16 | 18   | 16 | 17  | 15 | 14  | 10   | 3.05       |
| ROTS     | 11 | 18  | 17 | 8    | 17 | 15   | 14 | 16  | 16 | 16  | 13   | 3.11       |
| scDD     | 17 | 19  | 18 | 17   | 18 | 19   | 19 | 19  | 19 | 19  | 11   | 1.32       |
| T-test   | 7  | 14  | 6  | 10   | 9  | 13   | 6  | 3.5 | 6  | 8   | 16.5 | 6.37       |
| Wilcox   | 9  | 7.5 | 1  | 7    | 14 | 9.5  | 9  | 11  | 11 | 4.5 | 19   | 6.18       |

| FPR     |     |      |    |     |    |      |    |      |    |      |     |            |
|---------|-----|------|----|-----|----|------|----|------|----|------|-----|------------|
| Methods | D1  | D2   | D3 | D4  | D5 | D6   | D7 | D8   | D9 | D10  | D11 | Rank Score |
| BPSC    | 15  | 11.5 | 14 | 1   | 12 | 16.5 | 12 | 10.5 | 8  | 15.5 | 16  | 4.63       |
| DECENT  | 4.5 | 4    | 11 | 3   | 4  | 3.5  | 5  | 1    | 1  | 5    | 2   | 9.26       |
| DEGSeq  | 16  | 17   | 16 | 8.5 | 8  | 3.5  | 13 | 15   | 14 | 13   | 5   | 4.79       |

|          |     |      |    |      |    |      |    |      |      |      |     |      |
|----------|-----|------|----|------|----|------|----|------|------|------|-----|------|
| DESeqLRT | 8   | 13   | 8  | 15   | 19 | 16.5 | 18 | 18   | 13   | 18   | 9   | 3.39 |
| DESeqNB  | 2   | 9    | 2  | 6    | 11 | 9.5  | 15 | 10.5 | 2    | 10   | 8   | 7.11 |
| DEsingle | 13  | 5.5  | 3  | 12.5 | 15 | 9.5  | 11 | 14   | 10   | 11.5 | 13  | 5.37 |
| EBSeq    | 6   | 1    | 13 | 12.5 | 1  | 9.5  | 3  | 5.5  | 17   | 2    | 1   | 7.82 |
| edgeRLRT | 3   | 3    | 10 | 4    | 7  | 9.5  | 9  | 3.5  | 4    | 8.5  | 16  | 7.5  |
| edgeRQLF | 1   | 2    | 12 | 2    | 2  | 9.5  | 8  | 5.5  | 5    | 7    | 16  | 7.89 |
| EMDomics | 4.5 | 7.5  | 4  | 19   | 14 | 1    | 1  | 2    | 18   | 3    | 6.5 | 7.34 |
| LIMMA    | 18  | 10   | 19 | 14   | 10 | 14.5 | 6  | 7    | 3    | 1    | 3   | 6.03 |
| MAST     | 14  | 5.5  | 15 | 5    | 6  | 2    | 17 | 13   | 12   | 17   | 12  | 5.34 |
| Monocle  | 10  | 15.5 | 9  | 11   | 5  | 6    | 2  | 12   | 9    | 5    | 4   | 6.92 |
| NBSeq    | 12  | 11.5 | 7  | 18   | 3  | 5    | 4  | 8    | 6.5  | 11.5 | 6.5 | 6.68 |
| NODES    | 19  | 15.5 | 5  | 16   | 16 | 18   | 16 | 17   | 15.5 | 14   | 10  | 3.05 |
| ROTS     | 11  | 18   | 17 | 8.5  | 17 | 14.5 | 14 | 16   | 15.5 | 15.5 | 16  | 3    |
| scDD     | 17  | 19   | 18 | 17   | 18 | 19   | 19 | 19   | 19   | 19   | 11  | 1.32 |
| T-test   | 7   | 14   | 6  | 10   | 9  | 9.5  | 7  | 3.5  | 6.5  | 8.5  | 16  | 6.47 |
| Wilcox   | 9   | 7.5  | 1  | 7    | 13 | 13   | 10 | 9    | 11   | 5    | 19  | 6.08 |

F1

| Methods  | D1 | D2  | D3 | D4   | D5   | D6   | D7 | D8  | D9 | D10 | D11 | Rank Score |
|----------|----|-----|----|------|------|------|----|-----|----|-----|-----|------------|
| BPSC     | 15 | 11  | 14 | 1    | 12   | 16   | 12 | 10  | 8  | 15  | 17  | 4.68       |
| DECENT   | 5  | 4   | 11 | 3    | 4    | 4    | 4  | 1   | 1  | 4   | 2   | 9.32       |
| DEGSeq   | 16 | 17  | 16 | 9    | 8    | 3    | 13 | 15  | 14 | 13  | 5   | 4.79       |
| DESeqLRT | 8  | 13  | 8  | 15   | 19   | 17   | 18 | 18  | 13 | 18  | 9   | 3.37       |
| DESeqNB  | 2  | 9   | 2  | 6    | 11   | 11.5 | 15 | 9   | 2  | 10  | 8   | 7.08       |
| DEsingle | 13 | 5   | 3  | 12.5 | 15   | 7.5  | 10 | 14  | 10 | 11  | 14  | 5.53       |
| EBSeq    | 6  | 1   | 13 | 12.5 | 1    | 11.5 | 2  | 6   | 17 | 2   | 1   | 7.74       |
| edgeRLRT | 3  | 3   | 10 | 4    | 7    | 9.5  | 8  | 3.5 | 4  | 8   | 17  | 7.53       |
| edgeRQLF | 1  | 2   | 12 | 2    | 2    | 7.5  | 7  | 5   | 5  | 7   | 17  | 8.03       |
| EMDomics | 4  | 7.5 | 4  | 19   | 13.5 | 1    | 11 | 2   | 18 | 3   | 7   | 6.84       |
| LIMMA    | 18 | 10  | 19 | 14   | 10   | 14   | 5  | 7   | 3  | 1   | 3   | 6.11       |
| MAST     | 14 | 6   | 15 | 5    | 6    | 2    | 17 | 13  | 12 | 17  | 12  | 5.32       |
| Monocle  | 10 | 15  | 9  | 11   | 5    | 6    | 1  | 12  | 9  | 5.5 | 4   | 6.97       |
| NBSeq    | 12 | 12  | 7  | 18   | 3    | 5    | 3  | 8   | 7  | 12  | 6   | 6.68       |
| NODES    | 19 | 16  | 5  | 16   | 16   | 18   | 16 | 17  | 15 | 14  | 10  | 3.05       |
| ROTS     | 11 | 18  | 17 | 8    | 17   | 15   | 14 | 16  | 16 | 16  | 13  | 3.11       |
| scDD     | 17 | 19  | 18 | 17   | 18   | 19   | 19 | 19  | 19 | 19  | 11  | 1.32       |
| T-test   | 7  | 14  | 6  | 10   | 9    | 13   | 6  | 3.5 | 6  | 9   | 17  | 6.29       |
| Wilcox   | 9  | 7.5 | 1  | 7    | 13.5 | 9.5  | 9  | 11  | 11 | 5.5 | 17  | 6.26       |

D1: Islam; D2: Tung; D3: Ziegenhain; D4: Grun; D5: Soumillion1; D6: Klein; D7: Savas; D8: Soumillion3; D9: Soumillion2; D10: Chen; D11: Geinhein; TPR: True Positive Rate; FPR: False Positive Rate; F1: F1 Score; FDR: False Discovery Rate; AUROC: Area Under Receiver Operating Curve; ACC: Accuracy

**Table S20.** Ranking of DE methods across all datasets through AUROC metric.

| Methods | D1 | D2 | D3 | D4 | D5 | D6 | D7 | D8 | D9 | D10 | D11  | Rank Score |
|---------|----|----|----|----|----|----|----|----|----|-----|------|------------|
| BPSC    | 15 | 11 | 14 | 1  | 12 | 16 | 12 | 10 | 8  | 15  | 16.5 | 4.71       |

|          |    |     |    |      |    |      |    |     |    |     |      |      |
|----------|----|-----|----|------|----|------|----|-----|----|-----|------|------|
| DECENT   | 5  | 4   | 11 | 3    | 4  | 4    | 4  | 1   | 1  | 4   | 2    | 9.32 |
| DEGSeq   | 16 | 17  | 16 | 9    | 8  | 3    | 13 | 15  | 14 | 13  | 5    | 4.79 |
| DESeqLRT | 8  | 13  | 8  | 15   | 19 | 17   | 18 | 18  | 13 | 18  | 9    | 3.37 |
| DESeqNB  | 2  | 9   | 2  | 6    | 11 | 11.5 | 15 | 9   | 2  | 10  | 8    | 7.08 |
| DEsingle | 13 | 5   | 3  | 12.5 | 15 | 7.5  | 11 | 14  | 10 | 11  | 14   | 5.47 |
| EBSeq    | 6  | 1   | 13 | 12.5 | 1  | 11.5 | 2  | 6   | 17 | 2   | 1    | 7.74 |
| edgeRLRT | 3  | 3   | 10 | 4    | 7  | 9.5  | 8  | 3.5 | 4  | 8   | 16.5 | 7.55 |
| edgeRQLF | 1  | 2   | 12 | 2    | 2  | 7.5  | 7  | 5   | 5  | 7   | 16.5 | 8.05 |
| EMDomics | 4  | 7.5 | 4  | 19   | 13 | 1    | 10 | 2   | 18 | 3   | 7    | 6.92 |
| LIMMA    | 18 | 10  | 19 | 14   | 10 | 14   | 5  | 7   | 3  | 1   | 3    | 6.11 |
| MAST     | 14 | 6   | 15 | 5    | 6  | 2    | 17 | 13  | 12 | 17  | 12   | 5.32 |
| Monocle  | 10 | 15  | 9  | 11   | 5  | 6    | 1  | 12  | 9  | 5.5 | 4    | 6.97 |
| NBSeq    | 12 | 12  | 7  | 18   | 3  | 5    | 3  | 8   | 7  | 12  | 6    | 6.68 |
| NODES    | 19 | 16  | 5  | 16   | 16 | 18   | 16 | 17  | 15 | 14  | 10   | 3.05 |
| ROTS     | 11 | 18  | 17 | 8    | 17 | 15   | 14 | 16  | 16 | 16  | 13   | 3.11 |
| scDD     | 17 | 19  | 18 | 17   | 18 | 19   | 19 | 19  | 19 | 19  | 11   | 1.32 |
| T-test   | 7  | 14  | 6  | 10   | 9  | 13   | 6  | 3.5 | 6  | 9   | 16.5 | 6.32 |
| Wilcox   | 9  | 7.5 | 1  | 7    | 14 | 9.5  | 9  | 11  | 11 | 5.5 | 19   | 6.13 |

D1: Islam; D2: Tung; D3: Ziegenhain; D4: Grun; D5: Soumillon1; D6: Klein; D7: Savas; D8: Soumillon3;  
D9: Soumillon2; D10: Chen; D11: Geinhein.

**Table S21.** Ranking of DE methods across all datasets based on the FDR metric.

| Methods  | D1 | D2  | D3   | D4 | D5 | D6 | D7  | D8 | D9 | D10  | D11  | Rank Score |
|----------|----|-----|------|----|----|----|-----|----|----|------|------|------------|
| BPSC     | 15 | 12  | 11.5 | 1  | 14 | 16 | 12  | 12 | 6  | 16.5 | 17.5 | 4.55       |
| DECENT   | 4  | 5   | 13   | 5  | 3  | 2  | 4   | 1  | 1  | 3    | 2    | 9.32       |
| DEGSeq   | 16 | 18  | 16   | 14 | 11 | 4  | 14  | 15 | 18 | 13   | 5    | 4          |
| DESeqLRT | 6  | 11  | 9    | 13 | 19 | 15 | 18  | 18 | 13 | 18   | 9    | 3.74       |
| DESeqNB  | 1  | 8.5 | 2    | 6  | 6  | 11 | 17  | 7  | 2  | 10   | 7    | 7.5        |
| DEsingle | 10 | 6.5 | 3    | 10 | 10 | 8  | 11  | 13 | 9  | 11   | 17.5 | 5.84       |
| EBSeq    | 9  | 2   | 14   | 8  | 1  | 13 | 1   | 10 | 14 | 1    | 1    | 7.68       |
| edgeRLRT | 3  | 3   | 10   | 4  | 8  | 10 | 8.5 | 5  | 5  | 7    | 14.5 | 7.47       |
| edgeRQLF | 2  | 1   | 11.5 | 2  | 2  | 5  | 5   | 4  | 4  | 4.5  | 14.5 | 8.66       |
| EMDomics | 5  | 8.5 | 4    | 19 | 13 | 1  | 10  | 2  | 17 | 9    | 7    | 6.55       |
| LIMMA    | 18 | 10  | 19   | 11 | 15 | 17 | 8.5 | 3  | 3  | 2    | 4    | 5.76       |
| MAST     | 14 | 4   | 15   | 3  | 5  | 3  | 16  | 11 | 12 | 15   | 12   | 5.79       |
| Monocle  | 12 | 16  | 7.5  | 15 | 7  | 9  | 2   | 14 | 11 | 6    | 3    | 6.18       |
| NBSeq    | 11 | 15  | 7.5  | 18 | 4  | 6  | 3   | 8  | 8  | 12   | 7    | 6.34       |
| NODES    | 19 | 13  | 6    | 16 | 16 | 18 | 13  | 16 | 15 | 14   | 11   | 3.32       |
| ROTS     | 13 | 17  | 18   | 9  | 17 | 14 | 15  | 17 | 16 | 16.5 | 14.5 | 2.79       |
| scDD     | 17 | 19  | 17   | 17 | 18 | 19 | 19  | 19 | 19 | 19   | 10   | 1.42       |
| T-test   | 8  | 14  | 5    | 12 | 9  | 12 | 7   | 6  | 7  | 8    | 14.5 | 6.18       |
| Wilcox   | 7  | 6.5 | 1    | 7  | 12 | 7  | 6   | 9  | 10 | 4.5  | 19   | 6.89       |

D1: Islam; D2: Tung; D3: Ziegenhain; D4: Grun; D5: Soumillon1; D6: Klein; D7: Savas; D8: Soumillon3;  
D9: Soumillon2; D10: Chen; D11: Geinhein;

**Table S22.** Conflicts among the criteria for ranking of the DE methods for Geinhein data.

| <b>Methods</b> | <b>C1</b> | <b>C2</b> | <b>C3</b> | <b>C4</b> | <b>C5</b> | <b>C6</b> | <b>C7</b> | <b>C8</b> | <b>C9</b> | <b>C10</b> | <b>C11</b> | <b>C12</b> | <b>C13</b> |
|----------------|-----------|-----------|-----------|-----------|-----------|-----------|-----------|-----------|-----------|------------|------------|------------|------------|
| BPSC           | 17.5      | 14        | 16.5      | 16.5      | 15.5      | 16        | 16.5      | 17.5      | 14        | 17.5       | 16         | 16.5       | 9          |
| DECENT         | 2         | 2         | 2         | 2         | 2         | 2         | 2         | 2         | 2         | 2          | 2          | 2          | 19         |
| DEGSeq         | 5         | 5         | 5         | 5         | 5         | 5         | 5         | 5         | 5         | 5          | 5          | 5          | 3          |
| DESeqLRT       | 9         | 9         | 9         | 9         | 9         | 9         | 9         | 9         | 9         | 9          | 9          | 9          | 5          |
| DESeqNB        | 8         | 8         | 8         | 8         | 8         | 8         | 8         | 7         | 8         | 8          | 8          | 8          | 6          |
| DEsingle       | 14        | 13        | 14        | 14        | 15.5      | 13        | 14        | 17.5      | 13        | 14         | 13         | 14         | 18         |
| EBSeq          | 1         | 1         | 1         | 1         | 1         | 1         | 1         | 1         | 1         | 1          | 1          | 1          | 17         |
| edgeRLRT       | 17.5      | 18        | 16.5      | 16.5      | 15.5      | 16        | 16.5      | 14.5      | 18        | 17.5       | 16         | 16.5       | 8          |
| edgeQLF        | 16        | 17        | 16.5      | 16.5      | 15.5      | 16        | 16.5      | 14.5      | 17        | 16         | 16         | 16.5       | 7          |
| EMDomics       | 7         | 6.5       | 7         | 7         | 6.5       | 6.5       | 7         | 7         | 6.5       | 7          | 6.5        | 7          | 16         |
| LIMMA          | 3         | 3         | 3         | 3         | 3         | 3         | 3         | 4         | 3         | 3          | 3          | 3          | 4          |
| MAST           | 12        | 12        | 12        | 12        | 12        | 12        | 12        | 12        | 12        | 12         | 12         | 12         | 11         |
| Monocle        | 4         | 4         | 4         | 4         | 4         | 4         | 4         | 3         | 4         | 4          | 4          | 4          | 12         |
| NBSeq          | 6         | 6.5       | 6         | 6         | 6.5       | 6.5       | 6         | 7         | 6.5       | 6          | 6.5        | 6          | 14         |
| NODES          | 10        | 10        | 10        | 10        | 10        | 10        | 10        | 11        | 10        | 10         | 10         | 10         | 13         |
| ROTS           | 13        | 15        | 13        | 13        | 15.5      | 16        | 13        | 14.5      | 15        | 13         | 16         | 13         | 15         |
| scDD           | 11        | 11        | 11        | 11        | 11        | 11        | 11        | 10        | 11        | 11         | 11         | 11         | 10         |
| T-test         | 15        | 16        | 16.5      | 16.5      | 15.5      | 16        | 16.5      | 14.5      | 16        | 15         | 16         | 16.5       | 1          |
| Wilcox         | 19        | 19        | 19        | 19        | 19        | 19        | 19        | 19        | 19        | 19         | 19         | 19         | 2          |

C1: True Positive; C2: True negative; C3: True Positive Rate; C4: Positive Prediction Rate; C5: Negative Prediction Value; C6: Accuracy; C7: F1 score; C8: AUROC; C9: False Positive; C10: False Negative; C11: False Positive Rate; C12: False Discovery Rate; C13: Runtime

**Table S23.** Conflicts among the criteria for ranking of the DE methods for Islam data.

| <b>Methods</b> | <b>C1</b> | <b>C2</b> | <b>C3</b> | <b>C4</b> | <b>C5</b> | <b>C6</b> | <b>C7</b> | <b>C8</b> | <b>C9</b> | <b>C10</b> | <b>C11</b> | <b>C12</b> | <b>C13</b> |
|----------------|-----------|-----------|-----------|-----------|-----------|-----------|-----------|-----------|-----------|------------|------------|------------|------------|
| BPSC           | 15        | 15        | 15        | 15        | 15        | 15        | 15        | 15        | 15        | 15         | 15         | 15         | 9          |
| DECENT         | 5         | 5         | 5         | 5         | 4.5       | 5         | 5         | 4         | 5         | 5          | 4.5        | 5          | 19         |
| DEGSeq         | 16        | 16        | 16        | 16        | 16        | 16        | 16        | 16        | 16        | 16         | 16         | 16         | 3          |
| DESeqLRT       | 8         | 8         | 8         | 8         | 8         | 8         | 8         | 6         | 8         | 8          | 8          | 8          | 5          |
| DESeqNB        | 2         | 2         | 2         | 2         | 2         | 2         | 2         | 1         | 2         | 2          | 2          | 2          | 6          |
| DEsingle       | 13        | 13        | 13        | 13        | 13        | 13        | 13        | 10        | 13        | 13         | 13         | 13         | 18         |
| EBSeq          | 6         | 6         | 6         | 6         | 6         | 6         | 6         | 9         | 6         | 6          | 6          | 6          | 17         |
| edgeRLRT       | 3         | 3         | 3         | 3         | 3         | 3         | 3         | 3         | 3         | 3          | 3          | 3          | 8          |
| edgeQLF        | 1         | 1         | 1         | 1         | 1         | 1         | 1         | 2         | 1         | 1          | 1          | 1          | 7          |
| EMDomics       | 4         | 4         | 4         | 4         | 4.5       | 4         | 4         | 5         | 4         | 4          | 4.5        | 4          | 16         |
| LIMMA          | 18        | 18        | 18        | 18        | 18        | 18        | 18        | 18        | 18        | 18         | 18         | 18         | 4          |
| MAST           | 14        | 14        | 14        | 14        | 14        | 14        | 14        | 14        | 14        | 14         | 14         | 14         | 11         |
| Monocle        | 10        | 10        | 10        | 10        | 10        | 10        | 10        | 12        | 10        | 10         | 10         | 10         | 12         |
| NBSeq          | 12        | 12        | 12        | 12        | 12        | 12        | 12        | 11        | 12        | 12         | 12         | 12         | 14         |
| NODES          | 19        | 19        | 19        | 19        | 19        | 19        | 19        | 19        | 19        | 19         | 19         | 19         | 13         |
| ROTS           | 11        | 11        | 11        | 11        | 11        | 11        | 11        | 13        | 11        | 11         | 11         | 11         | 15         |
| scDD           | 17        | 17        | 17        | 17        | 17        | 17        | 17        | 17        | 17        | 17         | 17         | 17         | 10         |
| T-test         | 7         | 7         | 7         | 7         | 7         | 7         | 7         | 8         | 7         | 7          | 7          | 7          | 1          |
| Wilcox         | 9         | 9         | 9         | 9         | 9         | 9         | 9         | 7         | 9         | 9          | 9          | 9          | 2          |

C1: True Positive; C2: True negative; C3: True Positive Rate; C4: Positive Prediction Rate; C5: Negative Prediction Value; C6: Accuracy; C7: F1 score; C8: AUROC; C9: False Positive; C10: False Negative; C11: False Positive Rate; C12: False Discovery Rate; C13: Runtime

**Table S24.** Conflicts among the criteria for ranking of the DE methods for Tung data.

| <u>Methods</u> | <u>C1</u> | <u>C2</u> | <u>C3</u> | <u>C4</u> | <u>C5</u> | <u>C6</u> | <u>C7</u> | <u>C8</u> | <u>C9</u> | <u>C10</u> | <u>C11</u> | <u>C12</u> | <u>C13</u> |
|----------------|-----------|-----------|-----------|-----------|-----------|-----------|-----------|-----------|-----------|------------|------------|------------|------------|
| BPSC           | 11        | 11        | 11        | 11        | 11.5      | 11        | 11        | 12        | 11        | 11         | 11.5       | 11         | 9          |
| DECENT         | 4         | 4         | 4         | 4         | 4         | 4         | 4         | 5         | 4         | 4          | 4          | 4          | 19         |
| DEGSeq         | 17        | 17        | 17        | 17        | 17        | 17        | 17        | 18        | 17        | 17         | 17         | 17         | 3          |
| DESeqLRT       | 13        | 13        | 13        | 13        | 13        | 13        | 13        | 11        | 13        | 13         | 13         | 13         | 5          |
| DESeqNB        | 9         | 9         | 9         | 9         | 9         | 9         | 9         | 8.5       | 9         | 9          | 9          | 9          | 6          |
| DEsingle       | 5         | 5         | 5         | 5         | 5.5       | 5.5       | 5         | 6.5       | 5         | 5          | 5.5        | 5          | 18         |
| EBSeq          | 1         | 1         | 1         | 1         | 1         | 1         | 1         | 2         | 1         | 1          | 1          | 1          | 17         |
| EdgeR          | 3         | 3         | 3         | 3         | 3         | 3         | 3         | 3         | 3         | 3          | 3          | 3          | 8          |
| EdgeRQLF       | 2         | 2         | 2         | 2         | 2         | 2         | 2         | 1         | 2         | 2          | 2          | 2          | 7          |
| LIMMA          | 10        | 10        | 10        | 10        | 10        | 10        | 10        | 10        | 10        | 10         | 10         | 10         | 16         |
| MAST           | 6         | 6         | 6         | 6         | 5.5       | 5.5       | 6         | 4         | 6         | 6          | 5.5        | 6          | 4          |
| Monocle        | 15        | 15        | 15        | 15        | 15.5      | 15        | 15        | 16        | 15        | 15         | 15.5       | 15         | 11         |
| NBSeq          | 12        | 12        | 12        | 12        | 11.5      | 12        | 12        | 15        | 12        | 12         | 11.5       | 12         | 12         |
| NODES          | 16        | 16        | 16        | 16        | 15.5      | 16        | 16        | 13        | 16        | 16         | 15.5       | 16         | 14         |
| ROTS           | 18        | 18        | 18        | 18        | 18        | 18        | 18        | 17        | 18        | 18         | 18         | 18         | 13         |
| scDD           | 19        | 19        | 19        | 19        | 19        | 19        | 19        | 19        | 19        | 19         | 19         | 19         | 15         |
| T-test         | 14        | 14        | 14        | 14        | 14        | 14        | 14        | 14        | 14        | 14         | 14         | 14         | 10         |
| Wilcox         | 7         | 7         | 7.5       | 7.5       | 7.5       | 7.5       | 7.5       | 6.5       | 7         | 7          | 7.5        | 7.5        | 1          |
| EMDomics       | 8         | 8         | 7.5       | 7.5       | 7.5       | 7.5       | 7.5       | 8.5       | 8         | 8          | 7.5        | 7.5        | 2          |

C1: True Positive; C2: True negative; C3: True Positive Rate; C4: Positive Prediction Rate; C5: Negative Prediction Value; C6: Accuracy; C7: F1 score; C8: AUROC; C9: False Positive; C10: False Negative; C11: False Positive Rate; C12: False Discovery Rate; C13: Runtime

**Table S25.** Conflicts among the criteria for ranking of the DE methods for Islam Ziegenhain data.

| <u>Methods</u> | <u>C1</u> | <u>C2</u> | <u>C3</u> | <u>C4</u> | <u>C5</u> | <u>C6</u> | <u>C7</u> | <u>C8</u> | <u>C9</u> | <u>C10</u> | <u>C11</u> | <u>C12</u> | <u>C13</u> |
|----------------|-----------|-----------|-----------|-----------|-----------|-----------|-----------|-----------|-----------|------------|------------|------------|------------|
| BPSC           | 14        | 14        | 14        | 14        | 14        | 14        | 14        | 11.5      | 14        | 14         | 14         | 14         | 9          |
| DECENT         | 11        | 11        | 11        | 11        | 11        | 11        | 11        | 13        | 11        | 11         | 11         | 11         | 19         |
| DEGSeq         | 16        | 16        | 16        | 16        | 16        | 16        | 16        | 16        | 16        | 16         | 16         | 16         | 3          |
| DESeqLRT       | 8         | 8         | 8         | 8         | 8         | 8         | 8         | 9         | 8         | 8          | 8          | 8          | 5          |
| DESeqNB        | 2         | 2         | 2         | 2         | 2         | 2         | 2         | 2         | 2         | 2          | 2          | 2          | 6          |
| DEsingle       | 3         | 3         | 3         | 3         | 3         | 3         | 3         | 3         | 3         | 3          | 3          | 3          | 18         |
| EBSeq          | 13        | 13        | 13        | 13        | 13        | 13        | 13        | 14        | 13        | 13         | 13         | 13         | 17         |
| edgeRLRT       | 10        | 10        | 10        | 10        | 10        | 10        | 10        | 10        | 10        | 10         | 10         | 10         | 8          |
| edgeRQLF       | 12        | 12        | 12        | 12        | 12        | 12        | 12        | 11.5      | 12        | 12         | 12         | 12         | 7          |
| EMDomics       | 4         | 4         | 4         | 4         | 4         | 4         | 4         | 4         | 4         | 4          | 4          | 4          | 16         |
| LIMMA          | 19        | 19        | 19        | 19        | 19        | 19        | 19        | 19        | 19        | 19         | 19         | 19         | 4          |
| MAST           | 15        | 15        | 15        | 15        | 15        | 15        | 15        | 15        | 15        | 15         | 15         | 15         | 11         |
| Monocle        | 9         | 9         | 9         | 9         | 9         | 9         | 9         | 7.5       | 9         | 9          | 9          | 9          | 12         |
| NBSeq          | 7         | 7         | 7         | 7         | 7         | 7         | 7         | 7.5       | 7         | 7          | 7          | 7          | 14         |
| NODES          | 5         | 5         | 5         | 5         | 5         | 5         | 5         | 6         | 5         | 5          | 5          | 5          | 13         |
| ROTS           | 17        | 17        | 17        | 17        | 17        | 17        | 17        | 18        | 17        | 17         | 17         | 17         | 15         |
| scDD           | 18        | 18        | 18        | 18        | 18        | 18        | 18        | 17        | 18        | 18         | 18         | 18         | 10         |



|        |   |   |   |   |   |   |   |   |   |   |   |   |   |
|--------|---|---|---|---|---|---|---|---|---|---|---|---|---|
| Ttest  | 6 | 6 | 6 | 6 | 6 | 6 | 6 | 5 | 6 | 6 | 6 | 6 | 1 |
| Wilcox | 1 | 1 | 1 | 1 | 1 | 1 | 1 | 1 | 1 | 1 | 1 | 1 | 2 |

C1: True Positive; C2: True negative; C3: True Positive Rate; C4: Positive Prediction Rate; C5: Negative Prediction Value; C6: Accuracy; C7: F1 score; C8: AUROC; C9: False Positive; C10: False Negative; C11: False Positive Rate; C12: False Discovery Rate; C13: Runtime

**Table S26.** Conflicts among the criteria for ranking of the DE methods for Grun data.

| <u>Methods</u> | C1   | C2   | C3   | C4   | C5   | C6   | C7   | C8 | C9   | C10  | C11  | C12  | C13 |
|----------------|------|------|------|------|------|------|------|----|------|------|------|------|-----|
| BPSC           | 1    | 2    | 1    | 1    | 1    | 1    | 1    | 1  | 1    | 1    | 1    | 1    | 9   |
| DECENT         | 3    | 4    | 3    | 3    | 3    | 3    | 3    | 5  | 3    | 3    | 3    | 3    | 19  |
| DEGSeq         | 9    | 10   | 9    | 9    | 8.5  | 9    | 9    | 14 | 9    | 9    | 8.5  | 9    | 3   |
| DESeqLRT       | 15   | 16   | 15   | 15   | 15   | 15   | 15   | 13 | 15   | 15   | 15   | 15   | 5   |
| DESeqNB        | 6    | 7    | 6    | 6    | 6    | 6    | 6    | 6  | 6    | 6    | 6    | 6    | 6   |
| DEsingle       | 12.5 | 13.5 | 12.5 | 12.5 | 12.5 | 12.5 | 12.5 | 10 | 12.5 | 12.5 | 12.5 | 12.5 | 18  |
| EBSeq          | 12.5 | 13.5 | 12.5 | 12.5 | 12.5 | 12.5 | 12.5 | 8  | 12.5 | 12.5 | 12.5 | 12.5 | 17  |
| edgeRLRT       | 4    | 5    | 4    | 4    | 4    | 4    | 4    | 4  | 4    | 4    | 4    | 4    | 8   |
| edgeRQLF       | 2    | 3    | 2    | 2    | 2    | 2    | 2    | 2  | 2    | 2    | 2    | 2    | 7   |
| EMDomics       | 19   | 1    | 19   | 19   | 19   | 19   | 19   | 19 | 19   | 19   | 19   | 19   | 16  |
| LIMMA          | 14   | 15   | 14   | 14   | 14   | 14   | 14   | 11 | 14   | 14   | 14   | 14   | 4   |
| MAST           | 5    | 6    | 5    | 5    | 5    | 5    | 5    | 3  | 5    | 5    | 5    | 5    | 11  |
| Monocle        | 11   | 12   | 11   | 11   | 11   | 11   | 11   | 15 | 11   | 11   | 11   | 11   | 12  |
| NBSeq          | 18   | 19   | 18   | 18   | 18   | 18   | 18   | 18 | 18   | 18   | 18   | 18   | 14  |
| NODES          | 16   | 17   | 16   | 16   | 16   | 16   | 16   | 16 | 16   | 16   | 16   | 16   | 13  |
| ROTS           | 8    | 9    | 8    | 8    | 8.5  | 8    | 8    | 9  | 8    | 8    | 8.5  | 8    | 15  |
| scDD           | 17   | 18   | 17   | 17   | 17   | 17   | 17   | 17 | 17   | 17   | 17   | 17   | 10  |
| T-test         | 10   | 11   | 10   | 10   | 10   | 10   | 10   | 12 | 10   | 10   | 10   | 10   | 1   |
| Wilcox         | 7    | 8    | 7    | 7    | 7    | 7    | 7    | 7  | 7    | 7    | 7    | 7    | 2   |

C1: True Positive; C2: True negative; C3: True Positive Rate; C4: Positive Prediction Rate; C5: Negative Prediction Value; C6: Accuracy; C7: F1 score; C8: AUROC; C9: False Positive; C10: False Negative; C11: False Positive Rate; C12: False Discovery Rate; C13: Runtime

**Table S27.** Conflicts among the criteria for ranking of the DE methods for Soumilion1 data.

| <u>Methods</u> | C1 | C2 | C3 | C4 | C5 | C6  | C7 | C8 | C9 | C10 | C11 | C12 | C13 |
|----------------|----|----|----|----|----|-----|----|----|----|-----|-----|-----|-----|
| BPSC           | 12 | 12 | 12 | 12 | 12 | 12  | 12 | 14 | 12 | 12  | 12  | 12  | 9   |
| DECENT         | 4  | 3  | 4  | 4  | 4  | 4   | 4  | 3  | 4  | 4   | 4   | 4   | 19  |
| DEGSeq         | 8  | 8  | 8  | 8  | 8  | 8   | 8  | 11 | 8  | 8   | 8   | 8   | 3   |
| DESeqLRT       | 19 | 19 | 19 | 19 | 19 | 19  | 19 | 19 | 19 | 19  | 19  | 19  | 5   |
| DESeqNB        | 11 | 11 | 11 | 11 | 11 | 11  | 11 | 6  | 11 | 11  | 11  | 11  | 6   |
| DEsingle       | 15 | 15 | 15 | 15 | 15 | 15  | 15 | 10 | 15 | 15  | 15  | 15  | 18  |
| EBSeq          | 1  | 1  | 1  | 1  | 1  | 1   | 1  | 1  | 1  | 1   | 1   | 1   | 17  |
| edgeRLRT       | 7  | 7  | 7  | 7  | 7  | 6.5 | 7  | 8  | 7  | 7   | 7   | 7   | 8   |
| edgeRQLF       | 2  | 2  | 2  | 2  | 2  | 2   | 2  | 2  | 2  | 2   | 2   | 2   | 7   |
| EMDomics       | 13 | 13 | 13 | 13 | 14 | 13  | 13 | 13 | 13 | 13  | 14  | 13  | 16  |
| LIMMA          | 10 | 10 | 10 | 10 | 10 | 10  | 10 | 15 | 10 | 10  | 10  | 10  | 4   |
| MAST           | 6  | 6  | 6  | 6  | 6  | 6.5 | 6  | 5  | 6  | 6   | 6   | 6   | 11  |
| Monocle        | 5  | 5  | 5  | 5  | 5  | 5   | 5  | 7  | 5  | 5   | 5   | 5   | 12  |
| NBSeq          | 3  | 4  | 3  | 3  | 3  | 3   | 3  | 4  | 3  | 3   | 3   | 3   | 14  |
| NODES          | 16 | 16 | 16 | 16 | 16 | 16  | 16 | 16 | 16 | 16  | 16  | 16  | 13  |
| ROTS           | 17 | 17 | 17 | 17 | 17 | 17  | 17 | 17 | 17 | 17  | 17  | 17  | 15  |

|        |    |    |    |    |    |    |    |    |    |    |    |    |    |
|--------|----|----|----|----|----|----|----|----|----|----|----|----|----|
| scDD   | 18 | 18 | 18 | 18 | 18 | 18 | 18 | 18 | 18 | 18 | 18 | 18 | 10 |
| Ttest  | 9  | 9  | 9  | 9  | 9  | 9  | 9  | 9  | 9  | 9  | 9  | 9  | 1  |
| Wilcox | 14 | 14 | 14 | 14 | 13 | 14 | 14 | 12 | 14 | 14 | 13 | 14 | 2  |

C1: True Positive; C2: True negative; C3: True Positive Rate; C4: Positive Prediction Rate; C5: Negative Prediction Value; C6: Accuracy; C7: F1 score; C8: AUROC; C9: False Positive; C10: False Negative; C11: False Positive Rate; C12: False Discovery Rate; C13: Runtime

**Table S28.** Conflicts among the criteria for ranking of the DE methods for Klein data.

| <b>Methods</b> | <b>C1</b> | <b>C2</b> | <b>C3</b> | <b>C4</b> | <b>C5</b> | <b>C6</b> | <b>C7</b> | <b>C8</b> | <b>C9</b> | <b>C10</b> | <b>C11</b> | <b>C12</b> | <b>C13</b> |
|----------------|-----------|-----------|-----------|-----------|-----------|-----------|-----------|-----------|-----------|------------|------------|------------|------------|
| BPSC           | 16        | 16        | 16        | 16        | 16.5      | 16        | 16        | 16        | 16        | 16         | 16.5       | 16         | 9          |
| DECENT         | 4         | 4         | 4         | 4         | 3.5       | 4         | 4         | 2         | 4         | 4          | 3.5        | 4          | 19         |
| DEGSeq         | 3         | 3         | 3         | 3         | 3.5       | 3         | 3         | 4         | 3         | 3          | 3.5        | 3          | 3          |
| DESeqLRT       | 17        | 17        | 17        | 17        | 16.5      | 17        | 17        | 15        | 17        | 17         | 16.5       | 17         | 5          |
| DESeqNB        | 12        | 12        | 11.5      | 11.5      | 9.5       | 11.5      | 11.5      | 11        | 12        | 12         | 9.5        | 11.5       | 6          |
| DEsingle       | 7         | 7         | 7.5       | 7.5       | 9.5       | 7.5       | 7.5       | 8         | 7         | 7          | 9.5        | 7.5        | 18         |
| EBSeq          | 11        | 11        | 11.5      | 11.5      | 9.5       | 11.5      | 11.5      | 13        | 11        | 11         | 9.5        | 11.5       | 17         |
| edgeRLRT       | 10        | 10        | 9.5       | 9.5       | 9.5       | 11.5      | 9.5       | 10        | 10        | 10         | 9.5        | 9.5        | 8          |
| edgeQLF        | 8         | 8         | 7.5       | 7.5       | 9.5       | 7.5       | 7.5       | 5         | 8         | 8          | 9.5        | 7.5        | 7          |
| EMDomics       | 1         | 1         | 1         | 1         | 1         | 1         | 1         | 1         | 1         | 1          | 1          | 1          | 16         |
| LIMMA          | 14        | 14        | 14        | 14        | 14.5      | 14        | 14        | 17        | 14        | 14         | 14.5       | 14         | 4          |
| MAST           | 2         | 2         | 2         | 2         | 2         | 2         | 2         | 3         | 2         | 2          | 2          | 2          | 11         |
| Monocle        | 6         | 6         | 6         | 6         | 6         | 6         | 6         | 9         | 6         | 6          | 6          | 6          | 12         |
| NBSeq          | 5         | 5         | 5         | 5         | 5         | 5         | 5         | 6         | 5         | 5          | 5          | 5          | 14         |
| NODES          | 18        | 18        | 18        | 18        | 18        | 18        | 18        | 18        | 18        | 18         | 18         | 18         | 13         |
| ROTS           | 15        | 15        | 15        | 15        | 14.5      | 15        | 15        | 14        | 15        | 15         | 14.5       | 15         | 15         |
| scDD           | 19        | 19        | 19        | 19        | 19        | 19        | 19        | 19        | 19        | 19         | 19         | 19         | 10         |
| T-test         | 13        | 13        | 13        | 13        | 9.5       | 11.5      | 13        | 12        | 13        | 13         | 9.5        | 13         | 1          |
| Wilcox         | 9         | 9         | 9.5       | 9.5       | 13        | 9         | 9.5       | 7         | 9         | 9          | 13         | 9.5        | 2          |

C1: True Positive; C2: True negative; C3: True Positive Rate; C4: Positive Prediction Rate; C5: Negative Prediction Value; C6: Accuracy; C7: F1 score; C8: AUROC; C9: False Positive; C10: False Negative; C11: False Positive Rate; C12: False Discovery Rate; C13: Runtime

**Table S29.** Conflicts among the criteria for ranking of the DE methods for Soumillon3 data.

| <b>Methods</b> | <b>C1</b> | <b>C2</b> | <b>C3</b> | <b>C4</b> | <b>C5</b> | <b>C6</b> | <b>C7</b> | <b>C8</b> | <b>C9</b> | <b>C10</b> | <b>C11</b> | <b>C12</b> | <b>C13</b> |
|----------------|-----------|-----------|-----------|-----------|-----------|-----------|-----------|-----------|-----------|------------|------------|------------|------------|
| BPSC           | 10        | 10        | 10        | 10        | 10.5      | 9.5       | 10        | 12        | 10        | 10         | 10.5       | 10         | 9          |
| DECENT         | 1         | 1         | 1         | 1         | 1         | 1         | 1         | 1         | 1         | 1          | 1          | 1          | 19         |
| DEGSeq         | 15        | 15        | 15        | 15        | 15        | 15        | 15        | 15        | 15        | 15         | 15         | 15         | 3          |
| DESeqLRT       | 18        | 18        | 18        | 18        | 18        | 18        | 18        | 18        | 18        | 18         | 18         | 18         | 5          |
| DESeqNB        | 9         | 9         | 9         | 9         | 10.5      | 9.5       | 9         | 7         | 9         | 9          | 10.5       | 9          | 6          |
| DEsingle       | 14        | 14        | 14        | 14        | 14        | 14        | 14        | 13        | 14        | 14         | 14         | 14         | 18         |
| EBSeq          | 6         | 6         | 6         | 6         | 5.5       | 6         | 6         | 10        | 6         | 6          | 5.5        | 6          | 17         |
| edgeRLRT       | 3.5       | 3.5       | 3.5       | 3.5       | 3.5       | 3.5       | 3.5       | 5         | 3.5       | 3.5        | 3.5        | 3.5        | 8          |
| edgeQLF        | 5         | 5         | 5         | 5         | 5.5       | 5         | 5         | 4         | 5         | 5          | 5.5        | 5          | 7          |
| EMDomics       | 2         | 2         | 2         | 2         | 2         | 2         | 2         | 2         | 2         | 2          | 2          | 2          | 16         |
| LIMMA          | 7         | 7         | 7         | 7         | 7         | 7         | 7         | 3         | 7         | 7          | 7          | 7          | 4          |
| MAST           | 13        | 13        | 13        | 13        | 13        | 13        | 13        | 11        | 13        | 13         | 13         | 13         | 11         |
| Monocle        | 12        | 12        | 12        | 12        | 12        | 12        | 12        | 14        | 12        | 12         | 12         | 12         | 12         |

|        |     |     |     |     |     |     |     |    |     |     |     |     |    |
|--------|-----|-----|-----|-----|-----|-----|-----|----|-----|-----|-----|-----|----|
| NBSeq  | 8   | 8   | 8   | 8   | 8   | 8   | 8   | 8  | 8   | 8   | 8   | 8   | 14 |
| NODES  | 17  | 17  | 17  | 17  | 17  | 17  | 17  | 16 | 17  | 17  | 17  | 17  | 13 |
| ROTS   | 16  | 16  | 16  | 16  | 16  | 16  | 16  | 17 | 16  | 16  | 16  | 16  | 15 |
| scDD   | 19  | 19  | 19  | 19  | 19  | 19  | 19  | 19 | 19  | 19  | 19  | 19  | 10 |
| T-test | 3.5 | 3.5 | 3.5 | 3.5 | 3.5 | 3.5 | 3.5 | 6  | 3.5 | 3.5 | 3.5 | 3.5 | 1  |
| Wilcox | 11  | 11  | 11  | 11  | 9   | 11  | 11  | 9  | 11  | 11  | 9   | 11  | 2  |

C1: True Positive; C2: True negative; C3: True Positive Rate; C4: Positive Prediction Rate; C5: Negative Prediction Value; C6: Accuracy; C7: F1 score; C8: AUROC; C9: False Positive; C10: False Negative; C11: False Positive Rate; C12: False Discovery Rate; C13: Runtime

**Table S30.** Conflicts among the criteria for ranking of the DE methods for Soumillon2 data.

| <u>Methods</u> | C1 | C2 | C3  | C4  | C5   | C6   | C7  | C8  | C9 | C10 | C11  | C12 | C13 |
|----------------|----|----|-----|-----|------|------|-----|-----|----|-----|------|-----|-----|
| BPSC           | 8  | 8  | 8   | 8   | 8    | 8    | 8   | 6   | 8  | 8   | 8    | 8   | 9   |
| DECENT         | 1  | 1  | 1   | 1   | 1    | 1    | 1   | 1   | 1  | 1   | 1    | 1   | 19  |
| DEGSeq         | 14 | 14 | 14  | 14  | 14   | 14   | 14  | 18  | 14 | 14  | 14   | 14  | 3   |
| DESeqLRT       | 13 | 13 | 13  | 13  | 13   | 13   | 13  | 13  | 13 | 13  | 13   | 13  | 5   |
| DESeqNB        | 2  | 2  | 2   | 2   | 2    | 2    | 2   | 2   | 2  | 2   | 2    | 2   | 6   |
| DEsingle       | 10 | 10 | 10  | 10  | 10   | 10   | 10  | 9   | 10 | 10  | 10   | 10  | 18  |
| EBSeq          | 17 | 17 | 17  | 17  | 17   | 17   | 17  | 14  | 17 | 17  | 17   | 17  | 17  |
| edgeRLRT       | 4  | 4  | 4   | 4   | 4    | 4    | 4   | 5   | 4  | 4   | 4    | 4   | 8   |
| edgeRQLF       | 5  | 5  | 5   | 5   | 5    | 5    | 5   | 4   | 5  | 5   | 5    | 5   | 7   |
| EMDomics       | 18 | 18 | 18  | 18  | 18   | 18   | 18  | 17  | 18 | 18  | 18   | 18  | 16  |
| LIMMA          | 3  | 3  | 3   | 3   | 3    | 3    | 3   | 3   | 3  | 3   | 3    | 3   | 4   |
| MAST           | 12 | 12 | 12  | 12  | 12   | 12   | 12  | 12  | 12 | 12  | 12   | 12  | 11  |
| Monocle        | 9  | 9  | 9   | 9   | 9    | 9    | 9   | 11  | 9  | 9   | 9    | 9   | 12  |
| NBSeq          | 7  | 7  | 7   | 7   | 6.5  | 6.5  | 7   | 8   | 7  | 7   | 6.5  | 7   | 14  |
| NODES          | 15 | 15 | 15  | 15  | 15.5 | 15.5 | 15  | 15  | 15 | 15  | 15.5 | 15  | 13  |
| ROTS           | 16 | 16 | 16  | 16  | 15.5 | 15.5 | 16  | 16  | 16 | 16  | 15.5 | 16  | 15  |
| scDD           | 19 | 19 | 19  | 19  | 19   | 19   | 19  | 19  | 19 | 19  | 19   | 19  | 10  |
| T-test         | 6  | 6  | 6   | 6   | 6.5  | 6.5  | 6   | 7   | 6  | 6   | 6.5  | 6   | 1   |
| Wilcox         | 8  | 8  | 7.5 | 7.5 | 7.5  | 7.5  | 7.5 | 8.5 | 8  | 8   | 7.5  | 7.5 | 2   |

C1: True Positive; C2: True negative; C3: True Positive Rate; C4: Positive Prediction Rate; C5: Negative Prediction Value; C6: Accuracy; C7: F1 score; C8: AUROC; C9: False Positive; C10: False Negative; C11: False Positive Rate; C12: False Discovery Rate; C13: Runtime

**Table S31.** Effect of the number of cells on the performance (ranking) of the DE methods assessed through AUROC.

| <u>Methods</u> | <u>Small</u> |    |      |    | <u>Score</u> | <u>Medium</u> |    |    |      | <u>Score</u> | <u>Large</u> |    |      |  | <u>Score</u> |
|----------------|--------------|----|------|----|--------------|---------------|----|----|------|--------------|--------------|----|------|--|--------------|
| BPSC           | 15           | 12 | 11.5 | 1  | 2.13         | 14            | 16 | 12 | 17.5 | 1.08         | 12           | 6  | 16.5 |  | 1.34         |
| DECENT         | 4            | 5  | 13   | 5  | 2.79         | 3             | 2  | 4  | 2    | 3.63         | 1            | 1  | 3    |  | 2.89         |
| DEGSeq         | 16           | 18 | 16   | 14 | 0.84         | 11            | 4  | 14 | 5    | 2.42         | 15           | 18 | 13   |  | 0.74         |
| DESeqLRT       | 6            | 11 | 9    | 13 | 2.16         | 19            | 15 | 18 | 9    | 1.00         | 18           | 13 | 18   |  | 0.58         |

|          |    |     |      |    |      |    |    |     |      |      |    |    |      |      |
|----------|----|-----|------|----|------|----|----|-----|------|------|----|----|------|------|
| DESeqNB  | 1  | 8.5 | 2    | 6  | 3.29 | 6  | 11 | 17  | 7    | 2.05 | 7  | 2  | 10   | 2.16 |
| DEsingle | 10 | 6.5 | 3    | 10 | 2.66 | 10 | 8  | 11  | 17.5 | 1.76 | 13 | 9  | 11   | 1.42 |
| EBSeq    | 9  | 2   | 14   | 8  | 2.47 | 1  | 13 | 1   | 1    | 3.37 | 10 | 14 | 1    | 1.84 |
| edgeRLRT | 3  | 3   | 10   | 4  | 3.16 | 8  | 10 | 8.5 | 14.5 | 2.05 | 5  | 5  | 7    | 2.26 |
| edgeRQLF | 2  | 1   | 11.5 | 2  | 3.34 | 2  | 5  | 5   | 14.5 | 2.82 | 4  | 4  | 4.5  | 2.50 |
| EMDomics | 5  | 8.5 | 4    | 19 | 2.29 | 13 | 1  | 10  | 7    | 2.58 | 2  | 17 | 9    | 1.68 |
| LIMMA    | 18 | 10  | 19   | 11 | 1.16 | 15 | 17 | 8.5 | 4    | 1.87 | 3  | 3  | 2    | 2.74 |
| MAST     | 14 | 4   | 15   | 3  | 2.32 | 5  | 3  | 16  | 12   | 2.32 | 11 | 12 | 15   | 1.16 |
| Monocle  | 12 | 16  | 7.5  | 15 | 1.55 | 7  | 9  | 2   | 3    | 3.11 | 14 | 11 | 6    | 1.53 |
| NBSeq    | 11 | 15  | 7.5  | 18 | 1.50 | 4  | 6  | 3   | 7    | 3.16 | 8  | 8  | 12   | 1.68 |
| NODES    | 19 | 13  | 6    | 16 | 1.37 | 16 | 18 | 13  | 11   | 1.16 | 16 | 15 | 14   | 0.79 |
| ROTS     | 13 | 17  | 18   | 9  | 1.21 | 17 | 14 | 15  | 14.5 | 1.03 | 17 | 16 | 16.5 | 0.55 |
| scDD     | 17 | 19  | 17   | 17 | 0.53 | 18 | 19 | 19  | 10   | 0.74 | 19 | 19 | 19   | 0.16 |
| Ttest    | 8  | 14  | 5    | 12 | 2.16 | 9  | 12 | 7   | 14.5 | 1.97 | 6  | 7  | 8    | 2.05 |
| Wilcox   | 7  | 6.5 | 1    | 7  | 3.08 | 12 | 7  | 6   | 19   | 1.89 | 9  | 10 | 4.5  | 1.92 |

Small number of cells (< 600) in scRNA-seq; Medium number of cells (600 – 2000) scRNA-seq; Large number of cells (> 2000); score: Average of the rank scores computed through Eq. 32 based on the AUROC measure

**Table S32.** ANOVA table for studying the effects of number of cells and cells/group on performance of DE methods.

| Source of variation | df  | SS     | MS      | F-value | Pr (> F) | Sig. |
|---------------------|-----|--------|---------|---------|----------|------|
| Methods             | 18  | 0.9223 | 0.05124 | 4.4213  | 4.49E-08 | ***  |
| Data                | 10  | 2.7733 | 0.27733 | 23.930  | 2.00E-16 | ***  |
| Number of cells     | 2   | 0.6117 | 0.30585 | 26.391  | 5.58E-11 | ***  |
| Cells/group         | 2   | 0.6348 | 0.3174  | 27.388  | 5.64E-11 | ***  |
| Residuals           | 176 | 2.0397 | 0.0116  |         |          |      |
| Total               | 208 | 6.9818 | 0.0336  |         |          |      |

df: degrees of freedom; SS: Sum of Squares; MS: Mean Squares; Sig. Significance status;

\*\*\*: values significant at 0.1% level of significance

## References

- Islam S, Kjällquist U, Moliner A, Zajac P, Fan JB, Lönnerberg P, et al. Characterization of the single-cell transcriptional landscape by highly multiplex RNA-seq. *Genome Res.* 2011. doi:10.1101/gr.110882.110
- Tung P-Y, Blischak JD, Hsiao CJ, Knowles DA, Burnett JE, Pritchard JK, et al. Batch effects and the effective design of single-cell gene expression studies. *Sci Rep.* 2017;7: 39921. doi:10.1038/srep39921

3. Soumillon M, Cacchiarelli D, Semrau S, van Oudenaarden A, Mikkelsen TS. Characterization of directed differentiation by high-throughput single-cell RNA-Seq. *bioRxiv*. 2014. doi:10.1101/003236
4. Klein AM, Mazutis L, Akartuna I, Tallapragada N, Veres A, Li V, et al. Droplet barcoding for single-cell transcriptomics applied to embryonic stem cells. *Cell*. 2015. doi:10.1016/j.cell.2015.04.044
5. Gierahn TM, Wadsworth MH, Hughes TK, Bryson BD, Butler A, Satija R, et al. Seq-Well: Portable, low-cost rna sequencing of single cells at high throughput. *Nat Methods*. 2017. doi:10.1038/nmeth.4179
6. Das S, Rai SN. SwarnSeq: An improved statistical approach for differential expression analysis of single-cell RNA-seq data. *Genomics*. 2021;113: 1308–1324. doi:10.1016/j.ygeno.2021.02.014
7. Das S, Rai SN. Statistical methods for analysis of single-cell RNA-sequencing data. *MethodsX*. 2021;8: 101580. doi:https://doi.org/10.1016/j.mex.2021.101580
8. Moliner A, Enfors P, Ibáñez CF, Andäng M. Mouse embryonic stem cell-derived spheres with distinct neurogenic potentials. *Stem Cells Dev*. 2008. doi:10.1089/scd.2007.0211
9. Liang Y, Zhang F, Wang J, Joshi T, Wang Y, Xu D. Prediction of Drought-Resistant Genes in *Arabidopsis thaliana* Using SVM-RFE. Zhu D, editor. *PLoS One*. 2011;6: e21750. doi:10.1371/journal.pone.0021750
10. Das S, Meher PK, Rai A, Bhar LM, Mandal BN. Statistical Approaches for Gene Selection, Hub Gene Identification and Module Interaction in Gene Co-Expression Network Analysis: An Application to Aluminum Stress in Soybean (*Glycine max* L.). Tian Z, editor. *PLoS One*. 2017;12: e0169605. doi:10.1371/journal.pone.0169605
11. Li J, Tibshirani R. Finding consistent patterns: A nonparametric approach for identifying differential expression in RNA-Seq data. *Stat Methods Med Res*. 2013. doi:10.1177/0962280211428386
12. Love MI, Huber W, Anders S. Moderated estimation of fold change and dispersion for RNA-seq data with DESeq2. *Genome Biol*. 2014. doi:10.1186/s13059-014-0550-8
13. Love MI, Anders S, Huber W. Differential analysis of count data - the DESeq2 package. *Genome Biology*. 2014. doi:10.1186/s13059-014-0550-8
14. Robinson MD, McCarthy DJ, Smyth GK. edgeR: a Bioconductor package for differential expression analysis of digital gene expression data. *Bioinformatics*. 2010;26: 139–140. doi:10.1093/bioinformatics/btp616
15. Van den Berge K, Perraudeau F, Soneson C, Love MI, Risso D, Vert J-P, et al. Observation weights unlock bulk RNA-seq tools for zero inflation and single-cell applications. *Genome Biol*. 2018;19: 24. doi:10.1186/s13059-018-1406-4
16. Risso D, Perraudeau F, Gribkova S, Dudoit S, Vert J-P. A general and flexible method for signal extraction from single-cell RNA-seq data. *Nat Commun*. 2018;9: 284. doi:10.1038/s41467-017-02554-5
17. Van den Berge K, Soneson C, Love MI, Robinson MD, Clement L. zingerR: unlocking RNA-seq tools for zero-inflation and single cell applications. *doi.org*. 2017. doi:10.1101/157982
18. Miao Z, Deng K, Wang X, Zhang X. DEsingle for detecting three types of differential expression in single-cell RNA-seq data. Berger B, editor. *Bioinformatics*. 2018;34: 3223–3224. doi:10.1093/bioinformatics/bty332
19. Ye C, Speed TP, Salim A. DECENT: differential expression with capture efficiency adjustmeNT for single-cell RNA-seq data. Berger B, editor. *Bioinformatics*. 2019;35: 5155–

5162. doi:10.1093/bioinformatics/btz453
20. Zeileis A, Kleiber C, Jackman S. Regression models for count data in R. *J Stat Softw.* 2008. doi:10.18637/jss.v027.i08
  21. KEMP CD, KEMP AW. Some properties of the “Hermite” distribution. *Biometrika.* 1965;52: 381–394. doi:10.1093/biomet/52.3-4.381
  22. Robinson MD, McCarthy DJ, Smyth GK. edgeR: a Bioconductor package for differential expression analysis of digital gene expression data. *Bioinformatics.* 2010;26: 139–140. doi:10.1093/bioinformatics/btp616
  23. Robinson MD, Oshlack A. A scaling normalization method for differential expression analysis of RNA-seq data. *Genome Biol.* 2010. doi:10.1186/gb-2010-11-3-r25
  24. Anders S, Huber W. Differential expression analysis for sequence count data. *Genome Biol.* 2010;11: R106. doi:10.1186/gb-2010-11-10-r106
  25. Wang L, Feng Z, Wang X, Wang X, Zhang X. DEGseq: An R package for identifying differentially expressed genes from RNA-seq data. *Bioinformatics.* 2009. doi:10.1093/bioinformatics/btp612
  26. Smyth GK. limma: Linear Models for Microarray Data. *Bioinformatics and Computational Biology Solutions Using R and Bioconductor.* doi:10.1007/0-387-29362-0\_23
  27. Seyednasrollah F, Rantanen K, Jaakkola P, Elo LL. ROTS: Reproducible RNA-seq biomarker detector - Prognostic markers for clear cell renal cell cancer. *Nucleic Acids Res.* 2016. doi:10.1093/nar/gkv806
  28. Di Y, Schafer DW, Cumbie JS, Chang JH. The NBP negative binomial model for assessing differential gene expression from RNA-Seq. *Stat Appl Genet Mol Biol.* 2011. doi:10.2202/1544-6115.1637
  29. Leng N, Dawson JA, Thomson JA, Ruotti V, Rissman AI, Smits BMG, et al. EBSeq: an empirical Bayes hierarchical model for inference in RNA-seq experiments. *Bioinformatics.* 2013;29: 1035–1043. doi:10.1093/bioinformatics/btt087
  30. Welch BL. The Generalization of ‘Student’s’ Problem when Several Different Population Variances are Involved. *Biometrika.* 1947. doi:10.2307/2332510
  31. Wilcoxon F. Individual Comparisons by Ranking Methods. *Biometrics Bull.* 1945;1: 80. doi:10.2307/3001968
  32. Qiu X, Hill A, Packer J, Lin D, Ma Y-A, Trapnell C. Single-cell mRNA quantification and differential analysis with Census. *Nat Methods.* 2017;14: 309–315. doi:10.1038/nmeth.4150
  33. Finak G, McDavid A, Yajima M, Deng J, Gersuk V, Shalek AK, et al. MAST: a flexible statistical framework for assessing transcriptional changes and characterizing heterogeneity in single-cell RNA sequencing data. *Genome Biol.* 2015;16: 278. doi:10.1186/s13059-015-0844-5
  34. Korthauer KD, Chu LF, Newton MA, Li Y, Thomson J, Stewart R, et al. A statistical approach for identifying differential distributions in single-cell RNA-seq experiments. *Genome Biol.* 2016. doi:10.1186/s13059-016-1077-y
  35. Vu TN, Wills QF, Kalari KR, Niu N, Wang L, Rantalainen M, et al. Beta-Poisson model for single-cell RNA-seq data analyses. *Bioinformatics.* 2016. doi:10.1093/bioinformatics/btw202
  36. Sengupta D, Rayan NA, Lim M, Lim B, Prabhakar S. Fast, scalable and accurate differential expression analysis for single cells. *bioRxiv.* 2016. doi:10.1101/049734
  37. Nabavi S, Schmolze D, Maitituoheti M, Malladi S, Beck AH. EMDomics: A robust and powerful method for the identification of genes differentially expressed between heterogeneous classes. *Bioinformatics.* 2016. doi:10.1093/bioinformatics/btv634

38. Yoon K, Hwang C-L. Multiple Attribute Decision Making. Multiple Attribute Decision Making. 2455 Teller Road, Thousand Oaks California 91320 United States of America: SAGE Publications, Inc.; 1995. doi:10.4135/9781412985161
39. Khezrian M, Jahan A, Kadir WMNW, Ibrahim S. An approach for web service selection based on confidence level of decision maker. PLoS One. 2014. doi:10.1371/journal.pone.0097831
40. Ahn BS. Compatible weighting method with rank order centroid: Maximum entropy ordered weighted averaging approach. Eur J Oper Res. 2011. doi:10.1016/j.ejor.2011.02.017
41. Das S, Rai A, Mishra DC, Rai SN. Statistical approach for selection of biologically informative genes. Gene. 2018;655. doi:10.1016/j.gene.2018.02.044
42. Assari A. Role of public participation in sustainability of historical city: usage of TOPSIS method. Indian J Sci Technol. 2012. doi:10.17485/ijst/2012/v5i3.2
43. Boon WC, Petkovic-Duran K, Zhu Y, Manasseh R, Horne MK, Aumann TD. Increasing cDNA yields from single-cell quantities of mRNA in standard laboratory reverse transcriptase reactions using acoustic microstreaming. J Vis Exp. 2011. doi:10.3791/3144
44. Macaulay IC, Voet T. Single Cell Genomics: Advances and Future Perspectives. PLoS Genetics. 2014. doi:10.1371/journal.pgen.1004126
45. Marinov GK, Williams BA, McCue K, Schroth GP, Gertz J, Myers RM, et al. From single-cell to cell-pool transcriptomes: Stochasticity in gene expression and RNA splicing. Genome Res. 2014. doi:10.1101/gr.161034.113
46. Kharchenko P V., Silberstein L, Scadden DT. Bayesian approach to single-cell differential expression analysis. Nat Methods. 2014;11: 740–742. doi:10.1038/nmeth.2967
47. Pierson E, Yau C. ZIFA: Dimensionality reduction for zero-inflated single-cell gene expression analysis. Genome Biol. 2015. doi:10.1186/s13059-015-0805-z
48. Wang Y, Navin NE. Advances and Applications of Single-Cell Sequencing Technologies. Molecular Cell. 2015. doi:10.1016/j.molcel.2015.05.005
49. McElduff F, Cortina-Borja M, Chan SK, Wade A. When t-tests or Wilcoxon-Mann-Whitney tests won't do. Am J Physiol - Adv Physiol Educ. 2010. doi:10.1152/advan.00017.2010
50. Hardcastle TJ, Kelly KA. BaySeq: Empirical Bayesian methods for identifying differential expression in sequence count data. BMC Bioinformatics. 2010. doi:10.1186/1471-2105-11-422
51. Trapnell C, Hendrickson DG, Sauvageau M, Goff L, Rinn JL, Pachter L. Differential analysis of gene regulation at transcript resolution with RNA-seq. Nat Biotechnol. 2013. doi:10.1038/nbt.2450
52. Jackman S, Tahk A, Zeileis A, Maimone C, Fearon J, Maintainer ZM. Package “pscl”: Political Science Computational Laboratory. R Packag Vignettes Collect. 2017.
